# Supplementary material
Source: PubMed Central journal article supplement (PMC4966321)
Supplement: JCI85506.sd.pdf [file JCI85506.sd.pdf]

## Supplemental Methods

### Database analysis and data mining

Analysis of copy number variation mutation rates in human cancer was done by using the TCGA liver cancer dataset (LIHC; <https://tcga-data.nci.nih.gov/tcga/>) with the ONCOMINE browser (<https://www.oncomine.org/>) and the COSMIC database (<http://cancer.sanger.ac.uk/cancergenome/projects/cosmic/>) on 07-28-2015. The data for E2F7/8 developmental and tumor associated target expression was obtained from TCGA tumor data sets using cbiportal (<http://www.cbiportal.org/>). Patients from Liver Hepatocellular Carcinoma (TCGA, Provisional) project with RNA-seq v2 data were selected.

### Supplemental Reference

43. Ferroudj S et al. Role of fanconi anemia/BRCA pathway genes in hepatocellular carcinoma chemoresistance. *Hepatol. Res.* [published online ahead of print: February 16, 2016]; doi:10.1111/hepr.12675.
44. Itzel T et al. Translating bioinformatics in oncology: guilt-by-profiling analysis and identification of KIF18B and CDCA3 as novel driver genes in carcinogenesis. *Bioinformatics* 2015;31(2):216–224.
45. Lu G et al. Overexpression of CENP-H as a novel prognostic biomarker for human hepatocellular carcinoma progression and patient survival. *Oncol. Rep.* 2013;30(5):2238–2244.
46. Hong J et al. CHK1 targets spleen tyrosine kinase (L) for proteolysis in hepatocellular carcinoma. *J. Clin. Invest.* 2012;122(6):2165–2175.
47. Pan H-W et al. Role of L2DTL, cell cycle-regulated nuclear and centrosome protein, in aggressive hepatocellular carcinoma. *Cell Cycle* 2006;5(22):2676–2687.
48. Feng H et al. A CCRK-EZH2 epigenetic circuitry drives hepatocarcinogenesis and associates with tumor recurrence and poor survival of patients. *J. Hepatol.* 2015;62(5):1100–1111.

49. Zhao Y et al. Early mitotic inhibitor-1, an anaphase-promoting complex/cyclosome inhibitor, can control tumor cell proliferation in hepatocellular carcinoma: correlation with Skp2 stability and degradation of p27(Kip1). *Hum. Pathol.* 2013;44(3):365–373.
50. Kwon J-H et al. Overexpression of high-mobility group box 2 is associated with tumor aggressiveness and prognosis of hepatocellular carcinoma. *Clin. Cancer Res.* 2010;16(22):5511–5521.
51. Liao W et al. High KIF18A expression correlates with unfavorable prognosis in primary hepatocellular carcinoma. *Oncotarget* 2014;5(21):10271–10279.
52. Sun M et al. Expression profile reveals novel prognostic biomarkers in hepatocellular carcinoma. *Front Biosci (Elite Ed)* 2010;2:829–840.
53. Zhou Y-M et al. MCM7 expression predicts post-operative prognosis for hepatocellular carcinoma. *Liver Int.* 2012;32(10):1505–1509.
54. Zhang M et al. [Expression of Nusap1 in the surgical margins of hepatocellular carcinoma and its association with early recurrence]. *Nan Fang Yi Ke Da Xue Xue Bao* 2013;33(6):937–938, inside back cover.
55. Nakajima T et al. Evaluation of hepatic proliferative activity in chronic liver diseases and hepatocellular carcinomas by proliferating cell nuclear antigen (PCNA) immunohistochemical staining of methanol-fixed tissues. *J. Gastroenterol.* 1994;29(4):450–454.
56. Sanefuji K et al. Significance of DNA polymerase delta catalytic subunit p125 induced by mutant p53 in the invasive potential of human hepatocellular carcinoma. *Oncology* 2010;79(3-4):229–237.
57. Tao H-C et al. Targeting SHCBP1 inhibits cell proliferation in human hepatocellular carcinoma cells. *Asian Pac. J. Cancer Prev.* 2013;14(10):5645–5650.
58. Zhou B et al. Overexpression of the structural maintenance of chromosome 4 protein is associated with tumor de-differentiation, advanced stage and vascular invasion of primary liver cancer. *Oncol. Rep.* 2012;28(4):1263–1268.

59. Zhou B et al. A novel miR-219-SMC4-JAK2/Stat3 regulatory pathway in human hepatocellular carcinoma. *J. Exp. Clin. Cancer Res.* 2014;33:55.
60. Lin Y-M et al. Disturbance of circadian gene expression in hepatocellular carcinoma. *Mol. Carcinog.* 2008;47(12):925–933.
61. Huang Y, Guo W, Kan H. TPX2 is a prognostic marker and contributes to growth and metastasis of human hepatocellular carcinoma. *Int J Mol Sci* 2014;15(10):18148–18161.
62. Liu Q et al. TPX2 as a novel prognostic biomarker for hepatocellular carcinoma. *Hepatol. Res.* 2015;45(8):906–918.
63. Wu G et al. miR-372 down-regulates the oncogene ATAD2 to influence hepatocellular carcinoma proliferation and metastasis. *BMC Cancer* 2014;14:107.
64. Wu G et al. Epigenetic high regulation of ATAD2 regulates the Hh pathway in human hepatocellular carcinoma. *Int. J. Oncol.* 2014;45(1):351–361.
65. Hwang HW, Ha SY, Bang H, Park C-K. ATAD2 as a Poor Prognostic Marker for Hepatocellular Carcinoma after Curative Resection. *Cancer Res Treat* 2015;47(4):853–861.
66. Lee J-S et al. Classification and prediction of survival in hepatocellular carcinoma by gene expression profiling. *Hepatology* 2004;40(3):667–676.
67. Lee CF et al. Genomic-wide analysis of lymphatic metastasis-associated genes in human hepatocellular carcinoma. *World J. Gastroenterol.* 2009;15(3):356–365.
68. Hirasaki S, Koide N, Ujike K, Shinji T, Tsuji T. Expression of Nov, CYR61 and CTGF genes in human hepatocellular carcinoma. *Hepatol. Res.* 2001;19(3):294–305.
69. Zeng Z-J, Yang L-Y, Ding X, Wang W. Expressions of cysteine-rich61, connective tissue growth factor and Nov genes in hepatocellular carcinoma and their clinical significance. *World J. Gastroenterol.* 2004;10(23):3414–3418.
70. Feng P, Wang B, Ren EC. Cyr61/CCN1 is a tumor suppressor in human hepatocellular carcinoma and involved in DNA damage response. *Int. J. Biochem. Cell Biol.* 2008;40(1):98–109.

71. Palaiologou M, Koskinas J, Karanikolas M, Fatourou E, Tiniakos DG. E2F-1 is overexpressed and pro-apoptotic in human hepatocellular carcinoma. *Virchows Arch.* 2012;460(5):439–446.
72. Chen Y-L et al. The E2F transcription factor 1 transactivates stathmin 1 in hepatocellular carcinoma. *Ann. Surg. Oncol.* 2013;20(12):4041–4054.
73. Lee J-S et al. Classification and prediction of survival in hepatocellular carcinoma by gene expression profiling. *Hepatology* 2004;40(3):667–676.
74. Yang JD et al. Genes associated with recurrence of hepatocellular carcinoma: integrated analysis by gene expression and methylation profiling. *J. Korean Med. Sci.* 2011;26(11):1428–1438.
75. Satow R et al. Combined functional genome survey of therapeutic targets for hepatocellular carcinoma. *Clin. Cancer Res.* 2010;16(9):2518–2528.
76. Hsieh S-Y et al. Stathmin1 overexpression associated with polyploidy, tumor-cell invasion, early recurrence, and poor prognosis in human hepatoma. *Mol. Carcinog.* 2010;49(5):476–487.
77. Wong N et al. TOP2A overexpression in hepatocellular carcinoma correlates with early age onset, shorter patients survival and chemoresistance. *Int. J. Cancer* 2009;124(3):644–652.
78. Panvichian R, Tantiwetrueangdet A, Angkathunyakul N, Leelaudomlipi S. TOP2A amplification and overexpression in hepatocellular carcinoma tissues. *Biomed Res Int* 2015;2015:381602.
79. Xu W, Huang H, Yu L, Cao L. Meta-analysis of gene expression profiles indicates genes in spliceosome pathway are up-regulated in hepatocellular carcinoma (HCC). *Med. Oncol.* 2015;32(4):96.
80. Mudbhary R et al. UHRF1 overexpression drives DNA hypomethylation and hepatocellular carcinoma. *Cancer Cell* 2014;25(2):196–209.
81. Liang D et al. Elevated expression of UHRF1 predicts unfavorable prognosis for patients with hepatocellular carcinoma. *Int J Clin Exp Pathol* 2015;8(8):9416–9421.
82. Lv Z et al. The suppressive role and aberrant promoter methylation of BTG3 in the progression of hepatocellular carcinoma. *PLoS ONE* 2013;8(10):e77473.

83. Zhao J et al. The role of CDK1 in apoptin-induced apoptosis in hepatocellular carcinoma cells. *Oncol. Rep.* 2013;30(1):253–259.
84. Ito Y et al. Expression and prognostic roles of the G1-S modulators in hepatocellular carcinoma: p27 independently predicts the recurrence. *Hepatology* 1999;30(1):90–99.
85. Qin LF, Ng IO. Expression of p27(KIP1) and p21(WAF1/CIP1) in primary hepatocellular carcinoma: clinicopathologic correlation and survival analysis. *Hum. Pathol.* 2001;32(8):778–784.
86. Marhenke S et al. p21 promotes sustained liver regeneration and hepatocarcinogenesis in chronic cholestatic liver injury. *Gut* 2014;63(9):1501–1512.
87. Morishita A et al. Reduced expression of cell cycle regulator p18(INK4C) in human hepatocellular carcinoma. *Hepatology* 2004;40(3):677–686.
88. Gao Y, Li Z, Guo X, Liu Y, Zhang K. DLX4 as a prognostic marker for hepatocellular carcinoma. *Neoplasma* 2014;61(3):318–323.
89. Yang B et al. Higher intratumor than peritumor expression of DUSP6/MKP-3 is associated with recurrence after curative resection of hepatocellular carcinoma. *Chin. Med. J.* 2014;127(7):1211–1217.
90. Cui X-D et al. EFNA1 ligand and its receptor EphA2: potential biomarkers for hepatocellular carcinoma. *Int. J. Cancer* 2010;126(4):940–949.
91. Wada H et al. Association between ephrin-A1 mRNA expression and poor prognosis after hepatectomy to treat hepatocellular carcinoma. *Int. J. Oncol.* 2014;45(3):1051–1058.
92. Hao M-W et al. Transcription factor EGR-1 inhibits growth of hepatocellular carcinoma and esophageal carcinoma cell lines. *World J. Gastroenterol.* 2002;8(2):203–207.
93. Behnke M, Reimers M, Fisher R. The expression of embryonic liver development genes in hepatitis C induced cirrhosis and hepatocellular carcinoma. *Cancers (Basel)* 2012;4(3):945–968.
94. Giovannini C et al. CDKN1C/P57 is regulated by the Notch target gene Hes1 and induces senescence in human hepatocellular carcinoma. *Am. J. Pathol.* 2012;181(2):413–422.

95. He X et al. Upregulation of hyaluronan-mediated motility receptor in hepatocellular carcinoma predicts poor survival. *Oncol Lett* 2015;10(6):3639–3646.
96. Yang Z et al. Upregulation of heat shock proteins (HSPA12A, HSP90B1, HSPA4, HSPA5 and HSPA6) in tumour tissues is associated with poor outcomes from HBV-related early-stage hepatocellular carcinoma. *Int J Med Sci* 2015;12(3):256–263.
97. Yang X-R et al. High expression levels of putative hepatic stem/progenitor cell biomarkers related to tumour angiogenesis and poor prognosis of hepatocellular carcinoma. *Gut* 2010;59(7):953–962.
98. Namikawa M et al. Expression of amino acid transporters (LAT1, ASCT2 and xCT) as clinical significance in hepatocellular carcinoma. *Hepatol. Res.* [published online ahead of print: October 9, 2014]; doi:10.1111/hepr.12431
99. Kindrat I et al. MicroRNA-152-mediated dysregulation of hepatic transferrin receptor 1 in liver carcinogenesis. *Oncotarget* 2016;7(2):1276–1287.
100. Huang Y, Fan X, Qiu F, Wang Z. Genomics of hepatitis B virus-related hepatocellular carcinoma and adjacent noncancerous tissues with cDNA microarray. *Chin. Med. J.* 2011;124(13):2057–2064.
101. Lu C et al. Increased  $\alpha$ -tubulin1b expression indicates poor prognosis and resistance to chemotherapy in hepatocellular carcinoma. *Dig. Dis. Sci.* 2013;58(9):2713–2720.
102. Lee J-S et al. 24. Lei B, Chai W, Wang Z, Liu R. Highly expressed UNC119 promotes hepatocellular carcinoma cell proliferation through Wnt/ $\beta$ -catenin signaling and predicts a poor prognosis. *Am J Cancer Res* 2015;5(10):3123–3134.
103. Yagyu R et al. Isolation and characterization of a novel human gene, VANGL1, as a therapeutic target for hepatocellular carcinoma. *Int. J. Oncol.* 2002;20(6):1173–1178.

## Supplemental Figure 1

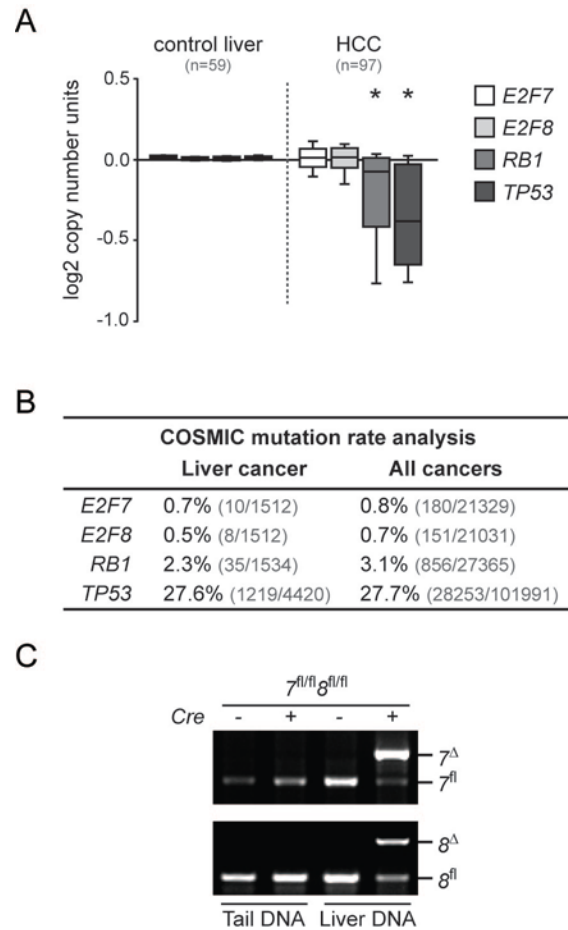

## Supplemental Figure 1

- A. Box plots illustrating copy number variations in E2F pathway genes in normal and HCC liver samples using the TCGA database. The center lines in boxes represent the median. \*,  $P < 0.001$ ; two-sided Student's *t*-test vs. control liver. n indicates the number of patients in each group.
- B. Mutation frequency analysis of E2F pathway genes in liver cancer and all cancers using the COSMIC database. Percent of samples with mutation, number of samples with mutation and total sample number are displayed for each gene.
- C. PCR genotyping showing deletion of *E2f7* and *E2f8* in the liver by *Albumin-cre*. DNA was isolated from the tail and liver of *cre- 7<sup>fl/fl</sup> 8<sup>fl/fl</sup>* and *cre+ 7<sup>fl/fl</sup> 8<sup>fl/fl</sup>* mice and PCR was performed for *E2f7* ( $7^{fl}$ ; 340bp and  $7^{\Delta}$ ; 400bp) and *E2f8* ( $8^{fl}$ ; 230bp and  $8^{\Delta}$ ; 500bp).

## Supplemental Figure 2

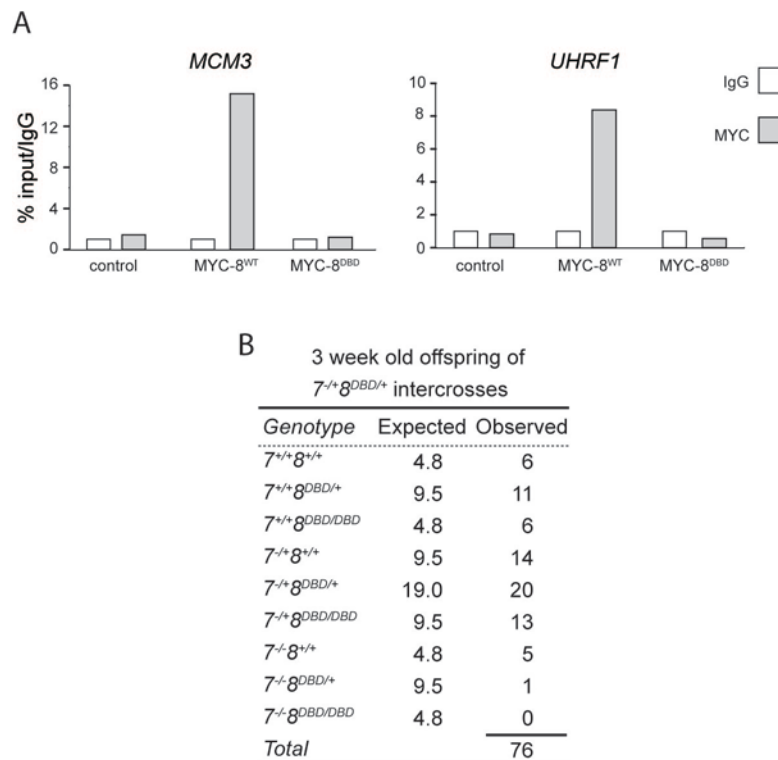

## Supplemental Figure 2

(A) ChIP-qPCR validation using IgG or MYC antibodies in HepG2 cells (control) or HepG2 cells expressing 5xMYC tagged wildtype E2F8 (MYC8<sup>WT</sup>) or 5xMYC tagged DBD E2F8 (MYC8<sup>DBD</sup>). *MCM3* and *UHRF1* are established E2F targets; *TUBA4A* is shown as a negative control. Percent of input values for MYC-tagged E2F8 were normalized to IgG.

(B) Table showing the ratios of expected and observed genotypes of mice surviving to 3 weeks of age.

Ten litters from  $7^{-/+}8^{DBD/+} \times 7^{-/+}8^{DBD/+}$  crosses were examined.



**Supplemental Figure 3**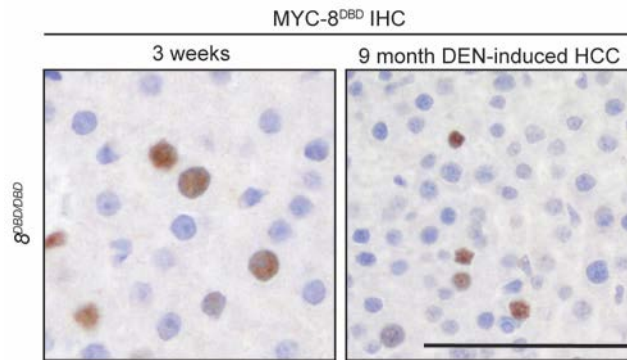**Supplemental Figure 3**

Immunohistochemistry for MYC recognizing the 5xMYC tagged E2F8<sup>DBD</sup> protein (MYC-8<sup>DBD</sup>) in livers from *E2f8<sup>DBD/DBD</sup>* mice showing the similar intensity of E2F8 staining in hepatocytes from 3 week old mice and HCC cells from 9 month old DEN-treated mice. Scale bar, 50  $\mu$ m

Supplemental Figure 4

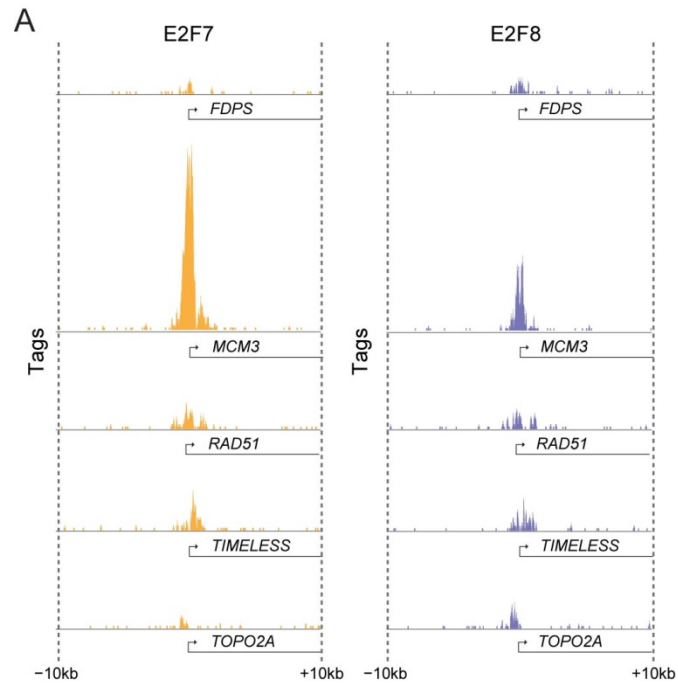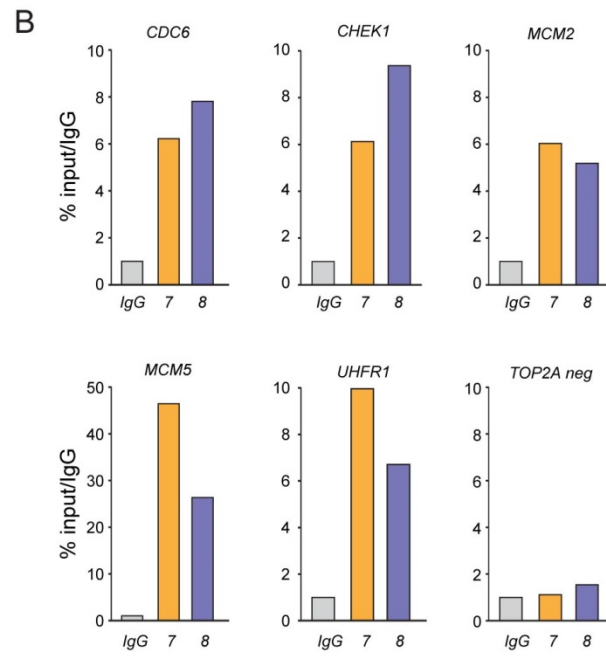

#### Supplemental Figure 4

(A) Examples of the promoter occupancy of E2Fs on selected gene promoters.

(B) ChIP-qPCR validation using IgG, E2F7 or E2F8 antibody's in THLE-2 cells to measure E2F7 and E2F8 on selected target promoters (*CDC6*, *CHEK1*, *MCM2*, *MCM5*, and *UHRF1*). A non-promoter region of *TOP2A* (*TOP2A neg*) was used as a negative control. % input values were normalized to IgG. Primers were designed to amplify ChIP-seq identified peak regions.

Supplemental Figure 5

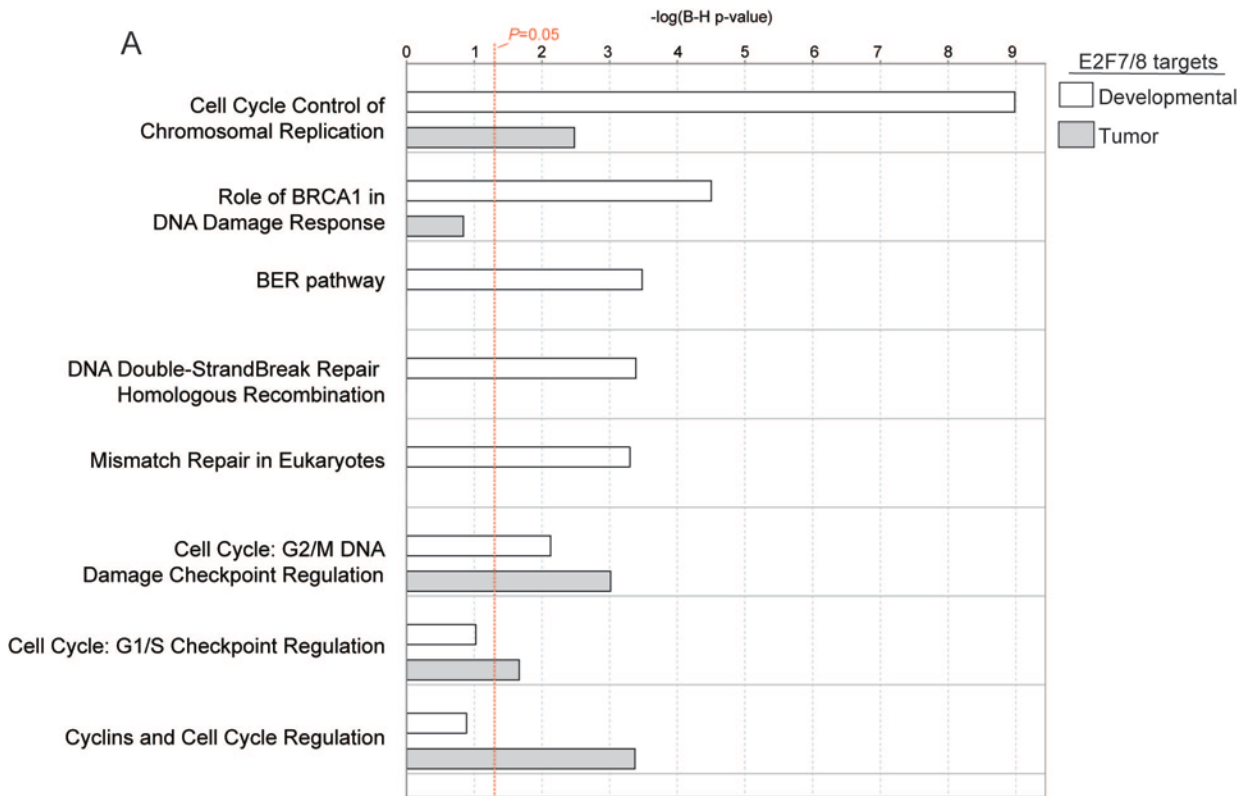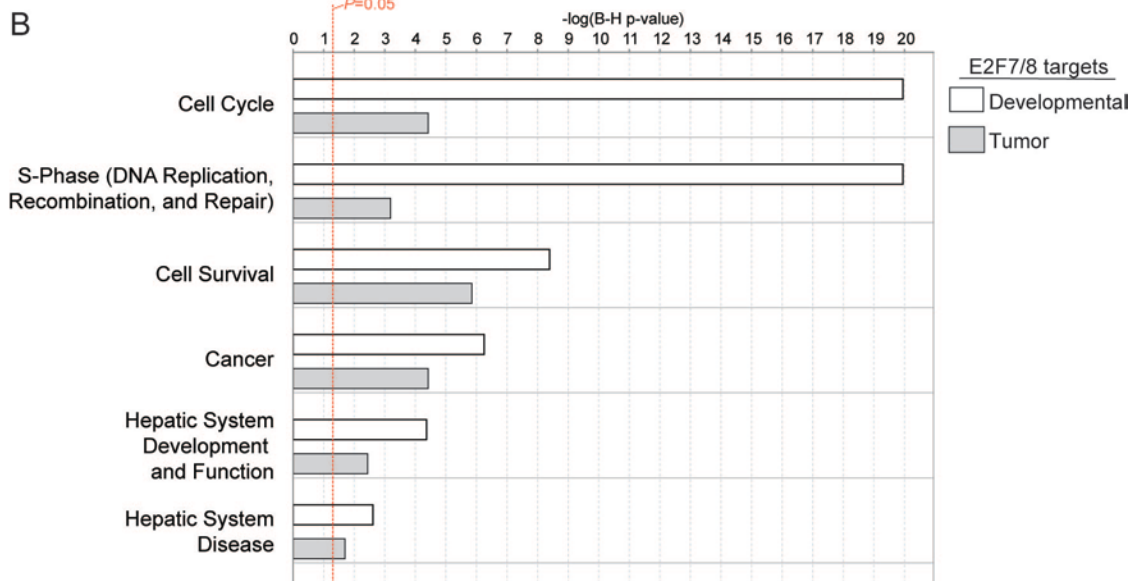

**Supplemental Figure 5**

- A. Gene ontology using Ingenuity pathway analysis (IPA) software depicts the estimated contribution of E2F7/8 targets to functions related to canonical pathway involved in cell cycle, DNA repair and checkpoint control. Bars indicate the Benjamini-Hochberg adjusted  $P$ -value, the threshold of  $P=0.05$  is shown.
- B. Gene ontology using Ingenuity pathway analysis (IPA) software depicts the estimated contribution of E2F7/8 targets to functions related to cell cycle, cancer and liver disease. Bars indicate the Benjamini-Hochberg adjusted  $P$ -value, the threshold of  $P=0.05$  is shown.

### Supplemental Figure 6

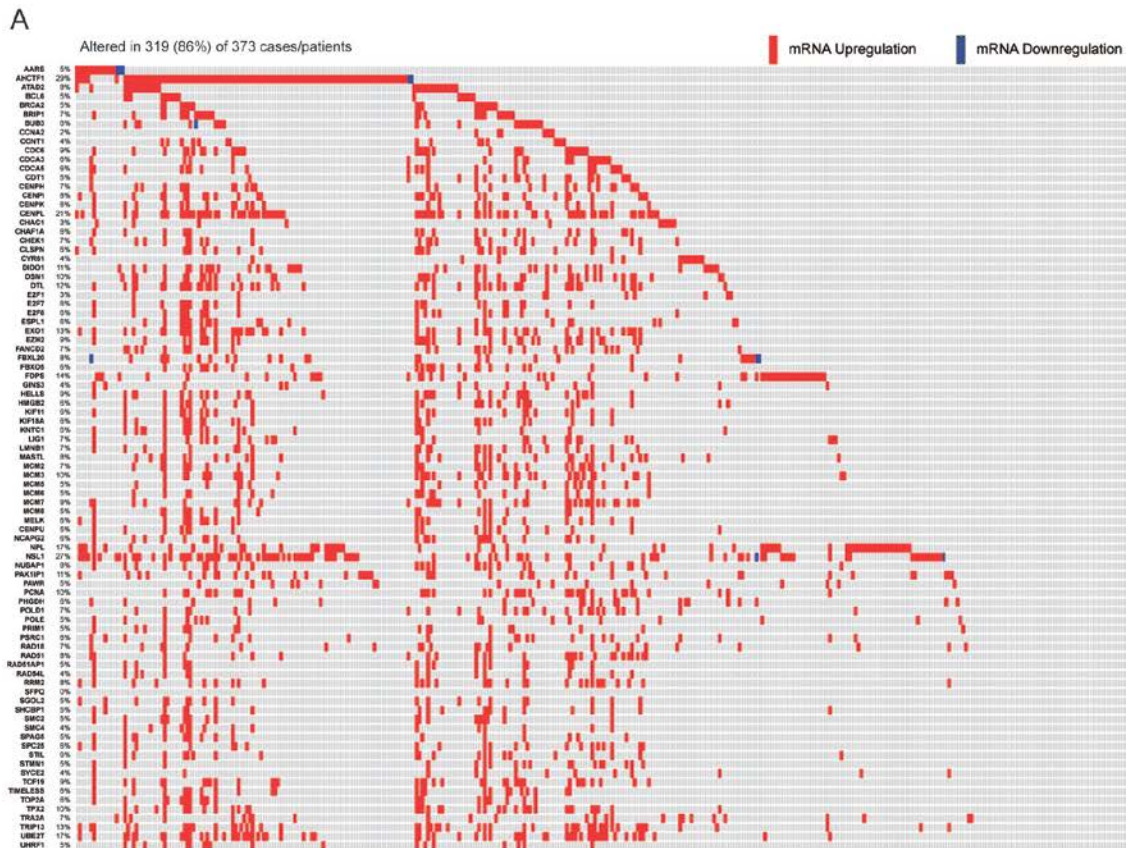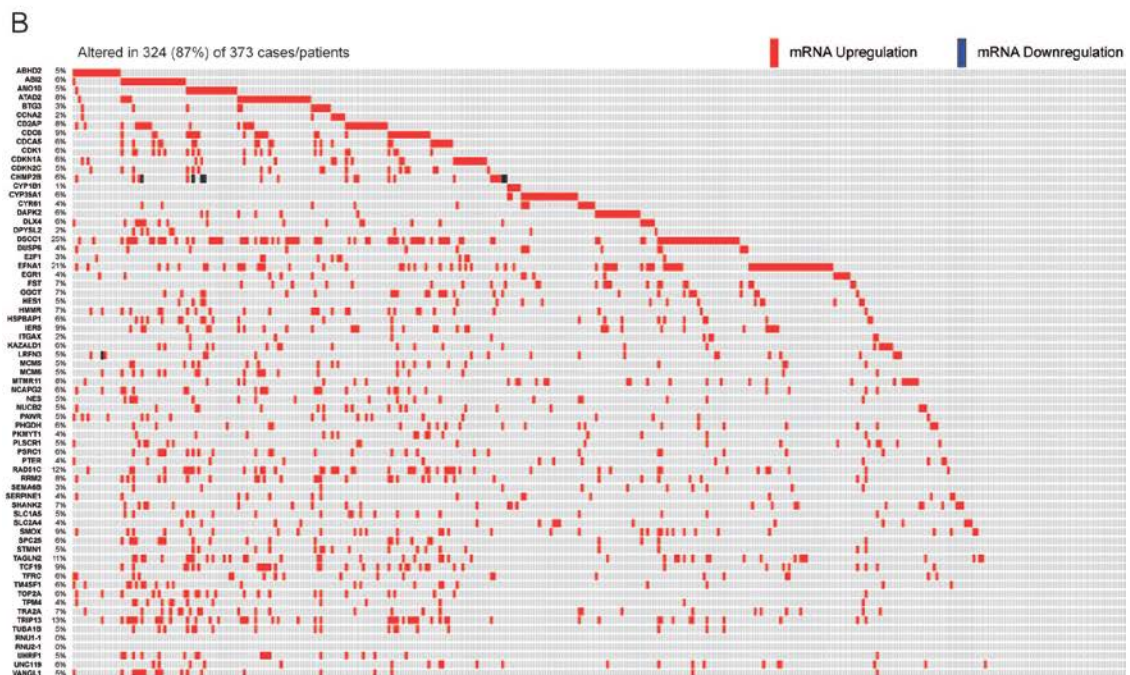

**Supplemental Figure 6**

- A. Map the expression of 88 E2F7/8 developmental associated targets in TCGA human HCC samples. Percent indicates the percent of tumors with upregulated (red boxes) or downregulated (blue boxes) mRNA expression of the indicated gene.
- B. Map the expression of 69 E2F7/8 tumor associated targets in TCGA human HCC samples. Percent indicates the percent of tumors with upregulated (red boxes) or downregulated (blue boxes) mRNA expression of the indicated gene.

**Supplemental Table 1: Genes with significant occupancy of E2F7 at the promoter regions (-5kb to +2kb)**

| Gene Symbol   | Ensembl ID      | Chromosome | Start     | End       | distance from TSS |
|---------------|-----------------|------------|-----------|-----------|-------------------|
| CTC-276P9.3   | ENST00000509530 | chr5       | 134471889 | 134471890 | -4952             |
| GFI1B         | ENST00000450530 | chr9       | 135849283 | 135849284 | -4814             |
| EIF3FP1       | ENST00000414503 | chr21      | 11186617  | 11186618  | -4804             |
| CTBP2P1       | ENST00000431853 | chrY       | 58996746  | 58996747  | -4644             |
| RP11-774O3.2  | ENST00000509453 | chr4       | 8317512   | 8317513   | -4390             |
| AC136932.2    | ENST00000583871 | chr16      | 33950346  | 33950347  | -4327             |
| ROCK1P1       | ENST00000576266 | chr18      | 108226    | 108227    | -4140             |
| IGF2BP3       | ENST00000258729 | chr7       | 23514186  | 23514187  | -4102             |
| DUX4L16       | ENST00000555130 | chrY       | 13458630  | 13458631  | -3963             |
| RP11-241F15.3 | ENST00000514077 | chr4       | 49514765  | 49514766  | -3944             |
| BRCA1         | ENST00000412061 | chr17      | 41251805  | 41251806  | -3924             |
| UPP1          | ENST00000416681 | chr7       | 48124509  | 48124510  | -3715             |
| RP11-886I11.4 | ENST00000557448 | chrY       | 13484590  | 13484591  | -3414             |
| AC008132.1    | ENST00000342888 | chr22      | 18718162  | 18718163  | -3264             |
| RP11-886I11.3 | ENST00000553347 | chrY       | 13474066  | 13474067  | -3166             |
| 7SK           | ENST00000362961 | chr1       | 55845657  | 55845658  | -3134             |
| AC073464.11   | ENST00000429823 | chr2       | 95475143  | 95475144  | -2948             |
| AL441988.1    | ENST00000408392 | chr20      | 29634568  | 29634569  | -2593             |
| RP11-886I11.4 | ENST00000557448 | chrY       | 13485432  | 13485433  | -2572             |
| C14orf164     | ENST00000430154 | chr14      | 23707174  | 23707175  | -2380             |
| RP11-886I11.2 | ENST00000557360 | chrY       | 13468248  | 13468249  | -2348             |
| RP11-886I11.3 | ENST00000553347 | chrY       | 13475061  | 13475062  | -2171             |
| Metazoa_SRP   | ENST00000581926 | chr19      | 11575920  | 11575921  | -2170             |
| RP11-886I11.3 | ENST00000553347 | chrY       | 13475289  | 13475290  | -1943             |
| LINC00273     | ENST00000567668 | chr16      | 33959031  | 33959032  | -1918             |
| CUX1          | ENST00000437600 | chr7       | 101457300 | 101457301 | -1918             |
| RRM2          | ENST00000360566 | chr2       | 10260546  | 10260547  | -1908             |
| CDC27P2       | ENST00000425026 | chrY       | 10031775  | 10031776  | -1870             |
| AC136932.1    | ENST00000385251 | chr16      | 33959879  | 33959880  | -1772             |
| ROCK1P1       | ENST00000576266 | chr18      | 110619    | 110620    | -1747             |
| PRDM7         | ENST00000407825 | chr16      | 90144039  | 90144040  | -1703             |
| RP11-241F15.3 | ENST00000514077 | chr4       | 49512355  | 49512356  | -1534             |
| DUX4L16       | ENST00000555130 | chrY       | 13461074  | 13461075  | -1519             |
| DND1P1        | ENST00000580842 | chr17      | 43661746  | 43661747  | -1490             |
| RP11-434D2.11 | ENST00000583797 | chr17      | 20460247  | 20460248  | -1377             |
| ANKRD30BL     | ENST00000470729 | chr2       | 133016886 | 133016887 | -1346             |
| SENP5         | ENST00000489744 | chr3       | 196625655 | 196625656 | -1254             |
| LTBP4         | ENST00000595529 | chr19      | 41111131  | 41111132  | -1240             |
| PPEF2         | ENST00000513324 | chr4       | 76807208  | 76807209  | -1234             |
| HCN3          | ENST00000368358 | chr1       | 155246150 | 155246151 | -1223             |



**Supplemental Table 1: Genes with significant occupancy of E2F7 at the promoter regions (-5kb to +2kb)**

| Gene Symbol      | Ensembl ID      | Chromosome | Start     | End       | distance from TSS |
|------------------|-----------------|------------|-----------|-----------|-------------------|
| RP11-886I11.2    | ENST00000557360 | chrY       | 13469409  | 13469410  | -1187             |
| FOXK2            | ENST00000575578 | chr17      | 80542822  | 80542823  | -1183             |
| AC087491.2       | ENST00000398554 | chr17      | 37774739  | 37774740  | -1126             |
| PFKFB4           | ENST00000412035 | chr3       | 48595542  | 48595543  | -1094             |
| SCUBE2           | ENST00000534295 | chr11      | 9160738   | 9160739   | -1079             |
| POU2F1           | ENST00000367866 | chr1       | 167189039 | 167189040 | -1026             |
| CDC27P1          | ENST00000445384 | chr2       | 133018924 | 133018925 | -976              |
| PLEKHH3          | ENST00000412503 | chr17      | 40830008  | 40830009  | -962              |
| ATAD3A           | ENST00000378756 | chr1       | 1446598   | 1446599   | -932              |
| CR848007.2       | ENST00000442354 | chr9       | 44070759  | 44070760  | -880              |
| ANKRD30BL        | ENST00000470729 | chr2       | 133016419 | 133016420 | -879              |
| PRR24            | ENST00000552360 | chr19      | 47777267  | 47777268  | -874              |
| RP11-313F23.4    | ENST00000545923 | chr12      | 34372644  | 34372645  | -858              |
| UHRF1            | ENST00000591733 | chr19      | 4908598   | 4908599   | -843              |
| XXbac-BPG308K3.6 | ENST00000440244 | chr6       | 28831956  | 28831957  | -831              |
| CCNE1            | ENST00000262643 | chr19      | 30302008  | 30302009  | -796              |
| AL928970.1       | ENST00000597269 | chr9       | 10312     | 10313     | -743              |
| BAZ1B            | ENST00000404251 | chr7       | 72937338  | 72937339  | -732              |
| VEGFA            | ENST00000476772 | chr6       | 43737208  | 43737209  | -712              |
| RNU5E-6P         | ENST00000365574 | chr1       | 45286350  | 45286351  | -683              |
| LINC00273        | ENST00000539813 | chr16      | 33963142  | 33963143  | -641              |
| RP11-886I11.2    | ENST00000557360 | chrY       | 13469977  | 13469978  | -619              |
| FAM222A          | ENST00000538780 | chr12      | 110151435 | 110151436 | -597              |
| RP11-631N16.2    | ENST00000550290 | chr12      | 62995962  | 62995963  | -569              |
| RP11-423C15.3    | ENST00000444800 | chr9       | 128508573 | 128508574 | -556              |
| SIVA1            | ENST00000329967 | chr14      | 105218904 | 105218905 | -532              |
| SIK2             | ENST00000304987 | chr11      | 111472586 | 111472587 | -528              |
| RP1-85F18.5      | ENST00000420537 | chr22      | 41593981  | 41593982  | -523              |
| SPEN             | ENST00000375759 | chr1       | 16173844  | 16173845  | -514              |
| PIM1             | ENST00000373509 | chr6       | 37137469  | 37137470  | -509              |
| AP3D1            | ENST00000591284 | chr19      | 2164969   | 2164970   | -507              |
| CAMK2N2          | ENST00000296238 | chr3       | 183979750 | 183979751 | -501              |
| MSH6             | ENST00000445503 | chr2       | 48009736  | 48009737  | -484              |
| CXorf58          | ENST00000379211 | chrX       | 23925443  | 23925444  | -474              |
| PRR24            | ENST00000552360 | chr19      | 47777668  | 47777669  | -473              |
| AMIGO1           | ENST00000369862 | chr1       | 110052827 | 110052828 | -469              |
| ANXA4            | ENST00000394295 | chr2       | 69968640  | 69968641  | -465              |
| C6orf99          | ENST00000367073 | chr6       | 159290489 | 159290490 | -464              |
| ATOX1            | ENST00000524142 | chr5       | 151152541 | 151152542 | -450              |
| ZMYND19          | ENST00000298585 | chr9       | 140485389 | 140485390 | -449              |

**Supplemental Table 1: Genes with significant occupancy of E2F7 at the promoter regions (-5kb to +2kb)**

| <b>Gene Symbol</b> | <b>Ensembl ID</b> | <b>Chromosome</b> | <b>Start</b> | <b>End</b> | <b>distance from TSS</b> |
|--------------------|-------------------|-------------------|--------------|------------|--------------------------|
| RP11-386G11.10     | ENST00000547712   | chr12             | 49524505     | 49524506   | -448                     |
| PPM1D              | ENST00000305921   | chr17             | 58677118     | 58677119   | -425                     |
| SETX               | ENST00000224140   | chr9              | 135230792    | 135230793  | -422                     |
| BRI3BP             | ENST00000341446   | chr12             | 125477828    | 125477829  | -417                     |
| E2F7               | ENST00000322886   | chr12             | 77459766     | 77459767   | -408                     |
| SERTAD4-AS1        | ENST00000475406   | chr1              | 210406718    | 210406719  | -403                     |
| HCN3               | ENST00000368358   | chr1              | 155246973    | 155246974  | -400                     |
| LINC00273          | ENST00000567668   | chr16             | 33957497     | 33957498   | -384                     |
| FCHSD2             | ENST00000409418   | chr11             | 72853676     | 72853677   | -372                     |
| SLC25A36           | ENST00000446041   | chr3              | 140660305    | 140660306  | -366                     |
| STIL               | ENST00000337817   | chr1              | 47780182     | 47780183   | -365                     |
| AGFG2              | ENST00000430857   | chr7              | 100136468    | 100136469  | -365                     |
| CHAMP1             | ENST00000361283   | chr13             | 115079623    | 115079624  | -364                     |
| FKBPL              | ENST00000375156   | chr6              | 32098429     | 32098430   | -363                     |
| IGSF8              | ENST00000448417   | chr1              | 160069092    | 160069093  | -361                     |
| DNAJC9-AS1         | ENST00000440197   | chr10             | 75006585     | 75006586   | -360                     |
| KIF2A              | ENST00000401507   | chr5              | 61601631     | 61601632   | -357                     |
| SUZ12P             | ENST00000497969   | chr17             | 29058376     | 29058377   | -347                     |
| C3orf37            | ENST00000509042   | chr3              | 128997325    | 128997326  | -345                     |
| ARHGEF40           | ENST00000298694   | chr14             | 21538085     | 21538086   | -343                     |
| AEN                | ENST00000332810   | chr15             | 89164186     | 89164187   | -340                     |
| E2F3               | ENST00000346618   | chr6              | 20402057     | 20402058   | -340                     |
| HNRNPA0            | ENST00000314940   | chr5              | 137090372    | 137090373  | -335                     |
| GBAP1              | ENST00000313929   | chr1              | 155197546    | 155197547  | -334                     |
| RFX1               | ENST00000589239   | chr19             | 14117461     | 14117462   | -329                     |
| RP11-59H1.3        | ENST00000540583   | chr12             | 12878522     | 12878523   | -328                     |
| SCML1              | ENST00000380045   | chrX              | 17755261     | 17755262   | -326                     |
| CD44               | ENST00000263398   | chr11             | 35160092     | 35160093   | -324                     |
| ZBTB5              | ENST00000307750   | chr9              | 37465716     | 37465717   | -322                     |
| RBFOX1             | ENST00000570626   | chr16             | 7559802      | 7559803    | -321                     |
| PLEKHH3            | ENST00000412503   | chr17             | 40829365     | 40829366   | -319                     |
| UXT                | ENST00000333119   | chrX              | 47518875     | 47518876   | -317                     |
| XPO1               | ENST00000443240   | chr2              | 61766071     | 61766072   | -312                     |
| PHF20              | ENST00000461122   | chr20             | 34359586     | 34359587   | -309                     |
| FDXR               | ENST00000442102   | chr17             | 72869462     | 72869463   | -308                     |
| EGR1               | ENST00000239938   | chr5              | 137800871    | 137800872  | -307                     |
| BANP               | ENST00000286122   | chr16             | 87984733     | 87984734   | -304                     |
| TRIM26             | ENST00000453195   | chr6              | 30181502     | 30181503   | -300                     |
| PDE4DIP            | ENST00000479408   | chr1              | 144932849    | 144932850  | -299                     |
| EEF1G              | ENST00000532986   | chr11             | 62341853     | 62341854   | -297                     |

**Supplemental Table 1: Genes with significant occupancy of E2F7 at the promoter regions (-5kb to +2kb)**

| Gene Symbol | Ensembl ID      | Chromosome | Start     | End       | distance from TSS |
|-------------|-----------------|------------|-----------|-----------|-------------------|
| TCAM1P      | ENST00000463377 | chr17      | 61926355  | 61926356  | -296              |
| PMM1        | ENST00000216259 | chr22      | 41986188  | 41986189  | -296              |
| IRS2        | ENST00000375856 | chr13      | 110439208 | 110439209 | -295              |
| PDS5A       | ENST00000303538 | chr4       | 39979867  | 39979868  | -293              |
| CSTF2T      | ENST00000331173 | chr10      | 53459642  | 53459643  | -289              |
| SUZ12       | ENST00000322652 | chr17      | 30263752  | 30263753  | -284              |
| TTC33       | ENST00000337702 | chr5       | 40756355  | 40756356  | -280              |
| ARL15       | ENST00000502271 | chr5       | 53606689  | 53606690  | -279              |
| SMC3        | ENST00000361804 | chr10      | 112327170 | 112327171 | -278              |
| RIC8B       | ENST00000392837 | chr12      | 107168096 | 107168097 | -276              |
| SRSF1       | ENST00000258962 | chr17      | 56084981  | 56084982  | -276              |
| DEK         | ENST00000397239 | chr6       | 18265324  | 18265325  | -272              |
| SPOP        | ENST00000504102 | chr17      | 47755865  | 47755866  | -271              |
| AP1S2       | ENST00000329235 | chrX       | 15873323  | 15873324  | -271              |
| SLC1A5      | ENST00000542575 | chr19      | 47292117  | 47292118  | -268              |
| RBM14       | ENST00000310137 | chr11      | 66383786  | 66383787  | -266              |
| HLTF        | ENST00000494055 | chr3       | 148804604 | 148804605 | -265              |
| TMPO-AS1    | ENST00000548760 | chr12      | 98910462  | 98910463  | -264              |
| CD3EAP      | ENST00000309424 | chr19      | 45909208  | 45909209  | -258              |
| LEMD3       | ENST00000308330 | chr12      | 65563093  | 65563094  | -257              |
| TMX1        | ENST00000555574 | chr14      | 51706622  | 51706623  | -257              |
| FAM161A     | ENST00000405894 | chr2       | 62081531  | 62081532  | -255              |
| AC069277.2  | ENST00000342990 | chr3       | 6549216   | 6549217   | -251              |
| TBC1D1      | ENST00000446803 | chr4       | 37978682  | 37978683  | -248              |
| MCM4        | ENST00000523944 | chr8       | 48873213  | 48873214  | -244              |
| UHRF1       | ENST00000591733 | chr19      | 4909198   | 4909199   | -243              |
| RALGAPA2    | ENST00000202677 | chr20      | 20693505  | 20693506  | -241              |
| HIST1H4A    | ENST00000359907 | chr6       | 26021665  | 26021666  | -241              |
| EZH2        | ENST00000536783 | chr7       | 148581652 | 148581653 | -241              |
| ANP32E      | ENST00000314136 | chr1       | 150208737 | 150208738 | -235              |
| E2F8        | ENST00000250024 | chr11      | 19262726  | 19262727  | -230              |
| EBNA1BP2    | ENST00000431635 | chr1       | 43638468  | 43638469  | -229              |
| UBE2T       | ENST00000367274 | chr1       | 202311335 | 202311336 | -229              |
| CDK5RAP2    | ENST00000491334 | chr9       | 123342675 | 123342676 | -229              |
| CDCA7L      | ENST00000406877 | chr7       | 21985928  | 21985929  | -228              |
| STRADA      | ENST00000392950 | chr17      | 61819554  | 61819555  | -226              |
| SRSF10      | ENST00000453840 | chr1       | 24307176  | 24307177  | -225              |
| SUMO1       | ENST00000392246 | chr2       | 203103552 | 203103553 | -223              |
| MLF1IP      | ENST00000281453 | chr4       | 18565507  | 18565508  | -222              |
| FAM73B      | ENST00000474534 | chr9       | 131798679 | 131798680 | -220              |

**Supplemental Table 1: Genes with significant occupancy of E2F7 at the promoter regions (-5kb to +2kb)**

| <b>Gene Symbol</b> | <b>Ensembl ID</b> | <b>Chromosome</b> | <b>Start</b> | <b>End</b> | <b>distance from TSS</b> |
|--------------------|-------------------|-------------------|--------------|------------|--------------------------|
| HNRNPUL1           | ENST00000392006   | chr19             | 41770018     | 41770019   | -217                     |
| CYR61              | ENST00000451137   | chr1              | 86046229     | 86046230   | -214                     |
| PRPS1              | ENST00000372435   | chrX              | 106871523    | 106871524  | -213                     |
| RTTN               | ENST00000255674   | chr18             | 67873391     | 67873392   | -212                     |
| ADAM15             | ENST00000473905   | chr1              | 155022831    | 155022832  | -210                     |
| CHAF1A             | ENST00000301280   | chr19             | 4402449      | 4402450    | -209                     |
| TRIM37             | ENST00000393066   | chr17             | 57184488     | 57184489   | -208                     |
| FBXL20             | ENST00000577399   | chr17             | 37558977     | 37558978   | -203                     |
| FLAD1              | ENST00000492620   | chr1              | 154955611    | 154955612  | -202                     |
| ATP5G1             | ENST00000355938   | chr17             | 46969924     | 46969925   | -202                     |
| U2                 | ENST00000411315   | chr3              | 73159941     | 73159942   | -201                     |
| U2AF2              | ENST00000450554   | chr19             | 56165312     | 56165313   | -199                     |
| TXNRD1             | ENST00000378070   | chr12             | 104682300    | 104682301  | -195                     |
| DHX40              | ENST00000251241   | chr17             | 57642690     | 57642691   | -195                     |
| SNRPC              | ENST00000244520   | chr6              | 34724988     | 34724989   | -194                     |
| RP11-544I20.2      | ENST00000359491   | chr14             | 64805508     | 64805509   | -193                     |
| OIP5-AS1           | ENST00000558945   | chr15             | 41575994     | 41575995   | -193                     |
| PHF14              | ENST00000445996   | chr7              | 11013306     | 11013307   | -192                     |
| EBP                | ENST00000276096   | chrX              | 48379997     | 48379998   | -189                     |
| COX8A              | ENST00000314133   | chr11             | 63741890     | 63741891   | -188                     |
| CDKN2D             | ENST00000335766   | chr19             | 10679921     | 10679922   | -188                     |
| MAK                | ENST00000474039   | chr6              | 10838950     | 10838951   | -188                     |
| TTLL7              | ENST00000474957   | chr1              | 84465018     | 84465019   | -187                     |
| SLC2A4             | ENST00000317370   | chr17             | 7184798      | 7184799    | -187                     |
| MCM6               | ENST00000264156   | chr2              | 136634179    | 136634180  | -185                     |
| SLBP               | ENST00000489418   | chr4              | 1714464      | 1714465    | -184                     |
| FAM111B            | ENST00000411426   | chr11             | 58874475     | 58874476   | -182                     |
| CDCA7              | ENST00000347703   | chr2              | 174219365    | 174219366  | -182                     |
| MLF1IP             | ENST00000514781   | chr4              | 185654747    | 185654748  | -181                     |
| TIPIN              | ENST00000261881   | chr15             | 66649230     | 66649231   | -178                     |
| ATAD2              | ENST00000287394   | chr8              | 124408881    | 124408882  | -178                     |
| MCM10              | ENST00000378714   | chr10             | 13203378     | 13203379   | -175                     |
| ILF3-AS1           | ENST00000591501   | chr19             | 10764691     | 10764692   | -173                     |
| CA5BP1             | ENST00000380334   | chrX              | 15693495     | 15693496   | -173                     |
| MCFD2              | ENST00000444761   | chr2              | 47169162     | 47169163   | -170                     |
| GABARAP            | ENST00000302386   | chr17             | 7146255      | 7146256    | -168                     |
| CDT1               | ENST00000562747   | chr16             | 88870851     | 88870852   | -167                     |
| AATF               | ENST00000225402   | chr17             | 35306008     | 35306009   | -166                     |
| RP11-535A19.2      | ENST00000531263   | chr11             | 75526004     | 75526005   | -164                     |
| GCDH               | ENST00000222214   | chr19             | 13001676     | 13001677   | -163                     |

**Supplemental Table 1: Genes with significant occupancy of E2F7 at the promoter regions (-5kb to +2kb)**

| <b>Gene Symbol</b> | <b>Ensembl ID</b> | <b>Chromosome</b> | <b>Start</b> | <b>End</b> | <b>distance from TSS</b> |
|--------------------|-------------------|-------------------|--------------|------------|--------------------------|
| AC093901.1         | ENST00000414886   | chr2              | 118944122    | 118944123  | -162                     |
| 7SK                | ENST00000410327   | chr9              | 34049801     | 34049802   | -162                     |
| ZNF687             | ENST00000443959   | chr1              | 151253933    | 151253934  | -160                     |
| CLCC1              | ENST00000415331   | chr1              | 109506268    | 109506269  | -159                     |
| SYDE1              | ENST00000342784   | chr19             | 15218057     | 15218058   | -156                     |
| CUEDC1             | ENST00000581391   | chr17             | 55945979     | 55945980   | -155                     |
| CDC25A             | ENST00000437972   | chr3              | 48230045     | 48230046   | -155                     |
| MLEC               | ENST00000228506   | chr12             | 121124518    | 121124519  | -153                     |
| RAB11B             | ENST00000600719   | chr19             | 8454711      | 8454712    | -153                     |
| TPD52L2            | ENST00000369927   | chr20             | 62496442     | 62496443   | -153                     |
| METTL2B            | ENST00000262432   | chr7              | 128116629    | 128116630  | -153                     |
| ABCB6              | ENST00000265316   | chr2              | 220083862    | 220083863  | -152                     |
| SCO2               | ENST00000395693   | chr22             | 50964184     | 50964185   | -151                     |
| ING3               | ENST00000315870   | chr7              | 120590651    | 120590652  | -151                     |
| CREBZF             | ENST00000490820   | chr11             | 85376294     | 85376295   | -150                     |
| ARL6IP6            | ENST00000455875   | chr2              | 153575282    | 153575283  | -150                     |
| MYL6               | ENST00000550697   | chr12             | 56551795     | 56551796   | -149                     |
| MIR17HG            | ENST00000400282   | chr13             | 91999926     | 91999927   | -147                     |
| SLC12A4            | ENST00000422611   | chr16             | 68002742     | 68002743   | -147                     |
| GPR180             | ENST00000376958   | chr13             | 95254011     | 95254012   | -145                     |
| CDC23              | ENST00000394886   | chr5              | 137549174    | 137549175  | -144                     |
| DHFR               | ENST00000508282   | chr5              | 79950061     | 79950062   | -143                     |
| DERL3              | ENST00000290730   | chr22             | 24181455     | 24181456   | -142                     |
| CEP85              | ENST00000476272   | chr1              | 26560550     | 26560551   | -140                     |
| RFWD3              | ENST00000361070   | chr16             | 74700915     | 74700916   | -138                     |
| CAMTA1             | ENST00000303635   | chr1              | 6845248      | 6845249    | -135                     |
| RP5-1074L1.1       | ENST00000449169   | chr1              | 110881921    | 110881922  | -130                     |
| RP5-1125A11.1      | ENST00000432859   | chr20             | 32581058     | 32581059   | -130                     |
| FBXL3              | ENST00000417323   | chr13             | 77601456     | 77601457   | -128                     |
| HNRNPL             | ENST00000221419   | chr19             | 39341099     | 39341100   | -128                     |
| SUV420H2           | ENST00000464185   | chr19             | 55852856     | 55852857   | -127                     |
| LTN1               | ENST00000361371   | chr21             | 30365402     | 30365403   | -127                     |
| PM20D2             | ENST00000275072   | chr6              | 89855642     | 89855643   | -126                     |
| RBM15              | ENST00000369784   | chr1              | 110881004    | 110881005  | -123                     |
| GTPBP1             | ENST00000216044   | chr22             | 39101605     | 39101606   | -122                     |
| WDYHV1             | ENST00000287387   | chr8              | 124428843    | 124428844  | -121                     |
| RNU5E-6P           | ENST00000365574   | chr1              | 45285786     | 45285787   | -119                     |
| TRA2B              | ENST00000453386   | chr3              | 185656041    | 185656042  | -119                     |
| CASP8AP2           | ENST00000552401   | chr6              | 90539493     | 90539494   | -119                     |
| GGCT               | ENST00000275428   | chr7              | 30544575     | 30544576   | -117                     |

**Supplemental Table 1: Genes with significant occupancy of E2F7 at the promoter regions (-5kb to +2kb)**

| <b>Gene Symbol</b> | <b>Ensembl ID</b> | <b>Chromosome</b> | <b>Start</b> | <b>End</b> | <b>distance from TSS</b> |
|--------------------|-------------------|-------------------|--------------|------------|--------------------------|
| WLS                | ENST00000527864   | chr1              | 68697620     | 68697621   | -114                     |
| FANCG              | ENST00000425676   | chr9              | 35079802     | 35079803   | -114                     |
| HNRNPF             | ENST00000357065   | chr10             | 43903378     | 43903379   | -113                     |
| FAM82A2            | ENST00000560905   | chr15             | 41047645     | 41047646   | -113                     |
| NOLC1              | ENST00000405356   | chr10             | 103911822    | 103911823  | -110                     |
| MED17              | ENST00000251871   | chr11             | 93517282     | 93517283   | -110                     |
| PRPF40A            | ENST00000486100   | chr2              | 153574619    | 153574620  | -110                     |
| CTB-175E5.4        | ENST00000592897   | chr17             | 42264192     | 42264193   | -109                     |
| NAP1L4             | ENST00000380542   | chr11             | 3013713      | 3013714    | -108                     |
| SEC22C             | ENST00000273156   | chr3              | 42623626     | 42623627   | -108                     |
| MBNL3              | ENST00000370844   | chrX              | 131624102    | 131624103  | -108                     |
| PSENFEN            | ENST00000587708   | chr19             | 36235907     | 36235908   | -107                     |
| BAZ1B              | ENST00000404251   | chr7              | 72936713     | 72936714   | -107                     |
| MCM5               | ENST00000216122   | chr22             | 35795949     | 35795950   | -106                     |
| AP4B1              | ENST00000369564   | chr1              | 114447925    | 114447926  | -104                     |
| HEATR6             | ENST00000184956   | chr17             | 58156392     | 58156393   | -102                     |
| ASF1B              | ENST00000263382   | chr19             | 14247867     | 14247868   | -101                     |
| RBL1               | ENST00000373664   | chr20             | 35724495     | 35724496   | -99                      |
| RMI2               | ENST00000312499   | chr16             | 11439190     | 11439191   | -97                      |
| MUM1               | ENST00000592374   | chr19             | 1354612      | 1354613    | -97                      |
| PLCXD1             | ENST00000415337   | chrX              | 200034       | 200035     | -97                      |
| RP11-806L2.5       | ENST00000584679   | chr18             | 657353       | 657354     | -96                      |
| SLC25A42           | ENST00000318596   | chr19             | 19174711     | 19174712   | -96                      |
| PAICS              | ENST00000504188   | chr4              | 57302109     | 57302110   | -95                      |
| PSMA1              | ENST00000533068   | chr11             | 14542081     | 14542082   | -92                      |
| E2F8               | ENST00000527884   | chr11             | 19263257     | 19263258   | -92                      |
| MRPL11             | ENST00000430466   | chr11             | 66206408     | 66206409   | -91                      |
| RP11-387D10.2      | ENST00000559531   | chr15             | 91260461     | 91260462   | -91                      |
| RP11-452J21.2      | ENST00000513586   | chr4              | 16180472     | 16180473   | -89                      |
| MUT                | ENST00000274813   | chr6              | 49430990     | 49430991   | -88                      |
| ZNF219             | ENST00000555697   | chr14             | 21571821     | 21571822   | -85                      |
| RP11-424C20.2      | ENST00000540175   | chr12             | 20704441     | 20704442   | -82                      |
| GMNN               | ENST00000378054   | chr6              | 24775559     | 24775560   | -81                      |
| CENPH              | ENST00000283006   | chr5              | 68485294     | 68485295   | -80                      |
| E2F2               | ENST00000361729   | chr1              | 23857789     | 23857790   | -79                      |
| GBA                | ENST00000428024   | chr1              | 155214730    | 155214731  | -79                      |
| RBM23              | ENST00000359890   | chr14             | 23388469     | 23388470   | -78                      |
| RP11-168G16.1      | ENST00000340644   | chr15             | 100890514    | 100890515  | -78                      |
| TCF19              | ENST00000376257   | chr6              | 31126240     | 31126241   | -78                      |
| DUT                | ENST00000455976   | chr15             | 48624224     | 48624225   | -75                      |

**Supplemental Table 1: Genes with significant occupancy of E2F7 at the promoter regions (-5kb to +2kb)**

| <b>Gene Symbol</b> | <b>Ensembl ID</b> | <b>Chromosome</b> | <b>Start</b> | <b>End</b> | <b>distance from TSS</b> |
|--------------------|-------------------|-------------------|--------------|------------|--------------------------|
| HIST1H4I           | ENST00000354348   | chr6              | 27107000     | 27107001   | -75                      |
| TAF6               | ENST00000453269   | chr7              | 99717092     | 99717093   | -73                      |
| OXSR1              | ENST00000492714   | chr3              | 38206509     | 38206510   | -70                      |
| BSG                | ENST00000346916   | chr19             | 571228       | 571229     | -68                      |
| SETMAR             | ENST00000358065   | chr3              | 4344919      | 4344920    | -68                      |
| RPA2               | ENST00000373909   | chr1              | 28241320     | 28241321   | -65                      |
| FANCL              | ENST00000449070   | chr2              | 58468570     | 58468571   | -65                      |
| ZNF1-AS1           | ENST00000326677   | chr20             | 47895113     | 47895114   | -65                      |
| FDPS               | ENST00000447866   | chr1              | 155278475    | 155278476  | -63                      |
| RP11-849H4.2       | ENST00000531488   | chr11             | 71639554     | 71639555   | -63                      |
| UBC                | ENST00000546120   | chr12             | 125399257    | 125399258  | -63                      |
| TICRR              | ENST00000268138   | chr15             | 90118651     | 90118652   | -61                      |
| TOP2A              | ENST00000423485   | chr17             | 38574261     | 38574262   | -61                      |
| MMAB               | ENST00000537236   | chr12             | 110011443    | 110011444  | -60                      |
| PROSER1            | ENST00000350125   | chr13             | 39612310     | 39612311   | -60                      |
| NUSAP1             | ENST00000559046   | chr15             | 41624993     | 41624994   | -59                      |
| TGOLN2             | ENST00000409232   | chr2              | 85555204     | 85555205   | -59                      |
| SPC25              | ENST00000282074   | chr2              | 169747011    | 169747012  | -58                      |
| SYNGR4             | ENST00000344846   | chr19             | 48867595     | 48867596   | -56                      |
| WEE1               | ENST00000450114   | chr11             | 9595172      | 9595173    | -55                      |
| IER2               | ENST00000588173   | chr19             | 13262733     | 13262734   | -55                      |
| CENPI              | ENST00000218507   | chrX              | 100353122    | 100353123  | -55                      |
| CTC-453G23.8       | ENST00000595201   | chr19             | 48707285     | 48707286   | -54                      |
| MSH2               | ENST00000233146   | chr2              | 47630053     | 47630054   | -54                      |
| FICD               | ENST00000552695   | chr12             | 108908908    | 108908909  | -53                      |
| GTF2A1             | ENST00000434192   | chr14             | 81687625     | 81687626   | -52                      |
| DIAPH3             | ENST00000400324   | chr13             | 60738041     | 60738042   | -51                      |
| CENPM              | ENST00000402420   | chr22             | 42342782     | 42342783   | -51                      |
| MFAP1              | ENST00000267812   | chr15             | 44117048     | 44117049   | -50                      |
| CDC7               | ENST00000430031   | chr1              | 91966358     | 91966359   | -49                      |
| IMMT               | ENST00000410111   | chr2              | 86422940     | 86422941   | -49                      |
| DIS3               | ENST00000377767   | chr13             | 73356117     | 73356118   | -48                      |
| HIST1H2AM          | ENST00000359611   | chr6              | 27861009     | 27861010   | -48                      |
| PRKCSH             | ENST00000591462   | chr19             | 11546061     | 11546062   | -47                      |
| HDAC6              | ENST00000423941   | chrX              | 48659736     | 48659737   | -47                      |
| EXO1               | ENST00000366548   | chr1              | 242011435    | 242011436  | -46                      |
| LRR1               | ENST00000540712   | chr14             | 50065623     | 50065624   | -46                      |
| CARHSP1            | ENST00000570125   | chr16             | 8962620      | 8962621    | -46                      |
| AC004854.4         | ENST00000443162   | chr7              | 44887968     | 44887969   | -46                      |
| CEP152             | ENST00000560322   | chr15             | 49103382     | 49103383   | -41                      |

**Supplemental Table 1: Genes with significant occupancy of E2F7 at the promoter regions (-5kb to +2kb)**

| <b>Gene Symbol</b> | <b>Ensembl ID</b> | <b>Chromosome</b> | <b>Start</b> | <b>End</b> | <b>distance from TSS</b> |
|--------------------|-------------------|-------------------|--------------|------------|--------------------------|
| PMAIP1             | ENST00000316660   | chr18             | 57567139     | 57567140   | -40                      |
| WDPCP              | ENST00000272321   | chr2              | 63815970     | 63815971   | -39                      |
| SNRPB              | ENST00000438552   | chr20             | 2451535      | 2451536    | -38                      |
| RNF167             | ENST00000575111   | chr17             | 4843639      | 4843640    | -36                      |
| ESYT1              | ENST00000394048   | chr12             | 56521804     | 56521805   | -35                      |
| E2F1               | ENST00000343380   | chr20             | 32274243     | 32274244   | -35                      |
| NFATC2IP           | ENST00000320805   | chr16             | 28962224     | 28962225   | -33                      |
| TRIM56             | ENST00000412507   | chr7              | 100728769    | 100728770  | -33                      |
| NUP205             | ENST00000285968   | chr7              | 135242634    | 135242635  | -32                      |
| C18orf56           | ENST00000323813   | chr18             | 658369       | 658370     | -31                      |
| MYC                | ENST00000524013   | chr8              | 128748434    | 128748435  | -31                      |
| C11orf30           | ENST00000427574   | chr11             | 76155936     | 76155937   | -30                      |
| UNG                | ENST00000336865   | chr12             | 109535893    | 109535894  | -29                      |
| PLSCR1             | ENST00000486631   | chr3              | 146262455    | 146262456  | -29                      |
| EEF1E1             | ENST00000379715   | chr6              | 8102838      | 8102839    | -29                      |
| FAM212B            | ENST00000444059   | chr1              | 112298472    | 112298473  | -28                      |
| AC079305.8         | ENST00000455416   | chr2              | 178077415    | 178077416  | -27                      |
| SNHG1              | ENST00000541416   | chr11             | 62623308     | 62623309   | -26                      |
| PAN2               | ENST00000440411   | chr12             | 56727861     | 56727862   | -26                      |
| SIN3A              | ENST00000565264   | chr15             | 75744111     | 75744112   | -26                      |
| ALDOA              | ENST00000338110   | chr16             | 30064384     | 30064385   | -26                      |
| RP11-351A11.1      | ENST00000518570   | chr6              | 119255923    | 119255924  | -26                      |
| DBR1               | ENST00000505015   | chr3              | 137893750    | 137893751  | -25                      |
| ADAL               | ENST00000428046   | chr15             | 43622847     | 43622848   | -24                      |
| HSPE1              | ENST00000409729   | chr2              | 198364839    | 198364840  | -24                      |
| HNRNPD             | ENST00000503822   | chr4              | 83295336     | 83295337   | -24                      |
| PPP1R7             | ENST00000438799   | chr2              | 242088967    | 242088968  | -23                      |
| CDK5RAP3           | ENST00000584168   | chr17             | 46048706     | 46048707   | -21                      |
| ORC2               | ENST00000234296   | chr2              | 201828422    | 201828423  | -21                      |
| ZNF367             | ENST00000375256   | chr9              | 99180630     | 99180631   | -21                      |
| DCLRE1A            | ENST00000369305   | chr10             | 115614160    | 115614161  | -20                      |
| C3orf58            | ENST00000315691   | chr3              | 143690619    | 143690620  | -20                      |
| ABHD11             | ENST00000497897   | chr7              | 73153129     | 73153130   | -20                      |
| ITGB3BP            | ENST00000271002   | chr1              | 63988903     | 63988904   | -19                      |
| POLE               | ENST00000539357   | chr12             | 133263967    | 133263968  | -18                      |
| SHKBP1             | ENST00000600552   | chr19             | 41082970     | 41082971   | -17                      |
| MSH5               | ENST00000375755   | chr6              | 31707708     | 31707709   | -16                      |
| LHX2               | ENST00000373615   | chr9              | 126773873    | 126773874  | -15                      |
| BIN1               | ENST00000466111   | chr2              | 127822515    | 127822516  | -13                      |
| MCM2               | ENST00000474964   | chr3              | 127317239    | 127317240  | -13                      |



**Supplemental Table 1: Genes with significant occupancy of E2F7 at the promoter regions (-5kb to +2kb)**

| <b>Gene Symbol</b> | <b>Ensembl ID</b> | <b>Chromosome</b> | <b>Start</b> | <b>End</b> | <b>distance from TSS</b> |
|--------------------|-------------------|-------------------|--------------|------------|--------------------------|
| RRM1               | ENST00000533349   | chr11             | 4116060      | 4116061    | -12                      |
| RFC4               | ENST00000418288   | chr3              | 186524269    | 186524270  | -11                      |
| PPOX               | ENST00000352210   | chr1              | 161136189    | 161136190  | -10                      |
| RP11-580I16.2      | ENST00000584391   | chr17             | 45726794     | 45726795   | -10                      |
| PPP1R13L           | ENST00000593226   | chr19             | 45909593     | 45909594   | -10                      |
| RQCD1              | ENST00000273064   | chr2              | 219433292    | 219433293  | -10                      |
| TFAP4              | ENST00000573476   | chr16             | 4322839      | 4322840    | -9                       |
| ATAD5              | ENST00000321990   | chr17             | 29158978     | 29158979   | -9                       |
| AC034193.5         | ENST00000326237   | chr3              | 10028585     | 10028586   | -9                       |
| EAF2               | ENST00000465664   | chr3              | 121554046    | 121554047  | -9                       |
| OGG1               | ENST00000302036   | chr3              | 9791619      | 9791620    | -8                       |
| RAD54L             | ENST00000463715   | chr1              | 46713352     | 46713353   | -7                       |
| DERA               | ENST00000428559   | chr12             | 16064098     | 16064099   | -7                       |
| BTG1               | ENST00000256015   | chr12             | 92539678     | 92539679   | -7                       |
| MTAP               | ENST00000380172   | chr9              | 21802534     | 21802535   | -7                       |
| PSMC3IP            | ENST00000587209   | chr17             | 40729718     | 40729719   | -5                       |
| RIF1               | ENST00000453091   | chr2              | 152266391    | 152266392  | -5                       |
| RP3-410C9.1        | ENST00000600225   | chr20             | 26189996     | 26189997   | -5                       |
| CLSPN              | ENST00000318121   | chr1              | 36235531     | 36235532   | -4                       |
| GABPB2             | ENST00000462520   | chr1              | 151043049    | 151043050  | -4                       |
| CDCA3              | ENST00000545368   | chr12             | 6960458      | 6960459    | -4                       |
| RECQL              | ENST00000396093   | chr12             | 21654605     | 21654606   | -4                       |
| CENPN              | ENST00000569461   | chr16             | 81040823     | 81040824   | -4                       |
| DSN1               | ENST00000438549   | chr20             | 35402175     | 35402176   | -4                       |
| PNPLA8             | ENST00000436062   | chr7              | 108166764    | 108166765  | -4                       |
| XRCC3              | ENST00000554974   | chr14             | 104181797    | 104181798  | -3                       |
| VPRBP              | ENST00000504652   | chr3              | 51534011     | 51534012   | -3                       |
| RAD51AP1           | ENST00000352618   | chr12             | 4648053      | 4648054    | -2                       |
| MTHFD1             | ENST00000555709   | chr14             | 64854756     | 64854757   | -2                       |
| SLC25A3            | ENST00000546766   | chr12             | 98987431     | 98987432   | -1                       |
| KNTC1              | ENST00000535410   | chr12             | 123011791    | 123011792  | -1                       |
| PTK2B              | ENST00000544172   | chr8              | 27168997     | 27168998   | -1                       |
| BRIP1              | ENST00000259008   | chr17             | 59940880     | 59940881   | 1                        |
| MLH1               | ENST00000457004   | chr3              | 37035006     | 37035007   | 1                        |
| PSMC3              | ENST00000298852   | chr11             | 47447985     | 47447986   | 2                        |
| ZNF384             | ENST00000319770   | chr12             | 6798524      | 6798525    | 2                        |
| LIN52              | ENST00000553404   | chr14             | 74551663     | 74551664   | 2                        |
| CNTRL              | ENST00000373865   | chr9              | 123837141    | 123837142  | 2                        |
| TMEM194A           | ENST00000379391   | chr12             | 57472542     | 57472543   | 3                        |
| ZNF524             | ENST00000589521   | chr19             | 56111389     | 56111390   | 3                        |

**Supplemental Table 1: Genes with significant occupancy of E2F7 at the promoter regions (-5kb to +2kb)**

| <b>Gene Symbol</b> | <b>Ensembl ID</b> | <b>Chromosome</b> | <b>Start</b> | <b>End</b> | <b>distance from TSS</b> |
|--------------------|-------------------|-------------------|--------------|------------|--------------------------|
| TUBB               | ENST00000396384   | chr6              | 30689477     | 30689478   | 3                        |
| TBC1D15            | ENST00000550746   | chr12             | 72233500     | 72233501   | 4                        |
| NOP58              | ENST00000488403   | chr2              | 203130461    | 203130462  | 4                        |
| RP11-159F24.1      | ENST00000503484   | chr5              | 43603034     | 43603035   | 4                        |
| DPYSL2             | ENST00000311151   | chr8              | 26435361     | 26435362   | 4                        |
| POLA1              | ENST00000379059   | chrX              | 24712066     | 24712067   | 4                        |
| CDK2               | ENST00000554619   | chr12             | 56360621     | 56360622   | 5                        |
| CTD-2339L15.1      | ENST00000533146   | chr15             | 40987288     | 40987289   | 5                        |
| RHEB               | ENST00000496004   | chr7              | 151217199    | 151217200  | 6                        |
| TK1                | ENST00000301634   | chr17             | 76183304     | 76183305   | 9                        |
| CDC6               | ENST00000577249   | chr17             | 38444167     | 38444168   | 10                       |
| AC005237.4         | ENST00000458377   | chr2              | 242003522    | 242003523  | 10                       |
| NADKD1             | ENST00000506945   | chr5              | 36242370     | 36242371   | 10                       |
| DEK                | ENST00000505224   | chr6              | 18264755     | 18264756   | 10                       |
| MMS22L             | ENST00000275053   | chr6              | 97731041     | 97731042   | 10                       |
| RFC2               | ENST00000479105   | chr7              | 73668656     | 73668657   | 10                       |
| CEP57              | ENST00000537677   | chr11             | 95523138     | 95523139   | 11                       |
| FANCD2             | ENST00000383806   | chr3              | 10068122     | 10068123   | 11                       |
| DTL                | ENST00000542077   | chr1              | 212209102    | 212209103  | 12                       |
| TFP1               | ENST00000497521   | chr3              | 133380853    | 133380854  | 12                       |
| MSH6               | ENST00000456246   | chr2              | 48010278     | 48010279   | 13                       |
| AP4M1              | ENST00000359593   | chr7              | 99699191     | 99699192   | 13                       |
| RAD51B             | ENST00000487861   | chr14             | 68286508     | 68286509   | 14                       |
| DCTPP1             | ENST00000319285   | chr16             | 30441380     | 30441381   | 15                       |
| POLD3              | ENST00000530511   | chr11             | 74303703     | 74303704   | 16                       |
| NUP155             | ENST00000231498   | chr5              | 37371266     | 37371267   | 16                       |
| POLA2              | ENST00000541089   | chr11             | 65029448     | 65029449   | 17                       |
| DDX39B             | ENST00000431908   | chr6              | 31509740     | 31509741   | 17                       |
| DDX11              | ENST00000543756   | chr12             | 31226859     | 31226860   | 18                       |
| CENPO              | ENST00000498362   | chr2              | 25016363     | 25016364   | 18                       |
| METTL2A            | ENST00000333483   | chr17             | 60501253     | 60501254   | 19                       |
| MCM3               | ENST00000596983   | chr6              | 52149659     | 52149660   | 19                       |
| FEN1               | ENST00000305885   | chr11             | 61560128     | 61560129   | 21                       |
| KIAA0101           | ENST00000558008   | chr15             | 64673615     | 64673616   | 21                       |
| HSD17B6            | ENST00000555805   | chr12             | 57145965     | 57145966   | 22                       |
| CASP2              | ENST00000350623   | chr7              | 142985564    | 142985565  | 22                       |
| HELLS              | ENST00000348459   | chr10             | 96305595     | 96305596   | 23                       |
| FAM60A             | ENST00000337682   | chr12             | 31479282     | 31479283   | 23                       |
| PRIM2              | ENST00000419977   | chr6              | 57182447     | 57182448   | 23                       |
| SOX6               | ENST00000530378   | chr11             | 16760165     | 16760166   | 24                       |

**Supplemental Table 1: Genes with significant occupancy of E2F7 at the promoter regions (-5kb to +2kb)**

| Gene Symbol   | Ensembl ID      | Chromosome | Start     | End       | distance from TSS |
|---------------|-----------------|------------|-----------|-----------|-------------------|
| ABHD2         | ENST00000352732 | chr15      | 89631403  | 89631404  | 24                |
| NUCB2         | ENST00000533738 | chr11      | 17297773  | 17297774  | 26                |
| RP11-459F6.3  | ENST00000569580 | chr16      | 58163458  | 58163459  | 27                |
| RAD51AP2      | ENST00000399080 | chr2       | 17699677  | 17699678  | 28                |
| ZRANB3        | ENST00000401392 | chr2       | 136288270 | 136288271 | 30                |
| ZBTB4         | ENST00000311403 | chr17      | 7387550   | 7387551   | 31                |
| C17orf64      | ENST00000461535 | chr17      | 58469820  | 58469821  | 32                |
| ZBTB8OS       | ENST00000479075 | chr1       | 33116469  | 33116470  | 34                |
| AK2           | ENST00000354858 | chr1       | 33502558  | 33502559  | 34                |
| SLC25A28      | ENST00000496035 | chr10      | 101380331 | 101380332 | 34                |
| CHEK1         | ENST00000534685 | chr11      | 125495934 | 125495935 | 34                |
| CTDSPL2       | ENST00000260327 | chr15      | 44719464  | 44719465  | 34                |
| RFC3          | ENST00000434425 | chr13      | 34392241  | 34392242  | 37                |
| CALM2         | ENST00000272298 | chr2       | 47403701  | 47403702  | 38                |
| RNF219        | ENST00000282003 | chr13      | 79233274  | 79233275  | 39                |
| STYK1         | ENST00000075503 | chr12      | 10826849  | 10826850  | 41                |
| RP11-68I3.7   | ENST00000584986 | chr17      | 27919217  | 27919218  | 41                |
| BTD           | ENST00000449107 | chr3       | 15643181  | 15643182  | 43                |
| HAUS8         | ENST00000598517 | chr19      | 17186187  | 17186188  | 44                |
| NR1H3         | ENST00000419652 | chr11      | 47279304  | 47279305  | 45                |
| MIS12         | ENST00000573759 | chr17      | 5389762   | 5389763   | 48                |
| MPDU1         | ENST00000572936 | chr17      | 7487033   | 7487034   | 51                |
| CDC27         | ENST00000571643 | chr17      | 45214558  | 45214559  | 51                |
| SLC46A1       | ENST00000578217 | chr17      | 26732712  | 26732713  | 52                |
| CDC45         | ENST00000438587 | chr22      | 19467058  | 19467059  | 55                |
| CCT5          | ENST00000503026 | chr5       | 10250094  | 10250095  | 55                |
| YARS          | ENST00000373477 | chr1       | 33283694  | 33283695  | 59                |
| TTI1          | ENST00000373448 | chr20      | 36661803  | 36661804  | 59                |
| CPT2          | ENST00000371486 | chr1       | 53662159  | 53662160  | 60                |
| RP11-348A11.4 | ENST00000500025 | chr11      | 33183292  | 33183293  | 60                |
| CYP1B1-AS1    | ENST00000589303 | chr2       | 38303696  | 38303697  | 60                |
| IGSF8         | ENST00000314485 | chr1       | 160068417 | 160068418 | 61                |
| GPANK1        | ENST00000456540 | chr6       | 31632899  | 31632900  | 62                |
| NR2C2AP       | ENST00000537399 | chr19      | 19314091  | 19314092  | 63                |
| PIGW          | ENST00000592983 | chr17      | 34890933  | 34890934  | 66                |
| CCNT2         | ENST00000446247 | chr2       | 135675875 | 135675876 | 66                |
| PLAUR         | ENST00000602141 | chr19      | 44172328  | 44172329  | 67                |
| DNMT1         | ENST00000592054 | chr19      | 10305226  | 10305227  | 75                |
| RP11-418J17.1 | ENST00000440150 | chr1       | 119683123 | 119683124 | 77                |
| XRCC2         | ENST00000359321 | chr7       | 152373171 | 152373172 | 78                |

**Supplemental Table 1: Genes with significant occupancy of E2F7 at the promoter regions (-5kb to +2kb)**

| Gene Symbol   | Ensembl ID      | Chromosome | Start     | End       | distance from TSS |
|---------------|-----------------|------------|-----------|-----------|-------------------|
| RNA5-8SP6     | ENST00000515896 | chrY       | 10037847  | 10037848  | 85                |
| RP4-761J14.8  | ENST00000407384 | chr12      | 6772511   | 6772512   | 87                |
| HMGB2         | ENST00000296503 | chr4       | 174256185 | 174256186 | 90                |
| TMEM116       | ENST00000437003 | chr12      | 112450823 | 112450824 | 91                |
| FANCI         | ENST00000565522 | chr15      | 89787570  | 89787571  | 91                |
| GIN53         | ENST00000318129 | chr16      | 58426387  | 58426388  | 91                |
| ZNF766        | ENST00000599581 | chr19      | 52772936  | 52772937  | 92                |
| CBX3          | ENST00000337620 | chr7       | 26240873  | 26240874  | 93                |
| HNRNPD        | ENST00000509263 | chr4       | 83294208  | 83294209  | 94                |
| CISD2         | ENST00000503643 | chr4       | 103790589 | 103790590 | 98                |
| EIF3B         | ENST00000431643 | chr7       | 2393817   | 2393818   | 98                |
| MDC1          | ENST00000376405 | chr6       | 30685356  | 30685357  | 101               |
| FANCC         | ENST00000289081 | chr9       | 98079880  | 98079881  | 103               |
| CDKN2C        | ENST00000396148 | chr1       | 51434471  | 51434472  | 106               |
| FBXO5         | ENST00000367241 | chr6       | 153304607 | 153304608 | 106               |
| USP1          | ENST00000371146 | chr1       | 62902082  | 62902083  | 109               |
| LAGE3         | ENST00000357360 | chrX       | 153707485 | 153707486 | 110               |
| SLC25A25      | ENST00000373064 | chr9       | 130860694 | 130860695 | 113               |
| 9-Sep         | ENST00000591198 | chr17      | 75277646  | 75277647  | 115               |
| SYPL1         | ENST00000011473 | chr7       | 105752905 | 105752906 | 116               |
| UHRF1         | ENST00000398240 | chr19      | 4910681   | 4910682   | 117               |
| RRM2          | ENST00000474701 | chr2       | 10263413  | 10263414  | 117               |
| RBM15         | ENST00000369784 | chr1       | 110881245 | 110881246 | 119               |
| hsa-mir-4259  | ENST00000584466 | chr1       | 159869744 | 159869745 | 124               |
| NCAPH2        | ENST00000520939 | chr22      | 50946830  | 50946831  | 126               |
| AL161626.1    | ENST00000463508 | chr9       | 79186856  | 79186857  | 127               |
| C4orf21       | ENST00000502805 | chr4       | 113557885 | 113557886 | 132               |
| HNRNPA1       | ENST00000546500 | chr12      | 54674111  | 54674112  | 136               |
| RP4-564F22.2  | ENST00000414142 | chr20      | 37063779  | 37063780  | 136               |
| SMC3          | ENST00000462899 | chr10      | 112328220 | 112328221 | 137               |
| CCNE2         | ENST00000517487 | chr8       | 95906736  | 95906737  | 141               |
| RPA3          | ENST00000462723 | chr7       | 7680063   | 7680064   | 144               |
| CHRAC1        | ENST00000519618 | chr8       | 141522230 | 141522231 | 151               |
| DDB2          | ENST00000378601 | chr11      | 47236646  | 47236647  | 155               |
| AC079949.1    | ENST00000488123 | chr12      | 127650515 | 127650516 | 156               |
| GIN52         | ENST00000253462 | chr16      | 85722442  | 85722443  | 162               |
| WDR76         | ENST00000452115 | chr15      | 44119350  | 44119351  | 166               |
| RP11-773H22.4 | ENST00000588211 | chr18      | 12991005  | 12991006  | 166               |
| RFC1          | ENST00000504849 | chr4       | 39367788  | 39367789  | 166               |
| OGT           | ENST00000444774 | chrX       | 70754316  | 70754317  | 167               |

**Supplemental Table 1: Genes with significant occupancy of E2F7 at the promoter regions (-5kb to +2kb)**

| Gene Symbol | Ensembl ID      | Chromosome | Start     | End       | distance from TSS |
|-------------|-----------------|------------|-----------|-----------|-------------------|
| MGST3       | ENST00000367889 | chr1       | 165600265 | 165600266 | 169               |
| C1orf106    | ENST00000367342 | chr1       | 200860636 | 200860637 | 169               |
| RP11-77H9.6 | ENST00000570290 | chr16      | 8963279   | 8963280   | 173               |
| AP000974.1  | ENST00000544076 | chr11      | 85565790  | 85565791  | 195               |
| PKMYT1      | ENST00000572832 | chr16      | 3018909   | 3018910   | 195               |
| LIG1        | ENST00000598938 | chr19      | 48673266  | 48673267  | 198               |
| U1          | ENST00000364829 | chr1       | 144534236 | 144534237 | 200               |
| GPD2        | ENST00000540309 | chr2       | 157293195 | 157293196 | 200               |
| ATL3        | ENST00000398868 | chr11      | 63438880  | 63438881  | 203               |
| BCL2L12     | ENST00000598306 | chr19      | 50169472  | 50169473  | 204               |
| ORC1        | ENST00000371566 | chr1       | 52869845  | 52869846  | 213               |
| MB21D1      | ENST00000370318 | chr6       | 74161768  | 74161769  | 213               |
| ZNF131      | ENST00000504359 | chr5       | 43121237  | 43121238  | 217               |
| SUCO        | ENST00000367723 | chr1       | 172501705 | 172501706 | 218               |
| ATP2A1      | ENST00000536376 | chr16      | 28891590  | 28891591  | 218               |
| TREX1       | ENST00000492235 | chr3       | 48507888  | 48507889  | 221               |
| RAVER1      | ENST00000591969 | chr19      | 10443937  | 10443938  | 229               |
| GORAB       | ENST00000464798 | chr1       | 170501544 | 170501545 | 233               |
| CNTRL       | ENST00000373855 | chr9       | 123837524 | 123837525 | 236               |
| Z83844.1    | ENST00000456099 | chr22      | 38054145  | 38054146  | 238               |
| TIMELESS    | ENST00000554616 | chr12      | 56842940  | 56842941  | 239               |
| ZNF219      | ENST00000451119 | chr14      | 21572637  | 21572638  | 243               |
| AC017099.3  | ENST00000450072 | chr2       | 98280925  | 98280926  | 247               |
| C12orf57    | ENST00000540506 | chr12      | 7053536   | 7053537   | 249               |
| DMC1        | ENST00000439567 | chr22      | 38965884  | 38965885  | 251               |
| ARGLU1      | ENST00000360629 | chr13      | 107219709 | 107219710 | 261               |
| SRSF7       | ENST00000415527 | chr2       | 38978018  | 38978019  | 261               |
| DAXX        | ENST00000446511 | chr6       | 33290318  | 33290319  | 261               |
| C4orf27     | ENST00000506125 | chr4       | 170678791 | 170678792 | 263               |
| HAT1        | ENST00000494601 | chr2       | 172779379 | 172779380 | 264               |
| HNRNPF      | ENST00000498176 | chr10      | 43891998  | 43891999  | 266               |
| BRCA2       | ENST00000530893 | chr13      | 32889913  | 32889914  | 273               |
| SCML1       | ENST00000419185 | chrX       | 17756119  | 17756120  | 276               |
| C19orf57    | ENST00000454313 | chr19      | 14016630  | 14016631  | 278               |
| NBR2        | ENST00000467245 | chr17      | 41277947  | 41277948  | 288               |
| CCNE2       | ENST00000520509 | chr8       | 95908617  | 95908618  | 288               |
| VRK2        | ENST00000428021 | chr2       | 58274307  | 58274308  | 299               |
| SMC1A       | ENST00000375340 | chrX       | 53449303  | 53449304  | 299               |
| ZCWPW1      | ENST00000360951 | chr7       | 100025979 | 100025980 | 307               |
| WDR74       | ENST00000525239 | chr11      | 62608972  | 62608973  | 308               |

**Supplemental Table 1: Genes with significant occupancy of E2F7 at the promoter regions (-5kb to +2kb)**

| <b>Gene Symbol</b> | <b>Ensembl ID</b> | <b>Chromosome</b> | <b>Start</b> | <b>End</b> | <b>distance from TSS</b> |
|--------------------|-------------------|-------------------|--------------|------------|--------------------------|
| C15orf38           | ENST00000460685   | chr15             | 90455610     | 90455611   | 308                      |
| PHLPP2             | ENST00000568954   | chr16             | 71758288     | 71758289   | 315                      |
| CDC27              | ENST00000576484   | chr17             | 45234314     | 45234315   | 318                      |
| ZNF784             | ENST00000591479   | chr19             | 56135608     | 56135609   | 323                      |
| SKA2               | ENST00000583380   | chr17             | 57232194     | 57232195   | 340                      |
| USP1               | ENST00000339950   | chr1              | 62902665     | 62902666   | 341                      |
| CDT1               | ENST00000301019   | chr16             | 88869971     | 88869972   | 352                      |
| KLF11              | ENST00000535335   | chr2              | 10184727     | 10184728   | 357                      |
| CDC27P2            | ENST00000425026   | chrY              | 10029542     | 10029543   | 364                      |
| RNA28S5            | ENST00000419932   | chrX              | 108297425    | 108297426  | 366                      |
| TNFAIP8            | ENST00000388882   | chr5              | 118604818    | 118604819  | 371                      |
| RP11-413E6.7       | ENST00000489078   | chr3              | 75718461     | 75718462   | 381                      |
| IPO5               | ENST00000475420   | chr13             | 98628271     | 98628272   | 388                      |
| YEATS4             | ENST00000552955   | chr12             | 69753985     | 69753986   | 428                      |
| NUP160             | ENST00000530326   | chr11             | 47869431     | 47869432   | 433                      |
| CFDP1              | ENST00000566254   | chr16             | 75466835     | 75466836   | 453                      |
| CHAF1A             | ENST00000585854   | chr19             | 4403173      | 4403174    | 461                      |
| RP11-973N13.4      | ENST00000554918   | chr14             | 65006623     | 65006624   | 462                      |
| DEK                | ENST00000515742   | chr6              | 18263964     | 18263965   | 474                      |
| TTL9               | ENST00000375922   | chr20             | 30468106     | 30468107   | 476                      |
| PARP1              | ENST00000366790   | chr1              | 226595204    | 226595205  | 478                      |
| DDX12P             | ENST00000440299   | chr12             | 9600329      | 9600330    | 479                      |
| NUP153             | ENST00000262077   | chr6              | 17706130     | 17706131   | 487                      |
| KHDC1              | ENST00000484801   | chr6              | 74019370     | 74019371   | 495                      |
| FBXO5              | ENST00000229758   | chr6              | 153303649    | 153303650  | 503                      |
| LINC00273          | ENST00000567668   | chr16             | 33956574     | 33956575   | 540                      |
| VAT1               | ENST00000587173   | chr17             | 41173798     | 41173799   | 574                      |
| PANK2              | ENST00000336066   | chr20             | 3870614      | 3870615    | 580                      |
| MYBL2              | ENST00000217026   | chr20             | 42296391     | 42296392   | 596                      |
| EIF1AX             | ENST00000379593   | chrX              | 20159343     | 20159344   | 600                      |
| MAK                | ENST00000313243   | chr6              | 10838121     | 10838122   | 606                      |
| LUC7L2             | ENST00000456182   | chr7              | 139045301    | 139045302  | 645                      |
| HIST1H2BK          | ENST00000356950   | chr6              | 27113930     | 27113931   | 646                      |
| CDC27              | ENST00000571643   | chr17             | 45213953     | 45213954   | 656                      |
| RP11-715J22.2      | ENST00000563775   | chr16             | 2517516      | 2517517    | 697                      |
| RP1-90J20.7        | ENST00000597787   | chr6              | 2989631      | 2989632    | 700                      |
| DHX15              | ENST00000511553   | chr4              | 24585195     | 24585196   | 709                      |
| PCNA               | ENST00000379143   | chr20             | 5099946      | 5099947    | 725                      |
| MB21D1             | ENST00000370318   | chr6              | 74161255     | 74161256   | 726                      |
| WDR76              | ENST00000452115   | chr15             | 44119929     | 44119930   | 745                      |

**Supplemental Table 1: Genes with significant occupancy of E2F7 at the promoter regions (-5kb to +2kb)**

| <b>Gene Symbol</b> | <b>Ensembl ID</b> | <b>Chromosome</b> | <b>Start</b> | <b>End</b> | <b>distance from TSS</b> |
|--------------------|-------------------|-------------------|--------------|------------|--------------------------|
| E2F1               | ENST00000343380   | chr20             | 32273453     | 32273454   | 756                      |
| SLC20A1            | ENST00000272542   | chr2              | 113404219    | 113404220  | 787                      |
| E2F3               | ENST00000346618   | chr6              | 20403186     | 20403187   | 790                      |
| RNA45S5            | ENST00000445125   | chrY              | 10035894     | 10035895   | 816                      |
| RNU1-5             | ENST00000384010   | chr1              | 149223402    | 149223403  | 818                      |
| KITLG              | ENST00000228280   | chr12             | 88973383     | 88973384   | 854                      |
| PPRC1              | ENST00000413464   | chr10             | 103893698    | 103893699  | 903                      |
| NASP               | ENST00000351223   | chr1              | 46050649     | 46050650   | 914                      |
| GMPS               | ENST00000541628   | chr3              | 155589425    | 155589426  | 927                      |
| E2F2               | ENST00000361729   | chr1              | 23856773     | 23856774   | 938                      |
| ELF2               | ENST00000379549   | chr4              | 140004365    | 140004366  | 978                      |
| AC002558.2         | ENST00000599091   | chr17             | 45213146     | 45213147   | 995                      |
| UCK2               | ENST00000372212   | chr1              | 165798092    | 165798093  | 1035                     |
| MIR3687            | ENST00000577708   | chr21             | 9827244      | 9827245    | 1043                     |
| ZNF367             | ENST00000375256   | chr9              | 99179555     | 99179556   | 1055                     |
| LMNB1              | ENST00000463908   | chr5              | 126114253    | 126114254  | 1184                     |
| ERVH48-1           | ENST00000447535   | chr21             | 44344342     | 44344343   | 1413                     |
| LINC00273          | ENST00000567668   | chr16             | 33955676     | 33955677   | 1438                     |
| KIF25              | ENST00000496008   | chr6              | 168436191    | 168436192  | 1515                     |
| MIR663B            | ENST00000408361   | chr2              | 133012951    | 133012952  | 1701                     |
| FSCN1              | ENST00000405801   | chr7              | 5636079      | 5636080    | 1764                     |
| AC007450.1         | ENST00000408201   | chr12             | 11693079     | 11693080   | 1899                     |
| CDKN1A             | ENST00000462537   | chr6              | 36648477     | 36648478   | 1931                     |
| SEMA6B             | ENST00000586965   | chr19             | 4556534      | 4556535    | 1934                     |

**Supplemental Table 2: Genes with significant occupancy of E2F8 at the promoter regions (-5kb to+2kb)**

| <b>Gene Symbol</b> | <b>Ensembl ID</b> | <b>Chromosome</b> | <b>Start</b> | <b>End</b> | <b>distance from TSS</b> |
|--------------------|-------------------|-------------------|--------------|------------|--------------------------|
| TTC32              | ENST00000333610   | chr2              | 20106670     | 20106671   | -4925                    |
| SERPINE1           | ENST00000223095   | chr7              | 100765490    | 100765491  | -4879                    |
| ERI3               | ENST00000372259   | chr1              | 44793588     | 44793589   | -4875                    |
| CTC-276P9.3        | ENST00000509530   | chr5              | 134471798    | 134471799  | -4861                    |
| KCNH3              | ENST00000257981   | chr12             | 49928083     | 49928084   | -4856                    |
| SBF2-AS1           | ENST00000525636   | chr11             | 9792336      | 9792337    | -4855                    |
| GFI1B              | ENST00000450530   | chr9              | 135849242    | 135849243  | -4855                    |
| PRICKLE3           | ENST00000376317   | chrX              | 49047692     | 49047693   | -4849                    |
| MRPL11             | ENST00000430466   | chr11             | 66211159     | 66211160   | -4842                    |
| MALAT1             | ENST00000534336   | chr11             | 65260392     | 65260393   | -4840                    |
| RP11-626K17.2      | ENST00000569776   | chr16             | 32476506     | 32476507   | -4825                    |
| GABRQ              | ENST00000370306   | chrX              | 151801825    | 151801826  | -4811                    |
| C5orf46            | ENST00000515291   | chr5              | 147290883    | 147290884  | -4784                    |
| WDR25              | ENST00000555865   | chr14             | 100938043    | 100938044  | -4767                    |
| PXN                | ENST00000536957   | chr12             | 120669411    | 120669412  | -4766                    |
| AC131971.3         | ENST00000439505   | chr11             | 2960907      | 2960908    | -4760                    |
| MEF2B              | ENST00000409447   | chr19             | 19285853     | 19285854   | -4757                    |
| NFATC2IP           | ENST00000564978   | chr16             | 28957422     | 28957423   | -4705                    |
| AC004383.3         | ENST00000438135   | chrX              | 133652030    | 133652031  | -4701                    |
| RFX2               | ENST00000592281   | chr19             | 6061989      | 6061990    | -4697                    |
| E2F2               | ENST00000487237   | chr1              | 23850580     | 23850581   | -4694                    |
| FHL2               | ENST00000409177   | chr2              | 106020807    | 106020808  | -4685                    |
| CTD-2277K2.1       | ENST00000554436   | chr14             | 62326947     | 62326948   | -4650                    |
| TNS4               | ENST00000394072   | chr17             | 38641765     | 38641766   | -4640                    |
| NCAN               | ENST00000590187   | chr19             | 19333019     | 19333020   | -4632                    |
| ENPP6              | ENST00000510054   | chr4              | 185043576    | 185043577  | -4604                    |
| SCGB1D2            | ENST00000244926   | chr11             | 62005093     | 62005094   | -4588                    |
| F2RL1              | ENST00000514165   | chr5              | 76110189     | 76110190   | -4568                    |
| U6                 | ENST00000459597   | chr8              | 43153973     | 43153974   | -4545                    |
| RP4-745E8.2        | ENST00000444923   | chr1              | 20654180     | 20654181   | -4502                    |
| LINC00346          | ENST00000538077   | chr13             | 111526641    | 111526642  | -4481                    |
| DNAJC6             | ENST00000498720   | chr1              | 65845307     | 65845308   | -4461                    |
| MARVELD1           | ENST00000451097   | chr10             | 99468478     | 99468479   | -4451                    |
| 7SK                | ENST00000410439   | chr10             | 69913400     | 69913401   | -4435                    |
| CCND1              | ENST00000227507   | chr11             | 69451433     | 69451434   | -4421                    |
| Metazoa_SRP        | ENST00000488637   | chr7              | 72316702     | 72316703   | -4399                    |
| RP11-803B1.3       | ENST00000487255   | chr3              | 75449072     | 75449073   | -4387                    |
| CTD-3138B18.6      | ENST00000595301   | chr19             | 58773625     | 58773626   | -4375                    |
| RP1-308E4.1        | ENST00000438601   | chr1              | 28775678     | 28775679   | -4373                    |
| RP1-310O13.7       | ENST00000449519   | chr20             | 30623742     | 30623743   | -4366                    |



**Supplemental Table 2: Genes with significant occupancy of E2F8 at the promoter regions (-5kb to+2kb)**

| Gene Symbol    | Ensembl ID      | Chromosome | Start     | End       | distance from TSS |
|----------------|-----------------|------------|-----------|-----------|-------------------|
| BTG3           | ENST00000348354 | chr21      | 18989627  | 18989628  | -4364             |
| SYS1           | ENST00000372727 | chr20      | 43986214  | 43986215  | -4362             |
| FTLP12         | ENST00000578296 | chr17      | 16290386  | 16290387  | -4361             |
| DUX4L16        | ENST00000555130 | chrY       | 13458260  | 13458261  | -4333             |
| SNORA40        | ENST00000517238 | chr1       | 150577433 | 150577434 | -4300             |
| RNF213         | ENST00000508628 | chr17      | 78230390  | 78230391  | -4274             |
| ARHGAP23       | ENST00000548333 | chr17      | 36621561  | 36621562  | -4259             |
| RP11-774O3.2   | ENST00000509453 | chr4       | 8317648   | 8317649   | -4254             |
| LEPROTL1       | ENST00000321250 | chr8       | 29948661  | 29948662  | -4252             |
| AL132671.1     | ENST00000408507 | chr6       | 117762306 | 117762307 | -4246             |
| AC009469.1     | ENST00000546295 | chr2       | 218670213 | 218670214 | -4236             |
| U6             | ENST00000384019 | chr18      | 60402792  | 60402793  | -4229             |
| PRR14          | ENST00000563399 | chr16      | 30657812  | 30657813  | -4225             |
| AC079780.3     | ENST00000428259 | chr7       | 23516151  | 23516152  | -4220             |
| BTC            | ENST00000395743 | chr4       | 75724112  | 75724113  | -4218             |
| MAP4           | ENST00000477765 | chr3       | 47903182  | 47903183  | -4216             |
| KCNN4          | ENST00000262888 | chr19      | 44289613  | 44289614  | -4206             |
| AC006967.1     | ENST00000594086 | chr7       | 156898501 | 156898502 | -4172             |
| FAM83A         | ENST00000523819 | chr8       | 124187041 | 124187042 | -4158             |
| KIAA0146       | ENST00000517619 | chr8       | 48635601  | 48635602  | -4156             |
| SLCO4A1        | ENST00000370507 | chr20      | 61283576  | 61283577  | -4134             |
| IGF2BP3        | ENST00000258729 | chr7       | 23514217  | 23514218  | -4133             |
| RP11-4O1.2     | ENST00000563434 | chr9       | 114804123 | 114804124 | -4115             |
| ROCK1P1        | ENST00000576266 | chr18      | 108287    | 108288    | -4079             |
| IGFL1          | ENST00000437936 | chr19      | 46728953  | 46728954  | -4055             |
| Y_RNA          | ENST00000516627 | chr2       | 62957916  | 62957917  | -4043             |
| AC073133.1     | ENST00000436670 | chr7       | 156242314 | 156242315 | -4034             |
| RP11-886I11.4  | ENST00000557448 | chrY       | 13483981  | 13483982  | -4023             |
| AC092687.4     | ENST00000418835 | chr2       | 10983682  | 10983683  | -4020             |
| CD99           | ENST00000482293 | chrX       | 2631406   | 2631407   | -4008             |
| RP11-145A3.4   | ENST00000434499 | chr1       | 225986874 | 225986875 | -3975             |
| RP5-940J5.8    | ENST00000499202 | chr12      | 6648703   | 6648704   | -3966             |
| LINC00489      | ENST00000457816 | chr20      | 36255476  | 36255477  | -3957             |
| FMNL1          | ENST00000585852 | chr17      | 43304097  | 43304098  | -3938             |
| RP11-241F15.3  | ENST00000514077 | chr4       | 49514754  | 49514755  | -3933             |
| MAP3K1         | ENST00000469188 | chr5       | 56177848  | 56177849  | -3931             |
| Y_RNA          | ENST00000363413 | chr2       | 29199313  | 29199314  | -3928             |
| ZNF275         | ENST00000421401 | chrX       | 152595696 | 152595697 | -3916             |
| RTEL1-TNFRSF6B | ENST00000480273 | chr20      | 62313827  | 62313828  | -3896             |
| CTSZ           | ENST00000217131 | chr20      | 57586193  | 57586194  | -3893             |

**Supplemental Table 2: Genes with significant occupancy of E2F8 at the promoter regions (-5kb to+2kb)**

| Gene Symbol   | Ensembl ID      | Chromosome | Start     | End       | distance from TSS |
|---------------|-----------------|------------|-----------|-----------|-------------------|
| PPP6R2        | ENST00000359139 | chr22      | 50777857  | 50777858  | -3875             |
| MAPK10        | ENST00000514856 | chr4       | 87285245  | 87285246  | -3870             |
| IL1R1         | ENST00000409589 | chr2       | 102717170 | 102717171 | -3852             |
| TNS4          | ENST00000394072 | chr17      | 38640966  | 38640967  | -3841             |
| MIR3159       | ENST00000584572 | chr11      | 18405533  | 18405534  | -3800             |
| LIPH          | ENST00000452897 | chr3       | 185255244 | 185255245 | -3798             |
| HRASLS2       | ENST00000255695 | chr11      | 63334619  | 63334620  | -3766             |
| IL12RB1       | ENST00000322153 | chr19      | 18201577  | 18201578  | -3766             |
| ZP3           | ENST00000394857 | chr7       | 76050477  | 76050478  | -3746             |
| SNORA77       | ENST00000408156 | chr1       | 8575710   | 8575711   | -3734             |
| TXNDC9        | ENST00000409705 | chr2       | 99960878  | 99960879  | -3715             |
| AC073133.1    | ENST00000436670 | chr7       | 156241981 | 156241982 | -3701             |
| RP11-960B9.2  | ENST00000573698 | chr17      | 6097555   | 6097556   | -3696             |
| EEF1A1P38     | ENST00000567658 | chr16      | 27150186  | 27150187  | -3688             |
| HOXD13        | ENST00000392539 | chr2       | 176953933 | 176953934 | -3685             |
| snoU13        | ENST00000459157 | chr2       | 178214365 | 178214366 | -3678             |
| MTND2P9       | ENST00000422293 | chr9       | 83184553  | 83184554  | -3678             |
| UPP1          | ENST00000416681 | chr7       | 48124585  | 48124586  | -3639             |
| SLC14A2       | ENST00000586448 | chr18      | 42789336  | 42789337  | -3623             |
| UNC13A        | ENST00000517497 | chr19      | 17733472  | 17733473  | -3623             |
| U4            | ENST00000364351 | chr20      | 34471966  | 34471967  | -3614             |
| PHKA2-AS1     | ENST00000452900 | chrX       | 18904803  | 18904804  | -3610             |
| ARHGAP23      | ENST00000548333 | chr17      | 36622224  | 36622225  | -3596             |
| RP11-234K19.1 | ENST00000513155 | chr4       | 80514126  | 80514127  | -3569             |
| LEPROTL1      | ENST00000321250 | chr8       | 29949356  | 29949357  | -3557             |
| SMS           | ENST00000404933 | chrX       | 21955144  | 21955145  | -3546             |
| MTND5P15      | ENST00000434246 | chr3       | 176732383 | 176732384 | -3530             |
| CXXC11        | ENST00000419912 | chr2       | 242808255 | 242808256 | -3496             |
| FAM204A       | ENST00000487269 | chr10      | 120105331 | 120105332 | -3493             |
| Y_RNA         | ENST00000363435 | chr15      | 40218571  | 40218572  | -3486             |
| 7SK           | ENST00000362813 | chr20      | 36607364  | 36607365  | -3483             |
| DENND1A       | ENST00000373618 | chr9       | 126695901 | 126695902 | -3472             |
| HDGFRP2       | ENST00000587016 | chr19      | 4492868   | 4492869   | -3461             |
| GARNL3        | ENST00000478702 | chr9       | 130004217 | 130004218 | -3398             |
| AL590403.1    | ENST00000408852 | chr6       | 34040368  | 34040369  | -3375             |
| NID2          | ENST00000541773 | chr14      | 52539084  | 52539085  | -3374             |
| RP11-666A8.9  | ENST00000588104 | chr17      | 74562527  | 74562528  | -3346             |
| LINC00266-1   | ENST00000279067 | chr20      | 62918406  | 62918407  | -3331             |
| LINC00501     | ENST00000425388 | chr3       | 177008900 | 177008901 | -3329             |
| NCALD         | ENST00000520690 | chr8       | 102990881 | 102990882 | -3326             |

**Supplemental Table 2: Genes with significant occupancy of E2F8 at the promoter regions (-5kb to+2kb)**

| Gene Symbol   | Ensembl ID      | Chromosome | Start     | End       | distance from TSS |
|---------------|-----------------|------------|-----------|-----------|-------------------|
| CCDC173       | ENST00000419478 | chr2       | 170541152 | 170541153 | -3320             |
| LSM4          | ENST00000597776 | chr19      | 18430382  | 18430383  | -3315             |
| TBL1X         | ENST00000497555 | chrX       | 9604545   | 9604546   | -3314             |
| RP3-391O22.2  | ENST00000404151 | chr6       | 34581010  | 34581011  | -3304             |
| FMNL1         | ENST00000587489 | chr17      | 43315166  | 43315167  | -3275             |
| CAPN2         | ENST00000433674 | chr1       | 223886028 | 223886029 | -3266             |
| CLCA2         | ENST00000498802 | chr1       | 86910565  | 86910566  | -3251             |
| MIR3646       | ENST00000578301 | chr20      | 43033511  | 43033512  | -3248             |
| SMCR7L        | ENST00000464629 | chr22      | 39892196  | 39892197  | -3240             |
| RP11-886111.4 | ENST00000557448 | chrY       | 13484764  | 13484765  | -3240             |
| AC133041.1    | ENST00000408675 | chr3       | 75595712  | 75595713  | -3235             |
| IL17RE        | ENST00000461534 | chr3       | 9941062   | 9941063   | -3233             |
| AC068587.1    | ENST00000459100 | chr8       | 12490387  | 12490388  | -3225             |
| HPCAL1        | ENST00000423674 | chr2       | 10439797  | 10439798  | -3217             |
| RP11-705O24.4 | ENST00000522049 | chr8       | 62826567  | 62826568  | -3208             |
| GYG1P1        | ENST00000460864 | chr8       | 74830387  | 74830388  | -3144             |
| MIR3911       | ENST00000577791 | chr9       | 130456189 | 130456190 | -3117             |
| CHMP7         | ENST00000397677 | chr8       | 23098052  | 23098053  | -3097             |
| GLYCTK        | ENST00000461183 | chr3       | 52318018  | 52318019  | -3086             |
| ST13P3        | ENST00000546640 | chr12      | 106406606 | 106406607 | -3068             |
| HES7          | ENST00000577735 | chr17      | 8030451   | 8030452   | -3043             |
| AL121594.1    | ENST00000578587 | chr14      | 35757701  | 35757702  | -2990             |
| AC091435.1    | ENST00000381778 | chr5       | 38824568  | 38824569  | -2989             |
| RALGDS        | ENST00000372047 | chr9       | 135999543 | 135999544 | -2982             |
| IRF2BP2       | ENST00000366609 | chr1       | 234748231 | 234748232 | -2962             |
| PBX1          | ENST00000558796 | chr1       | 164618173 | 164618174 | -2959             |
| TNFRSF6B      | ENST00000369996 | chr20      | 62325070  | 62325071  | -2950             |
| ADAMTS12      | ENST00000506952 | chr5       | 33627404  | 33627405  | -2950             |
| WAS           | ENST00000376701 | chrX       | 48539221  | 48539222  | -2946             |
| RP11-388E23.3 | ENST00000556165 | chr14      | 24299548  | 24299549  | -2945             |
| ABR           | ENST00000575770 | chr17      | 964219    | 964220    | -2934             |
| UTP6          | ENST00000261708 | chr17      | 30231702  | 30231703  | -2920             |
| DUX4L16       | ENST00000555130 | chrY       | 13459677  | 13459678  | -2916             |
| RXRA          | ENST00000356384 | chr9       | 137260901 | 137260902 | -2915             |
| LRRK2         | ENST00000416796 | chr12      | 40587649  | 40587650  | -2896             |
| FAM3D         | ENST00000358781 | chr3       | 58655465  | 58655466  | -2892             |
| KLHL15        | ENST00000328046 | chrX       | 24048191  | 24048192  | -2890             |
| RP11-812D23.1 | ENST00000548429 | chr12      | 86406596  | 86406597  | -2878             |
| TRABD2A       | ENST00000474298 | chr2       | 85136997  | 85136998  | -2867             |
| AC097495.2    | ENST00000415138 | chr2       | 69056312  | 69056313  | -2863             |

**Supplemental Table 2: Genes with significant occupancy of E2F8 at the promoter regions (-5kb to+2kb)**

| Gene Symbol   | Ensembl ID      | Chromosome | Start     | End       | distance from TSS |
|---------------|-----------------|------------|-----------|-----------|-------------------|
| U6            | ENST00000363650 | chr4       | 140236683 | 140236684 | -2848             |
| ZNF592        | ENST00000559607 | chr15      | 85318647  | 85318648  | -2843             |
| SMOX          | ENST00000305958 | chr20      | 4126598   | 4126599   | -2827             |
| NFE2L2        | ENST00000458603 | chr2       | 178100022 | 178100023 | -2809             |
| CTD-2008L17.2 | ENST00000382897 | chr18      | 53861297  | 53861298  | -2806             |
| CEACAM3       | ENST00000599662 | chr19      | 42310050  | 42310051  | -2800             |
| RP1-24O22.3   | ENST00000406017 | chr6       | 147879    | 147880    | -2798             |
| PTPRE         | ENST00000492479 | chr10      | 129858394 | 129858395 | -2788             |
| CTB-133G6.1   | ENST00000576789 | chr19      | 7411066   | 7411067   | -2781             |
| ZFH4          | ENST00000521891 | chr8       | 77590675  | 77590676  | -2778             |
| MYOZ3         | ENST00000517768 | chr5       | 150037663 | 150037664 | -2772             |
| DPEP1         | ENST00000564645 | chr16      | 89701215  | 89701216  | -2768             |
| SMAP2         | ENST00000435168 | chr1       | 40807759  | 40807760  | -2762             |
| TFEC          | ENST00000320239 | chr7       | 115673608 | 115673609 | -2743             |
| RP11-3M1.1    | ENST00000563906 | chr16      | 48203884  | 48203885  | -2737             |
| LYST          | ENST00000462376 | chr1       | 235878434 | 235878435 | -2736             |
| CENPM         | ENST00000472374 | chr22      | 42338953  | 42338954  | -2732             |
| RP11-141M1.3  | ENST00000454681 | chr13      | 34253612  | 34253613  | -2709             |
| MEF2D         | ENST00000348159 | chr1       | 156473324 | 156473325 | -2706             |
| ARF4P2        | ENST00000430209 | chr20      | 61507098  | 61507099  | -2672             |
| JPH2          | ENST00000372980 | chr20      | 42818879  | 42818880  | -2663             |
| IGLV3-30      | ENST00000524362 | chr22      | 22958380  | 22958381  | -2661             |
| WNT7B         | ENST00000339464 | chr22      | 46375641  | 46375642  | -2634             |
| DDX3X         | ENST00000478993 | chrX       | 41190022  | 41190023  | -2628             |
| CALCR         | ENST00000394441 | chr7       | 93191746  | 93191747  | -2626             |
| SSPO          | ENST00000484709 | chr7       | 149496287 | 149496288 | -2595             |
| FRAT1         | ENST00000371021 | chr10      | 99076446  | 99076447  | -2575             |
| RP11-779O18.2 | ENST00000521069 | chr5       | 172192828 | 172192829 | -2569             |
| RP11-886I11.4 | ENST00000557448 | chrY       | 13485435  | 13485436  | -2569             |
| XRCC1         | ENST00000597811 | chr19      | 44067651  | 44067652  | -2552             |
| ATP1A2        | ENST00000463989 | chr1       | 160103925 | 160103926 | -2535             |
| RALGDS        | ENST00000372047 | chr9       | 135999096 | 135999097 | -2535             |
| ZNF461        | ENST00000540605 | chr19      | 37137014  | 37137015  | -2507             |
| RXRA          | ENST00000356384 | chr9       | 137261317 | 137261318 | -2499             |
| RP11-886I11.2 | ENST00000557360 | chrY       | 13468100  | 13468101  | -2496             |
| RFX2          | ENST00000592281 | chr19      | 6059761   | 6059762   | -2469             |
| RP11-54O15.3  | ENST00000439872 | chr9       | 97699690  | 97699691  | -2464             |
| NAA60         | ENST00000572584 | chr16      | 3523718   | 3523719   | -2457             |
| RP11-290F20.1 | ENST00000457853 | chr20      | 48925060  | 48925061  | -2450             |
| SHANK2        | ENST00000425049 | chr11      | 70721652  | 70721653  | -2427             |

**Supplemental Table 2: Genes with significant occupancy of E2F8 at the promoter regions (-5kb to+2kb)**

| <b>Gene Symbol</b> | <b>Ensembl ID</b> | <b>Chromosome</b> | <b>Start</b> | <b>End</b> | <b>distance from TSS</b> |
|--------------------|-------------------|-------------------|--------------|------------|--------------------------|
| DDX11L16           | ENST00000445777   | chrX              | 155260268    | 155260269  | -2422                    |
| CDT1               | ENST00000301019   | chr16             | 88867221     | 88867222   | -2399                    |
| RPL31P59           | ENST00000486139   | chr18             | 3380634      | 3380635    | -2391                    |
| C14orf164          | ENST00000430154   | chr14             | 23707176     | 23707177   | -2378                    |
| RBKS               | ENST00000458185   | chr2              | 28068396     | 28068397   | -2370                    |
| CTD-2319I12.5      | ENST00000592317   | chr17             | 58219798     | 58219799   | -2358                    |
| TNFRSF1A           | ENST00000437813   | chr12             | 6445762      | 6445763    | -2354                    |
| TOP3B              | ENST00000442653   | chr22             | 22332693     | 22332694   | -2354                    |
| ZNF385D            | ENST00000281523   | chr3              | 21795268     | 21795269   | -2343                    |
| AL022315.1         | ENST00000598460   | chr22             | 37965866     | 37965867   | -2339                    |
| GNAT1              | ENST00000232461   | chr3              | 50226710     | 50226711   | -2334                    |
| HES1               | ENST00000232424   | chr3              | 193851599    | 193851600  | -2334                    |
| SH2D3C             | ENST00000429553   | chr9              | 130527011    | 130527012  | -2316                    |
| SLC27A3            | ENST00000271857   | chr1              | 153744514    | 153744515  | -2315                    |
| FBXO46             | ENST00000591686   | chr19             | 46220844     | 46220845   | -2310                    |
| LITAF              | ENST00000576036   | chr16             | 11725368     | 11725369   | -2304                    |
| KRT42P             | ENST00000458343   | chr17             | 39789139     | 39789140   | -2297                    |
| RP5-1087E8.2       | ENST00000438895   | chr1              | 227148246    | 227148247  | -2280                    |
| TRIP13             | ENST00000510412   | chr5              | 912394       | 912395     | -2279                    |
| CTD-2568A17.8      | ENST00000594114   | chr19             | 51299104     | 51299105   | -2265                    |
| SERPINA12          | ENST00000341228   | chr14             | 94986433     | 94986434   | -2254                    |
| APC2               | ENST00000587869   | chr19             | 1444069      | 1444070    | -2230                    |
| RP11-886I11.3      | ENST00000553347   | chrY              | 13475011     | 13475012   | -2221                    |
| RP11-438C19.1      | ENST00000515822   | chr5              | 114426384    | 114426385  | -2214                    |
| FBXL20             | ENST00000577399   | chr17             | 37560984     | 37560985   | -2210                    |
| CLPTM1L            | ENST00000507195   | chr5              | 1328758      | 1328759    | -2209                    |
| RP11-301M17.1      | ENST00000415381   | chr1              | 147716245    | 147716246  | -2194                    |
| RPL31P50           | ENST00000471002   | chr12             | 31752522     | 31752523   | -2181                    |
| HM13-IT1           | ENST00000421894   | chr20             | 30148791     | 30148792   | -2177                    |
| TRAPPC3            | ENST00000373162   | chr1              | 36617271     | 36617272   | -2175                    |
| UCKL1              | ENST00000492660   | chr20             | 62580031     | 62580032   | -2172                    |
| C19orf59           | ENST00000333598   | chr19             | 7739364      | 7739365    | -2149                    |
| LRTOMT             | ENST00000440313   | chr11             | 71803896     | 71803897   | -2139                    |
| RP11-255B23.4      | ENST00000521815   | chr8              | 128217594    | 128217595  | -2129                    |
| BHLHE40            | ENST00000256495   | chr3              | 5018675      | 5018676    | -2125                    |
| LTBP4              | ENST00000595529   | chr19             | 41110252     | 41110253   | -2119                    |
| LIN28A             | ENST00000326279   | chr1              | 26735167     | 26735168   | -2101                    |
| CTC-448F2.3        | ENST00000585753   | chr19             | 30409990     | 30409991   | -2098                    |
| SREBF1             | ENST00000338854   | chr17             | 17742410     | 17742411   | -2087                    |
| ARNTL2             | ENST00000544915   | chr12             | 27483707     | 27483708   | -2079                    |

**Supplemental Table 2: Genes with significant occupancy of E2F8 at the promoter regions (-5kb to+2kb)**

| Gene Symbol   | Ensembl ID      | Chromosome | Start     | End       | distance from TSS |
|---------------|-----------------|------------|-----------|-----------|-------------------|
| AC099544.2    | ENST00000399435 | chr3       | 23173824  | 23173825  | -2038             |
| DDX11L8       | ENST00000535849 | chr12      | 95458     | 95459     | -2030             |
| SYS1          | ENST00000372727 | chr20      | 43988549  | 43988550  | -2027             |
| CTD-207306.1  | ENST00000519121 | chr5       | 78013927  | 78013928  | -2024             |
| DDX11L16      | ENST00000445777 | chrX       | 155259870 | 155259871 | -2024             |
| SPI1          | ENST00000378538 | chr11      | 47402127  | 47402128  | -2002             |
| ORAI2         | ENST00000482237 | chr7       | 102071560 | 102071561 | -1992             |
| SLC25A17      | ENST00000478550 | chr22      | 41178248  | 41178249  | -1991             |
| CDC27P2       | ENST00000425026 | chrY       | 10031888  | 10031889  | -1983             |
| RP5-1087E8.2  | ENST00000438895 | chr1       | 227147947 | 227147948 | -1981             |
| DHRS4-AS1     | ENST00000354854 | chr14      | 24405961  | 24405962  | -1978             |
| HMGCS1        | ENST00000433297 | chr5       | 43315582  | 43315583  | -1970             |
| KCTD10        | ENST00000542954 | chr12      | 109900167 | 109900168 | -1969             |
| TRIM25        | ENST00000316881 | chr17      | 54993364  | 54993365  | -1967             |
| IFI16         | ENST00000448393 | chr1       | 158982515 | 158982516 | -1955             |
| RP11-886I11.4 | ENST00000557448 | chrY       | 13486070  | 13486071  | -1934             |
| AE000662.93   | ENST00000557232 | chr14      | 23027887  | 23027888  | -1933             |
| RRM2          | ENST00000360566 | chr2       | 10260526  | 10260527  | -1928             |
| SOS1          | ENST00000428721 | chr2       | 39353406  | 39353407  | -1922             |
| RP11-909N17.2 | ENST00000523002 | chr8       | 144493000 | 144493001 | -1918             |
| FAM102A       | ENST00000479828 | chr9       | 130727934 | 130727935 | -1912             |
| PGAM1P2       | ENST00000436071 | chr9       | 35945840  | 35945841  | -1911             |
| AC091133.1    | ENST00000435491 | chr17      | 47007258  | 47007259  | -1894             |
| DDX11L2       | ENST00000535848 | chr2       | 114361008 | 114361009 | -1866             |
| MT2A          | ENST00000245185 | chr16      | 56640247  | 56640248  | -1863             |
| FBXO46        | ENST00000591686 | chr19      | 46220387  | 46220388  | -1853             |
| KRT36         | ENST00000393986 | chr17      | 39650648  | 39650649  | -1852             |
| MYO1F         | ENST00000598005 | chr19      | 8608687   | 8608688   | -1849             |
| IGFL1P1       | ENST00000599950 | chr19      | 46697654  | 46697655  | -1840             |
| CTB-43E15.4   | ENST00000518675 | chr5       | 173237876 | 173237877 | -1836             |
| CAMTA1        | ENST00000467267 | chr1       | 6932287   | 6932288   | -1828             |
| RP11-709A23.2 | ENST00000538759 | chr12      | 27748790  | 27748791  | -1820             |
| POLA2         | ENST00000534785 | chr11      | 65059832  | 65059833  | -1816             |
| BHLHE40       | ENST00000256495 | chr3       | 5018992   | 5018993   | -1808             |
| AC079325.6    | ENST00000425002 | chr17      | 72565285  | 72565286  | -1805             |
| CABLES2       | ENST00000453274 | chr20      | 60973158  | 60973159  | -1773             |
| LGMN          | ENST00000555169 | chr14      | 93185572  | 93185573  | -1770             |
| ASRGL1        | ENST00000415229 | chr11      | 62103150  | 62103151  | -1769             |
| CNOT3         | ENST00000221232 | chr19      | 54639677  | 54639678  | -1766             |
| PPP1R1C       | ENST00000461410 | chr2       | 182924439 | 182924440 | -1750             |

**Supplemental Table 2: Genes with significant occupancy of E2F8 at the promoter regions (-5kb to+2kb)**

| Gene Symbol   | Ensembl ID      | Chromosome | Start     | End       | distance from TSS |
|---------------|-----------------|------------|-----------|-----------|-------------------|
| LINC00659     | ENST00000412500 | chr20      | 61408508  | 61408509  | -1746             |
| RP3-522P13.1  | ENST00000493462 | chr6       | 25259724  | 25259725  | -1742             |
| RP11-535A19.2 | ENST00000529719 | chr11      | 75528184  | 75528185  | -1735             |
| AK2           | ENST00000466029 | chr1       | 33489015  | 33489016  | -1713             |
| DDX11L1       | ENST00000456328 | chr1       | 10161     | 10162     | -1707             |
| PRKCH         | ENST00000555185 | chr14      | 61652579  | 61652580  | -1697             |
| CD97          | ENST00000591565 | chr19      | 14513484  | 14513485  | -1697             |
| AFAP1         | ENST00000513856 | chr4       | 7865718   | 7865719   | -1682             |
| FBXL20        | ENST00000577399 | chr17      | 37560449  | 37560450  | -1675             |
| RP11-13L2.1   | ENST00000510247 | chr3       | 140340351 | 140340352 | -1674             |
| RP4-701O16.5  | ENST00000520729 | chr7       | 139185548 | 139185549 | -1650             |
| PCNXL2        | ENST00000496510 | chr1       | 233318493 | 233318494 | -1647             |
| CTTNBP2NL     | ENST00000271277 | chr1       | 112937157 | 112937158 | -1645             |
| CTD-2201E18.3 | ENST00000499871 | chr5       | 43020556  | 43020557  | -1645             |
| AC016831.6    | ENST00000446451 | chr7       | 130530122 | 130530123 | -1640             |
| ZNF219        | ENST00000451119 | chr14      | 21574507  | 21574508  | -1628             |
| DGKZ          | ENST00000525242 | chr11      | 46358520  | 46358521  | -1627             |
| Metazoa_SRP   | ENST00000481521 | chr1       | 19749252  | 19749253  | -1625             |
| CDK8          | ENST00000477290 | chr13      | 26910079  | 26910080  | -1624             |
| KDM4B         | ENST00000592175 | chr19      | 5045388   | 5045389   | -1620             |
| HCN3          | ENST00000368358 | chr1       | 155245778 | 155245779 | -1595             |
| U47924.27     | ENST00000537269 | chr12      | 7070833   | 7070834   | -1575             |
| SLC2A13       | ENST00000380858 | chr12      | 40501457  | 40501458  | -1568             |
| RP1-178F15.3  | ENST00000446229 | chr1       | 153619866 | 153619867 | -1563             |
| U6            | ENST00000517223 | chr5       | 55419937  | 55419938  | -1560             |
| DND1P1        | ENST00000580842 | chr17      | 43661682  | 43661683  | -1554             |
| NFIA          | ENST00000479364 | chr1       | 61545890  | 61545891  | -1548             |
| EBI3          | ENST00000221847 | chr19      | 4227947   | 4227948   | -1547             |
| RRM2          | ENST00000360566 | chr2       | 10260913  | 10260914  | -1541             |
| B3GNT5        | ENST00000462559 | chr3       | 183003726 | 183003727 | -1541             |
| DDX11L10      | ENST00000545636 | chr16      | 60015     | 60016     | -1537             |
| PPP1R12B      | ENST00000464965 | chr1       | 202405412 | 202405413 | -1535             |
| MIR4663       | ENST00000582039 | chr8       | 124229634 | 124229635 | -1533             |
| LINC00273     | ENST00000567668 | chr16      | 33958643  | 33958644  | -1530             |
| PAM           | ENST00000510006 | chr5       | 102341627 | 102341628 | -1529             |
| KB-173C10.2   | ENST00000519844 | chr8       | 101428194 | 101428195 | -1509             |
| RP4-604G5.1   | ENST00000456499 | chr7       | 99525509  | 99525510  | -1505             |
| ISY1          | ENST00000393295 | chr3       | 128881634 | 128881635 | -1500             |
| PRKCE         | ENST00000421201 | chr2       | 45876984  | 45876985  | -1499             |
| GAPDHP71      | ENST00000511530 | chr5       | 173938809 | 173938810 | -1498             |

**Supplemental Table 2: Genes with significant occupancy of E2F8 at the promoter regions (-5kb to+2kb)**

| <b>Gene Symbol</b> | <b>Ensembl ID</b> | <b>Chromosome</b> | <b>Start</b> | <b>End</b> | <b>distance from TSS</b> |
|--------------------|-------------------|-------------------|--------------|------------|--------------------------|
| TACC1              | ENST00000521642   | chr8              | 38613263     | 38613264   | -1493                    |
| U6                 | ENST00000384663   | chr2              | 219455517    | 219455518  | -1476                    |
| PLB1               | ENST00000481449   | chr2              | 28806972     | 28806973   | -1474                    |
| AL603766.1         | ENST00000584589   | chr6              | 149499398    | 149499399  | -1470                    |
| BTN2A1             | ENST00000480218   | chr6              | 26463990     | 26463991   | -1464                    |
| GPRIN1             | ENST00000303991   | chr5              | 176038590    | 176038591  | -1458                    |
| ARFGEF2            | ENST00000371917   | chr20             | 47536969     | 47536970   | -1457                    |
| ARL5C              | ENST00000578912   | chr17             | 37320431     | 37320432   | -1446                    |
| PTPN2              | ENST00000587703   | chr18             | 12838261     | 12838262   | -1440                    |
| ITGA5              | ENST00000547744   | chr12             | 54808637     | 54808638   | -1427                    |
| HMGCS1             | ENST00000433297   | chr5              | 43315001     | 43315002   | -1389                    |
| RNA5-8SP2          | ENST00000363564   | chr16             | 33964040     | 33964041   | -1385                    |
| MT2A               | ENST00000245185   | chr16             | 56640746     | 56640747   | -1364                    |
| PDE7A              | ENST00000518667   | chr8              | 66679265     | 66679266   | -1360                    |
| C17orf74           | ENST00000333870   | chr17             | 7327576      | 7327577    | -1357                    |
| KIAA0240           | ENST00000314073   | chr6              | 42748456     | 42748457   | -1356                    |
| DUX4L16            | ENST00000555130   | chrY              | 13461240     | 13461241   | -1353                    |
| LFNG               | ENST00000493850   | chr7              | 2561874      | 2561875    | -1352                    |
| ABCA4              | ENST00000460514   | chr1              | 94492494     | 94492495   | -1345                    |
| ACSL1              | ENST00000515030   | chr4              | 185749306    | 185749307  | -1336                    |
| LINC00442          | ENST00000456737   | chr13             | 19581074     | 19581075   | -1324                    |
| RP11-1055B8.6      | ENST00000574717   | chr17             | 79367954     | 79367955   | -1320                    |
| KAZALD1            | ENST00000370200   | chr10             | 102820281    | 102820282  | -1316                    |
| C16orf91           | ENST00000442039   | chr16             | 1472105      | 1472106    | -1306                    |
| RP11-716H6.1       | ENST00000527100   | chr11             | 122173771    | 122173772  | -1302                    |
| MARK3              | ENST00000440884   | chr14             | 103850444    | 103850445  | -1284                    |
| CCR2               | ENST00000445132   | chr3              | 46393940     | 46393941   | -1284                    |
| ANTXRL             | ENST00000434908   | chr10             | 47667364     | 47667365   | -1277                    |
| N4BP2              | ENST00000261435   | chr4              | 40057169     | 40057170   | -1276                    |
| RP11-886I11.2      | ENST00000557360   | chrY              | 13469327     | 13469328   | -1269                    |
| FAM129B            | ENST00000373312   | chr9              | 130332630    | 130332631  | -1265                    |
| POLG2              | ENST00000539111   | chr17             | 62494412     | 62494413   | -1260                    |
| RP11-6N17.6        | ENST00000582142   | chr17             | 46026892     | 46026893   | -1253                    |
| FOXP1              | ENST00000318789   | chr3              | 71634382     | 71634383   | -1244                    |
| SENP5              | ENST00000489744   | chr3              | 196625666    | 196625667  | -1243                    |
| GLB1L3             | ENST00000467068   | chr11             | 134178355    | 134178356  | -1242                    |
| AC008265.2         | ENST00000399037   | chr7              | 138124192    | 138124193  | -1242                    |
| U47924.27          | ENST00000537269   | chr12             | 7071172      | 7071173    | -1236                    |
| PEG10              | ENST00000465184   | chr7              | 94292820     | 94292821   | -1226                    |
| PCGF2              | ENST00000580830   | chr17             | 36907291     | 36907292   | -1223                    |



**Supplemental Table 2: Genes with significant occupancy of E2F8 at the promoter regions (-5kb to+2kb)**

| Gene Symbol   | Ensembl ID      | Chromosome | Start     | End       | distance from TSS |
|---------------|-----------------|------------|-----------|-----------|-------------------|
| CDCA7         | ENST00000347703 | chr2       | 174218333 | 174218334 | -1214             |
| NEAT1         | ENST00000499732 | chr11      | 65189031  | 65189032  | -1213             |
| KIAA1755      | ENST00000435901 | chr20      | 36856824  | 36856825  | -1205             |
| TMEM194A      | ENST00000300128 | chr12      | 57473734  | 57473735  | -1184             |
| snoU13        | ENST00000516578 | chr5       | 170709478 | 170709479 | -1184             |
| OSBPL5        | ENST00000478260 | chr11      | 3117287   | 3117288   | -1180             |
| PTK2          | ENST00000430260 | chr8       | 141730006 | 141730007 | -1175             |
| PFKFB4        | ENST00000412035 | chr3       | 48595622  | 48595623  | -1174             |
| AC087491.2    | ENST00000398554 | chr17      | 37774693  | 37774694  | -1172             |
| CCDC43        | ENST00000457422 | chr17      | 42768310  | 42768311  | -1165             |
| INADL         | ENST00000371158 | chr1       | 62206989  | 62206990  | -1159             |
| SCUBE2        | ENST00000534295 | chr11      | 9160815   | 9160816   | -1156             |
| RP11-1O10.1   | ENST00000565136 | chr15      | 62525246  | 62525247  | -1154             |
| RP11-104N10.1 | ENST00000565623 | chr16      | 89572020  | 89572021  | -1154             |
| TSC22D1       | ENST00000486464 | chr13      | 45148809  | 45148810  | -1153             |
| RP11-173M1.5  | ENST00000582878 | chr17      | 25680758  | 25680759  | -1150             |
| ZBTB20        | ENST00000357258 | chr3       | 114867264 | 114867265 | -1148             |
| RP4-781K5.8   | ENST00000437601 | chr1       | 234860000 | 234860001 | -1147             |
| CFLAR         | ENST00000425030 | chr2       | 201986056 | 201986057 | -1143             |
| TPM4          | ENST00000590180 | chr19      | 16189729  | 16189730  | -1136             |
| LINC00229     | ENST00000443783 | chr22      | 45022429  | 45022430  | -1132             |
| RP11-51O6.1   | ENST00000591758 | chr16      | 61090996  | 61090997  | -1130             |
| FKBP1A        | ENST00000400137 | chr20      | 1374934   | 1374935   | -1130             |
| LTBP4         | ENST00000595529 | chr19      | 41111246  | 41111247  | -1125             |
| CIZ1          | ENST00000538431 | chr9       | 130955496 | 130955497 | -1122             |
| RP11-109D24.1 | ENST00000562568 | chr16      | 61728762  | 61728763  | -1110             |
| PLAC8         | ENST00000411416 | chr4       | 84032104  | 84032105  | -1110             |
| PPIH          | ENST00000304979 | chr1       | 43122986  | 43122987  | -1109             |
| RP11-72K17.2  | ENST00000509390 | chr5       | 97015489  | 97015490  | -1106             |
| CASP8         | ENST00000392266 | chr2       | 202097066 | 202097067 | -1099             |
| COL8A1        | ENST00000261037 | chr3       | 99356219  | 99356220  | -1099             |
| KIAA0146      | ENST00000517693 | chr8       | 48571133  | 48571134  | -1092             |
| CAPS          | ENST00000588776 | chr19      | 5910630   | 5910631   | -1087             |
| HMG2          | ENST00000468388 | chr1       | 26797856  | 26797857  | -1084             |
| RASSF4        | ENST00000483709 | chr10      | 45464528  | 45464529  | -1084             |
| CTD-2589M5.5  | ENST00000530049 | chr11      | 46258849  | 46258850  | -1083             |
| H3F3AP1       | ENST00000404612 | chr6       | 26323599  | 26323600  | -1081             |
| STT3B         | ENST00000453168 | chr3       | 31573050  | 31573051  | -1079             |
| AP005530.1    | ENST00000575820 | chr18      | 10024     | 10025     | -1078             |
| RP11-544I20.2 | ENST00000359491 | chr14      | 64806381  | 64806382  | -1066             |

**Supplemental Table 2: Genes with significant occupancy of E2F8 at the promoter regions (-5kb to+2kb)**

| <b>Gene Symbol</b> | <b>Ensembl ID</b> | <b>Chromosome</b> | <b>Start</b> | <b>End</b> | <b>distance from TSS</b> |
|--------------------|-------------------|-------------------|--------------|------------|--------------------------|
| ROBO2              | ENST00000469233   | chr3              | 77651828     | 77651829   | -1066                    |
| AC025171.1         | ENST00000451894   | chr5              | 43040611     | 43040612   | -1065                    |
| LINC00273          | ENST00000539813   | chr16             | 33963561     | 33963562   | -1060                    |
| CHST12             | ENST00000258711   | chr7              | 2442163      | 2442164    | -1059                    |
| C22orf39           | ENST00000542103   | chr22             | 19436809     | 19436810   | -1056                    |
| RP1-152L7.5        | ENST00000406724   | chr6              | 52529016     | 52529017   | -1055                    |
| RPL27A             | ENST00000531102   | chr11             | 8709624      | 8709625    | -1052                    |
| AC093627.11        | ENST00000497017   | chr7              | 173868       | 173869     | -1051                    |
| SMIM2-AS1          | ENST00000444663   | chr13             | 44715632     | 44715633   | -1049                    |
| C16orf62           | ENST00000566850   | chr16             | 19709655     | 19709656   | -1042                    |
| ICAM2              | ENST00000418105   | chr17             | 62099026     | 62099027   | -1034                    |
| PRR24              | ENST00000552360   | chr19             | 47777108     | 47777109   | -1033                    |
| FAIM3              | ENST00000529560   | chr1              | 207097622    | 207097623  | -1032                    |
| ENOSF1             | ENST00000583973   | chr18             | 689039       | 689040     | -1031                    |
| SSBP3              | ENST00000371320   | chr1              | 54873119     | 54873120   | -1029                    |
| TMEM38B            | ENST00000374692   | chr9              | 108455797    | 108455798  | -1027                    |
| GPR77              | ENST00000600626   | chr19             | 47839345     | 47839346   | -1025                    |
| DTYMK              | ENST00000305784   | chr2              | 242627429    | 242627430  | -1025                    |
| RP11-420G6.4       | ENST00000420981   | chr6              | 2877763      | 2877764    | -1021                    |
| KCMF1              | ENST00000409785   | chr2              | 85197196     | 85197197   | -1019                    |
| AC093620.5         | ENST00000342963   | chr7              | 5458441      | 5458442    | -1016                    |
| ZMYND19            | ENST00000298585   | chr9              | 140485953    | 140485954  | -1013                    |
| IGF2BP1            | ENST00000290341   | chr17             | 47073764     | 47073765   | -1009                    |
| PLEKHH3            | ENST00000412503   | chr17             | 40830051     | 40830052   | -1005                    |
| ATAD3A             | ENST00000378756   | chr1              | 1446535      | 1446536    | -995                     |
| FBXL20             | ENST00000577399   | chr17             | 37559768     | 37559769   | -994                     |
| RSPH10B2           | ENST00000485920   | chr7              | 6804350      | 6804351    | -986                     |
| TPRA1              | ENST00000490290   | chr3              | 127310921    | 127310922  | -985                     |
| PIM1               | ENST00000373509   | chr6              | 37136996     | 37136997   | -982                     |
| NDE1               | ENST00000574163   | chr16             | 15765555     | 15765556   | -964                     |
| ROCK1P1            | ENST00000576266   | chr18             | 111402       | 111403     | -964                     |
| LRRC8A             | ENST00000492784   | chr9              | 131674064    | 131674065  | -958                     |
| FOSL2              | ENST00000460736   | chr2              | 28614357     | 28614358   | -957                     |
| AQP11              | ENST00000528638   | chr11             | 77299490     | 77299491   | -945                     |
| SLC1A5             | ENST00000542575   | chr19             | 47292793     | 47292794   | -944                     |
| XXbac-BPG308K3.6   | ENST00000440244   | chr6              | 28832063     | 28832064   | -938                     |
| RP11-325P15.2      | ENST00000438469   | chr1              | 146556059    | 146556060  | -934                     |
| RNA5SP60           | ENST00000410620   | chr1              | 159147330    | 159147331  | -932                     |
| C18orf21           | ENST00000592875   | chr18             | 33551113     | 33551114   | -932                     |
| TMPRSS5            | ENST00000299882   | chr11             | 113578020    | 113578021  | -927                     |

**Supplemental Table 2: Genes with significant occupancy of E2F8 at the promoter regions (-5kb to+2kb)**

| Gene Symbol    | Ensembl ID      | Chromosome | Start     | End       | distance from TSS |
|----------------|-----------------|------------|-----------|-----------|-------------------|
| ZC3H7A         | ENST00000355758 | chr16      | 11892045  | 11892046  | -924              |
| TMEM167B       | ENST00000338272 | chr1       | 109632436 | 109632437 | -920              |
| POU2F1         | ENST00000367866 | chr1       | 167189156 | 167189157 | -909              |
| CYP46A1        | ENST00000554611 | chr14      | 100149740 | 100149741 | -900              |
| LAMC1          | ENST00000258341 | chr1       | 182991700 | 182991701 | -896              |
| MAP3K12        | ENST00000551511 | chr12      | 53877264  | 53877265  | -895              |
| CTDSP2         | ENST00000550144 | chr12      | 58224221  | 58224222  | -890              |
| DLG4           | ENST00000451807 | chr17      | 7118111   | 7118112   | -882              |
| EHBP1L1        | ENST00000309295 | chr11      | 65342629  | 65342630  | -879              |
| CR848007.2     | ENST00000442354 | chr9       | 44070756  | 44070757  | -877              |
| U6             | ENST00000516104 | chr22      | 42966124  | 42966125  | -870              |
| FST            | ENST00000256759 | chr5       | 52775368  | 52775369  | -870              |
| RP11-313F23.4  | ENST00000545923 | chr12      | 34372654  | 34372655  | -868              |
| IL15RA         | ENST00000532039 | chr10      | 6009163   | 6009164   | -863              |
| RP11-536D16.2  | ENST00000443838 | chr9       | 16120281  | 16120282  | -849              |
| LSM14B         | ENST00000253001 | chr20      | 60696672  | 60696673  | -844              |
| CDC27P1        | ENST00000445384 | chr2       | 133019058 | 133019059 | -842              |
| KRI1           | ENST00000312962 | chr19      | 10677540  | 10677541  | -829              |
| RUSC2          | ENST00000361226 | chr9       | 35489299  | 35489300  | -824              |
| TNXB           | ENST00000375244 | chr6       | 32077969  | 32077970  | -820              |
| SHC1           | ENST00000448116 | chr1       | 154944040 | 154944041 | -819              |
| RP11-301M17.1  | ENST00000415381 | chr1       | 147717626 | 147717627 | -813              |
| EFNA1          | ENST00000474413 | chr1       | 155101228 | 155101229 | -809              |
| CCBL1          | ENST00000416084 | chr9       | 131609943 | 131609944 | -809              |
| RP11-386G11.10 | ENST00000548149 | chr12      | 49520762  | 49520763  | -802              |
| DLX4           | ENST00000503410 | chr17      | 48045534  | 48045535  | -799              |
| C18orf56       | ENST00000323813 | chr18      | 659133    | 659134    | -795              |
| HK2            | ENST00000472302 | chr2       | 75080667  | 75080668  | -792              |
| CDC42          | ENST00000400259 | chr1       | 22378330  | 22378331  | -789              |
| BANP           | ENST00000393207 | chr16      | 88002841  | 88002842  | -782              |
| RAP1B          | ENST00000250559 | chr12      | 69003837  | 69003838  | -781              |
| C15orf39       | ENST00000562637 | chr15      | 75490427  | 75490428  | -779              |
| AC006372.1     | ENST00000444154 | chr7       | 157317697 | 157317698 | -779              |
| RP11-981G7.2   | ENST00000524047 | chr8       | 10331299  | 10331300  | -775              |
| LMNA           | ENST00000448611 | chr1       | 156095178 | 156095179 | -772              |
| PARD6B         | ENST00000371610 | chr20      | 49347309  | 49347310  | -771              |
| AL132709.2     | ENST00000579587 | chr14      | 101504909 | 101504910 | -770              |
| FAM222A        | ENST00000538780 | chr12      | 110151269 | 110151270 | -763              |
| MIR4802        | ENST00000581881 | chr4       | 40504889  | 40504890  | -755              |
| SLBP           | ENST00000489418 | chr4       | 1715032   | 1715033   | -752              |

**Supplemental Table 2: Genes with significant occupancy of E2F8 at the promoter regions (-5kb to+2kb)**

| Gene Symbol   | Ensembl ID      | Chromosome | Start     | End       | distance from TSS |
|---------------|-----------------|------------|-----------|-----------|-------------------|
| RP11-368P15.1 | ENST00000554238 | chr14      | 53477937  | 53477938  | -751              |
| CD300A        | ENST00000360141 | chr17      | 72461804  | 72461805  | -750              |
| CDKN1B        | ENST00000228872 | chr12      | 12869319  | 12869320  | -738              |
| FBXL19        | ENST00000562798 | chr16      | 30933637  | 30933638  | -738              |
| RXFP4         | ENST00000368318 | chr1       | 155910746 | 155910747 | -733              |
| JUNB          | ENST00000302754 | chr19      | 12901576  | 12901577  | -733              |
| C19orf10      | ENST00000596031 | chr19      | 4669438   | 4669439   | -732              |
| ATM           | ENST00000527805 | chr11      | 108092479 | 108092480 | -731              |
| TIGD3         | ENST00000309880 | chr11      | 65121516  | 65121517  | -721              |
| PSMB3         | ENST00000225426 | chr17      | 36908268  | 36908269  | -720              |
| DUSP7         | ENST00000495880 | chr3       | 52091283  | 52091284  | -719              |
| UHRF1         | ENST00000591733 | chr19      | 4908727   | 4908728   | -714              |
| BRI3BP        | ENST00000341446 | chr12      | 125477533 | 125477534 | -712              |
| STAT6         | ENST00000300134 | chr12      | 57505925  | 57505926  | -711              |
| MYC           | ENST00000259523 | chr8       | 128746968 | 128746969 | -711              |
| PRRC2A        | ENST00000376007 | chr6       | 31587787  | 31587788  | -709              |
| SLFNL1        | ENST00000372611 | chr1       | 41488115  | 41488116  | -702              |
| RP5-1065J22.4 | ENST00000429752 | chr1       | 109648088 | 109648089 | -702              |
| WAS           | ENST00000376701 | chrX       | 48541465  | 48541466  | -702              |
| DCAKD         | ENST00000588295 | chr17      | 43129728  | 43129729  | -701              |
| ARHGAP21      | ENST00000396432 | chr10      | 25013294  | 25013295  | -699              |
| CCNE1         | ENST00000262643 | chr19      | 30302107  | 30302108  | -697              |
| UBAP1         | ENST00000543944 | chr9       | 34178305  | 34178306  | -697              |
| RASGRP4       | ENST00000587287 | chr19      | 38902730  | 38902731  | -696              |
| RNase_MRP     | ENST00000516656 | chr2       | 161254173 | 161254174 | -696              |
| PARP3         | ENST00000475782 | chr3       | 51978106  | 51978107  | -696              |
| RP11-549L6.3  | ENST00000451656 | chr10      | 111969042 | 111969043 | -695              |
| RP1-85F18.5   | ENST00000420537 | chr22      | 41594152  | 41594153  | -694              |
| TESK1         | ENST00000467424 | chr9       | 35606282  | 35606283  | -686              |
| GATAD2A       | ENST00000457895 | chr19      | 19515919  | 19515920  | -685              |
| PLAC8         | ENST00000411416 | chr4       | 84031679  | 84031680  | -685              |
| AC005391.2    | ENST00000585647 | chr19      | 929493    | 929494    | -678              |
| APEH          | ENST00000296456 | chr3       | 49710756  | 49710757  | -678              |
| KAT5          | ENST00000525600 | chr11      | 65485144  | 65485145  | -670              |
| SPAG5         | ENST00000321765 | chr17      | 26926965  | 26926966  | -670              |
| TBX10         | ENST00000335385 | chr11      | 67407698  | 67407699  | -669              |
| FAM161A       | ENST00000405894 | chr2       | 62081943  | 62081944  | -667              |
| PIP5KL1       | ENST00000388747 | chr9       | 130693732 | 130693733 | -658              |
| ATM           | ENST00000531957 | chr11      | 108163455 | 108163456 | -656              |
| RP5-1033H22.2 | ENST00000412628 | chr1       | 94059294  | 94059295  | -647              |

**Supplemental Table 2: Genes with significant occupancy of E2F8 at the promoter regions (-5kb to+2kb)**

| <b>Gene Symbol</b> | <b>Ensembl ID</b> | <b>Chromosome</b> | <b>Start</b> | <b>End</b> | <b>distance from TSS</b> |
|--------------------|-------------------|-------------------|--------------|------------|--------------------------|
| RNF181             | ENST00000441634   | chr2              | 85822202     | 85822203   | -645                     |
| NUP160             | ENST00000526870   | chr11             | 47870746     | 47870747   | -641                     |
| FAM117B            | ENST00000303116   | chr2              | 203499261    | 203499262  | -639                     |
| VEZF1              | ENST00000583932   | chr17             | 56066256     | 56066257   | -638                     |
| MTHFD1             | ENST00000545908   | chr14             | 64854113     | 64854114   | -635                     |
| PPP6R3             | ENST00000393799   | chr11             | 68227554     | 68227555   | -631                     |
| MCFD2              | ENST00000444761   | chr2              | 47169622     | 47169623   | -630                     |
| TFRC               | ENST00000360110   | chr3              | 195809688    | 195809689  | -630                     |
| MNT                | ENST00000174618   | chr17             | 2305036      | 2305037    | -626                     |
| LINC00273          | ENST00000539813   | chr16             | 33963125     | 33963126   | -624                     |
| MYOCD              | ENST00000579237   | chr17             | 12568586     | 12568587   | -620                     |
| U6                 | ENST00000362733   | chr2              | 38373937     | 38373938   | -619                     |
| CAMK2N2            | ENST00000296238   | chr3              | 183979868    | 183979869  | -619                     |
| ELK3               | ENST00000228741   | chr12             | 96587541     | 96587542   | -618                     |
| RPRD2              | ENST00000401000   | chr1              | 150336510    | 150336511  | -615                     |
| LINC00273          | ENST00000567668   | chr16             | 33957728     | 33957729   | -615                     |
| GCHFR              | ENST00000260447   | chr15             | 41055605     | 41055606   | -612                     |
| ARL15              | ENST00000502271   | chr5              | 53607022     | 53607023   | -612                     |
| HERPUD2            | ENST00000396081   | chr7              | 35735354     | 35735355   | -611                     |
| TRIM26             | ENST00000453195   | chr6              | 30181811     | 30181812   | -609                     |
| GDI2               | ENST00000380191   | chr10             | 5856113      | 5856114    | -603                     |
| TRAPPC5            | ENST00000596148   | chr19             | 7745126      | 7745127    | -602                     |
| SRRM2-AS1          | ENST00000577055   | chr16             | 2801409      | 2801410    | -600                     |
| KIF11              | ENST00000260731   | chr10             | 94352444     | 94352445   | -598                     |
| ZNF146             | ENST00000456324   | chr19             | 36704905     | 36704906   | -598                     |
| DNAJB14            | ENST00000442697   | chr4              | 100868478    | 100868479  | -597                     |
| AP3D1              | ENST00000591284   | chr19             | 2165057      | 2165058    | -595                     |
| HIST1H4A           | ENST00000359907   | chr6              | 26021319     | 26021320   | -587                     |
| SERBP1             | ENST00000370994   | chr1              | 67896675     | 67896676   | -579                     |
| RBM14              | ENST00000310137   | chr11             | 66383473     | 66383474   | -579                     |
| ZNF335             | ENST00000426788   | chr20             | 44601405     | 44601406   | -574                     |
| UBE2QL1            | ENST00000399816   | chr5              | 6448162      | 6448163    | -573                     |
| DTYMK              | ENST00000305784   | chr2              | 242626976    | 242626977  | -572                     |
| COL7A1             | ENST00000328333   | chr3              | 48633269     | 48633270   | -571                     |
| PCIF1              | ENST00000372409   | chr20             | 44562701     | 44562702   | -565                     |
| HNRNPC             | ENST00000336053   | chr14             | 21738213     | 21738214   | -562                     |
| SIK2               | ENST00000304987   | chr11             | 111472556    | 111472557  | -558                     |
| ZBTB43             | ENST00000449886   | chr9              | 129566727    | 129566728  | -557                     |
| MAD2L1BP           | ENST00000372171   | chr6              | 43602999     | 43603000   | -556                     |
| KCTD21             | ENST00000525447   | chr11             | 77887900     | 77887901   | -554                     |

**Supplemental Table 2: Genes with significant occupancy of E2F8 at the promoter regions (-5kb to+2kb)**

| Gene Symbol   | Ensembl ID      | Chromosome | Start     | End       | distance from TSS |
|---------------|-----------------|------------|-----------|-----------|-------------------|
| WNK1          | ENST00000535572 | chr12      | 861205    | 861206    | -553              |
| SPEN          | ENST00000375759 | chr1       | 16173806  | 16173807  | -552              |
| LRR37A12P     | ENST00000454917 | chr1       | 32892939  | 32892940  | -551              |
| WARS          | ENST00000355338 | chr14      | 100843689 | 100843690 | -549              |
| GOLPH3        | ENST00000265070 | chr5       | 32175003  | 32175004  | -549              |
| EHMT1         | ENST00000495657 | chr9       | 140610997 | 140610998 | -549              |
| ABCF3         | ENST00000429586 | chr3       | 183903263 | 183903264 | -547              |
| ZNF131        | ENST00000503599 | chr5       | 43064730  | 43064731  | -547              |
| FAM9B         | ENST00000327220 | chrX       | 9002711   | 9002712   | -545              |
| DDX55         | ENST00000542286 | chr12      | 124086081 | 124086082 | -542              |
| SLC20A1       | ENST00000423633 | chr2       | 113404481 | 113404482 | -542              |
| ATP1B3        | ENST00000475483 | chr3       | 141594423 | 141594424 | -542              |
| MIR22HG       | ENST00000577164 | chr17      | 1621004   | 1621005   | -538              |
| AC006132.1    | ENST00000591087 | chr19      | 46144214  | 46144215  | -537              |
| CUL3          | ENST00000344951 | chr2       | 225450644 | 225450645 | -536              |
| UBE3C         | ENST00000348165 | chr7       | 156931070 | 156931071 | -536              |
| PPP2R5A       | ENST00000542178 | chr1       | 212458247 | 212458248 | -534              |
| RP11-333E13.4 | ENST00000381811 | chr4       | 40059351  | 40059352  | -534              |
| SIVA1         | ENST00000329967 | chr14      | 105218905 | 105218906 | -531              |
| COPS7B        | ENST00000474042 | chr2       | 232655785 | 232655786 | -528              |
| CXorf58       | ENST00000379211 | chrX       | 23925393  | 23925394  | -524              |
| SP1           | ENST00000551969 | chr12      | 53773436  | 53773437  | -523              |
| Metazoa_SRP   | ENST00000577467 | chr17      | 4268266   | 4268267   | -520              |
| NAA40         | ENST00000338447 | chr11      | 63705911  | 63705912  | -519              |
| ECE1          | ENST00000415912 | chr1       | 21672513  | 21672514  | -518              |
| STARD4        | ENST00000502322 | chr5       | 110848804 | 110848805 | -518              |
| C6orf99       | ENST00000367073 | chr6       | 159290436 | 159290437 | -517              |
| PHF19         | ENST00000373896 | chr9       | 123640120 | 123640121 | -516              |
| MST4          | ENST00000394334 | chrX       | 131156776 | 131156777 | -516              |
| C18orf56      | ENST00000323813 | chr18      | 658853    | 658854    | -515              |
| FOXN2         | ENST00000413569 | chr2       | 48541261  | 48541262  | -514              |
| ARRB1         | ENST00000529741 | chr11      | 74988466  | 74988467  | -513              |
| TRABD2A       | ENST00000474298 | chr2       | 85134642  | 85134643  | -512              |
| CNOT1         | ENST00000317147 | chr16      | 58664297  | 58664298  | -509              |
| RP11-423C15.3 | ENST00000444800 | chr9       | 128508523 | 128508524 | -506              |
| SEMA4B        | ENST00000559300 | chr15      | 90727646  | 90727647  | -503              |
| SENP3         | ENST00000578868 | chr17      | 7464688   | 7464689   | -503              |
| NEK8          | ENST00000579671 | chr17      | 27052416  | 27052417  | -498              |
| KHSRP         | ENST00000398148 | chr19      | 6425300   | 6425301   | -497              |
| ATOX1         | ENST00000524142 | chr5       | 151152588 | 151152589 | -497              |

**Supplemental Table 2: Genes with significant occupancy of E2F8 at the promoter regions (-5kb to+2kb)**

| Gene Symbol    | Ensembl ID      | Chromosome | Start     | End       | distance from TSS |
|----------------|-----------------|------------|-----------|-----------|-------------------|
| ARFGEF2        | ENST00000371917 | chr20      | 47537939  | 47537940  | -487              |
| ZNF575         | ENST00000598080 | chr19      | 44036629  | 44036630  | -486              |
| SLFNL1         | ENST00000359345 | chr1       | 41489390  | 41489391  | -483              |
| AGFG2          | ENST00000430857 | chr7       | 100136350 | 100136351 | -483              |
| PAWR           | ENST00000328827 | chr12      | 80085356  | 80085357  | -481              |
| KATNAL1        | ENST00000380615 | chr13      | 30882099  | 30882100  | -480              |
| RP11-169L17.3  | ENST00000416158 | chrX       | 40621000  | 40621001  | -479              |
| SPSB1          | ENST00000450402 | chr1       | 9354113   | 9354114   | -473              |
| LA16c-325D7.2  | ENST00000575693 | chr16      | 2918090   | 2918091   | -473              |
| NBL1           | ENST00000289749 | chr1       | 19969256  | 19969257  | -469              |
| RP11-386G11.10 | ENST00000547712 | chr12      | 49524485  | 49524486  | -468              |
| FAM208A        | ENST00000355628 | chr3       | 56717731  | 56717732  | -468              |
| IGF2BP3        | ENST00000468263 | chr7       | 23508011  | 23508012  | -468              |
| AOAH           | ENST00000471806 | chr7       | 36554748  | 36554749  | -468              |
| OLFM1          | ENST00000277415 | chr9       | 137966801 | 137966802 | -466              |
| USP1           | ENST00000452143 | chr1       | 62901502  | 62901503  | -465              |
| RNA5SP346      | ENST00000363541 | chr11      | 96208319  | 96208320  | -465              |
| PPP1R12B       | ENST00000406302 | chr1       | 202317363 | 202317364 | -463              |
| TNRC6B         | ENST00000454349 | chr22      | 40573465  | 40573466  | -463              |
| BTBD10         | ENST00000528120 | chr11      | 13485301  | 13485302  | -459              |
| KRT86          | ENST00000544024 | chr12      | 52642624  | 52642625  | -459              |
| IWS1           | ENST00000409725 | chr2       | 128284919 | 128284920 | -459              |
| GNAZ           | ENST00000248996 | chr22      | 23412081  | 23412082  | -458              |
| RP11-446E9.1   | ENST00000435260 | chr8       | 56964222  | 56964223  | -458              |
| HIST1H2BD      | ENST00000377777 | chr6       | 26157891  | 26157892  | -457              |
| IGF2BP3        | ENST00000258729 | chr7       | 23510541  | 23510542  | -457              |
| AP1S2          | ENST00000329235 | chrX       | 15873509  | 15873510  | -457              |
| PPM1D          | ENST00000305921 | chr17      | 58677088  | 58677089  | -455              |
| RP1-85F18.5    | ENST00000420537 | chr22      | 41593912  | 41593913  | -454              |
| UBA7           | ENST00000333486 | chr3       | 49851829  | 49851830  | -452              |
| STRN           | ENST00000263918 | chr2       | 37194061  | 37194062  | -448              |
| TFB1M          | ENST00000475849 | chr6       | 155636073 | 155636074 | -448              |
| OCIAD1         | ENST00000509122 | chr4       | 48832572  | 48832573  | -442              |
| AGTRAP         | ENST00000376637 | chr1       | 11795700  | 11795701  | -440              |
| CLIP1          | ENST00000537178 | chr12      | 122907614 | 122907615 | -437              |
| GK             | ENST00000378946 | chrX       | 30671039  | 30671040  | -436              |
| CYP39A1        | ENST00000480804 | chr6       | 46606055  | 46606056  | -435              |
| UBE2N          | ENST00000318066 | chr12      | 93836469  | 93836470  | -433              |
| NEDD4          | ENST00000435532 | chr15      | 56286375  | 56286376  | -433              |
| HMGN4          | ENST00000328219 | chr6       | 26538138  | 26538139  | -433              |

**Supplemental Table 2: Genes with significant occupancy of E2F8 at the promoter regions (-5kb to+2kb)**

| Gene Symbol   | Ensembl ID      | Chromosome | Start     | End       | distance from TSS |
|---------------|-----------------|------------|-----------|-----------|-------------------|
| CHAMP1        | ENST00000361283 | chr13      | 115079555 | 115079556 | -432              |
| KHDRBS1       | ENST00000327300 | chr1       | 32478999  | 32479000  | -430              |
| EIF4EBP2      | ENST00000373218 | chr10      | 72163705  | 72163706  | -429              |
| FLAD1         | ENST00000492620 | chr1       | 154955385 | 154955386 | -428              |
| RP11-59H1.3   | ENST00000540583 | chr12      | 12878423  | 12878424  | -427              |
| CREBRF        | ENST00000540014 | chr5       | 172482927 | 172482928 | -427              |
| E2F3          | ENST00000346618 | chr6       | 20401971  | 20401972  | -426              |
| N4BP2         | ENST00000261435 | chr4       | 40058020  | 40058021  | -425              |
| TXNIP         | ENST00000369317 | chr1       | 145438044 | 145438045 | -424              |
| HYAL3         | ENST00000336307 | chr3       | 50337318  | 50337319  | -421              |
| ABCD3         | ENST00000394233 | chr1       | 94883512  | 94883513  | -420              |
| HIST2H2AB     | ENST00000331128 | chr1       | 149859884 | 149859885 | -420              |
| HCN3          | ENST00000368358 | chr1       | 155246955 | 155246956 | -418              |
| SLC25A6       | ENST00000447786 | chrX       | 1512042   | 1512043   | -418              |
| SPRTN         | ENST00000391858 | chr1       | 231472432 | 231472433 | -417              |
| EPB41L5       | ENST00000263713 | chr2       | 120770164 | 120770165 | -416              |
| SLC29A1       | ENST00000371740 | chr6       | 44190886  | 44190887  | -415              |
| FAM168A       | ENST00000064778 | chr11      | 73309646  | 73309647  | -414              |
| ANO6          | ENST00000426898 | chr12      | 45609357  | 45609358  | -412              |
| KIF2A         | ENST00000401507 | chr5       | 61601576  | 61601577  | -412              |
| CNOT8         | ENST00000521174 | chr5       | 154236702 | 154236703 | -410              |
| PRPF6         | ENST00000266079 | chr20      | 62612079  | 62612080  | -408              |
| CANX          | ENST00000514383 | chr5       | 179105221 | 179105222 | -407              |
| HNRNPF        | ENST00000337970 | chr10      | 43905018  | 43905019  | -406              |
| APOA1BP       | ENST00000488840 | chr1       | 156562662 | 156562663 | -404              |
| RP11-631N16.2 | ENST00000550290 | chr12      | 62996127  | 62996128  | -404              |
| C12orf73      | ENST00000547945 | chr12      | 104351453 | 104351454 | -404              |
| ARHGAP39      | ENST00000540274 | chr8       | 145911594 | 145911595 | -402              |
| MRPS28        | ENST00000521605 | chr8       | 80942923  | 80942924  | -401              |
| PRR24         | ENST00000552360 | chr19      | 47777741  | 47777742  | -400              |
| XPO1          | ENST00000443240 | chr2       | 61766157  | 61766158  | -398              |
| TBCA          | ENST00000380377 | chr5       | 77072581  | 77072582  | -398              |
| SPAG5         | ENST00000321765 | chr17      | 26926691  | 26926692  | -396              |
| PRPS1         | ENST00000372435 | chrX       | 106871340 | 106871341 | -396              |
| 7SK           | ENST00000410327 | chr9       | 34049569  | 34049570  | -394              |
| SLC25A14      | ENST00000495156 | chrX       | 129473479 | 129473480 | -394              |
| ANK3          | ENST00000459732 | chr10      | 61824441  | 61824442  | -393              |
| RBM3          | ENST00000472897 | chrX       | 48432443  | 48432444  | -393              |
| SUV420H2      | ENST00000255613 | chr19      | 55850830  | 55850831  | -390              |
| SP4           | ENST00000222584 | chr7       | 21467261  | 21467262  | -390              |



**Supplemental Table 2: Genes with significant occupancy of E2F8 at the promoter regions (-5kb to+2kb)**

| Gene Symbol   | Ensembl ID      | Chromosome | Start     | End       | distance from TSS |
|---------------|-----------------|------------|-----------|-----------|-------------------|
| STIL          | ENST00000396221 | chr1       | 47779193  | 47779194  | -388              |
| AHCYL2        | ENST00000325006 | chr7       | 128864475 | 128864476 | -388              |
| RP11-292F22.4 | ENST00000453605 | chr10      | 47555778  | 47555779  | -386              |
| PMAIP1        | ENST00000316660 | chr18      | 57566793  | 57566794  | -386              |
| MCAT          | ENST00000290429 | chr22      | 43539784  | 43539785  | -386              |
| PIM1          | ENST00000373509 | chr6       | 37137593  | 37137594  | -385              |
| SBF2          | ENST00000256190 | chr11      | 10316136  | 10316137  | -384              |
| EZH1          | ENST00000435174 | chr17      | 40897452  | 40897453  | -383              |
| SNX8          | ENST00000222990 | chr7       | 2354480   | 2354481   | -383              |
| ZFP62         | ENST00000359141 | chr5       | 180288666 | 180288667 | -382              |
| SLC35B2       | ENST00000393810 | chr6       | 44225670  | 44225671  | -381              |
| CDC14B        | ENST00000474602 | chr9       | 99382490  | 99382491  | -380              |
| AGPAT3        | ENST00000479117 | chr21      | 45379284  | 45379285  | -379              |
| GNAI3         | ENST00000369851 | chr1       | 110090855 | 110090856 | -377              |
| SNX24         | ENST00000261369 | chr5       | 122180767 | 122180768 | -376              |
| MPI           | ENST00000569931 | chr15      | 75181970  | 75181971  | -375              |
| BACE1         | ENST00000528053 | chr11      | 117187346 | 117187347 | -373              |
| MAP3K7        | ENST00000369329 | chr6       | 91297135  | 91297136  | -373              |
| UHRF1         | ENST00000591733 | chr19      | 4909069   | 4909070   | -372              |
| RAB8A         | ENST00000300935 | chr19      | 16222066  | 16222067  | -372              |
| PUM2          | ENST00000420234 | chr2       | 20550964  | 20550965  | -371              |
| TCP11L2       | ENST00000553143 | chr12      | 106695336 | 106695337 | -370              |
| STXBP5-AS1    | ENST00000417502 | chr6       | 147523968 | 147523969 | -367              |
| INTS4         | ENST00000534064 | chr11      | 77706088  | 77706089  | -366              |
| E2F1          | ENST00000343380 | chr20      | 32274574  | 32274575  | -366              |
| PHF14         | ENST00000445996 | chr7       | 11013132  | 11013133  | -366              |
| LMNA          | ENST00000347559 | chr1       | 156084095 | 156084096 | -365              |
| SEC24A        | ENST00000398844 | chr5       | 133984113 | 133984114 | -365              |
| ANXA4         | ENST00000394295 | chr2       | 69968742  | 69968743  | -363              |
| DGCR8         | ENST00000383024 | chr22      | 20067392  | 20067393  | -362              |
| TUBB          | ENST00000330914 | chr6       | 30688990  | 30688991  | -360              |
| PM20D2        | ENST00000275072 | chr6       | 89855408  | 89855409  | -360              |
| AP1S1         | ENST00000337619 | chr7       | 100797317 | 100797318 | -360              |
| THBS3         | ENST00000460050 | chr1       | 155173453 | 155173454 | -359              |
| RAB6A         | ENST00000310653 | chr11      | 73472539  | 73472540  | -359              |
| ZNF446        | ENST00000599913 | chr19      | 58985847  | 58985848  | -359              |
| P4HTM         | ENST00000383729 | chr3       | 49026960  | 49026961  | -358              |
| RASA2         | ENST00000515549 | chr3       | 141205530 | 141205531 | -358              |
| ACTR10        | ENST00000545307 | chr14      | 58666440  | 58666441  | -357              |
| PURA          | ENST00000331327 | chr5       | 139493351 | 139493352 | -356              |

**Supplemental Table 2: Genes with significant occupancy of E2F8 at the promoter regions (-5kb to+2kb)**

| Gene Symbol   | Ensembl ID      | Chromosome | Start     | End       | distance from TSS |
|---------------|-----------------|------------|-----------|-----------|-------------------|
| CDC42SE2      | ENST00000511432 | chr5       | 130588364 | 130588365 | -355              |
| RIC8B         | ENST00000392837 | chr12      | 107168021 | 107168022 | -351              |
| RP11-380O24.1 | ENST00000518331 | chr3       | 9405336   | 9405337   | -351              |
| UNC119        | ENST00000484980 | chr17      | 26879168  | 26879169  | -350              |
| NUP214        | ENST00000359428 | chr9       | 134000598 | 134000599 | -349              |
| UBE2Q1        | ENST00000497453 | chr1       | 154531850 | 154531851 | -348              |
| PABPC4L       | ENST00000421491 | chr4       | 135123248 | 135123249 | -347              |
| TMEM56        | ENST00000370203 | chr1       | 95582547  | 95582548  | -346              |
| TEX10         | ENST00000374902 | chr9       | 103115565 | 103115566 | -346              |
| FDXR          | ENST00000442102 | chr17      | 72869497  | 72869498  | -343              |
| EPB41L2       | ENST00000337057 | chr6       | 131384802 | 131384803 | -342              |
| SGK3          | ENST00000521960 | chr8       | 67687107  | 67687108  | -341              |
| C3orf37       | ENST00000509042 | chr3       | 128997330 | 128997331 | -340              |
| PPP6R3        | ENST00000393799 | chr11      | 68227847  | 68227848  | -338              |
| TMEM120B      | ENST00000342607 | chr12      | 122150319 | 122150320 | -338              |
| CTD-2574D22.6 | ENST00000562285 | chr16      | 29828221  | 29828222  | -338              |
| SUZ12P        | ENST00000497969 | chr17      | 29058385  | 29058386  | -338              |
| TEC           | ENST00000506752 | chr4       | 48231013  | 48231014  | -338              |
| GLI3          | ENST00000437480 | chr7       | 42276994  | 42276995  | -338              |
| HDGFRP2       | ENST00000301284 | chr19      | 4471947   | 4471948   | -336              |
| LRPPRC        | ENST00000260665 | chr2       | 44223478  | 44223479  | -336              |
| CHMP2B        | ENST00000471660 | chr3       | 87276084  | 87276085  | -336              |
| PPP1CC        | ENST00000340766 | chr12      | 111181077 | 111181078 | -335              |
| MED6          | ENST00000256379 | chr14      | 71067717  | 71067718  | -335              |
| NDUFV2        | ENST00000318388 | chr18      | 9102292   | 9102293   | -335              |
| TRA2A         | ENST00000297071 | chr7       | 23571993  | 23571994  | -335              |
| PDHA1         | ENST00000540249 | chrX       | 19361676  | 19361677  | -334              |
| CCDC30        | ENST00000475614 | chr1       | 42928667  | 42928668  | -333              |
| RBBP7         | ENST00000465042 | chrX       | 16887546  | 16887547  | -332              |
| C2orf44       | ENST00000406895 | chr2       | 24270560  | 24270561  | -331              |
| RP11-145A3.1  | ENST00000448264 | chr1       | 225887975 | 225887976 | -330              |
| RFX1          | ENST00000589239 | chr19      | 14117462  | 14117463  | -330              |
| GBAP1         | ENST00000313929 | chr1       | 155197541 | 155197542 | -329              |
| ZMYND19       | ENST00000298585 | chr9       | 140485269 | 140485270 | -329              |
| TPX2          | ENST00000300403 | chr20      | 30326745  | 30326746  | -328              |
| SIN3A         | ENST00000565264 | chr15      | 75744412  | 75744413  | -327              |
| STAT2         | ENST00000557417 | chr12      | 56754262  | 56754263  | -325              |
| CTD-2035E11.3 | ENST00000509036 | chr5       | 43018205  | 43018206  | -325              |
| NEK4          | ENST00000233027 | chr3       | 52805285  | 52805286  | -322              |
| DDX23         | ENST00000308025 | chr12      | 49246265  | 49246266  | -321              |

**Supplemental Table 2: Genes with significant occupancy of E2F8 at the promoter regions (-5kb to+2kb)**

| Gene Symbol    | Ensembl ID      | Chromosome | Start     | End       | distance from TSS |
|----------------|-----------------|------------|-----------|-----------|-------------------|
| HMGB2          | ENST00000511316 | chr4       | 174255902 | 174255903 | -321              |
| CSTF2T         | ENST00000331173 | chr10      | 53459672  | 53459673  | -319              |
| KAT6B          | ENST00000372724 | chr10      | 76586038  | 76586039  | -319              |
| PNN            | ENST00000553331 | chr14      | 39644068  | 39644069  | -318              |
| TAOK2          | ENST00000308893 | chr16      | 29984643  | 29984644  | -318              |
| NUCKS1         | ENST00000367142 | chr1       | 205719719 | 205719720 | -317              |
| EFCAB12        | ENST00000505956 | chr3       | 129147809 | 129147810 | -317              |
| PIGM           | ENST00000368090 | chr1       | 160002096 | 160002097 | -315              |
| TMEM245        | ENST00000374586 | chr9       | 111882538 | 111882539 | -315              |
| C6orf62        | ENST00000378119 | chr6       | 24721375  | 24721376  | -313              |
| SLC1A5         | ENST00000542575 | chr19      | 47292161  | 47292162  | -312              |
| CTD-2616J11.14 | ENST00000600765 | chr19      | 51897429  | 51897430  | -312              |
| CYB5P4         | ENST00000396692 | chr20      | 22867015  | 22867016  | -311              |
| KIAA2018       | ENST00000491165 | chr3       | 113415802 | 113415803 | -311              |
| PGAP1          | ENST00000374738 | chr2       | 197791777 | 197791778 | -310              |
| TXNRD2         | ENST00000491939 | chr22      | 19921357  | 19921358  | -310              |
| PDS5A          | ENST00000303538 | chr4       | 39979884  | 39979885  | -310              |
| CALU           | ENST00000535623 | chr7       | 128379036 | 128379037 | -309              |
| BUB3           | ENST00000368865 | chr10      | 124913486 | 124913487 | -306              |
| LEMD3          | ENST00000308330 | chr12      | 65563044  | 65563045  | -306              |
| CTD-2319I12.4  | ENST00000590744 | chr17      | 58212663  | 58212664  | -306              |
| ARL6IP6        | ENST00000455875 | chr2       | 153575126 | 153575127 | -306              |
| TRIM37         | ENST00000393066 | chr17      | 57184585  | 57184586  | -305              |
| CDKN2D         | ENST00000335766 | chr19      | 10680038  | 10680039  | -305              |
| VANGL1         | ENST00000355485 | chr1       | 116184269 | 116184270 | -304              |
| TMEM55B        | ENST00000250489 | chr14      | 20930073  | 20930074  | -304              |
| SNRNP200       | ENST00000349783 | chr2       | 96971599  | 96971600  | -304              |
| U6             | ENST00000517104 | chr4       | 48935173  | 48935174  | -304              |
| PKN2           | ENST00000495119 | chr1       | 89298308  | 89298309  | -303              |
| CTD-2659N19.9  | ENST00000590065 | chr19      | 12896214  | 12896215  | -301              |
| ZNF613         | ENST00000593395 | chr19      | 52430098  | 52430099  | -301              |
| ARHGEF40       | ENST00000298694 | chr14      | 21538128  | 21538129  | -300              |
| HNRNPUL1       | ENST00000392006 | chr19      | 41769935  | 41769936  | -300              |
| CTC-250I14.6   | ENST00000592882 | chr19      | 13265304  | 13265305  | -299              |
| AEN            | ENST00000332810 | chr15      | 89164228  | 89164229  | -298              |
| MRPL53         | ENST00000409710 | chr2       | 74700110  | 74700111  | -298              |
| ERGIC3         | ENST00000348547 | chr20      | 34129472  | 34129473  | -297              |
| POM121         | ENST00000434423 | chr7       | 72395362  | 72395363  | -297              |
| MLF1IP         | ENST00000514781 | chr4       | 185654861 | 185654862 | -295              |
| SNORD118       | ENST00000363593 | chr17      | 8077197   | 8077198   | -294              |

**Supplemental Table 2: Genes with significant occupancy of E2F8 at the promoter regions (-5kb to+2kb)**

| Gene Symbol   | Ensembl ID      | Chromosome | Start     | End       | distance from TSS |
|---------------|-----------------|------------|-----------|-----------|-------------------|
| BANP          | ENST00000286122 | chr16      | 87984745  | 87984746  | -292              |
| TMEM57        | ENST00000399763 | chr1       | 25757096  | 25757097  | -291              |
| EIF4A1        | ENST00000580888 | chr17      | 7475732   | 7475733   | -291              |
| ZNF45         | ENST00000588432 | chr19      | 44439719  | 44439720  | -291              |
| FLCN          | ENST00000389171 | chr17      | 17140788  | 17140789  | -288              |
| PIAS3         | ENST00000393045 | chr1       | 145575701 | 145575702 | -287              |
| PRRC2A        | ENST00000376007 | chr6       | 31588209  | 31588210  | -287              |
| PHF20         | ENST00000461122 | chr20      | 34359609  | 34359610  | -286              |
| C3orf58       | ENST00000315691 | chr3       | 143690353 | 143690354 | -286              |
| HNRNPA0       | ENST00000314940 | chr5       | 137090322 | 137090323 | -285              |
| HLTF          | ENST00000494055 | chr3       | 148804623 | 148804624 | -284              |
| TRA2B         | ENST00000471134 | chr3       | 185654670 | 185654671 | -284              |
| SETX          | ENST00000224140 | chr9       | 135230654 | 135230655 | -284              |
| PSMA5         | ENST00000538610 | chr1       | 109969343 | 109969344 | -283              |
| WBP1L         | ENST00000448841 | chr10      | 104503443 | 104503444 | -283              |
| FCHSD2        | ENST00000409418 | chr11      | 72853586  | 72853587  | -282              |
| TMEM120B      | ENST00000333310 | chr12      | 122215398 | 122215399 | -282              |
| DAPK3         | ENST00000596311 | chr19      | 3971400   | 3971401   | -281              |
| CDCA7L        | ENST00000406877 | chr7       | 21985981  | 21985982  | -281              |
| KRT7          | ENST00000548657 | chr12      | 52638943  | 52638944  | -279              |
| RP11-544I20.2 | ENST00000359491 | chr14      | 64805594  | 64805595  | -279              |
| CASP2         | ENST00000310447 | chr7       | 142985029 | 142985030 | -278              |
| FH            | ENST00000366560 | chr1       | 241683336 | 241683337 | -277              |
| DHTKD1        | ENST00000263035 | chr10      | 12110693  | 12110694  | -277              |
| CTNND1        | ENST00000530720 | chr11      | 57573717  | 57573718  | -277              |
| SUZ12         | ENST00000322652 | chr17      | 30263760  | 30263761  | -276              |
| SRSF1         | ENST00000258962 | chr17      | 56084981  | 56084982  | -276              |
| PHF1          | ENST00000427004 | chr6       | 33377900  | 33377901  | -275              |
| AC090571.1    | ENST00000544355 | chr8       | 41820457  | 41820458  | -275              |
| CLTC          | ENST00000269122 | chr17      | 57696944  | 57696945  | -274              |
| ING3          | ENST00000315870 | chr7       | 120590528 | 120590529 | -274              |
| MIR3124       | ENST00000582636 | chr1       | 249120302 | 249120303 | -273              |
| ABHD6         | ENST00000478253 | chr3       | 58222959  | 58222960  | -273              |
| ZBTB5         | ENST00000307750 | chr9       | 37465667  | 37465668  | -273              |
| EBNA1BP2      | ENST00000431635 | chr1       | 43638511  | 43638512  | -272              |
| SLMAP         | ENST00000295951 | chr3       | 57741684  | 57741685  | -272              |
| FOXN2         | ENST00000413569 | chr2       | 48541504  | 48541505  | -271              |
| NCOA6         | ENST00000359003 | chr20      | 33413721  | 33413722  | -271              |
| MRPS18A       | ENST00000372133 | chr6       | 43655797  | 43655798  | -271              |
| PHLDB1        | ENST00000530994 | chr11      | 118478060 | 118478061 | -269              |

**Supplemental Table 2: Genes with significant occupancy of E2F8 at the promoter regions (-5kb to+2kb)**

| <b>Gene Symbol</b> | <b>Ensembl ID</b> | <b>Chromosome</b> | <b>Start</b> | <b>End</b> | <b>distance from TSS</b> |
|--------------------|-------------------|-------------------|--------------|------------|--------------------------|
| RP11-216B9.8       | ENST00000427246   | chr9              | 131448350    | 131448351  | -269                     |
| PMM1               | ENST00000216259   | chr22             | 41986160     | 41986161   | -268                     |
| DEDD               | ENST00000392188   | chr1              | 161102743    | 161102744  | -267                     |
| SLC2A4             | ENST00000317370   | chr17             | 7184718      | 7184719    | -267                     |
| RRM2               | ENST00000360566   | chr2              | 10262187     | 10262188   | -267                     |
| GPR146             | ENST00000444847   | chr7              | 1083944      | 1083945    | -267                     |
| CRTAP              | ENST00000320954   | chr3              | 33155204     | 33155205   | -266                     |
| C9orf156           | ENST00000375119   | chr9              | 100685116    | 100685117  | -266                     |
| PANX1              | ENST00000227638   | chr11             | 93861828     | 93861829   | -265                     |
| HRH4               | ENST00000256906   | chr18             | 22040327     | 22040328   | -265                     |
| GAS6               | ENST00000357389   | chr13             | 114567308    | 114567309  | -264                     |
| ABCB6              | ENST00000265316   | chr2              | 220083973    | 220083974  | -263                     |
| SLC25A36           | ENST00000446041   | chr3              | 140660408    | 140660409  | -263                     |
| IMPG1              | ENST00000369952   | chr6              | 76645027     | 76645028   | -263                     |
| KCNH4              | ENST00000264661   | chr17             | 40333556     | 40333557   | -262                     |
| DCAF7              | ENST00000310827   | chr17             | 61627559     | 61627560   | -262                     |
| TPM3               | ENST00000509409   | chr1              | 154155962    | 154155963  | -261                     |
| HERC5              | ENST00000264350   | chr4              | 89378006     | 89378007   | -261                     |
| TRIM26             | ENST00000453195   | chr6              | 30181463     | 30181464   | -261                     |
| AMIGO1             | ENST00000369862   | chr1              | 110052618    | 110052619  | -260                     |
| YWHAB              | ENST00000353703   | chr20             | 43514056     | 43514057   | -260                     |
| HMGXB4             | ENST00000420166   | chr22             | 35653184     | 35653185   | -260                     |
| RNU6ATAC           | ENST00000408749   | chr9              | 137029944    | 137029945  | -260                     |
| RRP7A              | ENST00000323013   | chr22             | 42916065     | 42916066   | -259                     |
| HMGCS1             | ENST00000433297   | chr5              | 43313871     | 43313872   | -259                     |
| YIF1A              | ENST00000376901   | chr11             | 66056897     | 66056898   | -258                     |
| TACO1              | ENST00000258975   | chr17             | 61677973     | 61677974   | -257                     |
| POLR1E             | ENST00000377798   | chr9              | 37485676     | 37485677   | -255                     |
| PFN1               | ENST00000574872   | chr17             | 4851016      | 4851017    | -254                     |
| NCOA5              | ENST00000290231   | chr20             | 44718843     | 44718844   | -254                     |
| G3BP1              | ENST00000394123   | chr5              | 151151216    | 151151217  | -254                     |
| EGR3               | ENST00000317216   | chr8              | 22551067     | 22551068   | -254                     |
| ARNTL2             | ENST00000544915   | chr12             | 27485533     | 27485534   | -253                     |
| BRMS1L             | ENST00000216807   | chr14             | 36295270     | 36295271   | -253                     |
| XPO1               | ENST00000449444   | chr2              | 61763974     | 61763975   | -253                     |
| C6orf47            | ENST00000375911   | chr6              | 31628800     | 31628801   | -253                     |
| CCNE2              | ENST00000308108   | chr8              | 95907735     | 95907736   | -253                     |
| UFM1               | ENST00000494372   | chr13             | 38923733     | 38923734   | -252                     |
| MYLPF              | ENST00000563718   | chr16             | 30382002     | 30382003   | -252                     |
| KIAA0947           | ENST00000296564   | chr5              | 5422554      | 5422555    | -252                     |

**Supplemental Table 2: Genes with significant occupancy of E2F8 at the promoter regions (-5kb to+2kb)**

| Gene Symbol   | Ensembl ID      | Chromosome | Start     | End       | distance from TSS |
|---------------|-----------------|------------|-----------|-----------|-------------------|
| ERI3          | ENST00000452396 | chr1       | 44821181  | 44821182  | -251              |
| TMX1          | ENST00000555574 | chr14      | 51706628  | 51706629  | -251              |
| UXT           | ENST00000333119 | chrX       | 47518809  | 47518810  | -251              |
| ITPRIP        | ENST00000337478 | chr10      | 106098410 | 106098411 | -250              |
| GPR180        | ENST00000376958 | chr13      | 95253906  | 95253907  | -250              |
| U2AF2         | ENST00000450554 | chr19      | 56165261  | 56165262  | -250              |
| RP11-37N22.1  | ENST00000523703 | chr8       | 125259887 | 125259888 | -250              |
| RPL41         | ENST00000546591 | chr12      | 56510120  | 56510121  | -249              |
| CHAF1A        | ENST00000301280 | chr19      | 4402409   | 4402410   | -249              |
| NAIF1         | ENST00000373078 | chr9       | 130829847 | 130829848 | -249              |
| DLX6          | ENST00000493273 | chr7       | 96635556  | 96635557  | -248              |
| DSCC1         | ENST00000313655 | chr8       | 120868496 | 120868497 | -248              |
| VCP           | ENST00000448530 | chr9       | 35072870  | 35072871  | -248              |
| RP11-199F11.2 | ENST00000571370 | chr17      | 7589934   | 7589935   | -247              |
| AC069277.2    | ENST00000342990 | chr3       | 6549220   | 6549221   | -247              |
| SMUG1         | ENST00000508394 | chr12      | 54583022  | 54583023  | -246              |
| SYDE1         | ENST00000342784 | chr19      | 15217967  | 15217968  | -246              |
| FAM185A       | ENST00000442873 | chr7       | 102389172 | 102389173 | -245              |
| TMEM74        | ENST00000297459 | chr8       | 109800087 | 109800088 | -245              |
| MMD           | ENST00000262065 | chr17      | 53499595  | 53499596  | -244              |
| STRADA        | ENST00000392950 | chr17      | 61819572  | 61819573  | -244              |
| LGR4          | ENST00000389858 | chr11      | 27494563  | 27494564  | -243              |
| FKBP5         | ENST00000357266 | chr6       | 35656960  | 35656961  | -243              |
| STIL          | ENST00000337817 | chr1       | 47780059  | 47780060  | -242              |
| RNU6-1        | ENST00000383898 | chr15      | 68132623  | 68132624  | -242              |
| TESK2         | ENST00000451835 | chr1       | 45957111  | 45957112  | -241              |
| B3GAT3        | ENST00000265471 | chr11      | 62389886  | 62389887  | -241              |
| DLG4          | ENST00000451807 | chr17      | 7117469   | 7117470   | -240              |
| CY5R4         | ENST00000369681 | chr6       | 84569122  | 84569123  | -239              |
| PDE4DIP       | ENST00000479408 | chr1       | 144932788 | 144932789 | -238              |
| DKFZP779L1853 | ENST00000595310 | chr12      | 48591931  | 48591932  | -238              |
| TSPAN3        | ENST00000267970 | chr15      | 77363806  | 77363807  | -238              |
| HSPBAP1       | ENST00000306103 | chr3       | 122512907 | 122512908 | -238              |
| CDK5RAP2      | ENST00000491334 | chr9       | 123342684 | 123342685 | -238              |
| DCAF15        | ENST00000254337 | chr19      | 14063066  | 14063067  | -237              |
| LRRCC1        | ENST00000360375 | chr8       | 86019145  | 86019146  | -236              |
| CA5BP1        | ENST00000380334 | chrX       | 15693432  | 15693433  | -236              |
| LRRC59        | ENST00000225972 | chr17      | 48475147  | 48475148  | -235              |
| ZNF580        | ENST00000543039 | chr19      | 56153182  | 56153183  | -235              |
| RP1-74B13.2   | ENST00000551161 | chr12      | 111269348 | 111269349 | -234              |

**Supplemental Table 2: Genes with significant occupancy of E2F8 at the promoter regions (-5kb to+2kb)**

| Gene Symbol   | Ensembl ID      | Chromosome | Start     | End       | distance from TSS |
|---------------|-----------------|------------|-----------|-----------|-------------------|
| ARID3B        | ENST00000346246 | chr15      | 74833283  | 74833284  | -234              |
| FBXL20        | ENST00000577399 | chr17      | 37559008  | 37559009  | -234              |
| PTER          | ENST00000343656 | chr10      | 16478730  | 16478731  | -233              |
| EEF1G         | ENST00000532986 | chr11      | 62341789  | 62341790  | -233              |
| FANCC         | ENST00000474949 | chr9       | 98080222  | 98080223  | -233              |
| FANCL         | ENST00000449070 | chr2       | 58468737  | 58468738  | -232              |
| RPS6KC1       | ENST00000543470 | chr1       | 213224357 | 213224358 | -231              |
| PSMC3         | ENST00000530912 | chr11      | 47448222  | 47448223  | -231              |
| RAD52         | ENST00000358495 | chr12      | 1059117   | 1059118   | -231              |
| MFN2          | ENST00000444836 | chr1       | 12040007  | 12040008  | -230              |
| GABARAP       | ENST00000302386 | chr17      | 7146317   | 7146318   | -230              |
| RP4-669P10.18 | ENST00000416037 | chr22      | 42486706  | 42486707  | -230              |
| TNIP1         | ENST00000521001 | chr5       | 150473366 | 150473367 | -230              |
| ZNF687        | ENST00000443959 | chr1       | 151253864 | 151253865 | -229              |
| MTR           | ENST00000366577 | chr1       | 236958380 | 236958381 | -229              |
| AC019205.1    | ENST00000584443 | chr6       | 73972501  | 73972502  | -229              |
| RPS14         | ENST00000407193 | chr5       | 149829545 | 149829546 | -228              |
| USP4          | ENST00000491791 | chr3       | 49378370  | 49378371  | -227              |
| MBIP          | ENST00000556427 | chr14      | 36789300  | 36789301  | -226              |
| STAP2         | ENST00000599736 | chr19      | 4343007   | 4343008   | -226              |
| ZBTB7B        | ENST00000535420 | chr1       | 154974901 | 154974902 | -225              |
| SMS           | ENST00000404933 | chrX       | 21958465  | 21958466  | -225              |
| SLC38A1       | ENST00000552197 | chr12      | 46661705  | 46661706  | -223              |
| RNASEH2A      | ENST00000221486 | chr19      | 12917170  | 12917171  | -223              |
| PACSIN2       | ENST00000263246 | chr22      | 43411372  | 43411373  | -223              |
| BRD2          | ENST00000395287 | chr6       | 32940283  | 32940284  | -223              |
| NENF          | ENST00000366988 | chr1       | 212606006 | 212606007 | -222              |
| CCDC97        | ENST00000596882 | chr19      | 41816483  | 41816484  | -222              |
| FNBP4         | ENST00000542975 | chr11      | 47789214  | 47789215  | -221              |
| TAF15         | ENST00000588240 | chr17      | 34136237  | 34136238  | -221              |
| GTPBP1        | ENST00000216044 | chr22      | 39101506  | 39101507  | -221              |
| MCM4          | ENST00000523944 | chr8       | 48873236  | 48873237  | -221              |
| CASP8AP2      | ENST00000552401 | chr6       | 90539392  | 90539393  | -220              |
| NES           | ENST00000368223 | chr1       | 156647406 | 156647407 | -219              |
| RNU4-2        | ENST00000365668 | chr12      | 120729923 | 120729924 | -219              |
| DEK           | ENST00000397239 | chr6       | 18265271  | 18265272  | -219              |
| S100A13       | ENST00000469931 | chr1       | 153607089 | 153607090 | -218              |
| TTC33         | ENST00000337702 | chr5       | 40756293  | 40756294  | -218              |
| SLFN13        | ENST00000285013 | chr17      | 33776071  | 33776072  | -217              |
| TRIM56        | ENST00000306085 | chr7       | 100728502 | 100728503 | -217              |

**Supplemental Table 2: Genes with significant occupancy of E2F8 at the promoter regions (-5kb to+2kb)**

| Gene Symbol  | Ensembl ID      | Chromosome | Start     | End       | distance from TSS |
|--------------|-----------------|------------|-----------|-----------|-------------------|
| TRIM44       | ENST00000299413 | chr11      | 35684136  | 35684137  | -216              |
| RTTN         | ENST00000255674 | chr18      | 67873395  | 67873396  | -216              |
| CCDC174      | ENST00000303688 | chr3       | 14693054  | 14693055  | -216              |
| DLAT         | ENST00000533297 | chr11      | 111895916 | 111895917 | -215              |
| PCNP         | ENST00000265260 | chr3       | 101292723 | 101292724 | -215              |
| DCTPP1       | ENST00000568434 | chr16      | 30440822  | 30440823  | -214              |
| CBX1         | ENST00000444685 | chr17      | 46178156  | 46178157  | -214              |
| EVI5L        | ENST00000270530 | chr19      | 7894905   | 7894906   | -213              |
| PWWP2A       | ENST00000456329 | chr5       | 159546641 | 159546642 | -213              |
| HIST1H4E     | ENST00000360441 | chr6       | 26204644  | 26204645  | -213              |
| BAZ1B        | ENST00000404251 | chr7       | 72936818  | 72936819  | -212              |
| RP11-312B8.1 | ENST00000442889 | chr1       | 6845112   | 6845113   | -211              |
| IRF2BP2      | ENST00000491430 | chr1       | 234744049 | 234744050 | -211              |
| PCGF2        | ENST00000580830 | chr17      | 36906279  | 36906280  | -211              |
| RPL19        | ENST00000225430 | chr17      | 37356324  | 37356325  | -211              |
| GTPBP3       | ENST00000599429 | chr19      | 17448114  | 17448115  | -211              |
| GORASP2      | ENST00000444801 | chr2       | 171785495 | 171785496 | -211              |
| RPIA         | ENST00000283646 | chr2       | 88990951  | 88990952  | -210              |
| TERF1        | ENST00000276602 | chr8       | 73920888  | 73920889  | -210              |
| NFIB         | ENST00000397579 | chr9       | 14314789  | 14314790  | -210              |
| MDM4         | ENST00000367182 | chr1       | 204485303 | 204485304 | -207              |
| NABP2        | ENST00000267023 | chr12      | 56617901  | 56617902  | -207              |
| PIGL         | ENST00000581006 | chr17      | 16120316  | 16120317  | -206              |
| TBP          | ENST00000421512 | chr6       | 170863183 | 170863184 | -206              |
| FAM220A      | ENST00000533877 | chr7       | 6388816   | 6388817   | -206              |
| BIRC3        | ENST00000526421 | chr11      | 102188009 | 102188010 | -205              |
| NQO2         | ENST00000380472 | chr6       | 2988674   | 2988675   | -205              |
| UCP2         | ENST00000543714 | chr11      | 73694090  | 73694091  | -204              |
| DCTN2        | ENST00000552390 | chr12      | 57929124  | 57929125  | -204              |
| FAM82A2      | ENST00000560905 | chr15      | 41047736  | 41047737  | -204              |
| COPS4        | ENST00000264389 | chr4       | 83956038  | 83956039  | -204              |
| SRSF6        | ENST00000483871 | chr20      | 42086364  | 42086365  | -203              |
| COL12A1      | ENST00000322507 | chr6       | 75915968  | 75915969  | -203              |
| ILF3         | ENST00000318511 | chr19      | 10764734  | 10764735  | -202              |
| CENPI        | ENST00000218507 | chrX       | 100352975 | 100352976 | -202              |
| CMPK1        | ENST00000371873 | chr1       | 47799267  | 47799268  | -201              |
| C20orf111    | ENST00000372970 | chr20      | 42838915  | 42838916  | -201              |
| TAF1         | ENST00000373790 | chrX       | 70585912  | 70585913  | -201              |
| U1           | ENST00000363009 | chr1       | 147735550 | 147735551 | -200              |
| SMC3         | ENST00000361804 | chr10      | 112327248 | 112327249 | -200              |



**Supplemental Table 2: Genes with significant occupancy of E2F8 at the promoter regions (-5kb to+2kb)**

| Gene Symbol   | Ensembl ID      | Chromosome | Start     | End       | distance from TSS |
|---------------|-----------------|------------|-----------|-----------|-------------------|
| TMEM127       | ENST00000435268 | chr2       | 96926531  | 96926532  | -200              |
| ATF2          | ENST00000437522 | chr2       | 176033308 | 176033309 | -200              |
| LETM2         | ENST00000527334 | chr8       | 38243524  | 38243525  | -200              |
| CLCF1         | ENST00000533438 | chr11      | 67141845  | 67141846  | -199              |
| PDCD7         | ENST00000204549 | chr15      | 65426369  | 65426370  | -197              |
| AC093901.1    | ENST00000414886 | chr2       | 118944156 | 118944157 | -196              |
| KPNA1         | ENST00000465882 | chr3       | 122233985 | 122233986 | -195              |
| MALSU1        | ENST00000466681 | chr7       | 23338623  | 23338624  | -195              |
| FAM73B        | ENST00000474534 | chr9       | 131798704 | 131798705 | -195              |
| PEX16         | ENST00000528674 | chr11      | 45939822  | 45939823  | -193              |
| ANO10         | ENST00000413397 | chr3       | 43733276  | 43733277  | -192              |
| SLC2A8        | ENST00000373371 | chr9       | 130159228 | 130159229 | -192              |
| RNF181        | ENST00000441634 | chr2       | 85822656  | 85822657  | -191              |
| DCAF6         | ENST00000450548 | chr1       | 167904830 | 167904831 | -190              |
| GRB7          | ENST00000445327 | chr17      | 37894833  | 37894834  | -190              |
| SEC1P         | ENST00000474419 | chr19      | 49141137  | 49141138  | -190              |
| NR1D2         | ENST00000312521 | chr3       | 23986560  | 23986561  | -190              |
| DHX15         | ENST00000336812 | chr4       | 24586361  | 24586362  | -190              |
| MTMR4         | ENST00000323456 | chr17      | 56595453  | 56595454  | -189              |
| BLOC1S3       | ENST00000433642 | chr19      | 45681813  | 45681814  | -189              |
| CEP250        | ENST00000446710 | chr20      | 34042795  | 34042796  | -189              |
| RP11-699L21.1 | ENST00000397645 | chr3       | 193721635 | 193721636 | -189              |
| ARL15         | ENST00000502271 | chr5       | 53606599  | 53606600  | -189              |
| PHRF1         | ENST00000264555 | chr11      | 576297    | 576298    | -188              |
| MLEC          | ENST00000228506 | chr12      | 121124483 | 121124484 | -188              |
| CCNA2         | ENST00000274026 | chr4       | 122745273 | 122745274 | -188              |
| SNX8          | ENST00000447136 | chr7       | 2394139   | 2394140   | -188              |
| VCIPI1        | ENST00000310421 | chr8       | 67579638  | 67579639  | -188              |
| RP11-500G10.1 | ENST00000456581 | chr10      | 131909266 | 131909267 | -187              |
| ARL11         | ENST00000282026 | chr13      | 50202247  | 50202248  | -187              |
| GTF2A1        | ENST00000556268 | chr14      | 81687906  | 81687907  | -187              |
| ATP6V1A       | ENST00000273398 | chr3       | 113465678 | 113465679 | -187              |
| PPP1R3F       | ENST00000438316 | chrX       | 49126118  | 49126119  | -187              |
| UBE2T         | ENST00000367274 | chr1       | 202311292 | 202311293 | -186              |
| ARRB1         | ENST00000393505 | chr11      | 75063057  | 75063058  | -186              |
| NDUFB6        | ENST00000379847 | chr9       | 32573344  | 32573345  | -186              |
| RNF135        | ENST00000443677 | chr17      | 29297816  | 29297817  | -185              |
| CHCHD2        | ENST00000395422 | chr7       | 56174452  | 56174453  | -185              |
| ST7           | ENST00000393446 | chr7       | 116593106 | 116593107 | -185              |
| LAS1L         | ENST00000484069 | chrX       | 64754838  | 64754839  | -185              |

**Supplemental Table 2: Genes with significant occupancy of E2F8 at the promoter regions (-5kb to+2kb)**

| Gene Symbol   | Ensembl ID      | Chromosome | Start     | End       | distance from TSS |
|---------------|-----------------|------------|-----------|-----------|-------------------|
| POLE4         | ENST00000483063 | chr2       | 75185435  | 75185436  | -183              |
| ARF4          | ENST00000463880 | chr3       | 57583416  | 57583417  | -183              |
| SMG7          | ENST00000440812 | chr1       | 183441168 | 183441169 | -182              |
| COX8A         | ENST00000314133 | chr11      | 63741896  | 63741897  | -182              |
| ZNF823        | ENST00000440527 | chr19      | 11850002  | 11850003  | -180              |
| PSENN         | ENST00000587708 | chr19      | 36235834  | 36235835  | -180              |
| METTL2B       | ENST00000462662 | chr7       | 128095713 | 128095714 | -180              |
| GCA           | ENST00000437150 | chr2       | 163200418 | 163200419 | -179              |
| BRIX1         | ENST00000336767 | chr5       | 34915301  | 34915302  | -179              |
| HIVEP1        | ENST00000491710 | chr6       | 12008816  | 12008817  | -178              |
| SLBP          | ENST00000489418 | chr4       | 1714457   | 1714458   | -177              |
| ZNF131        | ENST00000503599 | chr5       | 43065100  | 43065101  | -177              |
| RP4-756H11.3  | ENST00000448096 | chr7       | 66119347  | 66119348  | -177              |
| ZC3HAV1       | ENST00000471652 | chr7       | 138794640 | 138794641 | -177              |
| AC008781.7    | ENST00000422040 | chr5       | 140997804 | 140997805 | -176              |
| BRPF1         | ENST00000433861 | chr3       | 9773237   | 9773238   | -175              |
| PDE12         | ENST00000487257 | chr3       | 57541827  | 57541828  | -175              |
| POLA1         | ENST00000379068 | chrX       | 24711860  | 24711861  | -175              |
| RBBP5         | ENST00000264515 | chr1       | 205091315 | 205091316 | -174              |
| ZNHIT3        | ENST00000490126 | chr17      | 34842298  | 34842299  | -174              |
| RAB28         | ENST00000330852 | chr4       | 13486161  | 13486162  | -174              |
| AATF          | ENST00000225402 | chr17      | 35306001  | 35306002  | -173              |
| FAM161A       | ENST00000405894 | chr2       | 62081449  | 62081450  | -173              |
| HIST1H3G      | ENST00000305910 | chr6       | 26271783  | 26271784  | -173              |
| SRSF10        | ENST00000453840 | chr1       | 24307123  | 24307124  | -172              |
| ZC3H10        | ENST00000257940 | chr12      | 56511770  | 56511771  | -172              |
| MAP3K2        | ENST00000409947 | chr2       | 128146211 | 128146212 | -172              |
| GMPR2         | ENST00000560517 | chr14      | 24706009  | 24706010  | -171              |
| NLRC5         | ENST00000399221 | chr16      | 57091805  | 57091806  | -171              |
| ZBTB45        | ENST00000600990 | chr19      | 59031287  | 59031288  | -171              |
| FKBPL         | ENST00000375156 | chr6       | 32098237  | 32098238  | -171              |
| AC093391.2    | ENST00000419808 | chr2       | 136742575 | 136742576 | -170              |
| BIN3          | ENST00000522268 | chr8       | 22526829  | 22526830  | -170              |
| WASF2         | ENST00000430629 | chr1       | 27816836  | 27816837  | -169              |
| HNRNPA3       | ENST00000392524 | chr2       | 178077121 | 178077122 | -169              |
| RP11-573D15.8 | ENST00000354642 | chr3       | 186464086 | 186464087 | -169              |
| HIST1H2AB     | ENST00000259791 | chr6       | 26033963  | 26033964  | -169              |
| ZNF782        | ENST00000481138 | chr9       | 99616936  | 99616937  | -168              |
| OIP5-AS1      | ENST00000558945 | chr15      | 41576020  | 41576021  | -167              |
| GMCL1         | ENST00000282570 | chr2       | 70056606  | 70056607  | -167              |

**Supplemental Table 2: Genes with significant occupancy of E2F8 at the promoter regions (-5kb to+2kb)**

| Gene Symbol   | Ensembl ID      | Chromosome | Start     | End       | distance from TSS |
|---------------|-----------------|------------|-----------|-----------|-------------------|
| CDC23         | ENST00000394886 | chr5       | 137549197 | 137549198 | -167              |
| MAD2L1BP      | ENST00000372171 | chr6       | 43603388  | 43603389  | -167              |
| DDX50         | ENST00000373585 | chr10      | 70660867  | 70660868  | -166              |
| TAB1          | ENST00000216160 | chr22      | 39795579  | 39795580  | -166              |
| RPL32         | ENST00000429711 | chr3       | 12883251  | 12883252  | -166              |
| ZNF860        | ENST00000489408 | chr3       | 32023096  | 32023097  | -166              |
| PPIA          | ENST00000468812 | chr7       | 44836112  | 44836113  | -166              |
| NOL6          | ENST00000353159 | chr9       | 33474092  | 33474093  | -166              |
| CA5BP1        | ENST00000380336 | chrX       | 15692888  | 15692889  | -166              |
| GLO1          | ENST00000373365 | chr6       | 38671080  | 38671081  | -165              |
| BPGM          | ENST00000344924 | chr7       | 134331394 | 134331395 | -165              |
| SLC39A1       | ENST00000356205 | chr1       | 153936210 | 153936211 | -164              |
| LRIG1         | ENST00000498287 | chr3       | 66551849  | 66551850  | -164              |
| TCAM1P        | ENST00000463377 | chr17      | 61926488  | 61926489  | -163              |
| AC009005.2    | ENST00000589457 | chr19      | 571906    | 571907    | -163              |
| PRPF40A       | ENST00000486100 | chr2       | 153574672 | 153574673 | -163              |
| BAG6          | ENST00000211379 | chr6       | 31620643  | 31620644  | -163              |
| TOM1L2        | ENST00000579586 | chr17      | 17875896  | 17875897  | -162              |
| TOP2A         | ENST00000423485 | chr17      | 38574362  | 38574363  | -162              |
| GLI2          | ENST00000438299 | chr2       | 121549696 | 121549697 | -162              |
| FICD          | ENST00000552695 | chr12      | 108908800 | 108908801 | -161              |
| ATF4          | ENST00000396680 | chr22      | 39916408  | 39916409  | -160              |
| TMEM41B       | ENST00000528080 | chr11      | 9336484   | 9336485   | -159              |
| MUTYH         | ENST00000372115 | chr1       | 45806298  | 45806299  | -158              |
| RP11-222A11.1 | ENST00000593568 | chr10      | 67330474  | 67330475  | -158              |
| LINC00471     | ENST00000313064 | chr2       | 232379204 | 232379205 | -156              |
| AK2           | ENST00000354858 | chr1       | 33502746  | 33502747  | -155              |
| CREM          | ENST00000469517 | chr10      | 35485171  | 35485172  | -155              |
| PDCD4         | ENST00000280154 | chr10      | 112631409 | 112631410 | -155              |
| NEAT1         | ENST00000499732 | chr11      | 65190090  | 65190091  | -154              |
| GPRC5B        | ENST00000569479 | chr16      | 19897641  | 19897642  | -154              |
| SAMD13        | ENST00000370671 | chr1       | 84765087  | 84765088  | -153              |
| CENPA         | ENST00000335756 | chr2       | 27008712  | 27008713  | -152              |
| C20orf118     | ENST00000436941 | chr20      | 35515705  | 35515706  | -152              |
| DAXX          | ENST00000490173 | chr6       | 33288387  | 33288388  | -152              |
| ARHGEF19      | ENST00000449495 | chr1       | 16533187  | 16533188  | -151              |
| TMEM194A      | ENST00000300128 | chr12      | 57472701  | 57472702  | -151              |
| METTL2A       | ENST00000311506 | chr17      | 60501076  | 60501077  | -151              |
| HIST1H3B      | ENST00000244661 | chr6       | 26032437  | 26032438  | -151              |
| RP11-867G23.2 | ENST00000533287 | chr11      | 66035748  | 66035749  | -150              |

**Supplemental Table 2: Genes with significant occupancy of E2F8 at the promoter regions (-5kb to+2kb)**

| <b>Gene Symbol</b> | <b>Ensembl ID</b> | <b>Chromosome</b> | <b>Start</b> | <b>End</b> | <b>distance from TSS</b> |
|--------------------|-------------------|-------------------|--------------|------------|--------------------------|
| XRCC5              | ENST00000392132   | chr2              | 216973869    | 216973870  | -150                     |
| TUBA1B             | ENST00000549870   | chr12             | 49524043     | 49524044   | -149                     |
| TRA2B              | ENST00000453386   | chr3              | 185656071    | 185656072  | -149                     |
| GOLPH3             | ENST00000265070   | chr5              | 32174603     | 32174604   | -149                     |
| TICRR              | ENST00000268138   | chr15             | 90118564     | 90118565   | -148                     |
| RBL1               | ENST00000373664   | chr20             | 35724544     | 35724545   | -148                     |
| SCML1              | ENST00000380045   | chrX              | 17755439     | 17755440   | -148                     |
| MICU1              | ENST00000398761   | chr10             | 74386044     | 74386045   | -147                     |
| MED17              | ENST00000251871   | chr11             | 93517245     | 93517246   | -147                     |
| NPC2               | ENST00000556009   | chr14             | 74961025     | 74961026   | -147                     |
| FHOD1              | ENST00000258201   | chr16             | 67281706     | 67281707   | -147                     |
| HIST1H2BD          | ENST00000377777   | chr6              | 26158202     | 26158203   | -146                     |
| ATAD2              | ENST00000287394   | chr8              | 124408849    | 124408850  | -146                     |
| BMF                | ENST00000558774   | chr15             | 40401234     | 40401235   | -143                     |
| SUCLG1             | ENST00000393868   | chr2              | 84686744     | 84686745   | -142                     |
| DDX23              | ENST00000552555   | chr12             | 49246763     | 49246764   | -140                     |
| CD320              | ENST00000596246   | chr19             | 8373378      | 8373379    | -140                     |
| PDXP               | ENST00000215904   | chr22             | 38054593     | 38054594   | -140                     |
| YIPF1              | ENST00000412288   | chr1              | 54355644     | 54355645   | -139                     |
| TRMT112            | ENST00000308774   | chr11             | 64085167     | 64085168   | -139                     |
| TMPO-AS1           | ENST00000548760   | chr12             | 98910337     | 98910338   | -139                     |
| ATP5G1             | ENST00000355938   | chr17             | 46969988     | 46969989   | -138                     |
| NR1H2              | ENST00000595730   | chr19             | 50879575     | 50879576   | -138                     |
| PANK2              | ENST00000336066   | chr20             | 3869897      | 3869898    | -138                     |
| AHCTF1             | ENST00000478568   | chr1              | 247095415    | 247095416  | -137                     |
| MCM10              | ENST00000378714   | chr10             | 13203416     | 13203417   | -137                     |
| TAF6L              | ENST00000294168   | chr11             | 62538637     | 62538638   | -137                     |
| ZNF181             | ENST00000599244   | chr19             | 35224922     | 35224923   | -137                     |
| GGCT               | ENST00000275428   | chr7              | 30544595     | 30544596   | -137                     |
| USP24              | ENST00000484447   | chr1              | 55541306     | 55541307   | -136                     |
| PER1               | ENST00000581395   | chr17             | 8059958      | 8059959    | -136                     |
| LUC7L2             | ENST00000545899   | chr7              | 139044490    | 139044491  | -136                     |
| POLQ               | ENST00000264233   | chr3              | 121264986    | 121264987  | -135                     |
| KCNK1              | ENST00000366621   | chr1              | 233749615    | 233749616  | -134                     |
| LINC00493          | ENST00000411646   | chr20             | 18547929     | 18547930   | -134                     |
| DDX39B             | ENST00000428098   | chr6              | 31509927     | 31509928   | -134                     |
| MMACHC             | ENST00000474382   | chr1              | 45974671     | 45974672   | -133                     |
| NUCB1              | ENST00000407032   | chr19             | 49403443     | 49403444   | -133                     |
| AMOTL2             | ENST00000506107   | chr3              | 134093891    | 134093892  | -133                     |
| EIF3F              | ENST00000309828   | chr11             | 8008735      | 8008736    | -131                     |

**Supplemental Table 2: Genes with significant occupancy of E2F8 at the promoter regions (-5kb to+2kb)**

| Gene Symbol   | Ensembl ID      | Chromosome | Start     | End       | distance from TSS |
|---------------|-----------------|------------|-----------|-----------|-------------------|
| RP11-424C20.2 | ENST00000540175 | chr12      | 20704392  | 20704393  | -131              |
| ZNF219        | ENST00000555697 | chr14      | 21571867  | 21571868  | -131              |
| RANBP3        | ENST00000587479 | chr19      | 5978282   | 5978283   | -131              |
| HNRNPD        | ENST00000509263 | chr4       | 83294431  | 83294432  | -130              |
| TCF19         | ENST00000376257 | chr6       | 31126188  | 31126189  | -130              |
| COX7B         | ENST00000481445 | chrX       | 77154804  | 77154805  | -130              |
| PPP1R3E       | ENST00000561178 | chr14      | 23770276  | 23770277  | -129              |
| EIF2AK3       | ENST00000303236 | chr2       | 88927221  | 88927222  | -129              |
| BTG1          | ENST00000256015 | chr12      | 92539799  | 92539800  | -128              |
| COPS3         | ENST00000268717 | chr17      | 17184733  | 17184734  | -128              |
| CCT7          | ENST00000540468 | chr2       | 73461235  | 73461236  | -128              |
| LTN1          | ENST00000361371 | chr21      | 30365403  | 30365404  | -128              |
| KRR1          | ENST00000550898 | chr12      | 75905541  | 75905542  | -127              |
| UFM1          | ENST00000494372 | chr13      | 38923858  | 38923859  | -127              |
| EIF6          | ENST00000374450 | chr20      | 33872913  | 33872914  | -127              |
| KIAA0907      | ENST00000491599 | chr1       | 155904315 | 155904316 | -126              |
| HNRNPC        | ENST00000336053 | chr14      | 21737777  | 21737778  | -126              |
| TMEM102       | ENST00000323206 | chr17      | 7338635   | 7338636   | -126              |
| ANAPC5        | ENST00000261819 | chr12      | 121790388 | 121790389 | -125              |
| POLRMT        | ENST00000215591 | chr19      | 633691    | 633692    | -125              |
| PPP1R37       | ENST00000421905 | chr19      | 45596092  | 45596093  | -125              |
| HIST1H3F      | ENST00000446824 | chr6       | 26250958  | 26250959  | -125              |
| FBXO9         | ENST00000370939 | chr6       | 52929670  | 52929671  | -125              |
| RP11-316M1.11 | ENST00000439374 | chr1       | 151042923 | 151042924 | -124              |
| ACO2          | ENST00000216254 | chr22      | 41865004  | 41865005  | -124              |
| RP11-155G15.2 | ENST00000504578 | chr5       | 96519178  | 96519179  | -124              |
| ANP32E        | ENST00000314136 | chr1       | 150208625 | 150208626 | -123              |
| MRPL11        | ENST00000430466 | chr11      | 66206440  | 66206441  | -123              |
| DERL3         | ENST00000290730 | chr22      | 24181436  | 24181437  | -123              |
| PES1          | ENST00000354694 | chr22      | 30988048  | 30988049  | -123              |
| SOAT1         | ENST00000426956 | chr1       | 179263332 | 179263333 | -122              |
| TSG101        | ENST00000536719 | chr11      | 18548618  | 18548619  | -122              |
| KRT7          | ENST00000552322 | chr12      | 52638039  | 52638040  | -122              |
| CCNB1IP1      | ENST00000398160 | chr14      | 20801289  | 20801290  | -122              |
| RANGRF        | ENST00000226105 | chr17      | 8191692   | 8191693   | -122              |
| KLHDC3        | ENST00000326974 | chr6       | 42981828  | 42981829  | -122              |
| CTD-2319I12.4 | ENST00000586143 | chr17      | 58213124  | 58213125  | -121              |
| AP000351.10   | ENST00000439866 | chr22      | 24372995  | 24372996  | -121              |
| YBX1          | ENST00000321358 | chr1       | 43147977  | 43147978  | -120              |
| MED19         | ENST00000534677 | chr11      | 57479811  | 57479812  | -120              |

**Supplemental Table 2: Genes with significant occupancy of E2F8 at the promoter regions (-5kb to+2kb)**

| Gene Symbol   | Ensembl ID      | Chromosome | Start     | End       | distance from TSS |
|---------------|-----------------|------------|-----------|-----------|-------------------|
| HIST1H4A      | ENST00000359907 | chr6       | 26021786  | 26021787  | -120              |
| RP11-255B23.3 | ENST00000500112 | chr8       | 128231451 | 128231452 | -120              |
| SF3B4         | ENST00000457312 | chr1       | 149899600 | 149899601 | -119              |
| CIT           | ENST00000392521 | chr12      | 120315212 | 120315213 | -119              |
| RP11-407N17.4 | ENST00000556537 | chr14      | 39645201  | 39645202  | -119              |
| SH2B1         | ENST00000359285 | chr16      | 28875006  | 28875007  | -119              |
| MKRN2-AS1     | ENST00000564146 | chr3       | 12587138  | 12587139  | -119              |
| RPS3          | ENST00000531188 | chr11      | 75110411  | 75110412  | -118              |
| TRABD2A       | ENST00000474298 | chr2       | 85134248  | 85134249  | -118              |
| EEF1B2        | ENST00000415904 | chr2       | 207024532 | 207024533 | -118              |
| CNPY3         | ENST00000372836 | chr6       | 42896819  | 42896820  | -118              |
| TTI2          | ENST00000523305 | chr8       | 33370753  | 33370754  | -118              |
| INTS5         | ENST00000330574 | chr11      | 62420889  | 62420890  | -117              |
| OPA3          | ENST00000323060 | chr19      | 46088215  | 46088216  | -117              |
| UBXN4         | ENST00000272638 | chr2       | 136499071 | 136499072 | -117              |
| SFPQ          | ENST00000357214 | chr1       | 35658863  | 35658864  | -116              |
| ATG13         | ENST00000580238 | chr11      | 46638960  | 46638961  | -116              |
| FAM32A        | ENST00000589852 | chr19      | 16296074  | 16296075  | -116              |
| HIST1H2AG     | ENST00000359193 | chr6       | 27100715  | 27100716  | -116              |
| KTI12         | ENST00000371614 | chr1       | 52499601  | 52499602  | -115              |
| GBF1          | ENST00000369983 | chr10      | 104005173 | 104005174 | -115              |
| SNRPG         | ENST00000438261 | chr2       | 70520693  | 70520694  | -115              |
| CDCA7         | ENST00000347703 | chr2       | 174219432 | 174219433 | -115              |
| COPS7B        | ENST00000410024 | chr2       | 232646265 | 232646266 | -115              |
| PNISR         | ENST00000438806 | chr6       | 99873320  | 99873321  | -115              |
| NUDT2         | ENST00000379158 | chr9       | 34329388  | 34329389  | -115              |
| KLHL20        | ENST00000493170 | chr1       | 173684591 | 173684592 | -114              |
| HIST3H2A      | ENST00000366695 | chr1       | 228645672 | 228645673 | -114              |
| TUBB          | ENST00000327892 | chr6       | 30687864  | 30687865  | -113              |
| CNTLN         | ENST00000380647 | chr9       | 17134866  | 17134867  | -113              |
| SNAP23        | ENST00000564153 | chr15      | 42787719  | 42787720  | -112              |
| DDX39A        | ENST00000590260 | chr19      | 14530301  | 14530302  | -111              |
| IGFLR1        | ENST00000587101 | chr19      | 36231606  | 36231607  | -111              |
| PRMT5-AS1     | ENST00000424245 | chr14      | 23388554  | 23388555  | -110              |
| RP11-806L2.5  | ENST00000584679 | chr18      | 657367    | 657368    | -110              |
| TOMM40        | ENST00000589253 | chr19      | 45393715  | 45393716  | -110              |
| TARS2         | ENST00000438568 | chr1       | 150459777 | 150459778 | -109              |
| PTGS2         | ENST00000367468 | chr1       | 186649666 | 186649667 | -109              |
| CREBZF        | ENST00000490820 | chr11      | 85376253  | 85376254  | -109              |
| TPRA1         | ENST00000355552 | chr3       | 127309719 | 127309720 | -109              |

**Supplemental Table 2: Genes with significant occupancy of E2F8 at the promoter regions (-5kb to+2kb)**

| Gene Symbol  | Ensembl ID      | Chromosome | Start     | End       | distance from TSS |
|--------------|-----------------|------------|-----------|-----------|-------------------|
| PIN4         | ENST00000423432 | chrX       | 71401416  | 71401417  | -109              |
| HIST2H2AB    | ENST00000331128 | chr1       | 149859572 | 149859573 | -108              |
| VPS72        | ENST00000463470 | chr1       | 151167903 | 151167904 | -108              |
| DCTPP1       | ENST00000319285 | chr16      | 30441502  | 30441503  | -108              |
| CCT5         | ENST00000515390 | chr5       | 10250219  | 10250220  | -108              |
| PHF11        | ENST00000482487 | chr13      | 50069638  | 50069639  | -107              |
| SPC24        | ENST00000592540 | chr19      | 11266589  | 11266590  | -107              |
| C19orf53     | ENST00000221576 | chr19      | 13885185  | 13885186  | -107              |
| TMEM91       | ENST00000392002 | chr19      | 41882021  | 41882022  | -107              |
| RTN4         | ENST00000394611 | chr2       | 55277839  | 55277840  | -107              |
| TAX1BP1      | ENST00000265393 | chr7       | 27779606  | 27779607  | -107              |
| RP11-280G9.1 | ENST00000505627 | chr8       | 62678633  | 62678634  | -107              |
| RPS26        | ENST00000548590 | chr12      | 56435817  | 56435818  | -106              |
| HMGB1        | ENST00000341423 | chr13      | 31040206  | 31040207  | -106              |
| MFAP1        | ENST00000267812 | chr15      | 44117104  | 44117105  | -106              |
| RFWD3        | ENST00000361070 | chr16      | 74700883  | 74700884  | -106              |
| ADAT1        | ENST00000307921 | chr16      | 75657302  | 75657303  | -106              |
| CCDC115      | ENST00000259229 | chr2       | 131100026 | 131100027 | -106              |
| HIST1H4B     | ENST00000377364 | chr6       | 26027584  | 26027585  | -106              |
| FANCG        | ENST00000378643 | chr9       | 35080117  | 35080118  | -106              |
| WLS          | ENST00000527864 | chr1       | 68697611  | 68697612  | -105              |
| RHOV         | ENST00000220507 | chr15      | 41166590  | 41166591  | -105              |
| RBM14        | ENST00000310137 | chr11      | 66383949  | 66383950  | -103              |
| KRT7         | ENST00000552183 | chr12      | 52635208  | 52635209  | -103              |
| OSGEP        | ENST00000553640 | chr14      | 20923072  | 20923073  | -103              |
| C19orf45     | ENST00000601292 | chr19      | 7571577   | 7571578   | -103              |
| SLC25A25     | ENST00000472769 | chr9       | 130860712 | 130860713 | -103              |
| RIT1         | ENST00000368323 | chr1       | 155881295 | 155881296 | -102              |
| HNRNPF       | ENST00000357065 | chr10      | 43903367  | 43903368  | -102              |
| CRADD        | ENST00000332896 | chr12      | 94071048  | 94071049  | -102              |
| HAUS4        | ENST00000555040 | chr14      | 23426470  | 23426471  | -102              |
| TOP3A        | ENST00000582981 | chr17      | 18218421  | 18218422  | -102              |
| C19orf25     | ENST00000592605 | chr19      | 1479318   | 1479319   | -102              |
| BZW1         | ENST00000464483 | chr2       | 201676530 | 201676531 | -102              |
| ZNF335       | ENST00000426788 | chr20      | 44600933  | 44600934  | -102              |
| HECTD3       | ENST00000372172 | chr1       | 45477100  | 45477101  | -101              |
| CRYM-AS1     | ENST00000338573 | chr16      | 21312068  | 21312069  | -101              |
| PSMB3        | ENST00000225426 | chr17      | 36908887  | 36908888  | -101              |
| GTF2H1       | ENST00000531757 | chr11      | 18343993  | 18343994  | -100              |
| ALG3         | ENST00000397676 | chr3       | 183966857 | 183966858 | -100              |

**Supplemental Table 2: Genes with significant occupancy of E2F8 at the promoter regions (-5kb to+2kb)**

| Gene Symbol   | Ensembl ID      | Chromosome | Start     | End       | distance from TSS |
|---------------|-----------------|------------|-----------|-----------|-------------------|
| CXCL2         | ENST00000508487 | chr4       | 74965108  | 74965109  | -100              |
| MB21D1        | ENST00000370315 | chr6       | 74162097  | 74162098  | -100              |
| UBXN11        | ENST00000374221 | chr1       | 26633233  | 26633234  | -99               |
| RP11-111M22.3 | ENST00000571090 | chr11      | 76155821  | 76155822  | -99               |
| RAD9B         | ENST00000433301 | chr12      | 110939360 | 110939361 | -99               |
| ONECUT1       | ENST00000567155 | chr15      | 53081690  | 53081691  | -99               |
| NGRN          | ENST00000331497 | chr15      | 90808791  | 90808792  | -99               |
| P4HB          | ENST00000331483 | chr17      | 79818667  | 79818668  | -99               |
| ZNF581        | ENST00000270451 | chr19      | 56154813  | 56154814  | -99               |
| LETMD1        | ENST00000547318 | chr12      | 51441985  | 51441986  | -98               |
| AHSA1         | ENST00000555133 | chr14      | 77924114  | 77924115  | -98               |
| MON1B         | ENST00000569610 | chr16      | 77224633  | 77224634  | -98               |
| EIF3D         | ENST00000432675 | chr22      | 36925327  | 36925328  | -98               |
| UBE2D3        | ENST00000394803 | chr4       | 103749412 | 103749413 | -98               |
| VTI1A         | ENST00000489142 | chr10      | 114206894 | 114206895 | -97               |
| ALDH3A1       | ENST00000439102 | chr17      | 19649088  | 19649089  | -97               |
| PAFAH1B3      | ENST00000538771 | chr19      | 42807024  | 42807025  | -97               |
| MOCS3         | ENST00000244051 | chr20      | 49575265  | 49575266  | -97               |
| KIAA1211      | ENST00000264229 | chr4       | 57036263  | 57036264  | -97               |
| HNRNPA2B1     | ENST00000463181 | chr7       | 26240499  | 26240500  | -97               |
| PNP           | ENST00000554065 | chr14      | 20938588  | 20938589  | -96               |
| YARS          | ENST00000373477 | chr1       | 33283847  | 33283848  | -95               |
| RPS11         | ENST00000600027 | chr19      | 49999526  | 49999527  | -95               |
| HIST1H4I      | ENST00000354348 | chr6       | 27106980  | 27106981  | -95               |
| NOLC1         | ENST00000405356 | chr10      | 103911838 | 103911839 | -94               |
| HAPLN3        | ENST00000359595 | chr15      | 89438948  | 89438949  | -93               |
| SYTL1         | ENST00000490170 | chr1       | 27673942  | 27673943  | -92               |
| METTL3        | ENST00000298717 | chr14      | 21979607  | 21979608  | -92               |
| PPCDC         | ENST00000342932 | chr15      | 75315803  | 75315804  | -92               |
| MEF2A         | ENST00000338042 | chr15      | 100106040 | 100106041 | -92               |
| PLEKHH3       | ENST00000412503 | chr17      | 40829138  | 40829139  | -92               |
| TTLL3         | ENST00000419081 | chr3       | 9851291   | 9851292   | -92               |
| RFC1          | ENST00000381897 | chr4       | 39368085  | 39368086  | -92               |
| COX6A1        | ENST00000229379 | chr12      | 120875801 | 120875802 | -91               |
| MCM6          | ENST00000264156 | chr2       | 136634085 | 136634086 | -91               |
| HOXB6         | ENST00000490419 | chr17      | 46681582  | 46681583  | -90               |
| ZFYVE19       | ENST00000560078 | chr15      | 41100229  | 41100230  | -89               |
| RP11-168G16.1 | ENST00000340644 | chr15      | 100890525 | 100890526 | -89               |
| AC002310.7    | ENST00000486926 | chr16      | 30583481  | 30583482  | -89               |
| MIR1181       | ENST00000408639 | chr19      | 10514301  | 10514302  | -89               |



**Supplemental Table 2: Genes with significant occupancy of E2F8 at the promoter regions (-5kb to+2kb)**

| Gene Symbol  | Ensembl ID      | Chromosome | Start     | End       | distance from TSS |
|--------------|-----------------|------------|-----------|-----------|-------------------|
| CDC25A       | ENST00000437972 | chr3       | 48229979  | 48229980  | -89               |
| HIST1H2AM    | ENST00000359611 | chr6       | 27861050  | 27861051  | -89               |
| TMPO         | ENST00000556029 | chr12      | 98909201  | 98909202  | -88               |
| C12orf65     | ENST00000425637 | chr12      | 123717895 | 123717896 | -88               |
| TAF6         | ENST00000487288 | chr7       | 99716685  | 99716686  | -88               |
| SRRM1        | ENST00000323848 | chr1       | 24969415  | 24969416  | -87               |
| TRIM45       | ENST00000485032 | chr1       | 117664499 | 117664500 | -87               |
| ERCC5        | ENST00000535557 | chr13      | 103498086 | 103498087 | -87               |
| BRIP1        | ENST00000577913 | chr17      | 59940790  | 59940791  | -87               |
| GUCD1        | ENST00000435822 | chr22      | 24951369  | 24951370  | -87               |
| MORF4L2-AS1  | ENST00000435306 | chrX       | 102942124 | 102942125 | -87               |
| CDT1         | ENST00000562747 | chr16      | 88870932  | 88870933  | -86               |
| NUP155       | ENST00000231498 | chr5       | 37371367  | 37371368  | -86               |
| C6orf89      | ENST00000480824 | chr6       | 36853543  | 36853544  | -86               |
| CENPL        | ENST00000479159 | chr1       | 173793941 | 173793942 | -85               |
| TMEM138      | ENST00000423772 | chr11      | 61130055  | 61130056  | -85               |
| ZNF384       | ENST00000538829 | chr12      | 6798145   | 6798146   | -85               |
| SUPT5H       | ENST00000599907 | chr19      | 39948906  | 39948907  | -85               |
| CCNT2        | ENST00000419781 | chr2       | 135675719 | 135675720 | -85               |
| HIST1H2AH    | ENST00000377459 | chr6       | 27114775  | 27114776  | -85               |
| NONO         | ENST00000276079 | chrX       | 70503347  | 70503348  | -85               |
| GLA          | ENST00000218516 | chrX       | 100662996 | 100662997 | -85               |
| IMP3         | ENST00000403490 | chr15      | 75932634  | 75932635  | -84               |
| COPS7A       | ENST00000442593 | chr12      | 6833096   | 6833097   | -83               |
| B3GNTL1      | ENST00000573629 | chr17      | 81006741  | 81006742  | -83               |
| CTB-55O6.12  | ENST00000588387 | chr19      | 14247907  | 14247908  | -83               |
| SPC25        | ENST00000282074 | chr2       | 169747036 | 169747037 | -83               |
| RP11-306I1.2 | ENST00000452618 | chr1       | 165567617 | 165567618 | -82               |
| CD44         | ENST00000263398 | chr11      | 35160334  | 35160335  | -82               |
| MED24        | ENST00000495586 | chr17      | 38183482  | 38183483  | -82               |
| ZNF226       | ENST00000590578 | chr19      | 44669143  | 44669144  | -82               |
| SMU1         | ENST00000536631 | chr9       | 33076745  | 33076746  | -82               |
| FAM178A      | ENST00000238961 | chr10      | 102672638 | 102672639 | -81               |
| CCDC61       | ENST00000595358 | chr19      | 46498643  | 46498644  | -81               |
| CTC-329D1.2  | ENST00000507521 | chr5       | 139781031 | 139781032 | -81               |
| HDAC6        | ENST00000423941 | chrX       | 48659702  | 48659703  | -81               |
| CCDC9        | ENST00000599398 | chr19      | 47760708  | 47760709  | -80               |
| INO80B       | ENST00000233331 | chr2       | 74682069  | 74682070  | -80               |
| TMEM230      | ENST00000202834 | chr20      | 5093827   | 5093828   | -80               |
| POLR3A       | ENST00000372371 | chr10      | 79789380  | 79789381  | -79               |

**Supplemental Table 2: Genes with significant occupancy of E2F8 at the promoter regions (-5kb to+2kb)**

| <b>Gene Symbol</b> | <b>Ensembl ID</b> | <b>Chromosome</b> | <b>Start</b> | <b>End</b> | <b>distance from TSS</b> |
|--------------------|-------------------|-------------------|--------------|------------|--------------------------|
| NCOA7              | ENST00000444128   | chr6              | 126240371    | 126240372  | -79                      |
| DHX40              | ENST00000251241   | chr17             | 57642807     | 57642808   | -78                      |
| MCFD2              | ENST00000444761   | chr2              | 47169070     | 47169071   | -78                      |
| TMUB2              | ENST00000446571   | chr17             | 42264260     | 42264261   | -77                      |
| ZSWIM3             | ENST00000255152   | chr20             | 44486178     | 44486179   | -77                      |
| HIST1H4D           | ENST00000340756   | chr6              | 26189379     | 26189380   | -77                      |
| UCHL5              | ENST00000367452   | chr1              | 193029311    | 193029312  | -76                      |
| RAB5B              | ENST00000553116   | chr12             | 56367620     | 56367621   | -76                      |
| AQR                | ENST00000156471   | chr15             | 35262114     | 35262115   | -76                      |
| KAT7               | ENST00000259021   | chr17             | 47865840     | 47865841   | -76                      |
| GRPEL2             | ENST00000329271   | chr5              | 148724916    | 148724917  | -76                      |
| USP1               | ENST00000339950   | chr1              | 62902250     | 62902251   | -75                      |
| RPS13              | ENST00000525634   | chr11             | 17099407     | 17099408   | -75                      |
| SGTB               | ENST00000506816   | chr5              | 65018935     | 65018936   | -75                      |
| RMND1              | ENST00000367303   | chr6              | 151773332    | 151773333  | -75                      |
| GANAB              | ENST00000534779   | chr11             | 62414176     | 62414177   | -74                      |
| CDK2               | ENST00000556276   | chr12             | 56360989     | 56360990   | -74                      |
| CNOT2              | ENST00000552231   | chr12             | 70636699     | 70636700   | -74                      |
| AC131097.3         | ENST00000430555   | chr2              | 242823439    | 242823440  | -74                      |
| ATF6B              | ENST00000375201   | chr6              | 32096102     | 32096103   | -74                      |
| DLEU1              | ENST00000490577   | chr13             | 50656233     | 50656234   | -73                      |
| SPOP               | ENST00000504102   | chr17             | 47755667     | 47755668   | -73                      |
| MRPS23             | ENST00000313608   | chr17             | 55927488     | 55927489   | -73                      |
| GRWD1              | ENST00000253237   | chr19             | 48948956     | 48948957   | -73                      |
| RRM2               | ENST00000459969   | chr2              | 10262765     | 10262766   | -73                      |
| NOP16              | ENST00000389158   | chr5              | 175816047    | 175816048  | -73                      |
| EEF1E1             | ENST00000379715   | chr6              | 8102882      | 8102883    | -73                      |
| GBA                | ENST00000427500   | chr1              | 155211136    | 155211137  | -72                      |
| HEATR6             | ENST00000184956   | chr17             | 58156362     | 58156363   | -72                      |
| ZNF263             | ENST00000572748   | chr16             | 3333413      | 3333414    | -71                      |
| ZNF430             | ENST00000261560   | chr19             | 21203354     | 21203355   | -71                      |
| RP11-535A19.2      | ENST00000531263   | chr11             | 75525910     | 75525911   | -70                      |
| USE1               | ENST00000445667   | chr19             | 17326084     | 17326085   | -70                      |
| U2                 | ENST00000411315   | chr3              | 73160072     | 73160073   | -70                      |
| IPO11              | ENST00000505902   | chr5              | 61708417     | 61708418   | -70                      |
| EBP                | ENST00000276096   | chrX              | 48380116     | 48380117   | -70                      |
| C1orf35            | ENST00000272139   | chr1              | 228291230    | 228291231  | -69                      |
| POLR2M             | ENST00000299638   | chr15             | 57998757     | 57998758   | -69                      |
| SNIP1              | ENST00000296215   | chr1              | 38019969     | 38019970   | -68                      |
| C12orf76           | ENST00000551185   | chr12             | 110486436    | 110486437  | -68                      |

**Supplemental Table 2: Genes with significant occupancy of E2F8 at the promoter regions (-5kb to+2kb)**

| Gene Symbol   | Ensembl ID      | Chromosome | Start     | End       | distance from TSS |
|---------------|-----------------|------------|-----------|-----------|-------------------|
| THG1L         | ENST00000521655 | chr5       | 157158359 | 157158360 | -68               |
| MDC1          | ENST00000425072 | chr6       | 30685290  | 30685291  | -68               |
| ZNF684        | ENST00000372699 | chr1       | 40997165  | 40997166  | -67               |
| C1orf123      | ENST00000483739 | chr1       | 53685657  | 53685658  | -67               |
| ARID4B        | ENST00000349213 | chr1       | 235491599 | 235491600 | -67               |
| GPR113        | ENST00000333478 | chr2       | 26569750  | 26569751  | -67               |
| WEE1          | ENST00000450114 | chr11      | 9595161   | 9595162   | -66               |
| C19orf38      | ENST00000592854 | chr19      | 10947184  | 10947185  | -66               |
| MCM5          | ENST00000216122 | chr22      | 35795989  | 35795990  | -66               |
| PTP4A1        | ENST00000370651 | chr6       | 64281850  | 64281851  | -66               |
| ULBP2         | ENST00000367351 | chr6       | 150263070 | 150263071 | -65               |
| POLR2K        | ENST00000353107 | chr8       | 101162746 | 101162747 | -65               |
| E2F2          | ENST00000361729 | chr1       | 23857773  | 23857774  | -63               |
| RRNAD1        | ENST00000519086 | chr1       | 156698677 | 156698678 | -63               |
| LPXN          | ENST00000528489 | chr11      | 58345754  | 58345755  | -63               |
| ANKRD13A      | ENST00000553025 | chr12      | 110436927 | 110436928 | -63               |
| KCNN4         | ENST00000262888 | chr19      | 44285470  | 44285471  | -63               |
| NOP58         | ENST00000264279 | chr2       | 203130375 | 203130376 | -63               |
| NOL12         | ENST00000359114 | chr22      | 38082266  | 38082267  | -63               |
| SKIDA1        | ENST00000449193 | chr10      | 21814671  | 21814672  | -62               |
| TOPORS        | ENST00000360538 | chr9       | 32552611  | 32552612  | -62               |
| CCDC22        | ENST00000376227 | chrX       | 49091864  | 49091865  | -62               |
| RNASEH2C      | ENST00000528220 | chr11      | 65488348  | 65488349  | -61               |
| RP11-146F11.5 | ENST00000563540 | chr16      | 30597166  | 30597167  | -61               |
| BSG           | ENST00000346916 | chr19      | 571235    | 571236    | -61               |
| NDUFAF3       | ENST00000451378 | chr3       | 49058976  | 49058977  | -61               |
| CLCC1         | ENST00000415331 | chr1       | 109506169 | 109506170 | -60               |
| CDKL1         | ENST00000216378 | chr14      | 50864180  | 50864181  | -60               |
| RPL3          | ENST00000216146 | chr22      | 39715834  | 39715835  | -60               |
| OGT           | ENST00000444774 | chrX       | 70754090  | 70754091  | -60               |
| MKRN3         | ENST00000570112 | chr15      | 23810765  | 23810766  | -59               |
| MON1B         | ENST00000439557 | chr16      | 77225029  | 77225030  | -59               |
| WBP1          | ENST00000492047 | chr2       | 74685947  | 74685948  | -59               |
| DDX21         | ENST00000354185 | chr10      | 70715825  | 70715826  | -58               |
| UBR7          | ENST00000554232 | chr14      | 93673527  | 93673528  | -58               |
| SNHG11        | ENST00000453698 | chr20      | 37075162  | 37075163  | -58               |
| TFAP2A        | ENST00000379613 | chr6       | 10415537  | 10415538  | -58               |
| ALG10         | ENST00000538927 | chr12      | 34175345  | 34175346  | -57               |
| KLHL28        | ENST00000556500 | chr14      | 45431225  | 45431226  | -57               |
| TPD52L2       | ENST00000369927 | chr20      | 62496538  | 62496539  | -57               |

**Supplemental Table 2: Genes with significant occupancy of E2F8 at the promoter regions (-5kb to+2kb)**

| <b>Gene Symbol</b> | <b>Ensembl ID</b> | <b>Chromosome</b> | <b>Start</b> | <b>End</b> | <b>distance from TSS</b> |
|--------------------|-------------------|-------------------|--------------|------------|--------------------------|
| KIAA1967           | ENST00000308511   | chr8              | 22462087     | 22462088   | -57                      |
| FAM111A            | ENST00000361723   | chr11             | 58912195     | 58912196   | -56                      |
| PUS7L              | ENST00000344862   | chr12             | 44152674     | 44152675   | -56                      |
| TRIP10             | ENST00000600428   | chr19             | 6737879      | 6737880    | -56                      |
| SLC35A3            | ENST00000533028   | chr1              | 100435936    | 100435937  | -55                      |
| MPZL2              | ENST00000527282   | chr11             | 118135154    | 118135155  | -55                      |
| HSP90AB1           | ENST00000353801   | chr6              | 44214768     | 44214769   | -55                      |
| RP11-276H7.3       | ENST00000426353   | chr1              | 16485706     | 16485707   | -54                      |
| NUCB2              | ENST00000533738   | chr11             | 17297694     | 17297695   | -54                      |
| ZNF273             | ENST00000476120   | chr7              | 64363570     | 64363571   | -54                      |
| XRCC3              | ENST00000352127   | chr14             | 104181892    | 104181893  | -53                      |
| GANC               | ENST00000561871   | chr15             | 42565377     | 42565378   | -53                      |
| C18orf56           | ENST00000323813   | chr18             | 658391       | 658392     | -53                      |
| ERCC1              | ENST00000423698   | chr19             | 45982137     | 45982138   | -53                      |
| DCAF16             | ENST00000382247   | chr4              | 17812432     | 17812433   | -53                      |
| MUS81              | ENST00000525768   | chr11             | 65627963     | 65627964   | -52                      |
| RP11-849H4.2       | ENST00000531488   | chr11             | 71639543     | 71639544   | -52                      |
| HMGA2              | ENST00000354636   | chr12             | 66218187     | 66218188   | -52                      |
| ZNF668             | ENST00000564456   | chr16             | 31085555     | 31085556   | -52                      |
| MCM8               | ENST00000378896   | chr20             | 5931245      | 5931246    | -52                      |
| VPS51              | ENST00000530773   | chr11             | 64863535     | 64863536   | -51                      |
| ZNF384             | ENST00000542605   | chr12             | 6798787      | 6798788    | -51                      |
| CDK4               | ENST00000552254   | chr12             | 58145709     | 58145710   | -51                      |
| DAND5              | ENST00000585548   | chr19             | 13075921     | 13075922   | -51                      |
| C19orf48           | ENST00000391812   | chr19             | 51308023     | 51308024   | -51                      |
| SGOL2              | ENST00000357799   | chr2              | 201390828    | 201390829  | -51                      |
| FGD5-AS1           | ENST00000430166   | chr3              | 14989980     | 14989981   | -51                      |
| RP11-73M7.6        | ENST00000585413   | chr1              | 32110803     | 32110804   | -50                      |
| AARS               | ENST00000261772   | chr16             | 70323494     | 70323495   | -50                      |
| CENPM              | ENST00000402420   | chr22             | 42342781     | 42342782   | -50                      |
| SNRPC              | ENST00000244520   | chr6              | 34725132     | 34725133   | -50                      |
| PEX16              | ENST00000532681   | chr11             | 45940410     | 45940411   | -49                      |
| LARP4              | ENST00000293618   | chr12             | 50794542     | 50794543   | -49                      |
| SGTA               | ENST00000221566   | chr19             | 2783416      | 2783417    | -49                      |
| MTMR9              | ENST00000221086   | chr8              | 11141875     | 11141876   | -49                      |
| SAC3D1             | ENST00000531072   | chr11             | 64808324     | 64808325   | -48                      |
| CTD-2370N5.3       | ENST00000578021   | chr17             | 29645704     | 29645705   | -48                      |
| LSM4               | ENST00000594828   | chr19             | 18433968     | 18433969   | -48                      |
| TAF11              | ENST00000361288   | chr6              | 34855912     | 34855913   | -48                      |
| BUD31              | ENST00000473447   | chr7              | 99006659     | 99006660   | -48                      |

**Supplemental Table 2: Genes with significant occupancy of E2F8 at the promoter regions (-5kb to+2kb)**

| Gene Symbol   | Ensembl ID      | Chromosome | Start     | End       | distance from TSS |
|---------------|-----------------|------------|-----------|-----------|-------------------|
| NCAPG2        | ENST00000432615 | chr7       | 158496441 | 158496442 | -48               |
| CHM           | ENST00000467744 | chrX       | 85302355  | 85302356  | -48               |
| RP11-152N13.5 | ENST00000457147 | chr10      | 75012501  | 75012502  | -47               |
| FARP1         | ENST00000496052 | chr13      | 99056277  | 99056278  | -47               |
| DUT           | ENST00000455976 | chr15      | 48624252  | 48624253  | -47               |
| SCAND2        | ENST00000348993 | chr15      | 85174634  | 85174635  | -47               |
| RP3-388M5.9   | ENST00000563715 | chr22      | 44208288  | 44208289  | -47               |
| AXDND1        | ENST00000511157 | chr1       | 179335060 | 179335061 | -46               |
| MMAB          | ENST00000537236 | chr12      | 110011429 | 110011430 | -46               |
| CEP95         | ENST00000579860 | chr17      | 62502936  | 62502937  | -46               |
| STAMPB        | ENST00000339566 | chr2       | 74056039  | 74056040  | -46               |
| EIF3H         | ENST00000276682 | chr8       | 117778538 | 117778539 | -46               |
| THOC2         | ENST00000355725 | chrX       | 122866950 | 122866951 | -46               |
| FAM111B       | ENST00000411426 | chr11      | 58874612  | 58874613  | -45               |
| RP3-416H24.1  | ENST00000546686 | chr12      | 52641275  | 52641276  | -45               |
| UNG           | ENST00000336865 | chr12      | 109535877 | 109535878 | -45               |
| SAP30BP       | ENST00000355423 | chr17      | 73663380  | 73663381  | -45               |
| KIF2C         | ENST00000455186 | chr1       | 45205580  | 45205581  | -44               |
| PCSK7         | ENST00000524507 | chr11      | 117102626 | 117102627 | -44               |
| C12orf45      | ENST00000552951 | chr12      | 105380043 | 105380044 | -44               |
| TXNDC16       | ENST00000554399 | chr14      | 53019282  | 53019283  | -44               |
| EMC7          | ENST00000256545 | chr15      | 34394191  | 34394192  | -44               |
| NUSAP1        | ENST00000559046 | chr15      | 41625008  | 41625009  | -44               |
| CTD-2521M24.8 | ENST00000597028 | chr19      | 17530625  | 17530626  | -44               |
| DDX18         | ENST00000263239 | chr2       | 118572181 | 118572182 | -44               |
| ASH2L         | ENST00000343823 | chr8       | 37962715  | 37962716  | -44               |
| TXNRD1        | ENST00000378070 | chr12      | 104682452 | 104682453 | -43               |
| NUBP1         | ENST00000574334 | chr16      | 10837599  | 10837600  | -43               |
| RP11-485G7.5  | ENST00000572913 | chr16      | 11439109  | 11439110  | -43               |
| TRIM28        | ENST00000597136 | chr19      | 59059617  | 59059618  | -43               |
| PTMA          | ENST00000448874 | chr2       | 232572296 | 232572297 | -43               |
| DLG1          | ENST00000419354 | chr3       | 197026212 | 197026213 | -43               |
| RP1-265C24.8  | ENST00000565046 | chr6       | 28104583  | 28104584  | -43               |
| BNIP3L        | ENST00000523949 | chr8       | 26240669  | 26240670  | -43               |
| RPS19         | ENST00000598742 | chr19      | 42363945  | 42363946  | -42               |
| CEP128        | ENST00000555265 | chr14      | 81408168  | 81408169  | -41               |
| TMEM101       | ENST00000542039 | chr17      | 42092456  | 42092457  | -41               |
| NDUFAF7       | ENST00000455230 | chr2       | 37458732  | 37458733  | -41               |
| RP4-694B14.5  | ENST00000428254 | chr20      | 25604751  | 25604752  | -41               |
| ZNF1-AS1      | ENST00000326677 | chr20      | 47895137  | 47895138  | -41               |

**Supplemental Table 2: Genes with significant occupancy of E2F8 at the promoter regions (-5kb to+2kb)**

| Gene Symbol   | Ensembl ID      | Chromosome | Start     | End       | distance from TSS |
|---------------|-----------------|------------|-----------|-----------|-------------------|
| CTA-211A9.5   | ENST00000444388 | chr22      | 27068688  | 27068689  | -41               |
| C3orf38       | ENST00000486971 | chr3       | 88199095  | 88199096  | -41               |
| TMEM18        | ENST00000281017 | chr2       | 677477    | 677478    | -40               |
| HIST1H4H      | ENST00000289352 | chr6       | 26285800  | 26285801  | -40               |
| AGPAT1        | ENST00000395499 | chr6       | 32144895  | 32144896  | -40               |
| RPS20         | ENST00000520627 | chr8       | 56987107  | 56987108  | -40               |
| DCTN5         | ENST00000563998 | chr16      | 23652752  | 23652753  | -39               |
| CD68          | ENST00000584502 | chr17      | 7482916   | 7482917   | -39               |
| CUEDC1        | ENST00000581391 | chr17      | 55945863  | 55945864  | -39               |
| TADA3         | ENST00000439043 | chr3       | 9834504   | 9834505   | -39               |
| TBCCD1        | ENST00000446782 | chr3       | 186288144 | 186288145 | -39               |
| UROD          | ENST00000469548 | chr1       | 45478324  | 45478325  | -38               |
| ARMC1         | ENST00000276569 | chr8       | 66546478  | 66546479  | -38               |
| CHTOP         | ENST00000368694 | chr1       | 153606487 | 153606488 | -37               |
| SPRTN         | ENST00000295050 | chr1       | 231473756 | 231473757 | -37               |
| KIAA0895L     | ENST00000563831 | chr16      | 67217524  | 67217525  | -37               |
| C16orf95      | ENST00000253461 | chr16      | 87351057  | 87351058  | -37               |
| PIK3R4        | ENST00000356763 | chr3       | 130465708 | 130465709 | -37               |
| RNF5          | ENST00000375094 | chr6       | 32146093  | 32146094  | -37               |
| ENO1          | ENST00000463324 | chr1       | 8935010   | 8935011   | -36               |
| CREB3L4       | ENST00000405694 | chr1       | 153940309 | 153940310 | -36               |
| ADAM15        | ENST00000473905 | chr1       | 155023005 | 155023006 | -36               |
| COG8          | ENST00000562081 | chr16      | 69373520  | 69373521  | -36               |
| RP11-773H22.4 | ENST00000588211 | chr18      | 12991206  | 12991207  | -36               |
| GOLGB1        | ENST00000340645 | chr3       | 121468636 | 121468637 | -36               |
| SART3         | ENST00000546611 | chr12      | 108955209 | 108955210 | -35               |
| AP2S1         | ENST00000601498 | chr19      | 47353606  | 47353607  | -35               |
| U2            | ENST00000410792 | chr2       | 88316099  | 88316100  | -35               |
| WWTR1-AS1     | ENST00000479752 | chr3       | 149375961 | 149375962 | -35               |
| TRMT13        | ENST00000370143 | chr1       | 100598671 | 100598672 | -34               |
| RP11-613D13.4 | ENST00000528226 | chr11      | 43942574  | 43942575  | -34               |
| RP11-6N17.4   | ENST00000582787 | chr17      | 45973210  | 45973211  | -34               |
| NME1          | ENST00000393196 | chr17      | 49230862  | 49230863  | -34               |
| RP5-1074L1.1  | ENST00000449169 | chr1       | 110881824 | 110881825 | -33               |
| RAD51AP1      | ENST00000536886 | chr12      | 4648001   | 4648002   | -33               |
| LCMT2         | ENST00000305641 | chr15      | 43622834  | 43622835  | -33               |
| SDF2          | ENST00000585428 | chr17      | 26988965  | 26988966  | -33               |
| MADD          | ENST00000453571 | chr11      | 47290679  | 47290680  | -32               |
| GMPR2         | ENST00000355299 | chr14      | 24701595  | 24701596  | -32               |
| GNG2          | ENST00000553560 | chr14      | 52313811  | 52313812  | -32               |

**Supplemental Table 2: Genes with significant occupancy of E2F8 at the promoter regions (-5kb to+2kb)**

| Gene Symbol   | Ensembl ID      | Chromosome | Start     | End       | distance from TSS |
|---------------|-----------------|------------|-----------|-----------|-------------------|
| SPG7          | ENST00000563783 | chr16      | 89557292  | 89557293  | -32               |
| LAMA3         | ENST00000591749 | chr18      | 21407335  | 21407336  | -32               |
| ARSK          | ENST00000380009 | chr5       | 94890745  | 94890746  | -32               |
| ZNF317        | ENST00000247956 | chr19      | 9251024   | 9251025   | -31               |
| DDX60         | ENST00000393743 | chr4       | 169239987 | 169239988 | -31               |
| MTAP          | ENST00000380172 | chr9       | 21802510  | 21802511  | -31               |
| RP11-326A19.3 | ENST00000570120 | chr15      | 89631526  | 89631527  | -30               |
| MIR3676       | ENST00000579470 | chr17      | 8090462   | 8090463   | -30               |
| CWC22         | ENST00000295749 | chr2       | 180871868 | 180871869 | -30               |
| CIDECF        | ENST00000433871 | chr3       | 10065459  | 10065460  | -30               |
| CYCS          | ENST00000409764 | chr7       | 25164907  | 25164908  | -30               |
| METTL2B       | ENST00000262432 | chr7       | 128116752 | 128116753 | -30               |
| YOD1          | ENST00000315927 | chr1       | 207224449 | 207224450 | -29               |
| HIST4H4       | ENST00000537853 | chr12      | 14923237  | 14923238  | -29               |
| RP5-1125A11.1 | ENST00000432859 | chr20      | 32580957  | 32580958  | -29               |
| DSCC1         | ENST00000521795 | chr8       | 120868125 | 120868126 | -29               |
| TPR           | ENST00000367478 | chr1       | 186344483 | 186344484 | -28               |
| BBS4          | ENST00000395205 | chr15      | 72978829  | 72978830  | -28               |
| GCA           | ENST00000473240 | chr2       | 163175321 | 163175322 | -28               |
| AP4M1         | ENST00000422582 | chr7       | 99699655  | 99699656  | -28               |
| MARS          | ENST00000548674 | chr12      | 57881779  | 57881780  | -27               |
| ORC2          | ENST00000234296 | chr2       | 201828428 | 201828429 | -27               |
| MAD2L1BP      | ENST00000451025 | chr6       | 43597249  | 43597250  | -27               |
| VPS45         | ENST00000369130 | chr1       | 150039342 | 150039343 | -26               |
| SMCR7         | ENST00000323019 | chr17      | 18163821  | 18163822  | -26               |
| RAB5C         | ENST00000346213 | chr17      | 40307059  | 40307060  | -26               |
| FAM117A       | ENST00000514018 | chr17      | 47866375  | 47866376  | -26               |
| MED26         | ENST00000598608 | chr19      | 16739897  | 16739898  | -26               |
| ZNF101        | ENST00000444249 | chr19      | 19779633  | 19779634  | -26               |
| CHCHD5        | ENST00000324913 | chr2       | 113341991 | 113341992 | -26               |
| SMARCA5       | ENST00000283131 | chr4       | 144434589 | 144434590 | -26               |
| MYC           | ENST00000524013 | chr8       | 128748439 | 128748440 | -26               |
| MED31         | ENST00000574128 | chr17      | 6554770   | 6554771   | -25               |
| SUMO1         | ENST00000392246 | chr2       | 203103354 | 203103355 | -25               |
| LEF1          | ENST00000505297 | chr4       | 108994075 | 108994076 | -25               |
| AGGF1         | ENST00000312916 | chr5       | 76326184  | 76326185  | -25               |
| KIAA0825      | ENST00000312498 | chr5       | 93954332  | 93954333  | -25               |
| MRPL18        | ENST00000367034 | chr6       | 160211472 | 160211473 | -25               |
| AKR1D1        | ENST00000468877 | chr7       | 137687044 | 137687045 | -25               |
| PLCXD1        | ENST00000415337 | chrX       | 200106    | 200107    | -25               |

**Supplemental Table 2: Genes with significant occupancy of E2F8 at the promoter regions (-5kb to+2kb)**

| Gene Symbol | Ensembl ID      | Chromosome | Start     | End       | distance from TSS |
|-------------|-----------------|------------|-----------|-----------|-------------------|
| KLHL20      | ENST00000479505 | chr1       | 173684055 | 173684056 | -24               |
| ESPL1       | ENST00000257934 | chr12      | 53662058  | 53662059  | -24               |
| MCM3        | ENST00000229854 | chr6       | 52149604  | 52149605  | -24               |
| M6PR        | ENST00000544245 | chr12      | 9102352   | 9102353   | -23               |
| RPL41       | ENST00000546654 | chr12      | 56510528  | 56510529  | -23               |
| WDR24       | ENST00000248142 | chr16      | 740465    | 740466    | -23               |
| PPIL3       | ENST00000497263 | chr2       | 201753810 | 201753811 | -23               |
| EIF2B1      | ENST00000534960 | chr12      | 124118171 | 124118172 | -22               |
| N4BP2L2     | ENST00000505213 | chr13      | 33112990  | 33112991  | -22               |
| COASY       | ENST00000585811 | chr17      | 40714129  | 40714130  | -22               |
| NUP155      | ENST00000381843 | chr5       | 37370907  | 37370908  | -22               |
| PPOX        | ENST00000352210 | chr1       | 161136178 | 161136179 | -21               |
| ANAPC15     | ENST00000545333 | chr11      | 71823516  | 71823517  | -21               |
| ESYT1       | ENST00000394048 | chr12      | 56521818  | 56521819  | -21               |
| SNRPB       | ENST00000339610 | chr20      | 2451450   | 2451451   | -21               |
| COX17       | ENST00000261070 | chr3       | 119396269 | 119396270 | -21               |
| RPL9        | ENST00000295955 | chr4       | 39460587  | 39460588  | -21               |
| DCTN4       | ENST00000521093 | chr5       | 150138217 | 150138218 | -21               |
| PFDN6       | ENST00000374606 | chr6       | 33257350  | 33257351  | -21               |
| PHPT1       | ENST00000463215 | chr9       | 139744209 | 139744210 | -21               |
| HELLS       | ENST00000419900 | chr10      | 96305526  | 96305527  | -20               |
| EEF1G       | ENST00000525340 | chr11      | 62341350  | 62341351  | -20               |
| POLE        | ENST00000539357 | chr12      | 133263969 | 133263970 | -20               |
| KIAA0101    | ENST00000380258 | chr15      | 64673661  | 64673662  | -20               |
| SF3A2       | ENST00000591121 | chr19      | 2236819   | 2236820   | -20               |
| COPE        | ENST00000262812 | chr19      | 19030224  | 19030225  | -20               |
| PFKFB4      | ENST00000412035 | chr3       | 48594468  | 48594469  | -20               |
| LHFPL2      | ENST00000510949 | chr5       | 77886033  | 77886034  | -20               |
| PTK2B       | ENST00000522338 | chr8       | 27169125  | 27169126  | -20               |
| SHC1        | ENST00000366442 | chr1       | 154946888 | 154946889 | -19               |
| U4atac      | ENST00000408512 | chr12      | 890279    | 890280    | -19               |
| AC141586.5  | ENST00000566272 | chr16      | 2653401   | 2653402   | -19               |
| SUPT7L      | ENST00000337768 | chr2       | 27886693  | 27886694  | -19               |
| SNX5        | ENST00000481323 | chr20      | 17949471  | 17949472  | -19               |
| FANCD2      | ENST00000287647 | chr3       | 10068078  | 10068079  | -19               |
| SRP19       | ENST00000503445 | chr5       | 112196865 | 112196866 | -19               |
| CENPQ       | ENST00000371200 | chr6       | 49431120  | 49431121  | -19               |
| LRRC23      | ENST00000428946 | chr12      | 7013979   | 7013980   | -18               |
| WBP11       | ENST00000537574 | chr12      | 14956454  | 14956455  | -18               |
| RNFT2       | ENST00000407967 | chr12      | 117176077 | 117176078 | -18               |



**Supplemental Table 2: Genes with significant occupancy of E2F8 at the promoter regions (-5kb to+2kb)**

| Gene Symbol   | Ensembl ID      | Chromosome | Start     | End       | distance from TSS |
|---------------|-----------------|------------|-----------|-----------|-------------------|
| PNN           | ENST00000554117 | chr14      | 39644467  | 39644468  | -18               |
| PPP1R7        | ENST00000438799 | chr2       | 242088972 | 242088973 | -18               |
| ZNF678        | ENST00000498759 | chr1       | 227751218 | 227751219 | -17               |
| CDCA5         | ENST00000404147 | chr11      | 64851534  | 64851535  | -17               |
| KDM5A         | ENST00000544760 | chr12      | 498463    | 498464    | -17               |
| RP11-338E21.1 | ENST00000546135 | chr12      | 65003254  | 65003255  | -17               |
| RHEB          | ENST00000262187 | chr7       | 151217025 | 151217026 | -17               |
| RP11-195F19.5 | ENST00000421828 | chr9       | 34666061  | 34666062  | -17               |
| TMEM198B      | ENST00000478241 | chr12      | 56223512  | 56223513  | -16               |
| TMEM186       | ENST00000333050 | chr16      | 8891519   | 8891520   | -16               |
| TMEM159       | ENST00000233047 | chr16      | 21169681  | 21169682  | -16               |
| MPDU1         | ENST00000571822 | chr17      | 7487122   | 7487123   | -16               |
| C9orf84       | ENST00000374287 | chr9       | 114557226 | 114557227 | -16               |
| HINFP         | ENST00000350777 | chr11      | 118992281 | 118992282 | -15               |
| TTC23         | ENST00000558613 | chr15      | 99789828  | 99789829  | -15               |
| TMEM208       | ENST00000564087 | chr16      | 67261100  | 67261101  | -15               |
| WRAP53        | ENST00000431639 | chr17      | 7589373   | 7589374   | -15               |
| TK1           | ENST00000586613 | chr17      | 76183157  | 76183158  | -15               |
| RAD54L        | ENST00000469835 | chr1       | 46713426  | 46713427  | -14               |
| EXO1          | ENST00000423131 | chr1       | 242011512 | 242011513 | -14               |
| CCDC94        | ENST00000262962 | chr19      | 4247061   | 4247062   | -14               |
| SNRPD2        | ENST00000588599 | chr19      | 46195041  | 46195042  | -14               |
| RBM39         | ENST00000361162 | chr20      | 34330246  | 34330247  | -14               |
| CLSPN         | ENST00000251195 | chr1       | 36235579  | 36235580  | -13               |
| RRM1          | ENST00000533349 | chr11      | 4116059   | 4116060   | -13               |
| COX14         | ENST00000550487 | chr12      | 50505748  | 50505749  | -13               |
| PMEL          | ENST00000548493 | chr12      | 56360531  | 56360532  | -13               |
| FOXF1-AS1     | ENST00000599749 | chr16      | 86542716  | 86542717  | -13               |
| PET100        | ENST00000594797 | chr19      | 7694609   | 7694610   | -13               |
| ZNF584        | ENST00000594993 | chr19      | 58912924  | 58912925  | -13               |
| EXOC1         | ENST00000346134 | chr4       | 56719827  | 56719828  | -13               |
| RPA3          | ENST00000462723 | chr7       | 7680219   | 7680220   | -13               |
| MRPL37        | ENST00000360840 | chr1       | 54665827  | 54665828  | -12               |
| ST7L          | ENST00000358039 | chr1       | 113162050 | 113162051 | -12               |
| RIN1          | ENST00000424433 | chr11      | 66103887  | 66103888  | -12               |
| ITFG2         | ENST00000228799 | chr12      | 2921775   | 2921776   | -12               |
| RFC3          | ENST00000380071 | chr13      | 34392173  | 34392174  | -12               |
| PABPN1        | ENST00000216727 | chr14      | 23790485  | 23790486  | -12               |
| PIH1D1        | ENST00000601053 | chr19      | 49954797  | 49954798  | -12               |
| TBC1D17       | ENST00000594996 | chr19      | 50380946  | 50380947  | -12               |

**Supplemental Table 2: Genes with significant occupancy of E2F8 at the promoter regions (-5kb to+2kb)**

| Gene Symbol   | Ensembl ID      | Chromosome | Start     | End       | distance from TSS |
|---------------|-----------------|------------|-----------|-----------|-------------------|
| RIF1          | ENST00000453091 | chr2       | 152266384 | 152266385 | -12               |
| CDK5RAP1      | ENST00000339269 | chr20      | 31989377  | 31989378  | -12               |
| RAD18         | ENST00000469793 | chr3       | 9005137   | 9005138   | -12               |
| AC025171.1    | ENST00000505541 | chr5       | 43041846  | 43041847  | -12               |
| DNAJC2        | ENST00000379257 | chr7       | 102985255 | 102985256 | -12               |
| RNASE4        | ENST00000398001 | chr14      | 21152360  | 21152361  | -11               |
| RP11-219B17.1 | ENST00000558235 | chr15      | 60771394  | 60771395  | -11               |
| TTC31         | ENST00000489152 | chr2       | 74710188  | 74710189  | -11               |
| RXRΒ          | ENST00000544186 | chr6       | 33168639  | 33168640  | -11               |
| ZNF451        | ENST00000370708 | chr6       | 56954862  | 56954863  | -11               |
| TUT1          | ENST00000308436 | chr11      | 62359117  | 62359118  | -10               |
| KIAA0753      | ENST00000361413 | chr17      | 6544255   | 6544256   | -10               |
| RMRP          | ENST00000363046 | chr9       | 35658022  | 35658023  | -10               |
| PRPF38A       | ENST00000257181 | chr1       | 52870226  | 52870227  | -9                |
| GPRC5A        | ENST00000537783 | chr12      | 13044483  | 13044484  | -9                |
| RECQL         | ENST00000542432 | chr12      | 21654536  | 21654537  | -9                |
| C16orf93      | ENST00000544487 | chr16      | 30773526  | 30773527  | -9                |
| MLH1          | ENST00000456676 | chr3       | 37035054  | 37035055  | -9                |
| H2AFZ         | ENST00000511203 | chr4       | 100871463 | 100871464 | -9                |
| TMEM39B       | ENST00000336294 | chr1       | 32538494  | 32538495  | -8                |
| PHB2          | ENST00000535923 | chr12      | 7079994   | 7079995   | -8                |
| TMEM116       | ENST00000354825 | chr12      | 112450941 | 112450942 | -8                |
| RNF168        | ENST00000437070 | chr3       | 196230554 | 196230555 | -8                |
| THAP5         | ENST00000484452 | chr7       | 108210138 | 108210139 | -8                |
| RP11-434I12.2 | ENST00000514599 | chr8       | 74268702  | 74268703  | -8                |
| COQ4          | ENST00000300452 | chr9       | 131084806 | 131084807 | -8                |
| FAM212B       | ENST00000444059 | chr1       | 112298451 | 112298452 | -7                |
| RPL23A        | ENST00000582736 | chr17      | 27047001  | 27047002  | -7                |
| RP11-318A15.2 | ENST00000565271 | chr17      | 74668016  | 74668017  | -7                |
| LDLR          | ENST00000558013 | chr19      | 11200146  | 11200147  | -7                |
| OSGEPL1       | ENST00000522700 | chr2       | 190627929 | 190627930 | -7                |
| TM9SF4        | ENST00000398022 | chr20      | 30697301  | 30697302  | -7                |
| CLIC1         | ENST00000395892 | chr6       | 31707545  | 31707546  | -7                |
| STK19         | ENST00000463823 | chr6       | 31940143  | 31940144  | -7                |
| VPS41         | ENST00000265745 | chr7       | 38948796  | 38948797  | -7                |
| POC1B-GALNT4  | ENST00000548729 | chr12      | 89919979  | 89919980  | -6                |
| MRPS31P5      | ENST00000423686 | chr13      | 52768517  | 52768518  | -6                |
| AP5M1         | ENST00000431972 | chr14      | 57735767  | 57735768  | -6                |
| FAM96A        | ENST00000300030 | chr15      | 64386221  | 64386222  | -6                |
| BRCA1         | ENST00000309486 | chr17      | 41277472  | 41277473  | -6                |

**Supplemental Table 2: Genes with significant occupancy of E2F8 at the promoter regions (-5kb to+2kb)**

| <b>Gene Symbol</b> | <b>Ensembl ID</b> | <b>Chromosome</b> | <b>Start</b> | <b>End</b> | <b>distance from TSS</b> |
|--------------------|-------------------|-------------------|--------------|------------|--------------------------|
| RAD1               | ENST00000513914   | chr5              | 34915724     | 34915725   | -6                       |
| NFKBIL1            | ENST00000376148   | chr6              | 31515351     | 31515352   | -6                       |
| MTBP               | ENST00000523373   | chr8              | 121457655    | 121457656  | -6                       |
| OGT                | ENST00000373701   | chrX              | 70752966     | 70752967   | -6                       |
| SCNM1              | ENST00000368905   | chr1              | 151138512    | 151138513  | -5                       |
| DCLRE1A            | ENST00000476112   | chr10             | 115614102    | 115614103  | -5                       |
| PRCP               | ENST00000531801   | chr11             | 82612703     | 82612704   | -5                       |
| HSPA8              | ENST00000532780   | chr11             | 122933380    | 122933381  | -5                       |
| NHLRC3             | ENST00000473371   | chr13             | 39612437     | 39612438   | -5                       |
| C14orf80           | ENST00000421892   | chr14             | 105957396    | 105957397  | -5                       |
| MED9               | ENST00000268711   | chr17             | 17380294     | 17380295   | -5                       |
| AC006486.1         | ENST00000378108   | chr19             | 42746921     | 42746922   | -5                       |
| MRPL30             | ENST00000473743   | chr2              | 99797609     | 99797610   | -5                       |
| ROBO1              | ENST00000436010   | chr3              | 79068612     | 79068613   | -5                       |
| MRPL22             | ENST00000519059   | chr5              | 154320731    | 154320732  | -5                       |
| CUTA               | ENST00000465956   | chr6              | 33385669     | 33385670   | -5                       |
| EEF1A1             | ENST00000316292   | chr6              | 74230744     | 74230745   | -5                       |
| TAF6               | ENST00000453269   | chr7              | 99717024     | 99717025   | -5                       |
| TCEA1              | ENST00000521604   | chr8              | 54935092     | 54935093   | -5                       |
| ARID4A             | ENST00000355431   | chr14             | 58765098     | 58765099   | -4                       |
| LRRC49             | ENST00000559201   | chr15             | 71184805     | 71184806   | -4                       |
| CENPN              | ENST00000569461   | chr16             | 81040823     | 81040824   | -4                       |
| C17orf76-AS1       | ENST00000497774   | chr17             | 16342320     | 16342321   | -4                       |
| CNTD1              | ENST00000591559   | chr17             | 40950883     | 40950884   | -4                       |
| RIOK3              | ENST00000339486   | chr18             | 21032782     | 21032783   | -4                       |
| PPP1R13L           | ENST00000593226   | chr19             | 45909587     | 45909588   | -4                       |
| IRF3               | ENST00000600911   | chr19             | 50168490     | 50168491   | -4                       |
| CCDC12             | ENST00000546280   | chr3              | 47018272     | 47018273   | -4                       |
| SKP2               | ENST00000274254   | chr5              | 36152086     | 36152087   | -4                       |
| NCAPG2             | ENST00000449727   | chr7              | 158497459    | 158497460  | -4                       |
| TXNIP              | ENST00000369317   | chr1              | 145438465    | 145438466  | -3                       |
| IQGAP3             | ENST00000361170   | chr1              | 156542333    | 156542334  | -3                       |
| ABI1               | ENST00000376166   | chr10             | 27149916     | 27149917   | -3                       |
| KDM5A              | ENST00000536014   | chr12             | 497697       | 497698     | -3                       |
| CTC-471J1.8        | ENST00000598982   | chr19             | 52674723     | 52674724   | -3                       |
| DSN1               | ENST00000447406   | chr20             | 35402203     | 35402204   | -3                       |
| DSCR3              | ENST00000475009   | chr21             | 38639705     | 38639706   | -3                       |
| BPNT1              | ENST00000498237   | chr1              | 220263154    | 220263155  | -2                       |
| DPP3               | ENST00000544603   | chr11             | 66247912     | 66247913   | -2                       |
| C1RL               | ENST00000545280   | chr12             | 7261793      | 7261794    | -2                       |

**Supplemental Table 2: Genes with significant occupancy of E2F8 at the promoter regions (-5kb to+2kb)**

| Gene Symbol | Ensembl ID      | Chromosome | Start     | End       | distance from TSS |
|-------------|-----------------|------------|-----------|-----------|-------------------|
| DAZAP2      | ENST00000549041 | chr12      | 51632618  | 51632619  | -2                |
| SHMT2       | ENST00000557740 | chr12      | 57623441  | 57623442  | -2                |
| FAM192A     | ENST00000309137 | chr16      | 57219976  | 57219977  | -2                |
| PLAUR       | ENST00000599546 | chr19      | 44172456  | 44172457  | -2                |
| ZNF230      | ENST00000585568 | chr19      | 44507125  | 44507126  | -2                |
| SAE1        | ENST00000540850 | chr19      | 47634089  | 47634090  | -2                |
| BCL2L12     | ENST00000594157 | chr19      | 50169215  | 50169216  | -2                |
| HSPD1       | ENST00000544407 | chr2       | 198364812 | 198364813 | -2                |
| CDC45       | ENST00000491520 | chr22      | 19467258  | 19467259  | -2                |
| EAF2        | ENST00000273668 | chr3       | 121554059 | 121554060 | -2                |
| DBR1        | ENST00000463982 | chr3       | 137893708 | 137893709 | -2                |
| MYNN        | ENST00000544106 | chr3       | 169492050 | 169492051 | -2                |
| RFC4        | ENST00000494047 | chr3       | 186524257 | 186524258 | -2                |
| MRPS18B     | ENST00000376508 | chr6       | 30585634  | 30585635  | -2                |
| FAM54A      | ENST00000420702 | chr6       | 136571449 | 136571450 | -2                |
| CPT2        | ENST00000371486 | chr1       | 53662099  | 53662100  | -1                |
| TMBIM6      | ENST00000549445 | chr12      | 50135349  | 50135350  | -1                |
| CDK4        | ENST00000257904 | chr12      | 58146303  | 58146304  | -1                |
| ABCD4       | ENST00000298816 | chr14      | 74769671  | 74769672  | -1                |
| ARPP19      | ENST00000567669 | chr15      | 52861363  | 52861364  | -1                |
| MIR22HG     | ENST00000577164 | chr17      | 1620467   | 1620468   | -1                |
| HMGB2       | ENST00000511316 | chr4       | 174255582 | 174255583 | -1                |
| XRCC4       | ENST00000396027 | chr5       | 82373387  | 82373388  | -1                |
| RNGTT       | ENST00000369475 | chr6       | 89673279  | 89673280  | -1                |
| COA1        | ENST00000448704 | chr7       | 43769099  | 43769100  | -1                |
| NUP205      | ENST00000417116 | chr7       | 135242688 | 135242689 | -1                |
| NASP        | ENST00000464190 | chr1       | 46049712  | 46049713  | 1                 |
| SCP2        | ENST00000533119 | chr1       | 53480637  | 53480638  | 1                 |
| EFCAB7      | ENST00000371088 | chr1       | 63989060  | 63989061  | 1                 |
| TPCN1       | ENST00000552985 | chr12      | 113658884 | 113658885 | 1                 |
| EIF2S1      | ENST00000557310 | chr14      | 67827272  | 67827273  | 1                 |
| CDK5RAP3    | ENST00000580670 | chr17      | 46048516  | 46048517  | 1                 |
| ZNF580      | ENST00000592881 | chr19      | 56146381  | 56146382  | 1                 |
| UGGT1       | ENST00000375990 | chr2       | 128848781 | 128848782 | 1                 |
| GUSBP1      | ENST00000509649 | chr5       | 21459605  | 21459606  | 1                 |
| NNT         | ENST00000505678 | chr5       | 43602794  | 43602795  | 1                 |
| GNB2L1      | ENST00000513060 | chr5       | 180670945 | 180670946 | 1                 |
| PNPLA8      | ENST00000453144 | chr7       | 108166757 | 108166758 | 1                 |
| NOL8        | ENST00000433029 | chr9       | 95087650  | 95087651  | 1                 |
| TTF2        | ENST00000464062 | chr1       | 117602965 | 117602966 | 2                 |

**Supplemental Table 2: Genes with significant occupancy of E2F8 at the promoter regions (-5kb to+2kb)**

| <b>Gene Symbol</b> | <b>Ensembl ID</b> | <b>Chromosome</b> | <b>Start</b> | <b>End</b> | <b>distance from TSS</b> |
|--------------------|-------------------|-------------------|--------------|------------|--------------------------|
| EFNA4              | ENST00000359751   | chr1              | 155036213    | 155036214  | 2                        |
| FDPS               | ENST00000471117   | chr1              | 155278654    | 155278655  | 2                        |
| TMEM79             | ENST00000463670   | chr1              | 156252726    | 156252727  | 2                        |
| TIMM10             | ENST00000525587   | chr11             | 57298273     | 57298274   | 2                        |
| MYL6               | ENST00000550184   | chr12             | 56552133     | 56552134   | 2                        |
| TBC1D15            | ENST00000468049   | chr12             | 72233543     | 72233544   | 2                        |
| POP5               | ENST00000357500   | chr12             | 121019198    | 121019199  | 2                        |
| ALDOA              | ENST00000564521   | chr16             | 30075755     | 30075756   | 2                        |
| ABCA10             | ENST00000519732   | chr17             | 67171919     | 67171920   | 2                        |
| TREX1              | ENST00000492235   | chr3              | 48507669     | 48507670   | 2                        |
| ACTL6A             | ENST00000450518   | chr3              | 179280674    | 179280675  | 2                        |
| EXOSC9             | ENST00000511454   | chr4              | 122722480    | 122722481  | 2                        |
| ZBED3-AS1          | ENST00000514114   | chr5              | 76383288     | 76383289   | 2                        |
| PPP1R11            | ENST00000376772   | chr6              | 30034865     | 30034866   | 2                        |
| GNL1               | ENST00000376621   | chr6              | 30524948     | 30524949   | 2                        |
| MRE11A             | ENST00000536550   | chr11             | 94226972     | 94226973   | 3                        |
| FAM60A             | ENST00000337682   | chr12             | 31479302     | 31479303   | 3                        |
| PSMC3IP            | ENST00000586337   | chr17             | 40729702     | 40729703   | 3                        |
| LENG8              | ENST00000326764   | chr19             | 54960066     | 54960067   | 3                        |
| OGG1               | ENST00000302036   | chr3              | 9791629      | 9791630    | 3                        |
| PRIM2              | ENST00000419977   | chr6              | 57182427     | 57182428   | 3                        |
| MRPS28             | ENST00000522987   | chr8              | 80942485     | 80942486   | 3                        |
| DTL                | ENST00000475419   | chr1              | 212209190    | 212209191  | 4                        |
| TFAM               | ENST00000373895   | chr10             | 60145196     | 60145197   | 4                        |
| MGEA5              | ENST00000357797   | chr10             | 103578170    | 103578171  | 4                        |
| NUMA1              | ENST00000540843   | chr11             | 71791535     | 71791536   | 4                        |
| POLD3              | ENST00000527458   | chr11             | 74303652     | 74303653   | 4                        |
| B2M                | ENST00000559720   | chr15             | 45003687     | 45003688   | 4                        |
| B9D1               | ENST00000487415   | chr17             | 19281198     | 19281199   | 4                        |
| PEX12              | ENST00000225873   | chr17             | 33905643     | 33905644   | 4                        |
| AC016683.6         | ENST00000456685   | chr2              | 113969101    | 113969102  | 4                        |
| QTRTD1             | ENST00000460163   | chr3              | 113775816    | 113775817  | 4                        |
| SMC4               | ENST00000472282   | chr3              | 160117433    | 160117434  | 4                        |
| DPH2               | ENST00000495421   | chr1              | 44435685     | 44435686   | 5                        |
| HIPK1              | ENST00000369554   | chr1              | 114471999    | 114472000  | 5                        |
| SCAMP3             | ENST00000480219   | chr1              | 155232114    | 155232115  | 5                        |
| FOXRED1            | ENST00000534011   | chr11             | 126139033    | 126139034  | 5                        |
| DIS3               | ENST00000377780   | chr13             | 73356057     | 73356058   | 5                        |
| MSH6               | ENST00000493177   | chr2              | 48010312     | 48010313   | 5                        |
| EIF6               | ENST00000415116   | chr20             | 33872583     | 33872584   | 5                        |

**Supplemental Table 2: Genes with significant occupancy of E2F8 at the promoter regions (-5kb to+2kb)**

| Gene Symbol   | Ensembl ID      | Chromosome | Start     | End       | distance from TSS |
|---------------|-----------------|------------|-----------|-----------|-------------------|
| NCAPH2        | ENST00000420993 | chr22      | 50946648  | 50946649  | 5                 |
| RP11-53O19.1  | ENST00000505401 | chr5       | 44808822  | 44808823  | 5                 |
| NREP          | ENST00000453526 | chr5       | 111093092 | 111093093 | 5                 |
| ORC3          | ENST00000417380 | chr6       | 88299866  | 88299867  | 5                 |
| MRPL18        | ENST00000479638 | chr6       | 160210921 | 160210922 | 5                 |
| RP11-863K10.7 | ENST00000330539 | chr8       | 37594938  | 37594939  | 5                 |
| MTF2          | ENST00000370303 | chr1       | 93544872  | 93544873  | 6                 |
| MTMR11        | ENST00000482025 | chr1       | 149908755 | 149908756 | 6                 |
| PRCC          | ENST00000353233 | chr1       | 156737350 | 156737351 | 6                 |
| SPCS2         | ENST00000526883 | chr11      | 74660573  | 74660574  | 6                 |
| OGFOD2        | ENST00000536150 | chr12      | 123459278 | 123459279 | 6                 |
| PPP5D1        | ENST00000594701 | chr19      | 47104175  | 47104176  | 6                 |
| FOXP1         | ENST00000498154 | chr3       | 71631097  | 71631098  | 6                 |
| PLSCR1        | ENST00000448787 | chr3       | 146262400 | 146262401 | 6                 |
| UBE2D3        | ENST00000349311 | chr4       | 103748999 | 103749000 | 6                 |
| ZCCHC9        | ENST00000407610 | chr5       | 80597435  | 80597436  | 6                 |
| OARD1         | ENST00000467234 | chr6       | 41040295  | 41040296  | 6                 |
| RRP12         | ENST00000370992 | chr10      | 99161092  | 99161093  | 7                 |
| SLC25A28      | ENST00000496035 | chr10      | 101380358 | 101380359 | 7                 |
| TMEM109       | ENST00000227525 | chr11      | 60681351  | 60681352  | 7                 |
| BANF1         | ENST00000524663 | chr11      | 65769792  | 65769793  | 7                 |
| RP4-761J14.8  | ENST00000407384 | chr12      | 6772431   | 6772432   | 7                 |
| TIPIN         | ENST00000261881 | chr15      | 66649046  | 66649047  | 7                 |
| RAB8A         | ENST00000589697 | chr19      | 16222730  | 16222731  | 7                 |
| C21orf49      | ENST00000382375 | chr21      | 34144416  | 34144417  | 7                 |
| L3MBTL2       | ENST00000216237 | chr22      | 41601214  | 41601215  | 7                 |
| ULK4          | ENST00000459802 | chr3       | 42003561  | 42003562  | 7                 |
| COX16         | ENST00000389912 | chr14      | 70826439  | 70826440  | 8                 |
| ZNF524        | ENST00000589521 | chr19      | 56111394  | 56111395  | 8                 |
| AC034193.5    | ENST00000326237 | chr3       | 10028601  | 10028602  | 8                 |
| ELP3          | ENST00000521938 | chr8       | 27950671  | 27950672  | 8                 |
| CDKN2C        | ENST00000396148 | chr1       | 51434374  | 51434375  | 9                 |
| LDHB          | ENST00000396075 | chr12      | 21810286  | 21810287  | 9                 |
| ALDOA         | ENST00000562240 | chr16      | 30064488  | 30064489  | 9                 |
| AC124789.1    | ENST00000582919 | chr17      | 36608180  | 36608181  | 9                 |
| SYCE2         | ENST00000293695 | chr19      | 13030080  | 13030081  | 9                 |
| CCNL1         | ENST00000461804 | chr3       | 156878539 | 156878540 | 9                 |
| LMAN2         | ENST00000303127 | chr5       | 176778843 | 176778844 | 9                 |
| ZKSCAN4       | ENST00000377294 | chr6       | 28219992  | 28219993  | 9                 |
| DBF4          | ENST00000265728 | chr7       | 87505551  | 87505552  | 9                 |

**Supplemental Table 2: Genes with significant occupancy of E2F8 at the promoter regions (-5kb to+2kb)**

| <b>Gene Symbol</b> | <b>Ensembl ID</b> | <b>Chromosome</b> | <b>Start</b> | <b>End</b> | <b>distance from TSS</b> |
|--------------------|-------------------|-------------------|--------------|------------|--------------------------|
| MCM7               | ENST00000465738   | chr7              | 99698006     | 99698007   | 9                        |
| CDCA3              | ENST00000545368   | chr12             | 6960445      | 6960446    | 10                       |
| ARF3               | ENST00000545855   | chr12             | 49350212     | 49350213   | 10                       |
| AAAS               | ENST00000552161   | chr12             | 53715333     | 53715334   | 10                       |
| NUP107             | ENST00000535718   | chr12             | 69080794     | 69080795   | 10                       |
| SEC11A             | ENST00000558134   | chr15             | 85259309     | 85259310   | 10                       |
| SNRPA              | ENST00000601545   | chr19             | 41256550     | 41256551   | 10                       |
| AP2S1              | ENST00000263270   | chr19             | 47354238     | 47354239   | 10                       |
| AC023347.1         | ENST00000435352   | chr2              | 127066095    | 127066096  | 10                       |
| AC002467.7         | ENST00000440971   | chr7              | 107383415    | 107383416  | 10                       |
| GNL3L              | ENST00000489691   | chrX              | 54556754     | 54556755   | 10                       |
| RP11-515B12.1      | ENST00000509114   | chr12             | 14518425     | 14518426   | 11                       |
| RP11-347C12.10     | ENST00000563252   | chr16             | 30366771     | 30366772   | 11                       |
| RPL27              | ENST00000589037   | chr17             | 41150299     | 41150300   | 11                       |
| PRPF31             | ENST00000445124   | chr19             | 54619168     | 54619169   | 11                       |
| CYP1B1             | ENST00000462864   | chr2              | 38303284     | 38303285   | 11                       |
| HIST1H4C           | ENST00000377803   | chr6              | 26104113     | 26104114   | 11                       |
| DDX11              | ENST00000535317   | chr12             | 31227208     | 31227209   | 12                       |
| CCNT1              | ENST00000417344   | chr12             | 49110445     | 49110446   | 12                       |
| LEO1               | ENST00000315141   | chr15             | 52263960     | 52263961   | 12                       |
| COMMD4             | ENST00000566843   | chr15             | 75628372     | 75628373   | 12                       |
| EME1               | ENST00000338165   | chr17             | 48450591     | 48450592   | 12                       |
| CUL3               | ENST00000497715   | chr2              | 225344828    | 225344829  | 12                       |
| NSUN3              | ENST00000461625   | chr3              | 93781865     | 93781866   | 12                       |
| CDK1               | ENST00000519078   | chr10             | 62538100     | 62538101   | 13                       |
| ELP5               | ENST00000573513   | chr17             | 7155354      | 7155355    | 13                       |
| SIRT2              | ENST00000392081   | chr19             | 39390488     | 39390489   | 13                       |
| MTAP               | ENST00000427788   | chr9              | 21803288     | 21803289   | 13                       |
| RP11-348A11.4      | ENST00000500025   | chr11             | 33183246     | 33183247   | 14                       |
| TTC9C              | ENST00000316461   | chr11             | 62496023     | 62496024   | 14                       |
| TCEB1              | ENST00000518127   | chr8              | 74884507     | 74884508   | 14                       |
| SMC2               | ENST00000374793   | chr9              | 106856619    | 106856620  | 14                       |
| DNTTIP2            | ENST00000496672   | chr1              | 94344696     | 94344697   | 15                       |
| TROVE2             | ENST00000432079   | chr1              | 193028597    | 193028598  | 15                       |
| HNRNPL             | ENST00000221419   | chr19             | 39340957     | 39340958   | 15                       |
| CDKN2B-AS1         | ENST00000584020   | chr9              | 21994914     | 21994915   | 15                       |
| TMEM138            | ENST00000278826   | chr11             | 61129487     | 61129488   | 16                       |
| SLC25A45           | ENST00000526432   | chr11             | 65149405     | 65149406   | 16                       |
| SDSL               | ENST00000403593   | chr12             | 113860056    | 113860057  | 16                       |
| FAM174B            | ENST00000555971   | chr15             | 93353074     | 93353075   | 16                       |

**Supplemental Table 2: Genes with significant occupancy of E2F8 at the promoter regions (-5kb to+2kb)**

| <b>Gene Symbol</b> | <b>Ensembl ID</b> | <b>Chromosome</b> | <b>Start</b> | <b>End</b> | <b>distance from TSS</b> |
|--------------------|-------------------|-------------------|--------------|------------|--------------------------|
| RARA               | ENST00000582914   | chr17             | 38479257     | 38479258   | 16                       |
| C17orf53           | ENST00000585683   | chr17             | 42219290     | 42219291   | 16                       |
| SAE1               | ENST00000594526   | chr19             | 47616712     | 47616713   | 16                       |
| C11orf73           | ENST00000528004   | chr11             | 86013308     | 86013309   | 17                       |
| NUFIP1             | ENST00000379161   | chr13             | 45563600     | 45563601   | 17                       |
| RABEP2             | ENST00000566762   | chr16             | 28947829     | 28947830   | 17                       |
| PRKCSH             | ENST00000591462   | chr19             | 11546124     | 11546125   | 17                       |
| SNRPA              | ENST00000601393   | chr19             | 41257129     | 41257130   | 17                       |
| CENPO              | ENST00000498362   | chr2              | 25016362     | 25016363   | 17                       |
| C20orf196          | ENST00000442185   | chr20             | 5731114      | 5731115    | 17                       |
| DROSHA             | ENST00000511367   | chr5              | 31532150     | 31532151   | 17                       |
| RGL2               | ENST00000497454   | chr6              | 33267083     | 33267084   | 17                       |
| CHRAC1             | ENST00000519618   | chr8              | 141522096    | 141522097  | 17                       |
| PSRC1              | ENST00000474126   | chr1              | 109825639    | 109825640  | 18                       |
| LRTOMT             | ENST00000544409   | chr11             | 71791921     | 71791922   | 18                       |
| KNTC1              | ENST00000333479   | chr12             | 123011811    | 123011812  | 18                       |
| DCAF4              | ENST00000353777   | chr14             | 73393101     | 73393102   | 18                       |
| RPS9               | ENST00000484121   | chr19             | 54704693     | 54704694   | 18                       |
| CEP44              | ENST00000503780   | chr4              | 175204844    | 175204845  | 18                       |
| PAK1IP1            | ENST00000379568   | chr6              | 10694944     | 10694945   | 18                       |
| SNRPE              | ENST00000469451   | chr1              | 203830995    | 203830996  | 19                       |
| KIF18A             | ENST00000526288   | chr11             | 28129672     | 28129673   | 19                       |
| TRAPPC4            | ENST00000533632   | chr11             | 118889159    | 118889160  | 19                       |
| RP5-991G20.1       | ENST00000563328   | chr16             | 72699086     | 72699087   | 19                       |
| EDEM2              | ENST00000542871   | chr20             | 33735121     | 33735122   | 19                       |
| AIMP1              | ENST00000394701   | chr4              | 107237681    | 107237682  | 19                       |
| TRNAI2             | ENST00000459170   | chr6              | 26988131     | 26988132   | 19                       |
| DNTTIP2            | ENST00000460191   | chr1              | 94345453     | 94345454   | 20                       |
| CBX5               | ENST00000550489   | chr12             | 54673934     | 54673935   | 20                       |
| CEP152             | ENST00000559630   | chr15             | 49103252     | 49103253   | 20                       |
| USP37              | ENST00000418019   | chr2              | 219432993    | 219432994  | 20                       |
| SPATA5             | ENST00000422835   | chr4              | 123844274    | 123844275  | 20                       |
| DCLRE1B            | ENST00000466480   | chr1              | 114448050    | 114448051  | 21                       |
| LIN52              | ENST00000554076   | chr14             | 74551685     | 74551686   | 21                       |
| LSMD1              | ENST00000333775   | chr17             | 7761150      | 7761151    | 21                       |
| HAUS1              | ENST00000593165   | chr18             | 43684408     | 43684409   | 22                       |
| SLX4IP             | ENST00000334534   | chr20             | 10415971     | 10415972   | 22                       |
| RP3-406P24.3       | ENST00000415144   | chr6              | 4021426      | 4021427    | 22                       |
| VPS52              | ENST00000436044   | chr6              | 33239694     | 33239695   | 22                       |
| RP11-55L4.2        | ENST00000584676   | chr17             | 9548618      | 9548619    | 23                       |



**Supplemental Table 2: Genes with significant occupancy of E2F8 at the promoter regions (-5kb to+2kb)**

| <b>Gene Symbol</b> | <b>Ensembl ID</b> | <b>Chromosome</b> | <b>Start</b> | <b>End</b> | <b>distance from TSS</b> |
|--------------------|-------------------|-------------------|--------------|------------|--------------------------|
| RAB11B             | ENST00000600719   | chr19             | 8454886      | 8454887    | 23                       |
| AP4M1              | ENST00000439416   | chr7              | 99699235     | 99699236   | 23                       |
| NR1H3              | ENST00000419652   | chr11             | 47279283     | 47279284   | 24                       |
| CTD-2339L15.1      | ENST00000533146   | chr15             | 40987269     | 40987270   | 24                       |
| MSH2               | ENST00000406134   | chr2              | 47630291     | 47630292   | 24                       |
| U2SURP             | ENST00000473835   | chr3              | 142720203    | 142720204  | 24                       |
| RP11-315I20.1      | ENST00000421764   | chr1              | 145507464    | 145507465  | 25                       |
| C11orf10           | ENST00000543510   | chr11             | 61560248     | 61560249   | 25                       |
| CYB5B              | ENST00000514123   | chr16             | 69458545     | 69458546   | 25                       |
| IMMT               | ENST00000410111   | chr2              | 86422867     | 86422868   | 25                       |
| ISG20L2            | ENST00000470713   | chr1              | 156698194    | 156698195  | 26                       |
| RP11-251A15.4      | ENST00000432246   | chr10             | 93557926     | 93557927   | 26                       |
| ATM                | ENST00000527805   | chr11             | 108093235    | 108093236  | 26                       |
| WSB2               | ENST00000537945   | chr12             | 118500188    | 118500189  | 26                       |
| DHX8               | ENST00000262415   | chr17             | 41561358     | 41561359   | 26                       |
| ATP5SL             | ENST00000595407   | chr19             | 41945774     | 41945775   | 26                       |
| CACYBP             | ENST00000461977   | chr1              | 174968632    | 174968633  | 27                       |
| SLC43A3            | ENST00000525474   | chr11             | 57194865     | 57194866   | 27                       |
| POLA2              | ENST00000541089   | chr11             | 65029458     | 65029459   | 27                       |
| DDX12P             | ENST00000440299   | chr12             | 9600781      | 9600782    | 27                       |
| NFATC2IP           | ENST00000564978   | chr16             | 28962153     | 28962154   | 27                       |
| CHRNA1             | ENST00000575379   | chr17             | 7358938      | 7358939    | 27                       |
| DNMT1              | ENST00000592054   | chr19             | 10305274     | 10305275   | 27                       |
| ZNF224             | ENST00000336976   | chr19             | 44598570     | 44598571   | 27                       |
| SMC4               | ENST00000344722   | chr3              | 160118295    | 160118296  | 27                       |
| HNRNPD             | ENST00000507010   | chr4              | 83295269     | 83295270   | 27                       |
| RXRβ               | ENST00000374685   | chr6              | 33168363     | 33168364   | 27                       |
| TNPO3              | ENST00000482320   | chr7              | 128695119    | 128695120  | 27                       |
| DUSP6              | ENST00000308385   | chr12             | 89746153     | 89746154   | 28                       |
| FOXL1              | ENST00000593625   | chr16             | 86610000     | 86610001   | 28                       |
| KHDC1              | ENST00000370384   | chr6              | 74019909     | 74019910   | 28                       |
| DPYSL2             | ENST00000522745   | chr8              | 26435482     | 26435483   | 28                       |
| E2F8               | ENST00000531809   | chr11             | 19262421     | 19262422   | 29                       |
| SRP54              | ENST00000555746   | chr14             | 35451934     | 35451935   | 29                       |
| SEC22C             | ENST00000450981   | chr3              | 42641986     | 42641987   | 29                       |
| VAR2               | ENST00000477288   | chr6              | 30876046     | 30876047   | 29                       |
| TIMM21             | ENST00000577952   | chr18             | 71815801     | 71815802   | 30                       |
| SERPIN1            | ENST00000472747   | chr3              | 167453541    | 167453542  | 30                       |
| HLA-E              | ENST00000493699   | chr6              | 30457317     | 30457318   | 30                       |
| WDR83              | ENST00000547255   | chr19             | 12780396     | 12780397   | 31                       |

**Supplemental Table 2: Genes with significant occupancy of E2F8 at the promoter regions (-5kb to+2kb)**

| <b>Gene Symbol</b> | <b>Ensembl ID</b> | <b>Chromosome</b> | <b>Start</b> | <b>End</b> | <b>distance from TSS</b> |
|--------------------|-------------------|-------------------|--------------|------------|--------------------------|
| ZNF766             | ENST00000599581   | chr19             | 52772875     | 52772876   | 31                       |
| RANBP1             | ENST00000402752   | chr22             | 20104976     | 20104977   | 31                       |
| BTD                | ENST00000449107   | chr3              | 15643169     | 15643170   | 31                       |
| ATAD5              | ENST00000321990   | chr17             | 29159018     | 29159019   | 32                       |
| VMP1               | ENST00000262291   | chr17             | 57784856     | 57784857   | 32                       |
| SARNP              | ENST00000552080   | chr12             | 56211459     | 56211460   | 33                       |
| SETD8              | ENST00000537270   | chr12             | 123868751    | 123868752  | 33                       |
| MIS12              | ENST00000573759   | chr17             | 5389747      | 5389748    | 33                       |
| DHPS               | ENST00000597152   | chr19             | 12792112     | 12792113   | 33                       |
| NUPL2              | ENST00000485250   | chr7              | 23221491     | 23221492   | 33                       |
| PSMB2              | ENST00000373237   | chr1              | 36107410     | 36107411   | 34                       |
| RP11-77122.3       | ENST00000415632   | chr12             | 30948009     | 30948010   | 34                       |
| TFAP4              | ENST00000204517   | chr16             | 4323041      | 4323042    | 34                       |
| XPC                | ENST00000285021   | chr3              | 14220248     | 14220249   | 34                       |
| ZNF443             | ENST00000436821   | chr19             | 12551799     | 12551800   | 35                       |
| ZRANB3             | ENST00000492193   | chr2              | 136288110    | 136288111  | 35                       |
| UTP3               | ENST00000254803   | chr4              | 71554229     | 71554230   | 35                       |
| PDLIM7             | ENST00000504380   | chr5              | 176911438    | 176911439  | 35                       |
| RUSC1              | ENST00000473331   | chr1              | 155295068    | 155295069  | 36                       |
| HIST1H2BC          | ENST00000314332   | chr6              | 26124117     | 26124118   | 36                       |
| PHGDH              | ENST00000462324   | chr1              | 120254564    | 120254565  | 37                       |
| AAAS               | ENST00000547238   | chr12             | 53714954     | 53714955   | 37                       |
| PTGES3             | ENST00000456859   | chr12             | 57082121     | 57082122   | 37                       |
| LINC00441          | ENST00000436963   | chr13             | 48877757     | 48877758   | 37                       |
| DHRS1              | ENST00000561137   | chr14             | 24763824     | 24763825   | 37                       |
| RTTN               | ENST00000581161   | chr18             | 67872898     | 67872899   | 37                       |
| ALKBH6             | ENST00000490483   | chr19             | 36505047     | 36505048   | 37                       |
| TM4SF1             | ENST00000305366   | chr3              | 149095614    | 149095615  | 37                       |
| COMMD10            | ENST00000515539   | chr5              | 115421206    | 115421207  | 37                       |
| TMEM60             | ENST00000257663   | chr7              | 77427859     | 77427860   | 37                       |
| MRPS21             | ENST00000369084   | chr1              | 150266376    | 150266377  | 38                       |
| PRIM1              | ENST00000546761   | chr12             | 57146014     | 57146015   | 38                       |
| RP11-1029J19.5     | ENST00000557778   | chr14             | 102197406    | 102197407  | 38                       |
| SIL1               | ENST00000509400   | chr5              | 138629184    | 138629185  | 38                       |
| SF3A3              | ENST00000461869   | chr1              | 38455707     | 38455708   | 39                       |
| NBR1               | ENST00000589872   | chr17             | 41323297     | 41323298   | 39                       |
| HAX1               | ENST00000328703   | chr1              | 154245025    | 154245026  | 40                       |
| CENPL              | ENST00000495275   | chr1              | 173793570    | 173793571  | 40                       |
| FLJ27352           | ENST00000569691   | chr15             | 55700784     | 55700785   | 40                       |
| IER2               | ENST00000588173   | chr19             | 13262827     | 13262828   | 40                       |

**Supplemental Table 2: Genes with significant occupancy of E2F8 at the promoter regions (-5kb to+2kb)**

| Gene Symbol   | Ensembl ID      | Chromosome | Start     | End       | distance from TSS |
|---------------|-----------------|------------|-----------|-----------|-------------------|
| MMS22L        | ENST00000275053 | chr6       | 97731011  | 97731012  | 40                |
| LRRC46        | ENST00000584809 | chr17      | 45909576  | 45909577  | 41                |
| TFP1          | ENST00000497521 | chr3       | 133380884 | 133380885 | 43                |
| ACE2          | ENST00000471548 | chrX       | 15584366  | 15584367  | 43                |
| RP11-727A23.5 | ENST00000529607 | chr11      | 82904566  | 82904567  | 44                |
| CSDA          | ENST00000540747 | chr12      | 10874950  | 10874951  | 44                |
| CEP97         | ENST00000465011 | chr3       | 101443544 | 101443545 | 44                |
| KBTBD4        | ENST00000529499 | chr11      | 47600445  | 47600446  | 45                |
| SYNGR4        | ENST00000344846 | chr19      | 48867695  | 48867696  | 45                |
| CTB-131B5.4   | ENST00000520928 | chr5       | 139486021 | 139486022 | 45                |
| TFAP2A        | ENST00000474952 | chr6       | 10412233  | 10412234  | 45                |
| PAN2          | ENST00000547994 | chr12      | 56727674  | 56727675  | 46                |
| HAUS8         | ENST00000598517 | chr19      | 17186185  | 17186186  | 46                |
| SEC31A        | ENST00000503210 | chr4       | 83822272  | 83822273  | 46                |
| WDPCP         | ENST00000272321 | chr2       | 63815885  | 63815886  | 47                |
| STK11IP       | ENST00000468584 | chr2       | 220462961 | 220462962 | 47                |
| CCDC167       | ENST00000373408 | chr6       | 37467650  | 37467651  | 47                |
| CD274         | ENST00000492923 | chr9       | 5462980   | 5462981   | 47                |
| CAP1          | ENST00000449311 | chr1       | 40506041  | 40506042  | 48                |
| GBA           | ENST00000428024 | chr1       | 155214604 | 155214605 | 48                |
| U3            | ENST00000390893 | chr17      | 56709148  | 56709149  | 48                |
| HSPB6         | ENST00000592984 | chr19      | 36248931  | 36248932  | 48                |
| PUS10         | ENST00000407787 | chr2       | 61244279  | 61244280  | 48                |
| ING2          | ENST00000434682 | chr4       | 184427406 | 184427407 | 48                |
| APITD1-CORT   | ENST00000465026 | chr1       | 10491362  | 10491363  | 49                |
| TTC9C         | ENST00000294161 | chr11      | 62495631  | 62495632  | 49                |
| MAP3K11       | ENST00000524856 | chr11      | 65382803  | 65382804  | 49                |
| DIAPH3        | ENST00000400330 | chr13      | 60738069  | 60738070  | 49                |
| RNF167        | ENST00000262482 | chr17      | 4843470   | 4843471   | 49                |
| UBB           | ENST00000302182 | chr17      | 16284160  | 16284161  | 49                |
| C4orf21       | ENST00000502805 | chr4       | 113557968 | 113557969 | 49                |
| RP1-151F17.1  | ENST00000423260 | chr6       | 16761416  | 16761417  | 49                |
| C11orf58      | ENST00000228136 | chr11      | 16759996  | 16759997  | 50                |
| PFKM          | ENST00000549003 | chr12      | 48499313  | 48499314  | 50                |
| RP11-141J13.3 | ENST00000574133 | chr17      | 4469095   | 4469096   | 50                |
| MRPS25        | ENST00000449354 | chr3       | 15106716  | 15106717  | 50                |
| ZNF367        | ENST00000375256 | chr9       | 99180560  | 99180561  | 50                |
| KIAA1279      | ENST00000361983 | chr10      | 70748536  | 70748537  | 51                |
| XPO1          | ENST00000443240 | chr2       | 61765709  | 61765710  | 51                |
| TSHZ2         | ENST00000371497 | chr20      | 51588996  | 51588997  | 52                |

**Supplemental Table 2: Genes with significant occupancy of E2F8 at the promoter regions (-5kb to+2kb)**

| <b>Gene Symbol</b> | <b>Ensembl ID</b> | <b>Chromosome</b> | <b>Start</b> | <b>End</b> | <b>distance from TSS</b> |
|--------------------|-------------------|-------------------|--------------|------------|--------------------------|
| EIF4A2             | ENST00000445596   | chr3              | 186501144    | 186501145  | 52                       |
| SRSF3              | ENST00000477442   | chr6              | 36562218     | 36562219   | 52                       |
| CDC123             | ENST00000281141   | chr10             | 12238016     | 12238017   | 53                       |
| ITFG3              | ENST00000399932   | chr16             | 284596       | 284597     | 53                       |
| ZBTB4              | ENST00000311403   | chr17             | 7387528      | 7387529    | 53                       |
| RP11-68I3.7        | ENST00000584986   | chr17             | 27919205     | 27919206   | 53                       |
| FHL2               | ENST00000409177   | chr2              | 106016070    | 106016071  | 53                       |
| ELL3               | ENST00000433927   | chr15             | 44069458     | 44069459   | 54                       |
| ZNF142             | ENST00000450765   | chr2              | 219524323    | 219524324  | 54                       |
| SYF2               | ENST00000474160   | chr1              | 25558867     | 25558868   | 55                       |
| CDC20B             | ENST00000513180   | chr5              | 54468787     | 54468788   | 55                       |
| STMN1              | ENST00000446334   | chr1              | 26231923     | 26231924   | 56                       |
| ENSA               | ENST00000513281   | chr1              | 150601535    | 150601536  | 56                       |
| RP11-810P12.5      | ENST00000524942   | chr11             | 61849599     | 61849600   | 56                       |
| MTHFD1             | ENST00000555709   | chr14             | 64854813     | 64854814   | 56                       |
| CLN3               | ENST00000360019   | chr16             | 28503566     | 28503567   | 56                       |
| GGCX               | ENST00000473665   | chr2              | 85781590     | 85781591   | 56                       |
| TTI1               | ENST00000373448   | chr20             | 36661806     | 36661807   | 56                       |
| ISY1               | ENST00000393295   | chr3              | 128880079    | 128880080  | 56                       |
| RP11-293M10.2      | ENST00000555909   | chr14             | 75726169     | 75726170   | 57                       |
| RPL32P3            | ENST00000506593   | chr3              | 129118440    | 129118441  | 57                       |
| MCM4               | ENST00000519170   | chr8              | 48874112     | 48874113   | 57                       |
| U6                 | ENST00000411377   | chrX              | 48816485     | 48816486   | 57                       |
| AC004854.4         | ENST00000443162   | chr7              | 44888071     | 44888072   | 58                       |
| GIN53              | ENST00000318129   | chr16             | 58426355     | 58426356   | 59                       |
| TJAP1              | ENST00000372449   | chr6              | 43445369     | 43445370   | 60                       |
| RP11-351A11.1      | ENST00000518570   | chr6              | 119256008    | 119256009  | 60                       |
| TROAP              | ENST00000551567   | chr12             | 49717216     | 49717217   | 61                       |
| ZWILCH             | ENST00000307897   | chr15             | 66797356     | 66797357   | 61                       |
| MBNL1              | ENST00000355460   | chr3              | 151986316    | 151986317  | 61                       |
| NAF1               | ENST00000502973   | chr4              | 164087842    | 164087843  | 61                       |
| TUSC1              | ENST00000358022   | chr9              | 25678794     | 25678795   | 61                       |
| EIF2S3             | ENST00000253039   | chrX              | 24072892     | 24072893   | 61                       |
| POC1A              | ENST00000394970   | chr3              | 52188643     | 52188644   | 62                       |
| NOC3L              | ENST00000371361   | chr10             | 96122632     | 96122633   | 63                       |
| PNKP               | ENST00000594661   | chr19             | 50370194     | 50370195   | 63                       |
| CCDC51             | ENST00000395694   | chr3              | 48481411     | 48481412   | 63                       |
| LMNB1              | ENST00000395354   | chr5              | 126112942    | 126112943  | 63                       |
| HRH1               | ENST00000413416   | chr3              | 11267779     | 11267780   | 64                       |
| CCNL1              | ENST00000467081   | chr3              | 156877165    | 156877166  | 64                       |

**Supplemental Table 2: Genes with significant occupancy of E2F8 at the promoter regions (-5kb to+2kb)**

| <b>Gene Symbol</b> | <b>Ensembl ID</b> | <b>Chromosome</b> | <b>Start</b> | <b>End</b> | <b>distance from TSS</b> |
|--------------------|-------------------|-------------------|--------------|------------|--------------------------|
| DHFR               | ENST00000513314   | chr5              | 79949789     | 79949790   | 64                       |
| RP11-231D20.2      | ENST00000518213   | chr8              | 42128650     | 42128651   | 64                       |
| RCC1               | ENST00000419074   | chr1              | 28836652     | 28836653   | 65                       |
| ERBB2              | ENST00000406381   | chr17             | 37844456     | 37844457   | 65                       |
| ZNF503-AS2         | ENST00000425916   | chr10             | 77162876     | 77162877   | 66                       |
| CHEK1              | ENST00000534685   | chr11             | 125495967    | 125495968  | 67                       |
| RAD51B             | ENST00000488612   | chr14             | 68286611     | 68286612   | 67                       |
| PSMC5              | ENST00000310144   | chr17             | 61904608     | 61904609   | 67                       |
| SUPT4H1            | ENST00000577396   | chr17             | 56429715     | 56429716   | 68                       |
| KHK                | ENST00000429697   | chr2              | 27309728     | 27309729   | 68                       |
| OXSR1              | ENST00000492714   | chr3              | 38206646     | 38206647   | 68                       |
| DPM2               | ENST00000473360   | chr9              | 130699989    | 130699990  | 68                       |
| KIFC1              | ENST00000428849   | chr6              | 33359380     | 33359381   | 69                       |
| ATL3               | ENST00000538786   | chr11             | 63439310     | 63439311   | 70                       |
| SLC1A3             | ENST00000505202   | chr5              | 36607060     | 36607061   | 70                       |
| CASP2              | ENST00000350623   | chr7              | 142985612    | 142985613  | 70                       |
| PARP1              | ENST00000366790   | chr1              | 226595611    | 226595612  | 71                       |
| DCLRE1C            | ENST00000378289   | chr10             | 14996359     | 14996360   | 71                       |
| MIR4500            | ENST00000579472   | chr13             | 88270923     | 88270924   | 71                       |
| RPA2               | ENST00000373912   | chr1              | 28241181     | 28241182   | 72                       |
| EAF1               | ENST00000396842   | chr3              | 15468933     | 15468934   | 73                       |
| RFC2               | ENST00000470266   | chr7              | 73668565     | 73668566   | 73                       |
| TMEM69             | ENST00000372025   | chr1              | 46152958     | 46152959   | 74                       |
| NCAPD3             | ENST00000525964   | chr11             | 134094035    | 134094036  | 74                       |
| DNAJC14            | ENST00000357606   | chr12             | 56224489     | 56224490   | 75                       |
| COG4               | ENST00000534772   | chr16             | 70557027     | 70557028   | 75                       |
| LAGE3              | ENST00000357360   | chrX              | 153707520    | 153707521  | 75                       |
| LRRC41             | ENST00000343304   | chr1              | 46769203     | 46769204   | 76                       |
| BYSL               | ENST00000230340   | chr6              | 41889000     | 41889001   | 76                       |
| MYL6B              | ENST00000549380   | chr12             | 56551474     | 56551475   | 77                       |
| CCDC159            | ENST00000589477   | chr19             | 11457332     | 11457333   | 77                       |
| VPRBP              | ENST00000504652   | chr3              | 51533932     | 51533933   | 77                       |
| CEP57              | ENST00000537677   | chr11             | 95523205     | 95523206   | 78                       |
| CCDC82             | ENST00000538597   | chr11             | 96122497     | 96122498   | 78                       |
| CTD-3014M21.4      | ENST00000592135   | chr17             | 41465601     | 41465602   | 78                       |
| ETV1               | ENST00000403685   | chr7              | 14030795     | 14030796   | 78                       |
| NDUFS2             | ENST00000392179   | chr1              | 161172015    | 161172016  | 80                       |
| TSSK6              | ENST00000585580   | chr19             | 19626923     | 19626924   | 80                       |
| DARS               | ENST00000441323   | chr2              | 136743373    | 136743374  | 80                       |
| FAM104B            | ENST00000478918   | chrX              | 55187293     | 55187294   | 80                       |

**Supplemental Table 2: Genes with significant occupancy of E2F8 at the promoter regions (-5kb to+2kb)**

| <b>Gene Symbol</b> | <b>Ensembl ID</b> | <b>Chromosome</b> | <b>Start</b> | <b>End</b> | <b>distance from TSS</b> |
|--------------------|-------------------|-------------------|--------------|------------|--------------------------|
| LONP1              | ENST00000540670   | chr19             | 5720500      | 5720501    | 82                       |
| RBM34              | ENST00000468751   | chr1              | 235324402    | 235324403  | 83                       |
| LINC00669          | ENST00000591629   | chr18             | 37380198     | 37380199   | 83                       |
| MRPS18C            | ENST00000505719   | chr4              | 84377324     | 84377325   | 83                       |
| CDC6               | ENST00000577249   | chr17             | 38444241     | 38444242   | 84                       |
| TGOLN2             | ENST00000282120   | chr2              | 85555289     | 85555290   | 84                       |
| ZMYND8             | ENST00000311275   | chr20             | 45984316     | 45984317   | 84                       |
| POLR2H             | ENST00000460083   | chr3              | 184080313    | 184080314  | 84                       |
| SLFNL1             | ENST00000359345   | chr1              | 41488823     | 41488824   | 85                       |
| TMEM59             | ENST00000452421   | chr1              | 54518992     | 54518993   | 85                       |
| AHCYL1             | ENST00000393614   | chr1              | 110546838    | 110546839  | 85                       |
| METTL20            | ENST00000395763   | chr12             | 31812204     | 31812205   | 85                       |
| WDR81              | ENST00000446363   | chr17             | 1619979      | 1619980    | 86                       |
| LINC00473          | ENST00000581850   | chr6              | 166401315    | 166401316  | 86                       |
| ZBTB8OS            | ENST00000479075   | chr1              | 33116416     | 33116417   | 87                       |
| ERH                | ENST00000557016   | chr14             | 69865256     | 69865257   | 87                       |
| GART               | ENST00000426819   | chr21             | 34915011     | 34915012   | 87                       |
| SF3B5              | ENST00000367569   | chr6              | 144416666    | 144416667  | 87                       |
| NDUFAF6            | ENST00000519136   | chr8              | 95908150     | 95908151   | 87                       |
| MYL12A             | ENST00000217652   | chr18             | 3247614      | 3247615    | 88                       |
| ASTE1              | ENST00000514044   | chr3              | 130745547    | 130745548  | 88                       |
| TUBB               | ENST00000396384   | chr6              | 30689562     | 30689563   | 88                       |
| OTUD5              | ENST00000428668   | chrX              | 48815559     | 48815560   | 88                       |
| PSMA1              | ENST00000396394   | chr11             | 14542152     | 14542153   | 89                       |
| PPP2R3C            | ENST00000553273   | chr14             | 35591377     | 35591378   | 89                       |
| PAGR1              | ENST00000320330   | chr16             | 29827372     | 29827373   | 89                       |
| EIF2S1             | ENST00000256383   | chr14             | 67826802     | 67826803   | 90                       |
| ZCCHC8             | ENST00000536663   | chr12             | 122984703    | 122984704  | 91                       |
| RP11-10O17.2       | ENST00000568853   | chr15             | 74753774     | 74753775   | 91                       |
| UBXN8              | ENST00000518239   | chr8              | 30601796     | 30601797   | 91                       |
| CDC7               | ENST00000234626   | chr1              | 91966540     | 91966541   | 92                       |
| CDCA5              | ENST00000462902   | chr11             | 64851275     | 64851276   | 92                       |
| RNF121             | ENST00000530137   | chr11             | 71640218     | 71640219   | 92                       |
| LRMP               | ENST00000361433   | chr12             | 25205296     | 25205297   | 92                       |
| SREK1IP1           | ENST00000495198   | chr5              | 64064353     | 64064354   | 92                       |
| C11orf65           | ENST00000525729   | chr11             | 108338164    | 108338165  | 93                       |
| RNF219             | ENST00000282003   | chr13             | 79233220     | 79233221   | 93                       |
| C19orf60           | ENST00000595077   | chr19             | 18700773     | 18700774   | 93                       |
| KRT17              | ENST00000463128   | chr17             | 39780999     | 39781000   | 94                       |
| POLD1              | ENST00000593887   | chr19             | 50887722     | 50887723   | 94                       |

**Supplemental Table 2: Genes with significant occupancy of E2F8 at the promoter regions (-5kb to+2kb)**

| <b>Gene Symbol</b> | <b>Ensembl ID</b> | <b>Chromosome</b> | <b>Start</b> | <b>End</b> | <b>distance from TSS</b> |
|--------------------|-------------------|-------------------|--------------|------------|--------------------------|
| TLK1               | ENST00000486857   | chr2              | 171948224    | 171948225  | 95                       |
| PRSS16             | ENST00000478690   | chr6              | 27219194     | 27219195   | 95                       |
| RP5-890E16.2       | ENST00000578660   | chr17             | 46125315     | 46125316   | 96                       |
| PARP4              | ENST00000381989   | chr13             | 25086850     | 25086851   | 97                       |
| ALDH3A2            | ENST00000580550   | chr17             | 19551582     | 19551583   | 97                       |
| RP11-516C1.1       | ENST00000558047   | chr15             | 44719243     | 44719244   | 98                       |
| LAPTM4A            | ENST00000175091   | chr2              | 20251690     | 20251691   | 98                       |
| IWS1               | ENST00000409725   | chr2              | 128284363    | 128284364  | 98                       |
| RFC4               | ENST00000411792   | chr3              | 186524748    | 186524749  | 98                       |
| RP4-616B8.4        | ENST00000570096   | chr20             | 37590653     | 37590654   | 100                      |
| MAFA               | ENST00000528185   | chr8              | 144511967    | 144511968  | 100                      |
| RIBC2              | ENST00000538017   | chr22             | 45809673     | 45809674   | 101                      |
| RP1-197B17.3       | ENST00000547799   | chr12             | 48099968     | 48099969   | 102                      |
| WDR76              | ENST00000452115   | chr15             | 44119286     | 44119287   | 102                      |
| UBE4B              | ENST00000377153   | chr1              | 10093433     | 10093434   | 103                      |
| RP11-408H20.2      | ENST00000581836   | chr18             | 28681653     | 28681654   | 104                      |
| BLZF1              | ENST00000426663   | chr1              | 169337578    | 169337579  | 105                      |
| SLC39A8            | ENST00000514000   | chr4              | 103266488    | 103266489  | 105                      |
| RPL37              | ENST00000504562   | chr5              | 40835182     | 40835183   | 105                      |
| RP11-418J17.1      | ENST00000440150   | chr1              | 119683152    | 119683153  | 106                      |
| RP11-466F5.8       | ENST00000423121   | chr1              | 165738270    | 165738271  | 106                      |
| TOE1               | ENST00000372090   | chr1              | 45805448     | 45805449   | 108                      |
| ARHGEF12           | ENST00000528681   | chr11             | 120347815    | 120347816  | 108                      |
| NR2C2AP            | ENST00000537399   | chr19             | 19314046     | 19314047   | 108                      |
| CBLB               | ENST00000545639   | chr3              | 105588134    | 105588135  | 108                      |
| NUP214             | ENST00000451030   | chr9              | 134001087    | 134001088  | 108                      |
| FCF1               | ENST00000553673   | chr14             | 75180014     | 75180015   | 109                      |
| WDR53              | ENST00000425888   | chr3              | 196295283    | 196295284  | 109                      |
| ZCWPW1             | ENST00000360951   | chr7              | 100026176    | 100026177  | 110                      |
| XRCC2              | ENST00000359321   | chr7              | 152373139    | 152373140  | 110                      |
| GPR137             | ENST00000546139   | chr11             | 64037643     | 64037644   | 111                      |
| SHQ1               | ENST00000444040   | chr3              | 72897454     | 72897455   | 111                      |
| AC005076.5         | ENST00000433446   | chr7              | 86781486     | 86781487   | 111                      |
| HDLBP              | ENST00000413241   | chr2              | 242254974    | 242254975  | 112                      |
| LEKR1              | ENST00000485017   | chr3              | 156544581    | 156544582  | 112                      |
| ZRANB2             | ENST00000370920   | chr1              | 71546866     | 71546867   | 113                      |
| CSTF1              | ENST00000428552   | chr20             | 54967578     | 54967579   | 113                      |
| SNRPD1             | ENST00000582475   | chr18             | 19192404     | 19192405   | 114                      |
| TM2D1              | ENST00000371180   | chr1              | 62190979     | 62190980   | 115                      |
| LIG1               | ENST00000263274   | chr19             | 48673743     | 48673744   | 116                      |

**Supplemental Table 2: Genes with significant occupancy of E2F8 at the promoter regions (-5kb to+2kb)**

| Gene Symbol   | Ensembl ID      | Chromosome | Start     | End       | distance from TSS |
|---------------|-----------------|------------|-----------|-----------|-------------------|
| MSH6          | ENST00000455383 | chr2       | 48010839  | 48010840  | 117               |
| SLC1A5        | ENST00000412532 | chr19      | 47290480  | 47290481  | 118               |
| RBAK          | ENST00000407184 | chr7       | 5023465   | 5023466   | 118               |
| CTD-2047H16.2 | ENST00000576808 | chr17      | 78289568  | 78289569  | 119               |
| MPV17         | ENST00000492879 | chr2       | 27545809  | 27545810  | 119               |
| MCM2          | ENST00000480910 | chr3       | 127317822 | 127317823 | 119               |
| RP5-1073O3.2  | ENST00000418238 | chr1       | 114355348 | 114355349 | 120               |
| RP11-24M17.4  | ENST00000569596 | chr15      | 76051025  | 76051026  | 120               |
| GPANK1        | ENST00000456540 | chr6       | 31632841  | 31632842  | 120               |
| U1            | ENST00000364829 | chr1       | 144534157 | 144534158 | 121               |
| SEC22B        | ENST00000453618 | chr1       | 145096340 | 145096341 | 122               |
| C1orf106      | ENST00000367342 | chr1       | 200860590 | 200860591 | 123               |
| RP11-31F15.1  | ENST00000420168 | chr1       | 113499264 | 113499265 | 124               |
| Y_RNA         | ENST00000364918 | chr12      | 45274626  | 45274627  | 125               |
| UBC           | ENST00000541046 | chr12      | 125399352 | 125399353 | 125               |
| ADPRHL1       | ENST00000413169 | chr13      | 114103730 | 114103731 | 125               |
| MGST3         | ENST00000367889 | chr1       | 165600222 | 165600223 | 126               |
| TIMM8A        | ENST00000372902 | chrX       | 100604056 | 100604057 | 127               |
| ACYP1         | ENST00000555135 | chr14      | 75530581  | 75530582  | 128               |
| PTN           | ENST00000393083 | chr7       | 137028391 | 137028392 | 128               |
| ITGA7         | ENST00000553893 | chr12      | 56109684  | 56109685  | 129               |
| CCNE2         | ENST00000521809 | chr8       | 95907296  | 95907297  | 129               |
| U1            | ENST00000363009 | chr1       | 147735879 | 147735880 | 130               |
| RRM2          | ENST00000474701 | chr2       | 10263426  | 10263427  | 130               |
| PSMD13        | ENST00000532097 | chr11      | 236675    | 236676    | 131               |
| BAZ2A         | ENST00000550730 | chr12      | 57030468  | 57030469  | 131               |
| CCDC111       | ENST00000515152 | chr4       | 185571064 | 185571065 | 131               |
| DDB2          | ENST00000378601 | chr11      | 47236623  | 47236624  | 132               |
| AC017099.3    | ENST00000450072 | chr2       | 98280810  | 98280811  | 132               |
| PAICS         | ENST00000505164 | chr4       | 57302048  | 57302049  | 132               |
| RFX3          | ENST00000382004 | chr9       | 3525850   | 3525851   | 132               |
| MLF1IP        | ENST00000514781 | chr4       | 185654434 | 185654435 | 133               |
| C1orf216      | ENST00000270815 | chr1       | 36184938  | 36184939  | 134               |
| CALM2         | ENST00000484408 | chr2       | 47403457  | 47403458  | 134               |
| HINT2         | ENST00000474908 | chr9       | 35815214  | 35815215  | 134               |
| RP11-973N13.4 | ENST00000554918 | chr14      | 65006950  | 65006951  | 135               |
| RP11-361D15.2 | ENST00000560199 | chr15      | 59980849  | 59980850  | 135               |
| MCL1          | ENST00000464132 | chr1       | 150551116 | 150551117 | 136               |
| MASTL         | ENST00000375940 | chr10      | 27444433  | 27444434  | 136               |
| Z83844.1      | ENST00000456099 | chr22      | 38054246  | 38054247  | 137               |



**Supplemental Table 2: Genes with significant occupancy of E2F8 at the promoter regions (-5kb to+2kb)**

| <b>Gene Symbol</b> | <b>Ensembl ID</b> | <b>Chromosome</b> | <b>Start</b> | <b>End</b> | <b>distance from TSS</b> |
|--------------------|-------------------|-------------------|--------------|------------|--------------------------|
| CTD-2527I21.7      | ENST00000600959   | chr19             | 35490934     | 35490935   | 139                      |
| EED                | ENST00000528180   | chr11             | 85955933     | 85955934   | 140                      |
| ARHGAP5-AS1        | ENST00000553596   | chr14             | 32545858     | 32545859   | 140                      |
| SNRPA1             | ENST00000560496   | chr15             | 101834969    | 101834970  | 140                      |
| ERGIC2             | ENST00000546839   | chr12             | 29533940     | 29533941   | 142                      |
| ATF7IP             | ENST00000536444   | chr12             | 14518804     | 14518805   | 143                      |
| GINS2              | ENST00000253462   | chr16             | 85722461     | 85722462   | 143                      |
| SUGP2              | ENST00000456085   | chr19             | 19141694     | 19141695   | 144                      |
| PPWD1              | ENST00000511908   | chr5              | 64859268     | 64859269   | 144                      |
| DUSP11             | ENST00000480948   | chr2              | 74006859     | 74006860   | 145                      |
| SYNCRIP            | ENST00000369622   | chr6              | 86352856     | 86352857   | 146                      |
| LETM2              | ENST00000518121   | chr8              | 38244207     | 38244208   | 146                      |
| SCYL3              | ENST00000423670   | chr1              | 169863260    | 169863261  | 147                      |
| USP54              | ENST00000339859   | chr10             | 75385260     | 75385261   | 147                      |
| RP11-580I16.2      | ENST00000582389   | chr17             | 45726620     | 45726621   | 147                      |
| DGKA               | ENST00000548407   | chr12             | 56325402     | 56325403   | 148                      |
| RP11-756H6.1       | ENST00000547552   | chr12             | 57825045     | 57825046   | 148                      |
| SNX15              | ENST00000525648   | chr11             | 64795168     | 64795169   | 150                      |
| TRIM56             | ENST00000412507   | chr7              | 100728951    | 100728952  | 150                      |
| CTD-2083E4.6       | ENST00000512642   | chr5              | 271479       | 271480     | 151                      |
| CYP1B1-AS1         | ENST00000589303   | chr2              | 38303788     | 38303789   | 152                      |
| C1orf112           | ENST00000459772   | chr1              | 169764372    | 169764373  | 154                      |
| ZNF184             | ENST00000211936   | chr6              | 27440742     | 27440743   | 154                      |
| THAP9-AS1          | ENST00000504718   | chr4              | 83821498     | 83821499   | 156                      |
| PPIL1              | ENST00000373699   | chr6              | 36842643     | 36842644   | 156                      |
| AIDA               | ENST00000541237   | chr1              | 222886368    | 222886369  | 157                      |
| FSTL3              | ENST00000591573   | chr19             | 680908       | 680909     | 159                      |
| PER1               | ENST00000584202   | chr17             | 8059512      | 8059513    | 160                      |
| TRIM37             | ENST00000583945   | chr17             | 57089605     | 57089606   | 162                      |
| DAXX               | ENST00000446511   | chr6              | 33290417     | 33290418   | 162                      |
| RP11-284F21.7      | ENST00000448869   | chr1              | 156631052    | 156631053  | 163                      |
| C17orf64           | ENST00000428000   | chr17             | 58470088     | 58470089   | 163                      |
| U1                 | ENST00000365538   | chr1              | 147806721    | 147806722  | 164                      |
| EXOSC5             | ENST00000602129   | chr19             | 41902995     | 41902996   | 165                      |
| ZNF143             | ENST00000396604   | chr11             | 9482233      | 9482234    | 166                      |
| XRCC5              | ENST00000417391   | chr2              | 216974238    | 216974239  | 166                      |
| RP11-387D10.2      | ENST00000558105   | chr15             | 91260111     | 91260112   | 168                      |
| EHBP1              | ENST00000467436   | chr2              | 62933614     | 62933615   | 168                      |
| SECISBP2           | ENST00000534113   | chr9              | 91933932     | 91933933   | 168                      |
| UQCRH              | ENST00000496387   | chr1              | 46769549     | 46769550   | 170                      |

**Supplemental Table 2: Genes with significant occupancy of E2F8 at the promoter regions (-5kb to+2kb)**

| <b>Gene Symbol</b> | <b>Ensembl ID</b> | <b>Chromosome</b> | <b>Start</b> | <b>End</b> | <b>distance from TSS</b> |
|--------------------|-------------------|-------------------|--------------|------------|--------------------------|
| TAF1A              | ENST00000391883   | chr1              | 222762930    | 222762931  | 170                      |
| KRTAP21-4P         | ENST00000454921   | chr21             | 32114739     | 32114740   | 173                      |
| FDFT1              | ENST00000525551   | chr8              | 11660777     | 11660778   | 175                      |
| SGK494             | ENST00000461399   | chr17             | 26940449     | 26940450   | 177                      |
| CTD-3014M21.4      | ENST00000586231   | chr17             | 41466388     | 41466389   | 178                      |
| RP11-455G16.1      | ENST00000326780   | chr4              | 120133487    | 120133488  | 179                      |
| MIS12              | ENST00000381165   | chr17             | 5390425      | 5390426    | 180                      |
| TNFAIP1            | ENST00000582302   | chr17             | 26663671     | 26663672   | 180                      |
| PCNA               | ENST00000379160   | chr20             | 5107091      | 5107092    | 180                      |
| PHF17              | ENST00000514740   | chr4              | 129731364    | 129731365  | 180                      |
| PRPF40B            | ENST00000551063   | chr12             | 49962334     | 49962335   | 181                      |
| RAD51              | ENST00000526763   | chr15             | 40987840     | 40987841   | 181                      |
| RP11-739L10.1      | ENST00000578831   | chr18             | 20513545     | 20513546   | 181                      |
| DMC1               | ENST00000439567   | chr22             | 38965954     | 38965955   | 181                      |
| BLM                | ENST00000559724   | chr15             | 91260815     | 91260816   | 182                      |
| CDK5RAP3           | ENST00000584168   | chr17             | 46048909     | 46048910   | 183                      |
| AC092573.3         | ENST00000437243   | chr2              | 174220752    | 174220753  | 183                      |
| ANAPC5             | ENST00000536837   | chr12             | 121837514    | 121837515  | 184                      |
| LCN12              | ENST00000484304   | chr9              | 139844185    | 139844186  | 184                      |
| FAF1               | ENST00000487898   | chr1              | 51425224     | 51425225   | 185                      |
| GPD2               | ENST00000540309   | chr2              | 157293180    | 157293181  | 185                      |
| LIAS               | ENST00000515061   | chr4              | 39460923     | 39460924   | 185                      |
| BRD4               | ENST00000602230   | chr19             | 15375023     | 15375024   | 187                      |
| ACTR6              | ENST00000551652   | chr12             | 100593086    | 100593087  | 188                      |
| EXOSC2             | ENST00000463488   | chr9              | 133569379    | 133569380  | 188                      |
| LEPREL4            | ENST00000355468   | chr17             | 39968665     | 39968666   | 189                      |
| CTC-453G23.8       | ENST00000595201   | chr19             | 48707527     | 48707528   | 189                      |
| WRN                | ENST00000298139   | chr8              | 30891504     | 30891505   | 189                      |
| TATDN2             | ENST00000448281   | chr3              | 10290787     | 10290788   | 193                      |
| TARS               | ENST00000513066   | chr5              | 33441293     | 33441294   | 193                      |
| CDK17              | ENST00000552262   | chr12             | 96792947     | 96792948   | 194                      |
| CLASP2             | ENST00000464961   | chr3              | 33546745     | 33546746   | 197                      |
| RP11-110I1.12      | ENST00000526453   | chr11             | 118868515    | 118868516  | 198                      |
| RPS21              | ENST00000370592   | chr20             | 60962577     | 60962578   | 198                      |
| ESYT2              | ENST00000483958   | chr7              | 158620133    | 158620134  | 198                      |
| RCOR3              | ENST00000533469   | chr1              | 211431947    | 211431948  | 199                      |
| ACAT2              | ENST00000367048   | chr6              | 160181558    | 160181559  | 200                      |
| HAUS5              | ENST00000428854   | chr19             | 36103903     | 36103904   | 203                      |
| ARL6IP6            | ENST00000425034   | chr2              | 153575674    | 153575675  | 203                      |
| CHAC1              | ENST00000446533   | chr15             | 41245549     | 41245550   | 204                      |

**Supplemental Table 2: Genes with significant occupancy of E2F8 at the promoter regions (-5kb to+2kb)**

| Gene Symbol   | Ensembl ID      | Chromosome | Start     | End       | distance from TSS |
|---------------|-----------------|------------|-----------|-----------|-------------------|
| UBE2D3        | ENST00000508238 | chr4       | 103789813 | 103789814 | 204               |
| FANCG         | ENST00000462124 | chr9       | 35079459  | 35079460  | 206               |
| TAF2          | ENST00000521007 | chr8       | 120844866 | 120844867 | 207               |
| NUP160        | ENST00000530326 | chr11      | 47869654  | 47869655  | 210               |
| AC115115.4    | ENST00000449927 | chr2       | 113103796 | 113103797 | 210               |
| U6            | ENST00000363690 | chr17      | 61650493  | 61650494  | 212               |
| PPM1B         | ENST00000419807 | chr2       | 44395318  | 44395319  | 212               |
| NME1-NME2     | ENST00000513177 | chr17      | 49243387  | 49243388  | 213               |
| EZH2          | ENST00000476773 | chr7       | 148580387 | 148580388 | 213               |
| NDUFC1        | ENST00000394223 | chr4       | 140223417 | 140223418 | 215               |
| C2            | ENST00000497706 | chr6       | 31865778  | 31865779  | 216               |
| GORAB         | ENST00000464798 | chr1       | 170501528 | 170501529 | 217               |
| CCBL1         | ENST00000320665 | chr9       | 131643989 | 131643990 | 218               |
| ZC3H18        | ENST00000567085 | chr16      | 88653242  | 88653243  | 219               |
| MRPL24        | ENST00000434558 | chr1       | 156711161 | 156711162 | 220               |
| ZCRB1         | ENST00000551102 | chr12      | 42719578  | 42719579  | 220               |
| SKP2          | ENST00000513263 | chr5       | 36152489  | 36152490  | 220               |
| RP11-459F6.3  | ENST00000569580 | chr16      | 58163652  | 58163653  | 221               |
| LRCH4         | ENST00000467201 | chr7       | 100178274 | 100178275 | 221               |
| KANSL3        | ENST00000487070 | chr2       | 97303534  | 97303535  | 222               |
| RP11-159F24.2 | ENST00000511991 | chr5       | 43336486  | 43336487  | 222               |
| RPS20         | ENST00000523936 | chr8       | 56986692  | 56986693  | 222               |
| PHF3          | ENST00000509330 | chr6       | 64346607  | 64346608  | 223               |
| UBE2N         | ENST00000549833 | chr12      | 93834807  | 93834808  | 224               |
| LIMCH1        | ENST00000513024 | chr4       | 41361846  | 41361847  | 224               |
| GMNN          | ENST00000476555 | chr6       | 24775919  | 24775920  | 226               |
| ZMAT2         | ENST00000274712 | chr5       | 140080144 | 140080145 | 227               |
| CTDSPL2       | ENST00000558968 | chr15      | 44720238  | 44720239  | 228               |
| EHD2          | ENST00000540884 | chr19      | 48233100  | 48233101  | 228               |
| SUCO          | ENST00000367723 | chr1       | 172501716 | 172501717 | 229               |
| ACTN1-AS1     | ENST00000553944 | chr14      | 69446986  | 69446987  | 230               |
| TMEM237       | ENST00000463205 | chr2       | 202507144 | 202507145 | 231               |
| MYO19         | ENST00000586886 | chr17      | 34890384  | 34890385  | 232               |
| SGK3          | ENST00000518388 | chr8       | 67688032  | 67688033  | 233               |
| CCNE2         | ENST00000520509 | chr8       | 95908672  | 95908673  | 233               |
| BX470102.3    | ENST00000420695 | chr1       | 153506312 | 153506313 | 235               |
| TMEM97        | ENST00000336687 | chr17      | 26646714  | 26646715  | 235               |
| UMPS          | ENST00000460034 | chr3       | 124449532 | 124449533 | 235               |
| MATR3         | ENST00000504023 | chr5       | 138630562 | 138630563 | 237               |
| ARHGAP1       | ENST00000311956 | chr11      | 46721909  | 46721910  | 239               |

**Supplemental Table 2: Genes with significant occupancy of E2F8 at the promoter regions (-5kb to+2kb)**

| <b>Gene Symbol</b> | <b>Ensembl ID</b> | <b>Chromosome</b> | <b>Start</b> | <b>End</b> | <b>distance from TSS</b> |
|--------------------|-------------------|-------------------|--------------|------------|--------------------------|
| HYDIN              | ENST00000538382   | chr16             | 71209299     | 71209300   | 241                      |
| SRP9               | ENST00000366838   | chr1              | 225965877    | 225965878  | 242                      |
| TMEM123            | ENST00000526676   | chr11             | 102322843    | 102322844  | 242                      |
| RP11-331F9.4       | ENST00000428948   | chr9              | 35646507     | 35646508   | 242                      |
| IPO5               | ENST00000475420   | chr13             | 98628126     | 98628127   | 243                      |
| GAPDH              | ENST00000229239   | chr12             | 6643335      | 6643336    | 244                      |
| RP11-524O1.4       | ENST00000565098   | chr14             | 21852693     | 21852694   | 244                      |
| NUDT1              | ENST00000454650   | chr7              | 2282154      | 2282155    | 244                      |
| TAF12              | ENST00000263974   | chr1              | 28969271     | 28969272   | 245                      |
| RGS2               | ENST00000487236   | chr1              | 192778516    | 192778517  | 245                      |
| C2orf81            | ENST00000518863   | chr2              | 74648472     | 74648473   | 245                      |
| MECOM              | ENST00000464456   | chr3              | 168865276    | 168865277  | 245                      |
| RP11-390B4.5       | ENST00000563601   | chr10             | 17685630     | 17685631   | 246                      |
| TIMELESS           | ENST00000554616   | chr12             | 56842931     | 56842932   | 248                      |
| C2CD3              | ENST00000544293   | chr11             | 73881663     | 73881664   | 249                      |
| ATP2A1             | ENST00000536376   | chr16             | 28891621     | 28891622   | 249                      |
| KIF24              | ENST00000345050   | chr9              | 34328948     | 34328949   | 249                      |
| C14orf159          | ENST00000522837   | chr14             | 91527424     | 91527425   | 250                      |
| WDHD1              | ENST00000455555   | chr14             | 55493517     | 55493518   | 251                      |
| RP11-342M1.2       | ENST00000416809   | chr1              | 43311780     | 43311781   | 252                      |
| METTL13            | ENST00000361735   | chr1              | 171751092    | 171751093  | 252                      |
| DERL2              | ENST00000571476   | chr17             | 5389214      | 5389215    | 253                      |
| CAMLG              | ENST00000514518   | chr5              | 134074524    | 134074525  | 253                      |
| AP001462.6         | ENST00000594089   | chr11             | 64546678     | 64546679   | 254                      |
| ALDH7A1            | ENST00000509459   | chr5              | 125930508    | 125930509  | 254                      |
| LIPT2              | ENST00000527115   | chr11             | 74204103     | 74204104   | 256                      |
| CNGA4              | ENST00000533426   | chr11             | 6256250      | 6256251    | 257                      |
| RSBN1L-AS1         | ENST00000447009   | chr7              | 77325312     | 77325313   | 257                      |
| NSL1               | ENST00000366978   | chr1              | 212964664    | 212964665  | 258                      |
| WDR74              | ENST00000525239   | chr11             | 62609020     | 62609021   | 260                      |
| RP11-150C16.1      | ENST00000547590   | chr12             | 59314678     | 59314679   | 260                      |
| TRIM37             | ENST00000580122   | chr17             | 57183559     | 57183560   | 260                      |
| POC5               | ENST00000507421   | chr5              | 75012908     | 75012909   | 260                      |
| RPP30              | ENST00000277882   | chr10             | 92632002     | 92632003   | 264                      |
| PFN1               | ENST00000225655   | chr17             | 4852042      | 4852043    | 266                      |
| POLR3C             | ENST00000466003   | chr1              | 145610462    | 145610463  | 267                      |
| MRRF               | ENST00000470366   | chr9              | 125027472    | 125027473  | 269                      |
| U1                 | ENST00000365207   | chr17             | 56736394     | 56736395   | 271                      |
| XXbac-BPG249D20.9  | ENST00000415195   | chr6              | 30484313     | 30484314   | 272                      |
| MIR3193            | ENST00000578262   | chr20             | 30195260     | 30195261   | 273                      |

**Supplemental Table 2: Genes with significant occupancy of E2F8 at the promoter regions (-5kb to+2kb)**

| Gene Symbol  | Ensembl ID      | Chromosome      | Start     | End       | distance from TSS |     |
|--------------|-----------------|-----------------|-----------|-----------|-------------------|-----|
| SUPT5H       | ENST00000594990 | chr19           | 39927068  | 39927069  | 274               |     |
| SMC1A        | ENST00000375340 | chrX            | 53449327  | 53449328  | 275               |     |
| METTL21B     | ENST00000548256 | chr12           | 58165550  | 58165551  | 277               |     |
| CENPH        | ENST00000502689 | chr5            | 68485844  | 68485845  | 277               |     |
| AC092865.1   | ENST00000408177 | chr12           | 8519558   | 8519559   | 278               |     |
| AC116562.1   | ENST00000408374 | chr4            | 4086337   | 4086338   | 278               |     |
| KBTBD2       | ENST00000424468 | chr7            | 32932066  | 32932067  | 278               |     |
| ZNF562       | ENST00000453372 | chr19           | 9785440   | 9785441   | 279               |     |
| FANCI        | ENST00000565522 | chr15           | 89787759  | 89787760  | 280               |     |
| FAM173B      | ENST00000504390 | chr5            | 10249716  | 10249717  | 280               |     |
| TMEM209      | ENST00000462753 | chr7            | 129844906 | 129844907 | 281               |     |
| AP000974.1   | ENST00000544076 | chr11           | 85565703  | 85565704  | 282               |     |
| PRPF3        | ENST00000414970 | chr1            | 150294283 | 150294284 | 283               |     |
| AL603831.1   | ENST00000579524 | chr10           | 323407    | 323408    | 285               |     |
| TCHP         | ENST00000536408 | chr12           | 110338697 | 110338698 | 285               |     |
| HMMR         | ENST00000517936 | chr5            | 162887949 | 162887950 | 285               |     |
| SHKBP1       | ENST00000597649 | chr19           | 41091764  | 41091765  | 287               |     |
| RP4-798C17.6 | ENST00000476560 | chr7            | 144051943 | 144051944 | 287               |     |
| PNP          | ENST00000553591 | chr14           | 20937987  | 20937988  | 289               |     |
| GOSR2        | ENST00000570879 | chr17           | 45000850  | 45000851  | 289               |     |
| NFKBIB       | ENST00000313582 | chr19           | 39390926  | 39390927  | 289               |     |
| MORF4L1      | ENST00000559258 | chr15           | 79165673  | 79165674  | 290               |     |
| TAGLN2       | ENST00000368096 | chr1            | 159893215 | 159893216 | 291               |     |
| AC004924.1   | ENST00000408626 | chr11           | 67700974  | 67700975  | 291               |     |
| HAT1         | ENST00000494601 | chr2            | 172779406 | 172779407 | 291               |     |
| TRANK1       | ENST00000463764 | chr3            | 36949717  | 36949718  | 291               |     |
| HIGD2B       | ENST00000311755 | chr15           | 72978197  | 72978198  | 292               |     |
| S100A10      | ENST00000368809 | chr1            | 151964759 | 151964760 | 294               |     |
| PHKG2        | ENST00000569762 | chr16           | 30760457  | 30760458  | 294               |     |
| CBX3         | ENST00000497498 | chr7            | 26242375  | 26242376  | 294               |     |
| CDC27P2      | ENST00000425026 | chrY            | 10029612  | 10029613  | 294               |     |
|              | 10-Sep          | ENST00000411469 | chr2      | 110370785 | 110370786         | 295 |
| OMG          | ENST00000584094 | chr17           | 29600342  | 29600343  | 297               |     |
| JRKL         | ENST00000458427 | chr11           | 96123454  | 96123455  | 298               |     |
| APEX2        | ENST00000471758 | chrX            | 55027123  | 55027124  | 299               |     |
| AC009120.4   | ENST00000569389 | chr16           | 74330348  | 74330349  | 300               |     |
| ARMC5        | ENST00000268314 | chr16           | 31470618  | 31470619  | 303               |     |
| PP13439      | ENST00000331659 | chr3            | 171527410 | 171527411 | 303               |     |
| ATP6AP1      | ENST00000484908 | chrX            | 153660369 | 153660370 | 303               |     |
| C19orf57     | ENST00000454313 | chr19           | 14016604  | 14016605  | 304               |     |

**Supplemental Table 2: Genes with significant occupancy of E2F8 at the promoter regions (-5kb to+2kb)**

| <b>Gene Symbol</b> | <b>Ensembl ID</b> | <b>Chromosome</b> | <b>Start</b> | <b>End</b> | <b>distance from TSS</b> |
|--------------------|-------------------|-------------------|--------------|------------|--------------------------|
| CENPK              | ENST00000508311   | chr5              | 64858645     | 64858646   | 304                      |
| C4orf27            | ENST00000506125   | chr4              | 170678747    | 170678748  | 307                      |
| TMEM241            | ENST00000542162   | chr18             | 21017506     | 21017507   | 310                      |
| SLC25A25           | ENST00000433501   | chr9              | 130861144    | 130861145  | 310                      |
| NOC3L              | ENST00000371361   | chr10             | 96122384     | 96122385   | 311                      |
| C5orf22            | ENST00000504464   | chr5              | 31532732     | 31532733   | 311                      |
| RAD51C             | ENST00000584617   | chr17             | 56770335     | 56770336   | 313                      |
| RPSAP52            | ENST00000489520   | chr12             | 66220436     | 66220437   | 317                      |
| RP1-117B12.4       | ENST00000511627   | chr17             | 48474114     | 48474115   | 317                      |
| RFC1               | ENST00000504849   | chr4              | 39367634     | 39367635   | 320                      |
| BCL6               | ENST00000480458   | chr3              | 187462903    | 187462904  | 321                      |
| SFR1               | ENST00000336358   | chr10             | 105882325    | 105882326  | 322                      |
| RP11-49C24.1       | ENST00000562874   | chr16             | 70610527     | 70610528   | 325                      |
| NOD1               | ENST00000413433   | chr7              | 30517926     | 30517927   | 325                      |
| KRT7               | ENST00000552322   | chr12             | 52638486     | 52638487   | 326                      |
| KRT7               | ENST00000548657   | chr12             | 52639547     | 52639548   | 326                      |
| MBD1               | ENST00000585595   | chr18             | 47807350     | 47807351   | 326                      |
| CTD-2203K17.1      | ENST00000507251   | chr5              | 33440398     | 33440399   | 326                      |
| SPATS2             | ENST00000552171   | chr12             | 49761655     | 49761656   | 327                      |
| MIR7-3HG           | ENST00000588758   | chr19             | 4769618      | 4769619    | 327                      |
| CTD-2571L23.8      | ENST00000599924   | chr19             | 48111106     | 48111107   | 327                      |
| RP11-65I12.1       | ENST00000553319   | chr2              | 113998632    | 113998633  | 327                      |
| RBMS1              | ENST00000475103   | chr2              | 161132866    | 161132867  | 329                      |
| TIPIN              | ENST00000367709   | chr15             | 66648692     | 66648693   | 330                      |
| LUC7L3             | ENST00000507200   | chr17             | 48797491     | 48797492   | 330                      |
| CLK1               | ENST00000481641   | chr2              | 201728643    | 201728644  | 331                      |
| ARGLU1             | ENST00000360629   | chr13             | 107219638    | 107219639  | 332                      |
| CTB-157D17.1       | ENST00000524264   | chr5              | 153825039    | 153825040  | 333                      |
| FADS2              | ENST00000574708   | chr11             | 61560784     | 61560785   | 334                      |
| DLGAP1-AS1         | ENST00000573355   | chr18             | 3594787      | 3594788    | 336                      |
| TOR3A              | ENST00000367627   | chr1              | 179050847    | 179050848  | 337                      |
| WSB2               | ENST00000441406   | chr12             | 118499636    | 118499637  | 342                      |
| WIBG               | ENST00000302533   | chr12             | 56320551     | 56320552   | 343                      |
| NUP188             | ENST00000550219   | chr9              | 131710637    | 131710638  | 343                      |
| PHLPP2             | ENST00000568954   | chr16             | 71758258     | 71758259   | 345                      |
| SNRPD1             | ENST00000582475   | chr18             | 19192636     | 19192637   | 346                      |
| DENND6A            | ENST00000464875   | chr3              | 57678224     | 57678225   | 346                      |
| STK4               | ENST00000487587   | chr20             | 43595539     | 43595540   | 347                      |
| SIGMAR1            | ENST00000478146   | chr9              | 34637061     | 34637062   | 347                      |
| FOXP1              | ENST00000313071   | chr14             | 29236633     | 29236634   | 348                      |

**Supplemental Table 2: Genes with significant occupancy of E2F8 at the promoter regions (-5kb to+2kb)**

| <b>Gene Symbol</b> | <b>Ensembl ID</b> | <b>Chromosome</b> | <b>Start</b> | <b>End</b> | <b>distance from TSS</b> |
|--------------------|-------------------|-------------------|--------------|------------|--------------------------|
| PTP4A2             | ENST00000475464   | chr1              | 32403033     | 32403034   | 349                      |
| HKR1               | ENST00000587570   | chr19             | 37804127     | 37804128   | 349                      |
| SAE1               | ENST00000392776   | chr19             | 47634499     | 47634500   | 349                      |
| ATAD2              | ENST00000519124   | chr8              | 124408269    | 124408270  | 349                      |
| MIR3678            | ENST00000578455   | chr17             | 73402499     | 73402500   | 351                      |
| RP11-112J3.15      | ENST00000425499   | chr9              | 35757585     | 35757586   | 351                      |
| PLEKHA6            | ENST00000564627   | chr1              | 204346440    | 204346441  | 352                      |
| HIPK3              | ENST00000525975   | chr11             | 33278568     | 33278569   | 352                      |
| STK24              | ENST00000481288   | chr13             | 99228105     | 99228106   | 352                      |
| MIR3188            | ENST00000583494   | chr19             | 18393237     | 18393238   | 352                      |
| MIR487B            | ENST00000385021   | chr14             | 101513144    | 101513145  | 354                      |
| CDC45              | ENST00000487669   | chr22             | 19468025     | 19468026   | 354                      |
| VRK2               | ENST00000428021   | chr2              | 58274363     | 58274364   | 355                      |
| WDR33              | ENST00000408998   | chr2              | 128568171    | 128568172  | 355                      |
| XRN2               | ENST00000539513   | chr20             | 21284785     | 21284786   | 355                      |
| CYB5R4             | ENST00000369679   | chr6              | 84569729     | 84569730   | 356                      |
| MYPOP              | ENST00000322217   | chr19             | 46405504     | 46405505   | 357                      |
| SPRED2             | ENST00000443619   | chr2              | 65593425     | 65593426   | 358                      |
| SUPT16H            | ENST00000556309   | chr14             | 21851744     | 21851745   | 360                      |
| LCMT2              | ENST00000544735   | chr15             | 43622409     | 43622410   | 363                      |
| CIC                | ENST00000575839   | chr19             | 42784505     | 42784506   | 365                      |
| KRT1               | ENST00000252244   | chr12             | 53073824     | 53073825   | 366                      |
| YEATS4             | ENST00000552955   | chr12             | 69753925     | 69753926   | 368                      |
| ZBTB9              | ENST00000487326   | chr6              | 33422726     | 33422727   | 368                      |
| CHTF8              | ENST00000398235   | chr16             | 69165679     | 69165680   | 369                      |
| USP1               | ENST00000339950   | chr1              | 62902696     | 62902697   | 372                      |
| RP11-313D6.3       | ENST00000416249   | chr10             | 112629871    | 112629872  | 372                      |
| COX5A              | ENST00000568517   | chr15             | 75229744     | 75229745   | 372                      |
| GIN1               | ENST00000513747   | chr5              | 102455420    | 102455421  | 372                      |
| CTD-2527I21.7      | ENST00000600959   | chr19             | 35490699     | 35490700   | 374                      |
| DHX9               | ENST00000483416   | chr1              | 182809242    | 182809243  | 375                      |
| DERA               | ENST00000532964   | chr12             | 16064670     | 16064671   | 375                      |
| CTD-2296D1.4       | ENST00000513219   | chr5              | 7372811      | 7372812    | 375                      |
| PFN1               | ENST00000574872   | chr17             | 4850386      | 4850387    | 377                      |
| E2F6               | ENST00000455198   | chr2              | 11605623     | 11605624   | 381                      |
| TCF19              | ENST00000376255   | chr6              | 31126703     | 31126704   | 381                      |
| TP53               | ENST00000514944   | chr17             | 7590362      | 7590363    | 382                      |
| AC023797.1         | ENST00000441644   | chr3              | 196359072    | 196359073  | 385                      |
| SCML1              | ENST00000419185   | chrX              | 17756229     | 17756230   | 386                      |
| SLC35C2            | ENST00000484188   | chr20             | 44992609     | 44992610   | 390                      |

**Supplemental Table 2: Genes with significant occupancy of E2F8 at the promoter regions (-5kb to+2kb)**

| Gene Symbol | Ensembl ID      | Chromosome | Start     | End       | distance from TSS |
|-------------|-----------------|------------|-----------|-----------|-------------------|
| EMBP1       | ENST00000458200 | chr1       | 121261533 | 121261534 | 392               |
| RNU4-1      | ENST00000363925 | chr12      | 120730647 | 120730648 | 392               |
| AAGAB       | ENST00000558725 | chr15      | 67546599  | 67546600  | 392               |
| DDX23       | ENST00000551098 | chr12      | 49245527  | 49245528  | 393               |
| CRCP        | ENST00000486848 | chr7       | 65580237  | 65580238  | 393               |
| SKA2        | ENST00000583380 | chr17      | 57232139  | 57232140  | 395               |
| TM9SF4      | ENST00000417389 | chr20      | 30697963  | 30697964  | 395               |
| CIDCEP      | ENST00000445082 | chr3       | 10067614  | 10067615  | 395               |
| NRAS        | ENST00000369535 | chr1       | 115259118 | 115259119 | 396               |
| SLC25A25    | ENST00000373069 | chr9       | 130830966 | 130830967 | 396               |
| PHGDH       | ENST00000462324 | chr1       | 120254924 | 120254925 | 397               |
| HIST1H2BD   | ENST00000289316 | chr6       | 26158769  | 26158770  | 397               |
| CHAF1A      | ENST00000585854 | chr19      | 4403110   | 4403111   | 398               |
| KLHDC3      | ENST00000244670 | chr6       | 42982384  | 42982385  | 399               |
| HSPB11      | ENST00000488884 | chr1       | 54410872  | 54410873  | 402               |
| ZMYM4       | ENST00000441447 | chr1       | 35735035  | 35735036  | 403               |
| EED         | ENST00000525244 | chr11      | 85956711  | 85956712  | 403               |
| GPS2        | ENST00000574458 | chr17      | 7216185   | 7216186   | 403               |
| TTLL9       | ENST00000375922 | chr20      | 30468033  | 30468034  | 403               |
| TOR1B       | ENST00000427860 | chr9       | 132565951 | 132565952 | 406               |
| RPL23AP79   | ENST00000595439 | chr19      | 59098057  | 59098058  | 407               |
| CAB39L      | ENST00000410043 | chr13      | 50017780  | 50017781  | 408               |
| COA1        | ENST00000459713 | chr7       | 43687944  | 43687945  | 408               |
| ADAM17      | ENST00000478059 | chr2       | 9695493   | 9695494   | 409               |
| WHSC1L1     | ENST00000529223 | chr8       | 38238839  | 38238840  | 409               |
| SRSF7       | ENST00000415527 | chr2       | 38977869  | 38977870  | 410               |
| SOCS6       | ENST00000578377 | chr18      | 67964246  | 67964247  | 413               |
| NUBP2       | ENST00000564227 | chr16      | 1833438   | 1833439   | 416               |
| MCM10       | ENST00000484800 | chr10      | 13203994  | 13203995  | 417               |
| IGSF11      | ENST00000494802 | chr3       | 118864422 | 118864423 | 417               |
| RP11-86H7.7 | ENST00000435559 | chr1       | 95089320  | 95089321  | 419               |
| MRPL11      | ENST00000534488 | chr11      | 66205877  | 66205878  | 419               |
| BRCA2       | ENST00000530893 | chr13      | 32890060  | 32890061  | 420               |
| TNFRSF1A    | ENST00000366159 | chr12      | 6450592   | 6450593   | 421               |
| MELK        | ENST00000487398 | chr9       | 36573340  | 36573341  | 421               |
| RRAGB       | ENST00000262850 | chrX       | 55744739  | 55744740  | 423               |
| AP2A1       | ENST00000597774 | chr19      | 50270815  | 50270816  | 424               |
| HDDC3       | ENST00000561036 | chr15      | 91475279  | 91475280  | 426               |
| RING1       | ENST00000374656 | chr6       | 33176696  | 33176697  | 426               |
| NUMBL       | ENST00000598773 | chr19      | 41195069  | 41195070  | 427               |



**Supplemental Table 2: Genes with significant occupancy of E2F8 at the promoter regions (-5kb to+2kb)**

| <b>Gene Symbol</b> | <b>Ensembl ID</b> | <b>Chromosome</b> | <b>Start</b> | <b>End</b> | <b>distance from TSS</b> |
|--------------------|-------------------|-------------------|--------------|------------|--------------------------|
| HIST1H4A           | ENST00000359907   | chr6              | 26022332     | 26022333   | 427                      |
| NCAPD3             | ENST00000533155   | chr11             | 134093406    | 134093407  | 428                      |
| ZNHIT3             | ENST00000588357   | chr17             | 34842999     | 34843000   | 429                      |
| PALD1              | ENST00000426268   | chr10             | 72299902     | 72299903   | 434                      |
| AC090340.1         | ENST00000581316   | chr18             | 55103485     | 55103486   | 434                      |
| C16orf95           | ENST00000567970   | chr16             | 87350548     | 87350549   | 437                      |
| TNFAIP8            | ENST00000388882   | chr5              | 118604884    | 118604885  | 437                      |
| SZRD1              | ENST00000475078   | chr1              | 16679507     | 16679508   | 439                      |
| SETD5-AS1          | ENST00000521267   | chr3              | 9437848      | 9437849    | 440                      |
| SLC29A1            | ENST00000371713   | chr6              | 44191998     | 44191999   | 440                      |
| RBM14              | ENST00000461478   | chr11             | 66385054     | 66385055   | 442                      |
| PARP11             | ENST00000453942   | chr12             | 3982073      | 3982074    | 442                      |
| NCAPH2             | ENST00000520939   | chr22             | 50947149     | 50947150   | 445                      |
| RP11-793H13.4      | ENST00000546894   | chr12             | 53902491     | 53902492   | 446                      |
| IQCD               | ENST00000546692   | chr12             | 113658384    | 113658385  | 447                      |
| LRFN3              | ENST00000587257   | chr19             | 36427041     | 36427042   | 448                      |
| CLK2               | ENST00000361168   | chr1              | 155242628    | 155242629  | 449                      |
| CAV2               | ENST00000495841   | chr7              | 116140550    | 116140551  | 454                      |
| FGD5-AS1           | ENST00000440079   | chr3              | 14988555     | 14988556   | 456                      |
| CTD-2201E18.3      | ENST00000503152   | chr5              | 43067064     | 43067065   | 456                      |
| MCM3               | ENST00000419835   | chr6              | 52149046     | 52149047   | 458                      |
| TCTEX1D2           | ENST00000426563   | chr3              | 196044622    | 196044623  | 462                      |
| ID3                | ENST00000463312   | chr1              | 23885100     | 23885101   | 465                      |
| LTN1               | ENST00000389194   | chr21             | 30364804     | 30364805   | 465                      |
| HIST1H2BC          | ENST00000314332   | chr6              | 26123688     | 26123689   | 465                      |
| DIAPH3             | ENST00000400319   | chr13             | 60737432     | 60737433   | 467                      |
| FBL                | ENST00000599134   | chr19             | 40336501     | 40336502   | 467                      |
| SKA3               | ENST00000475251   | chr13             | 21750143     | 21750144   | 468                      |
| CASP8AP2           | ENST00000548224   | chr6              | 90540131     | 90540132   | 473                      |
| SMAD9-AS1          | ENST00000437983   | chr13             | 37423975     | 37423976   | 474                      |
| SNORA43            | ENST00000516652   | chr16             | 28892453     | 28892454   | 474                      |
| ZNF180             | ENST00000592095   | chr19             | 45004072     | 45004073   | 474                      |
| PMVK               | ENST00000368467   | chr1              | 154908991    | 154908992  | 475                      |
| FBXO4              | ENST00000506496   | chr5              | 41925897     | 41925898   | 476                      |
| IDO2               | ENST00000502986   | chr8              | 39792951     | 39792952   | 479                      |
| FANCI              | ENST00000566895   | chr15             | 89822391     | 89822392   | 482                      |
| SUGP1              | ENST00000588731   | chr19             | 19430816     | 19430817   | 484                      |
| RP4-564F22.2       | ENST00000414142   | chr20             | 37063429     | 37063430   | 486                      |
| RP11-96D1.6        | ENST00000564147   | chr16             | 68271080     | 68271081   | 489                      |
| G3BP2              | ENST00000507745   | chr4              | 76597375     | 76597376   | 489                      |

**Supplemental Table 2: Genes with significant occupancy of E2F8 at the promoter regions (-5kb to+2kb)**

| <b>Gene Symbol</b> | <b>Ensembl ID</b> | <b>Chromosome</b> | <b>Start</b> | <b>End</b> | <b>distance from TSS</b> |
|--------------------|-------------------|-------------------|--------------|------------|--------------------------|
| MTCH1              | ENST00000373550   | chr6              | 36953267     | 36953268   | 489                      |
| PLXDC1             | ENST00000579190   | chr17             | 37310156     | 37310157   | 490                      |
| PHF8               | ENST00000448003   | chrX              | 54028612     | 54028613   | 490                      |
| MASTL              | ENST00000375940   | chr10             | 27444788     | 27444789   | 491                      |
| CNTRL              | ENST00000373855   | chr9              | 123837779    | 123837780  | 491                      |
| FOXK2              | ENST00000570585   | chr17             | 80478660     | 80478661   | 492                      |
| MRPL53             | ENST00000467349   | chr2              | 74699181     | 74699182   | 492                      |
| BUD13              | ENST00000375445   | chr11             | 116643209    | 116643210  | 493                      |
| C12orf57           | ENST00000540506   | chr12             | 7053780      | 7053781    | 493                      |
| OPA3               | ENST00000263275   | chr19             | 46087583     | 46087584   | 493                      |
| IMPA2              | ENST00000588927   | chr18             | 11982161     | 11982162   | 494                      |
| C1ORF220           | ENST00000367636   | chr1              | 178512447    | 178512448  | 499                      |
| PALLD              | ENST00000512127   | chr4              | 169553266    | 169553267  | 500                      |
| KHDC1              | ENST00000484801   | chr6              | 74019365     | 74019366   | 500                      |
| DLGAP3             | ENST00000495979   | chr1              | 35390593     | 35390594   | 501                      |
| B3GAT3             | ENST00000532585   | chr11             | 62388951     | 62388952   | 504                      |
| UNC13A             | ENST00000523229   | chr19             | 17722464     | 17722465   | 504                      |
| RP13-507I23.1      | ENST00000444489   | chrX              | 149108876    | 149108877  | 504                      |
| STK35              | ENST00000246032   | chr20             | 2083031      | 2083032    | 505                      |
| BIN3               | ENST00000519335   | chr8              | 22526086     | 22526087   | 505                      |
| UNG                | ENST00000446767   | chr12             | 109536460    | 109536461  | 506                      |
| TCOF1              | ENST00000515516   | chr5              | 149737850    | 149737851  | 506                      |
| SUV39H1            | ENST00000453214   | chrX              | 48555653     | 48555654   | 506                      |
| REL                | ENST00000394479   | chr2              | 61109296     | 61109297   | 507                      |
| SHCBP1             | ENST00000564272   | chr16             | 46654750     | 46654751   | 512                      |
| SPPL2A             | ENST00000560288   | chr15             | 51057392     | 51057393   | 513                      |
| PAN3               | ENST00000399613   | chr13             | 28713683     | 28713684   | 515                      |
| CLDN7              | ENST00000574070   | chr17             | 7163948      | 7163949    | 515                      |
| CLCC1              | ENST00000369976   | chr1              | 109505555    | 109505556  | 516                      |
| FASTK              | ENST00000483953   | chr7              | 150775480    | 150775481  | 517                      |
| TOP3A              | ENST00000580095   | chr17             | 18217495     | 18217496   | 521                      |
| MYNN               | ENST00000356716   | chr3              | 169491374    | 169491375  | 523                      |
| ST13P12            | ENST00000508958   | chr5              | 82265228     | 82265229   | 523                      |
| FAM105B            | ENST00000284274   | chr5              | 14665379     | 14665380   | 524                      |
| PARP1              | ENST00000366790   | chr1              | 226595157    | 226595158  | 525                      |
| POLD3              | ENST00000530511   | chr11             | 74304212     | 74304213   | 525                      |
| DBR1               | ENST00000477557   | chr3              | 137893174    | 137893175  | 526                      |
| ZNF791             | ENST00000498389   | chr19             | 12722297     | 12722298   | 527                      |
| RAP1A              | ENST00000545460   | chr1              | 112163296    | 112163297  | 529                      |
| RAVER1             | ENST00000591969   | chr19             | 10443637     | 10443638   | 529                      |

**Supplemental Table 2: Genes with significant occupancy of E2F8 at the promoter regions (-5kb to+2kb)**

| Gene Symbol  | Ensembl ID      | Chromosome | Start     | End       | distance from TSS |
|--------------|-----------------|------------|-----------|-----------|-------------------|
| NUP35        | ENST00000452137 | chr2       | 183989714 | 183989715 | 530               |
| AGPAT4       | ENST00000437165 | chr6       | 161569790 | 161569791 | 530               |
| LINC00473    | ENST00000581850 | chr6       | 166400871 | 166400872 | 530               |
| CAD          | ENST00000403525 | chr2       | 27440805  | 27440806  | 531               |
| RTN3         | ENST00000354497 | chr11      | 63449575  | 63449576  | 532               |
| ITM2B        | ENST00000378549 | chr13      | 48807869  | 48807870  | 532               |
| UGGT2        | ENST00000376747 | chr13      | 96705104  | 96705105  | 532               |
| ENAH         | ENST00000284563 | chr1       | 225839882 | 225839883 | 535               |
| RFC5         | ENST00000535092 | chr12      | 118455068 | 118455069 | 536               |
| ACIN1        | ENST00000473758 | chr14      | 23538197  | 23538198  | 536               |
| NFKB1        | ENST00000505458 | chr4       | 103423589 | 103423590 | 536               |
| FAIM         | ENST00000393034 | chr3       | 138328450 | 138328451 | 538               |
| MLLT11       | ENST00000368921 | chr1       | 151030771 | 151030772 | 539               |
| KRCC1        | ENST00000347055 | chr2       | 88354708  | 88354709  | 539               |
| LINC00441    | ENST00000436963 | chr13      | 48877254  | 48877255  | 540               |
| KIAA0240     | ENST00000394167 | chr6       | 42715234  | 42715235  | 540               |
| MALSU1       | ENST00000481564 | chr7       | 23339499  | 23339500  | 541               |
| RPA3         | ENST00000401447 | chr7       | 7679112   | 7679113   | 544               |
| IGBP1        | ENST00000356413 | chrX       | 69353855  | 69353856  | 544               |
| POLR1D       | ENST00000302979 | chr13      | 28195447  | 28195448  | 546               |
| RMI2         | ENST00000576027 | chr16      | 11439853  | 11439854  | 548               |
| CEP57        | ENST00000538658 | chr11      | 95524371  | 95524372  | 550               |
| DNMT1        | ENST00000592054 | chr19      | 10304747  | 10304748  | 554               |
| PPM1G        | ENST00000472077 | chr2       | 27631866  | 27631867  | 555               |
| FICD         | ENST00000361549 | chr12      | 108909648 | 108909649 | 557               |
| FUCA2        | ENST00000438118 | chr6       | 143832241 | 143832242 | 557               |
| PATL1        | ENST00000300146 | chr11      | 59435893  | 59435894  | 559               |
| FLII         | ENST00000579294 | chr17      | 18161310  | 18161311  | 559               |
| PRR5L        | ENST00000530627 | chr11      | 36477397  | 36477398  | 560               |
| NAMPT        | ENST00000484527 | chr7       | 105924517 | 105924518 | 560               |
| RP4-675G8.4  | ENST00000423265 | chr1       | 44620411  | 44620412  | 561               |
| DENND5A      | ENST00000530044 | chr11      | 9286072   | 9286073   | 561               |
| RP11-796E2.4 | ENST00000499685 | chr12      | 92540517  | 92540518  | 562               |
| PARP14       | ENST00000494811 | chr3       | 122400266 | 122400267 | 562               |
| C17orf64     | ENST00000428000 | chr17      | 58470488  | 58470489  | 563               |
| CAND1        | ENST00000540525 | chr12      | 67664243  | 67664244  | 564               |
| VAT1         | ENST00000587173 | chr17      | 41173807  | 41173808  | 565               |
| TRPV4        | ENST00000537083 | chr12      | 110252033 | 110252034 | 567               |
| ARL8B        | ENST00000419534 | chr3       | 5164547   | 5164548   | 568               |
| UCHL3        | ENST00000377595 | chr13      | 76124494  | 76124495  | 569               |

**Supplemental Table 2: Genes with significant occupancy of E2F8 at the promoter regions (-5kb to+2kb)**

| <b>Gene Symbol</b> | <b>Ensembl ID</b> | <b>Chromosome</b> | <b>Start</b> | <b>End</b> | <b>distance from TSS</b> |
|--------------------|-------------------|-------------------|--------------|------------|--------------------------|
| TADA3              | ENST00000492635   | chr3              | 9833522      | 9833523    | 569                      |
| SART3              | ENST00000431469   | chr12             | 108954364    | 108954365  | 570                      |
| UQCC               | ENST00000496812   | chr20             | 33894287     | 33894288   | 570                      |
| NUP153             | ENST00000262077   | chr6              | 17706045     | 17706046   | 572                      |
| JTB                | ENST00000428469   | chr1              | 153949296    | 153949297  | 573                      |
| USP21              | ENST00000487163   | chr1              | 161131724    | 161131725  | 573                      |
| EFHC1              | ENST00000433625   | chr6              | 52285738     | 52285739   | 575                      |
| QTRTD1             | ENST00000462966   | chr3              | 113802194    | 113802195  | 580                      |
| GALNT1             | ENST00000590654   | chr18             | 33235199     | 33235200   | 581                      |
| COMMD4             | ENST00000568301   | chr15             | 75629029     | 75629030   | 585                      |
| OXR1               | ENST00000438229   | chr8              | 107670702    | 107670703  | 585                      |
| NDUFA8             | ENST00000537618   | chr9              | 124921480    | 124921481  | 585                      |
| SUMO1              | ENST00000409205   | chr2              | 203102594    | 203102595  | 590                      |
| SST                | ENST00000287641   | chr3              | 187387596    | 187387597  | 590                      |
| HEXIM1             | ENST00000332499   | chr17             | 43225273     | 43225274   | 591                      |
| DAPK2              | ENST00000559306   | chr15             | 64363638     | 64363639   | 593                      |
| RELT               | ENST00000393580   | chr11             | 73088309     | 73088310   | 598                      |
| CBX5               | ENST00000209875   | chr12             | 54673285     | 54673286   | 600                      |
| CTD-3252C9.2       | ENST00000591242   | chr19             | 13907146     | 13907147   | 600                      |
| AEN                | ENST00000558327   | chr15             | 89165215     | 89165216   | 605                      |
| IER2               | ENST00000588173   | chr19             | 13263394     | 13263395   | 607                      |
| UBA52P9            | ENST00000483523   | chr18             | 24935116     | 24935117   | 611                      |
| SESTD1             | ENST00000435047   | chr2              | 180128316    | 180128317  | 613                      |
| POLR2A             | ENST00000572844   | chr17             | 7388551      | 7388552    | 614                      |
| DSN1               | ENST00000373740   | chr20             | 35401501     | 35401502   | 621                      |
| PANK2              | ENST00000336066   | chr20             | 3870660      | 3870661    | 626                      |
| SNX8               | ENST00000494722   | chr7              | 2353448      | 2353449    | 627                      |
| MSH2               | ENST00000406134   | chr2              | 47630899     | 47630900   | 632                      |
| SNRPB              | ENST00000474384   | chr20             | 2450742      | 2450743    | 635                      |
| HIST1H4I           | ENST00000354348   | chr6              | 27107709     | 27107710   | 635                      |
| CHRAC1             | ENST00000519618   | chr8              | 141522718    | 141522719  | 639                      |
| PEA15              | ENST00000368076   | chr1              | 160175851    | 160175852  | 642                      |
| HYDIN              | ENST00000543639   | chr16             | 71113643     | 71113644   | 645                      |
| PHF12              | ENST00000582853   | chr17             | 27276229     | 27276230   | 645                      |
| DHX15              | ENST00000511553   | chr4              | 24585258     | 24585259   | 646                      |
| MUL1               | ENST00000264198   | chr1              | 20834004     | 20834005   | 649                      |
| RIF1               | ENST00000430328   | chr2              | 152267254    | 152267255  | 652                      |
| HNRNPA2B1          | ENST00000354667   | chr7              | 26239712     | 26239713   | 653                      |
| SRSF10             | ENST00000495785   | chr1              | 24306106     | 24306107   | 654                      |
| RP11-736110.2      | ENST00000528891   | chr11             | 59845475     | 59845476   | 654                      |

**Supplemental Table 2: Genes with significant occupancy of E2F8 at the promoter regions (-5kb to+2kb)**

| <b>Gene Symbol</b> | <b>Ensembl ID</b> | <b>Chromosome</b> | <b>Start</b> | <b>End</b> | <b>distance from TSS</b> |
|--------------------|-------------------|-------------------|--------------|------------|--------------------------|
| SAMD9              | ENST00000446617   | chr7              | 92746620     | 92746621   | 654                      |
| HIST1H2BK          | ENST00000356950   | chr6              | 27113921     | 27113922   | 655                      |
| ISCU               | ENST00000535405   | chr12             | 108957047    | 108957048  | 656                      |
| CCDC19             | ENST00000475911   | chr1              | 159849828    | 159849829  | 661                      |
| ANKRD11            | ENST00000562275   | chr16             | 89382820     | 89382821   | 662                      |
| MCM6               | ENST00000264156   | chr2              | 136633329    | 136633330  | 666                      |
| NEK4               | ENST00000535191   | chr3              | 52804205     | 52804206   | 666                      |
| RP11-715J22.2      | ENST00000563775   | chr16             | 2517544      | 2517545    | 669                      |
| ZNF263             | ENST00000575823   | chr16             | 3334622      | 3334623    | 669                      |
| POLD1              | ENST00000593887   | chr19             | 50888298     | 50888299   | 670                      |
| E2F1               | ENST00000343380   | chr20             | 32273538     | 32273539   | 671                      |
| PSMC1              | ENST00000543772   | chr14             | 90723595     | 90723596   | 675                      |
| CFDP1              | ENST00000566254   | chr16             | 75466610     | 75466611   | 678                      |
| CTD-2616J11.14     | ENST00000600765   | chr19             | 51898421     | 51898422   | 681                      |
| CELF4              | ENST00000586009   | chr18             | 34850196     | 34850197   | 686                      |
| KITLG              | ENST00000228280   | chr12             | 88973548     | 88973549   | 689                      |
| CC2D1B             | ENST00000491136   | chr1              | 52831136     | 52831137   | 691                      |
| INPP4A             | ENST00000409540   | chr2              | 99062102     | 99062103   | 691                      |
| SRD5A1             | ENST00000538824   | chr5              | 6634275      | 6634276    | 696                      |
| NPAS4              | ENST00000525148   | chr11             | 66189258     | 66189259   | 698                      |
| PREB               | ENST00000406567   | chr2              | 27356780     | 27356781   | 699                      |
| HIATL1             | ENST00000375344   | chr9              | 97137536     | 97137537   | 705                      |
| CHIC2              | ENST00000510894   | chr4              | 54929757     | 54929758   | 707                      |
| ZFYVE16            | ENST00000512442   | chr5              | 79704640     | 79704641   | 708                      |
| RP11-443B7.3       | ENST00000549744   | chr1              | 235115841    | 235115842  | 709                      |
| USP37              | ENST00000418019   | chr2              | 219432303    | 219432304  | 710                      |
| EIF1AX             | ENST00000379593   | chrX              | 20159230     | 20159231   | 713                      |
| IRF9               | ENST00000560852   | chr14             | 24631238     | 24631239   | 714                      |
| FBXO11             | ENST00000424163   | chr2              | 48131634     | 48131635   | 714                      |
| NIM1               | ENST00000512796   | chr5              | 43193667     | 43193668   | 715                      |
| HIST1H2BG          | ENST00000244601   | chr6              | 26216156     | 26216157   | 715                      |
| RP11-651L5.2       | ENST00000552486   | chr12             | 106640016    | 106640017  | 717                      |
| SIRT5              | ENST00000379250   | chr6              | 13575590     | 13575591   | 717                      |
| TAF3               | ENST00000344293   | chr10             | 7861184      | 7861185    | 719                      |
| IKBIP              | ENST00000420861   | chr12             | 99038012     | 99038013   | 719                      |
| SLC16A6            | ENST00000327268   | chr17             | 66286533     | 66286534   | 723                      |
| HIST1H4B           | ENST00000377364   | chr6              | 26026755     | 26026756   | 724                      |
| ASGR2              | ENST00000446679   | chr17             | 7016832      | 7016833    | 726                      |
| PPRC1              | ENST00000413464   | chr10             | 103893526    | 103893527  | 731                      |
| DIDO1              | ENST00000266070   | chr20             | 61568541     | 61568542   | 732                      |

**Supplemental Table 2: Genes with significant occupancy of E2F8 at the promoter regions (-5kb to+2kb)**

| Gene Symbol   | Ensembl ID            | Chromosome | Start     | End       | distance from TSS |
|---------------|-----------------------|------------|-----------|-----------|-------------------|
| FANCE         | ENST00000229769       | chr6       | 35420868  | 35420869  | 732               |
| RNU1-1        | ENST00000383925       | chr1       | 16840046  | 16840047  | 733               |
| WDR82         | ENST00000469000       | chr3       | 52311603  | 52311604  | 733               |
| SGPL1         | ENST00000373202       | chr10      | 72576463  | 72576464  | 739               |
| PHLDB2        | ENST00000393925       | chr3       | 111579380 | 111579381 | 739               |
| SNORA76       | ENST00000408535       | chr17      | 62224437  | 62224438  | 740               |
| POGZ          | ENST00000358476       | chr1       | 151430908 | 151430909 | 745               |
| RFX3          | ENST00000382004       | chr9       | 3525237   | 3525238   | 745               |
| RP4-724E13.2  | ENST00000582616       | chr7       | 51085908  | 51085909  | 750               |
| HIST1H1PS1    | ENST00000404269       | chr6       | 26196545  | 26196546  | 753               |
|               | 1-Mar ENST00000366910 | chr1       | 220960853 | 220960854 | 754               |
| RP11-65J3.1   | ENST00000436710       | chr9       | 132096937 | 132096938 | 754               |
| AC009948.5    | ENST00000415236       | chr2       | 179279503 | 179279504 | 755               |
| HNRNPA1       | ENST00000551803       | chr12      | 54680491  | 54680492  | 762               |
| PTPN12        | ENST00000435495       | chr7       | 77168149  | 77168150  | 765               |
| HMBS          | ENST00000539045       | chr11      | 118964087 | 118964088 | 768               |
| RP5-1021I20.4 | ENST00000556551       | chr14      | 74319442  | 74319443  | 770               |
| RABIF         | ENST00000367262       | chr1       | 202857487 | 202857488 | 775               |
| MAP3K4        | ENST00000490904       | chr6       | 161413650 | 161413651 | 776               |
| RNF138        | ENST00000580499       | chr18      | 29673441  | 29673442  | 778               |
| ZCCHC11       | ENST00000257177       | chr1       | 53017874  | 53017875  | 779               |
| NCAPD3        | ENST00000533155       | chr11      | 134093055 | 134093056 | 779               |
| ELF2          | ENST00000379549       | chr4       | 140004560 | 140004561 | 783               |
| TFAP2A        | ENST00000461628       | chr6       | 10404033  | 10404034  | 793               |
| CENPM         | ENST00000404067       | chr22      | 42341896  | 42341897  | 795               |
| GCA           | ENST00000233612       | chr2       | 163201642 | 163201643 | 796               |
| RP1-90J20.7   | ENST00000597787       | chr6       | 2989728   | 2989729   | 797               |
| CD2AP         | ENST00000359314       | chr6       | 47446321  | 47446322  | 798               |
| RP11-191N8.2  | ENST00000431729       | chr1       | 222013204 | 222013205 | 803               |
| FBXL20        | ENST00000394294       | chr17      | 37557067  | 37557068  | 808               |
| DDX39A        | ENST00000590239       | chr19      | 14529064  | 14529065  | 809               |
| NFIA          | ENST00000407417       | chr1       | 61543758  | 61543759  | 814               |
| RNU1-5        | ENST00000384010       | chr1       | 149223403 | 149223404 | 817               |
| IDH3B         | ENST00000466999       | chr20      | 2639742   | 2639743   | 819               |
| CPEB3         | ENST00000394210       | chr10      | 94050016  | 94050017  | 827               |
| AC016700.5    | ENST00000414141       | chr2       | 70351620  | 70351621  | 828               |
| RNU1-2        | ENST00000384278       | chr1       | 17223302  | 17223303  | 829               |
| RP11-323I15.2 | ENST00000558778       | chr15      | 35385513  | 35385514  | 833               |
| BX470102.3    | ENST00000420695       | chr1       | 153506911 | 153506912 | 834               |
| CDC25A        | ENST00000443342       | chr3       | 48228619  | 48228620  | 836               |

**Supplemental Table 2: Genes with significant occupancy of E2F8 at the promoter regions (-5kb to+2kb)**

| <b>Gene Symbol</b> | <b>Ensembl ID</b> | <b>Chromosome</b> | <b>Start</b> | <b>End</b> | <b>distance from TSS</b> |
|--------------------|-------------------|-------------------|--------------|------------|--------------------------|
| AC093887.1         | ENST00000584185   | chr4              | 147561247    | 147561248  | 836                      |
| FADD               | ENST00000301838   | chr11             | 70050105     | 70050106   | 838                      |
| U2AF2              | ENST00000587196   | chr19             | 56167311     | 56167312   | 838                      |
| LUC7L2             | ENST00000456182   | chr7              | 139045497    | 139045498  | 841                      |
| RP11-773H22.4      | ENST00000588211   | chr18             | 12990329     | 12990330   | 842                      |
| MAPRE1             | ENST00000375571   | chr20             | 31408539     | 31408540   | 842                      |
| U8                 | ENST00000459095   | chr10             | 5003914      | 5003915    | 845                      |
| AC009892.2         | ENST00000433549   | chr19             | 55064099     | 55064100   | 848                      |
| CSRNP1             | ENST00000273153   | chr3              | 39194214     | 39194215   | 851                      |
| SERP1              | ENST00000491660   | chr3              | 150263434    | 150263435  | 851                      |
| MB21D1             | ENST00000370318   | chr6              | 74161130     | 74161131   | 851                      |
| TMEM38B            | ENST00000374692   | chr9              | 108457675    | 108457676  | 852                      |
| CTD-2296D1.4       | ENST00000513219   | chr5              | 7372332      | 7372333    | 854                      |
| MAP4               | ENST00000439356   | chr3              | 48129458     | 48129459   | 855                      |
| B4GALT5            | ENST00000371711   | chr20             | 48329553     | 48329554   | 861                      |
| PDZD2              | ENST00000502489   | chr5              | 31855902     | 31855903   | 861                      |
| RNF169             | ENST00000299563   | chr11             | 74460777     | 74460778   | 866                      |
| RP11-973N13.4      | ENST00000554918   | chr14             | 65006217     | 65006218   | 868                      |
| EIF4A3             | ENST00000576547   | chr17             | 78120065     | 78120066   | 872                      |
| ALMS1              | ENST00000264448   | chr2              | 73613760     | 73613761   | 876                      |
| CNBP               | ENST00000502372   | chr3              | 128901829    | 128901830  | 877                      |
| STAT5B             | ENST00000293328   | chr17             | 40427545     | 40427546   | 878                      |
| CDC37              | ENST00000588869   | chr19             | 10513307     | 10513308   | 879                      |
| PCNA               | ENST00000379143   | chr20             | 5099791      | 5099792    | 880                      |
| NPL                | ENST00000367554   | chr1              | 182759797    | 182759798  | 888                      |
| RSPH3              | ENST00000449822   | chr6              | 159419924    | 159419925  | 888                      |
| SMURF1             | ENST00000361368   | chr7              | 98740749     | 98740750   | 892                      |
| FBXO5              | ENST00000229758   | chr6              | 153303251    | 153303252  | 901                      |
| KPNA6              | ENST00000537234   | chr1              | 32574793     | 32574794   | 906                      |
| CENPV              | ENST00000584214   | chr17             | 16255850     | 16255851   | 908                      |
| HSBP1L1            | ENST00000589516   | chr18             | 77725536     | 77725537   | 908                      |
| TRIP12             | ENST00000487178   | chr2              | 230669951    | 230669952  | 913                      |
| CLDN3              | ENST00000395145   | chr7              | 73183684     | 73183685   | 915                      |
| PAN3               | ENST00000399613   | chr13             | 28714087     | 28714088   | 919                      |
| SGCA               | ENST00000504073   | chr17             | 48246803     | 48246804   | 922                      |
| FOXF2              | ENST00000259806   | chr6              | 1390989      | 1390990    | 922                      |
| MIR5000            | ENST00000577717   | chr2              | 75318860     | 75318861   | 923                      |
| ADAM17             | ENST00000478059   | chr2              | 9694973      | 9694974    | 929                      |
| CRYGB              | ENST00000260988   | chr2              | 209009960    | 209009961  | 931                      |
| MIR3687            | ENST00000577708   | chr21             | 9827143      | 9827144    | 942                      |

**Supplemental Table 2: Genes with significant occupancy of E2F8 at the promoter regions (-5kb to+2kb)**

| <b>Gene Symbol</b> | <b>Ensembl ID</b> | <b>Chromosome</b> | <b>Start</b> | <b>End</b> | <b>distance from TSS</b> |
|--------------------|-------------------|-------------------|--------------|------------|--------------------------|
| NPM1               | ENST00000518587   | chr5              | 170815830    | 170815831  | 943                      |
| PHLDA3             | ENST00000485436   | chr1              | 201436761    | 201436762  | 947                      |
| GORASP2            | ENST00000497928   | chr2              | 171786916    | 171786917  | 975                      |
| E2F2               | ENST00000361729   | chr1              | 23856734     | 23856735   | 977                      |
| MIR181A2HG         | ENST00000429139   | chr9              | 127421724    | 127421725  | 980                      |
| GREB1L             | ENST00000269218   | chr18             | 18823299     | 18823300   | 982                      |
| Metazoa_SRP        | ENST00000581811   | chr1              | 150540759    | 150540760  | 985                      |
| RNU5A-8P           | ENST00000364102   | chr1              | 210546625    | 210546626  | 985                      |
| AL732363.1         | ENST00000581702   | chr1              | 149035389    | 149035390  | 987                      |
| GNAI2              | ENST00000446079   | chr3              | 50265156     | 50265157   | 989                      |
| NASP               | ENST00000351223   | chr1              | 46050733     | 46050734   | 998                      |
| IMP3               | ENST00000403490   | chr15             | 75931547     | 75931548   | 1004                     |
| UCK2               | ENST00000372212   | chr1              | 165798067    | 165798068  | 1010                     |
| ZNF837             | ENST00000427624   | chr19             | 58891377     | 58891378   | 1011                     |
| GTF2A1             | ENST00000553612   | chr14             | 81686250     | 81686251   | 1015                     |
| DNAAF1             | ENST00000564928   | chr16             | 84210763     | 84210764   | 1018                     |
| ASB3               | ENST00000470916   | chr2              | 54012961     | 54012962   | 1024                     |
| RP11-7C6.1         | ENST00000443282   | chr10             | 14695765     | 14695766   | 1026                     |
| ARHGAP42           | ENST00000531183   | chr11             | 100785259    | 100785260  | 1030                     |
| FRG2C              | ENST00000464571   | chr3              | 75714509     | 75714510   | 1030                     |
| HMBS               | ENST00000539045   | chr11             | 118964353    | 118964354  | 1034                     |
| QSER1              | ENST00000527250   | chr11             | 32915845     | 32915846   | 1041                     |
| CTD-2587H24.1      | ENST00000587647   | chr19             | 55630708     | 55630709   | 1042                     |
| TNFRSF1A           | ENST00000366159   | chr12             | 6449962      | 6449963    | 1051                     |
| BMF                | ENST00000220446   | chr15             | 40397232     | 40397233   | 1054                     |
| NEAT1              | ENST00000601801   | chr11             | 65191345     | 65191346   | 1061                     |
| RGMA               | ENST00000555584   | chr15             | 93605236     | 93605237   | 1061                     |
| RNF167             | ENST00000574548   | chr17             | 4848737      | 4848738    | 1064                     |
| LMNB1              | ENST00000463908   | chr5              | 126114145    | 126114146  | 1076                     |
| POU4F1             | ENST00000377208   | chr13             | 79176594     | 79176595   | 1078                     |
| ZNF263             | ENST00000538765   | chr16             | 3314877      | 3314878    | 1079                     |
| SNORA76            | ENST00000408535   | chr17             | 62224780     | 62224781   | 1083                     |
| 7SK                | ENST00000410325   | chr4              | 45998234     | 45998235   | 1100                     |
| TMOD3              | ENST00000560549   | chr15             | 52168325     | 52168326   | 1104                     |
| HIST1H2BO          | ENST00000303806   | chr6              | 27862310     | 27862311   | 1109                     |
| CMIP               | ENST00000537098   | chr16             | 81479883     | 81479884   | 1110                     |
| WNT2B              | ENST00000478360   | chr1              | 113058487    | 113058488  | 1115                     |
| IGFL1P1            | ENST00000599950   | chr19             | 46700615     | 46700616   | 1122                     |
| JUND               | ENST00000600972   | chr19             | 18390614     | 18390615   | 1124                     |
| SKIDA1             | ENST00000444772   | chr10             | 21805715     | 21805716   | 1132                     |



**Supplemental Table 2: Genes with significant occupancy of E2F8 at the promoter regions (-5kb to+2kb)**

| <b>Gene Symbol</b> | <b>Ensembl ID</b> | <b>Chromosome</b> | <b>Start</b> | <b>End</b> | <b>distance from TSS</b> |
|--------------------|-------------------|-------------------|--------------|------------|--------------------------|
| EME1               | ENST00000507616   | chr17             | 48458252     | 48458253   | 1134                     |
| CTD-2049J23.3      | ENST00000471921   | chr3              | 159745581    | 159745582  | 1135                     |
| LUC7L2             | ENST00000456182   | chr7              | 139045803    | 139045804  | 1147                     |
| NLRC5              | ENST00000543402   | chr16             | 57094262     | 57094263   | 1152                     |
| UBE2D3             | ENST00000508238   | chr4              | 103788863    | 103788864  | 1154                     |
| MAP3K19            | ENST00000486077   | chr2              | 135803852    | 135803853  | 1160                     |
| ELF2               | ENST00000379549   | chr4              | 140004177    | 140004178  | 1166                     |
| HMGN5              | ENST00000373250   | chrX              | 80375970     | 80375971   | 1166                     |
| RPL7A              | ENST00000492798   | chr9              | 136218871    | 136218872  | 1168                     |
| GATA6              | ENST00000581694   | chr18             | 19752072     | 19752073   | 1180                     |
| EIF2S2             | ENST00000374980   | chr20             | 32698957     | 32698958   | 1180                     |
| KCTD2              | ENST00000581589   | chr17             | 73029888     | 73029889   | 1183                     |
| USP1               | ENST00000339950   | chr1              | 62903509     | 62903510   | 1185                     |
| HSD17B12           | ENST00000533090   | chr11             | 43852799     | 43852800   | 1188                     |
| SYNCRIP            | ENST00000355238   | chr6              | 86351516     | 86351517   | 1192                     |
| HES1               | ENST00000476918   | chr3              | 193855130    | 193855131  | 1195                     |
| RP5-1157M23.2      | ENST00000464958   | chr3              | 52274514     | 52274515   | 1200                     |
| GMPS               | ENST00000541628   | chr3              | 155589700    | 155589701  | 1202                     |
| HIST2H2BE          | ENST00000369155   | chr1              | 149857025    | 149857026  | 1206                     |
| WHSC1              | ENST00000514045   | chr4              | 1874393      | 1874394    | 1207                     |
| BBC3               | ENST00000439096   | chr19             | 47733237     | 47733238   | 1213                     |
| FLG-AS1            | ENST00000420707   | chr1              | 152163051    | 152163052  | 1226                     |
| AGGF1P3            | ENST00000493675   | chr3              | 75702697     | 75702698   | 1226                     |
| ABI2               | ENST00000454023   | chr2              | 204256993    | 204256994  | 1228                     |
| DUS2L              | ENST00000575677   | chr16             | 68029925     | 68029926   | 1238                     |
| TRIM24             | ENST00000494040   | chr7              | 138190277    | 138190278  | 1244                     |
| NAPA               | ENST00000597271   | chr19             | 47993486     | 47993487   | 1245                     |
| RNA45S5            | ENST00000445125   | chrY              | 10035465     | 10035466   | 1245                     |
| TRIM33             | ENST00000358465   | chr1              | 115052520    | 115052521  | 1260                     |
| TTC25              | ENST00000591658   | chr17             | 40088167     | 40088168   | 1260                     |
| ZCCHC11            | ENST00000257177   | chr1              | 53017388     | 53017389   | 1265                     |
| THNSL1             | ENST00000524413   | chr10             | 25306856     | 25306857   | 1271                     |
| LEPREL4            | ENST00000587455   | chr17             | 39966127     | 39966128   | 1284                     |
| CTC-344H19.4       | ENST00000601033   | chr19             | 46532410     | 46532411   | 1285                     |
| CD160              | ENST00000369288   | chr1              | 145714274    | 145714275  | 1290                     |
| RP4-535B20.1       | ENST00000448344   | chr1              | 65532128     | 65532129   | 1291                     |
| ZC3HAV1            | ENST00000464606   | chr7              | 138792801    | 138792802  | 1298                     |
| MSI2               | ENST00000584476   | chr17             | 55335784     | 55335785   | 1301                     |
| LINC00092          | ENST00000583864   | chr9              | 98788933     | 98788934   | 1308                     |
| SCARB2             | ENST00000502908   | chr4              | 77115685     | 77115686   | 1312                     |

**Supplemental Table 2: Genes with significant occupancy of E2F8 at the promoter regions (-5kb to+2kb)**

| Gene Symbol   | Ensembl ID            | Chromosome | Start     | End       | distance from TSS |
|---------------|-----------------------|------------|-----------|-----------|-------------------|
| RP5-1103G7.4  | ENST00000414676       | chr20      | 304545    | 304546    | 1332              |
| PRR9          | ENST00000368744       | chr1       | 153191401 | 153191402 | 1343              |
| U6            | ENST00000516731       | chr20      | 48412691  | 48412692  | 1345              |
| RP11-151G14.1 | ENST00000557286       | chr14      | 89576220  | 89576221  | 1346              |
| DIEXF         | ENST00000457820       | chr1       | 210013506 | 210013507 | 1358              |
| LRP8          | ENST00000465675       | chr1       | 53791708  | 53791709  | 1362              |
| CTD-2659N19.9 | ENST00000590065       | chr19      | 12894545  | 12894546  | 1369              |
| RNA5SP42      | ENST00000364278       | chr1       | 34579922  | 34579923  | 1374              |
| ZNF367        | ENST00000375256       | chr9       | 99179235  | 99179236  | 1375              |
| HIST1H2AG     | ENST00000359193       | chr6       | 27102210  | 27102211  | 1380              |
| RHOF          | ENST00000537265       | chr12      | 122229873 | 122229874 | 1392              |
| GADD45GIP1    | ENST00000316939       | chr19      | 13066657  | 13066658  | 1392              |
| TNFSF9        | ENST00000245817       | chr19      | 6532415   | 6532416   | 1407              |
| MRPL41        | ENST00000371443       | chr9       | 140447065 | 140447066 | 1416              |
| TRIM41        | ENST00000510072       | chr5       | 180662122 | 180662123 | 1418              |
| LRCH1         | ENST00000389797       | chr13      | 47128814  | 47128815  | 1421              |
| SIPA1L3       | ENST00000595384       | chr19      | 38592044  | 38592045  | 1424              |
| LINC00273     | ENST00000567668       | chr16      | 33955684  | 33955685  | 1430              |
| TPM4          | ENST00000588410       | chr19      | 16189262  | 16189263  | 1433              |
| IDE           | ENST00000478361       | chr10      | 94332380  | 94332381  | 1443              |
| C3AR1         | ENST00000546241       | chr12      | 8217483   | 8217484   | 1449              |
| CDKN1A        | ENST00000462537       | chr6       | 36647997  | 36647998  | 1451              |
| ITGAX         | ENST00000562138       | chr16      | 31384253  | 31384254  | 1460              |
| SURF1         | ENST00000495952       | chr9       | 136219642 | 136219643 | 1465              |
| FAM24A        | ENST00000368894       | chr10      | 124671689 | 124671690 | 1474              |
| NLGN3         | ENST00000358741       | chrX       | 70366185  | 70366186  | 1475              |
| GDPD4         | ENST00000527489       | chr11      | 77011213  | 77011214  | 1480              |
| RGPD1         | ENST00000398193       | chr2       | 87142417  | 87142418  | 1484              |
| DLGAP1        | ENST00000485480       | chr18      | 3741028   | 3741029   | 1486              |
|               | 7-Sep ENST00000537785 | chr7       | 35842317  | 35842318  | 1490              |
| RP11-540O11.7 | ENST00000558101       | chr15      | 41305284  | 41305285  | 1491              |
| ERVH48-1      | ENST00000447535       | chr21      | 44344264  | 44344265  | 1491              |
| CTD-2296D1.4  | ENST00000513219       | chr5       | 7371678   | 7371679   | 1508              |
| MOCOS         | ENST00000261326       | chr18      | 33769008  | 33769009  | 1528              |
| UNC13A        | ENST00000519716       | chr19      | 17797478  | 17797479  | 1529              |
| UBE2G2        | ENST00000496395       | chr21      | 46220123  | 46220124  | 1535              |
| TMEM14A       | ENST00000211314       | chr6       | 52537449  | 52537450  | 1544              |
| USP1          | ENST00000339950       | chr1       | 62903871  | 62903872  | 1547              |
| VCAN          | ENST00000502527       | chr5       | 82769298  | 82769299  | 1556              |
| JHDM1D        | ENST00000006967       | chr7       | 139875181 | 139875182 | 1559              |

**Supplemental Table 2: Genes with significant occupancy of E2F8 at the promoter regions (-5kb to+2kb)**

| <b>Gene Symbol</b> | <b>Ensembl ID</b> | <b>Chromosome</b> | <b>Start</b> | <b>End</b> | <b>distance from TSS</b> |
|--------------------|-------------------|-------------------|--------------|------------|--------------------------|
| RGCC               | ENST00000379359   | chr13             | 42033254     | 42033255   | 1561                     |
| NKD2               | ENST00000382730   | chr5              | 1038455      | 1038456    | 1562                     |
| PCNA               | ENST00000379143   | chr20             | 5099101      | 5099102    | 1570                     |
| MIR554             | ENST00000384874   | chr1              | 151519848    | 151519849  | 1578                     |
| ACTB               | ENST00000464611   | chr7              | 5566129      | 5566130    | 1599                     |
| CNN2P9             | ENST00000417134   | chr6              | 111181042    | 111181043  | 1602                     |
| ZNF697             | ENST00000421812   | chr1              | 120188777    | 120188778  | 1618                     |
| NR4A3              | ENST00000330847   | chr9              | 102590628    | 102590629  | 1621                     |
| SHC1               | ENST00000412170   | chr1              | 154945176    | 154945177  | 1635                     |
| PSMC3IP            | ENST00000587268   | chr17             | 40728051     | 40728052   | 1638                     |
| BAZ2A              | ENST00000549506   | chr12             | 57028460     | 57028461   | 1641                     |
| KIF25              | ENST00000496008   | chr6              | 168436317    | 168436318  | 1641                     |
| snoU13             | ENST00000459231   | chr2              | 70184417     | 70184418   | 1642                     |
| SEMA6A             | ENST00000513137   | chr5              | 115803589    | 115803590  | 1650                     |
| SNORD65            | ENST00000391079   | chr17             | 16346201     | 16346202   | 1663                     |
| RPS21P4            | ENST00000487122   | chr4              | 16256487     | 16256488   | 1690                     |
| STIM1              | ENST00000524822   | chr11             | 3911006      | 3911007    | 1691                     |
| IER5               | ENST00000367577   | chr1              | 181059329    | 181059330  | 1693                     |
| U6                 | ENST00000384376   | chrX              | 54371690     | 54371691   | 1713                     |
| RP11-44F14.2       | ENST00000565189   | chr16             | 53414087     | 53414088   | 1721                     |
| C1orf174           | ENST00000486765   | chr1              | 3815087      | 3815088    | 1723                     |
| FURIN              | ENST00000268171   | chr15             | 91413545     | 91413546   | 1725                     |
| RP11-443B7.3       | ENST00000549744   | chr1              | 235114801    | 235114802  | 1749                     |
| RP4-814E15.1       | ENST00000428811   | chr1              | 52716691     | 52716692   | 1753                     |
| RP5-968P14.2       | ENST00000569378   | chr1              | 27018860     | 27018861   | 1761                     |
| SKA3               | ENST00000475251   | chr13             | 21748845     | 21748846   | 1766                     |
| MIR5689            | ENST00000581998   | chr6              | 10441724     | 10441725   | 1776                     |
| LMNB1              | ENST00000463908   | chr5              | 126114854    | 126114855  | 1785                     |
| RP4-761J14.8       | ENST00000407384   | chr12             | 6774232      | 6774233    | 1808                     |
| BASP1              | ENST00000322611   | chr5              | 17219479     | 17219480   | 1812                     |
| PROB1              | ENST00000434752   | chr5              | 138729071    | 138729072  | 1813                     |
| LINC00265          | ENST00000340510   | chr7              | 39775042     | 39775043   | 1813                     |
| SNORA65            | ENST00000364432   | chr9              | 130209095    | 130209096  | 1813                     |
| TMEM173            | ENST00000502825   | chr5              | 138858856    | 138858857  | 1815                     |
| SFN                | ENST00000339276   | chr1              | 27191459     | 27191460   | 1828                     |
| U6                 | ENST00000517277   | chr1              | 11214243     | 11214244   | 1838                     |
| SLC7A10            | ENST00000590036   | chr19             | 33714862     | 33714863   | 1841                     |
| GALNT9             | ENST00000328957   | chr12             | 132903941    | 132903942  | 1847                     |
| AC010886.2         | ENST00000437380   | chr2              | 218560481    | 218560482  | 1865                     |
| AC006486.1         | ENST00000378108   | chr19             | 42748804     | 42748805   | 1879                     |

**Supplemental Table 2: Genes with significant occupancy of E2F8 at the promoter regions (-5kb to+2kb)**

| <b>Gene Symbol</b> | <b>Ensembl ID</b> | <b>Chromosome</b> | <b>Start</b> | <b>End</b> | <b>distance from TSS</b> |
|--------------------|-------------------|-------------------|--------------|------------|--------------------------|
| OSBPL9             | ENST00000533825   | chr1              | 52239631     | 52239632   | 1885                     |
| BBC3               | ENST00000439096   | chr19             | 47732558     | 47732559   | 1892                     |
| FSCN1              | ENST00000405801   | chr7              | 5636208      | 5636209    | 1893                     |
| HYDIN              | ENST00000546257   | chr16             | 70895177     | 70895178   | 1895                     |
| RP11-168O16.1      | ENST00000458003   | chr1              | 200994983    | 200994984  | 1896                     |
| AL022344.2         | ENST00000435210   | chr10             | 43158076     | 43158077   | 1902                     |
| SNORD35A           | ENST00000363389   | chr19             | 49996333     | 49996334   | 1903                     |
| MUC4               | ENST00000486425   | chr3              | 195494651    | 195494652  | 1907                     |
| COQ5               | ENST00000546838   | chr12             | 120952569    | 120952570  | 1917                     |
| U7                 | ENST00000516597   | chr9              | 34016401     | 34016402   | 1917                     |
| DHRS7B             | ENST00000579303   | chr17             | 21032193     | 21032194   | 1918                     |
| CAPN3              | ENST00000397163   | chr15             | 42653702     | 42653703   | 1919                     |
| MPDZ               | ENST00000542806   | chr9              | 13138122     | 13138123   | 1921                     |
| SLC22A4            | ENST00000491257   | chr5              | 131633043    | 131633044  | 1927                     |
| ASB3               | ENST00000470916   | chr2              | 54012046     | 54012047   | 1939                     |
| AC016700.3         | ENST00000457870   | chr2              | 70320174     | 70320175   | 1951                     |
| PERP               | ENST00000421351   | chr6              | 138426688    | 138426689  | 1959                     |
| KDM6B              | ENST00000570632   | chr17             | 7750191      | 7750192    | 1960                     |
| ANKRD44            | ENST00000473081   | chr2              | 197973593    | 197973594  | 1960                     |
| CTC-524C5.2        | ENST00000575890   | chr17             | 5334227      | 5334228    | 1968                     |
| AUTS2              | ENST00000403018   | chr7              | 69066563     | 69066564   | 1968                     |
| SKOR2              | ENST00000425639   | chr18             | 44773568     | 44773569   | 1985                     |
| ATP11C             | ENST00000370557   | chrX              | 139013239    | 139013240  | 1989                     |
| TRAPPC9            | ENST00000521700   | chr8              | 140816481    | 140816482  | 1994                     |
| FOXX1              | ENST00000328914   | chr7              | 4723936      | 4723937    | 1998                     |

**Supplemental Table 3: Functional annotation of genes bound by E2F7/8 in the promoter region**

| IPA Category | Chl P-seq | B-H P-value | Molecules                                                                                                                                                                                                                                                                                                                                                                                                                                                                                                                                                                                                                                                                                                                                                                                                                                                                                                                                                                                                                                                                                                                                                                                                                                                                                                                                                                                                                                                                                                                                                                                                                                                                                                                                                                                                                                                                                                                                                                                                                                                                                                                                                                                                                                                                                                                                                                                                                                                                                                                                                                                                                                                                                                                                                                                                                                       |
|--------------|-----------|-------------|-------------------------------------------------------------------------------------------------------------------------------------------------------------------------------------------------------------------------------------------------------------------------------------------------------------------------------------------------------------------------------------------------------------------------------------------------------------------------------------------------------------------------------------------------------------------------------------------------------------------------------------------------------------------------------------------------------------------------------------------------------------------------------------------------------------------------------------------------------------------------------------------------------------------------------------------------------------------------------------------------------------------------------------------------------------------------------------------------------------------------------------------------------------------------------------------------------------------------------------------------------------------------------------------------------------------------------------------------------------------------------------------------------------------------------------------------------------------------------------------------------------------------------------------------------------------------------------------------------------------------------------------------------------------------------------------------------------------------------------------------------------------------------------------------------------------------------------------------------------------------------------------------------------------------------------------------------------------------------------------------------------------------------------------------------------------------------------------------------------------------------------------------------------------------------------------------------------------------------------------------------------------------------------------------------------------------------------------------------------------------------------------------------------------------------------------------------------------------------------------------------------------------------------------------------------------------------------------------------------------------------------------------------------------------------------------------------------------------------------------------------------------------------------------------------------------------------------------------|
| Cancer       | E2F7      | 2.99E-10    | <p>VRK2,RNF219,RALGAPA2,ELF2,ALDOA,HNRNPL,CCNT2,ARGLU1,FAM212B,CDC6,CBX3,KHDC1, TOP2A,C1orf106,PMM1,FKBPL,SENP5,LEMD3,CDK5RAP2,SYDE1,DERL3,GBA,ANP32E,HAT1,MTAP,SETMAR,FBXO5,ZNF219,PMAIP1,RECQL,CYR61,PRIM2,EIF3B, SIK2,ORC1,RFC2,SIN3A,DSN1,EIF1AX,NASP,SNRPC,EGR1,GPR180,TRIM56,PARP1,DAXX,LUC7L2,RHEB,CDC23,TK1,C12orf57,RRM2,GINS3,CDKN2D,CDCA7,UNG,SLC25A25,GGCT,IGF2BP3,ADAM15,BRIP1,SUCO,GMPS,mir663,FBXL20,SMC1A,LIG1,FAM111B, FAM60A,SETX,ZNF524,MSH6,METTL2A,CEP85,E2F8,E2F2,HCN3,PNPLA8,SOX6,FCHSD2,SEMA6B,RNA45S5,CUEDC1,SRSF7,CD44,WEE1,FBXL3,SYNGR4,MMS22L,UCK2,NAP1L4,DUT,RPA3,FOXK2,POU2F1,FEN1,PANK2,ABC6,CLSPN,RAD51AP2,E2F3,TFAP4 ,LAGE3,RAB11B,Cxorf58,CFDP1,RAD54L,MCM10,ATAD5,PSMC3IP,LTN1,SLC12A4,RFC1,C19orf57,BRCA2,YEATS4,EXO1,STRADA,HEATR6,E2F1,CEP152,PCNA,ARL15,STIL,CCNE1,WLS,NR1H3,CDC45,SLC1A5,FANCG,CENPU,BR13BP,CCT5,PLAUR,TXNRD1,GA BARAP,VAT1,SLC46A1,E2F7,CENPI,ATL3,CAMTA1,BTG1,BAZ1B,CEP57,PAICS,PLEKHH3,KIAA0101,METTL2B,EEF1G,XRCC2,GINS2,AP3D1,PORC1,SEC22C,CCNE2,RAVER1,CASP8AP2,BIN1,CDC25A,RIF1,DCLRE1A,RBM15,GTTF2A1,C4orf27,ZBTB5,CREBZF,XP O1,ZNF784,UHRF1,DHX40,MCM3,CSTF2T,MSH2,ABHD2,TBC1D1,IER2,RPA2,FAM161A,HNRNPF,ATAD2,AP1S2,UPP1,TRIM37,TPD52L2,IGSF8,TTL9,HNRNPA0,LINC00273,SYPL1,TBC1D15,OGG1,CDK2,SLC25A3,ZNF367,PRKCSH,MUT,PRDM7,SLC25A42,RIC8B, RFC3,POLA1,FANCC,FDPS,MMAB,ATP2A1,PDE4DIP,MDC1,MFAP1,DNAJC9AS1,ZBTB8OS,UXT,MSH5,KITLG,UBE2T,NBR2,RFC4,CENPO,NUP155,PSMA1,PROSER1,CDC27,MIR17HG,KMT5C,CD3EAP,CDKN2C,PLCXD1,DPYSL2,HELLS,NOLC1,CDK5RAP3,HNRN PA1,HNRNPUL1,PFKFB4,CNTRL,DIAPH3,MCM4,AMIGO1,EBP,ARL6IP6,PHF20,ATAD3A,EEF1E1,RFWD3,AK2,STYK1,JMMT,PDS5A,RTTN,SRSF1,POLD3,TGOLN2,WDR74,DTL,DEK,HMGB2,PRPF40A,ZGRF1,HAUS8,DERA,BCL2L12,FDXR,YARS,RBM14,PPM1D,M UM1,LHX2,NUP153,WDPCCP,RQCD1,MLEC,ZRANB3,CA5BP1,HIST1H2BK,MGST3,PPOX,ZCWPW1,VEGFA,TICRR,C3orf58,RNF167,HIST1H4I,MYC,EZH2,KLF11,WYHV1,TRIM26,KIF25,DCTPP1,FAM222A,WDR76,MCM2,TMX1,HSD17B6,HIST1H2AM,BSG,RAD51B, CASP2,TTI1,UBC,NR2C2AP,CUX1,IRS2,FANCL,LMBN1,TUBB,ORC2,CDC7,ADAL,SHKBP1,ARHGEF40,CHEK1,PHF14,GTPBP1,VPRBP,ZNF131,SMC3,CTDSP2,ABHD11,TCF19,RBL1,CDT1,XRCC3,SCUBE2,NFATC2IP,MLH1,DBR1,ATP5G1,SLC25A36,FANCD2,RR M1,PTK2B,BANP,AP4M1,CALM1</p> <p>ncludesothers),MTHFD1,DNMT1,SLC20A1,MB21D1,NUSAP1,GF1B,PPP1R13L,CAMK2N2,FANCI,OXSR1,CISD2,ZNF766,CPT2,MCM6,MAK,CENPN,DMC1,ZNF384,CHRAC1,SPOP,KNTC1,OGT,AP4B1,MYL6,HDAC6,SUZ12,PIM1,SPC25,FAM73B,MYBL2,ANXA4,NOP5 8,CHAF1A,ZNF687,EAF2,PPEF2,MBNL3,CDCA3,ASF1B,RAD51AP1,USP1,BTD,CDCA7L,TAFA6,PHLPP2,TTL7, AEN,TIMELESS,HLTF,NUP160,SPEN,EMSY,GCDH,AGFG2,DIS3,POLE,CLCC1,MCM5,NCAPH2,ESYT1,ZMYND19,DHX15,PLSCR1,PPP1R7,IPO5,LRR1,G MNN,HSPE1,ZBTB4,DHFR,RFX1,DDX11,DDX39B,NUP205,CDKN1A,RBM23,TMEM116,SLBP,FSCN1,LTBP4,DDB2,BRCA1,NUCB2,MIS12,PSMC3,TREX1,CENPH,GORAB,MED17,ANKRD30BL,TIPIN,PRPS1,RBFOX1,PAN2,TRA2B,SNRNP,C17orf64,GPD2</p> |



**Supplemental Table 3: Functional annotation of genes bound by E2F7/8 in the promoter region**

| IPA Category                               | Chl P-seq | B-H P-value | Molecules                                                                                                                                                                                                                                                                                                                                                                                                                                                                                                                                                                                                                                                                                                                                                                                                                                                                                                                                                                                                                                                                                                                                                                                                                                                                                                                                                                                                                                                                                                                                                                                                                                                                                                                                                                                                                                                                                                                                                                                                                                                                                                                                                                                                                                                                                                                                                                                                                                                                                                                                                                                                                                                                                                                                                                                                                                                                                                                                                                                                                                                                                                                                                                                                                                                                                                                                                                                                                 |
|--------------------------------------------|-----------|-------------|---------------------------------------------------------------------------------------------------------------------------------------------------------------------------------------------------------------------------------------------------------------------------------------------------------------------------------------------------------------------------------------------------------------------------------------------------------------------------------------------------------------------------------------------------------------------------------------------------------------------------------------------------------------------------------------------------------------------------------------------------------------------------------------------------------------------------------------------------------------------------------------------------------------------------------------------------------------------------------------------------------------------------------------------------------------------------------------------------------------------------------------------------------------------------------------------------------------------------------------------------------------------------------------------------------------------------------------------------------------------------------------------------------------------------------------------------------------------------------------------------------------------------------------------------------------------------------------------------------------------------------------------------------------------------------------------------------------------------------------------------------------------------------------------------------------------------------------------------------------------------------------------------------------------------------------------------------------------------------------------------------------------------------------------------------------------------------------------------------------------------------------------------------------------------------------------------------------------------------------------------------------------------------------------------------------------------------------------------------------------------------------------------------------------------------------------------------------------------------------------------------------------------------------------------------------------------------------------------------------------------------------------------------------------------------------------------------------------------------------------------------------------------------------------------------------------------------------------------------------------------------------------------------------------------------------------------------------------------------------------------------------------------------------------------------------------------------------------------------------------------------------------------------------------------------------------------------------------------------------------------------------------------------------------------------------------------------------------------------------------------------------------------------------------------|
|                                            | E2F7      | 1.38E-21    | POU2F1, FEN1, RFC3, POLA1, FANCC, ABCB6, VPRBP, CLSPN, MDC1, E2F3, SMC3, MSH5, KITLG, TFAP4, UBE2T, RBL1, CDT1, XRCC3, CDC6, CBX3, KMT5C, TOP2A, RAD54L, MCM10, CDKN2C, CDK5RAP2, SYDE1, MLH1, PSMC3IP, HELLS, EBNA1BP2, RFC1, CDK5RAP3, HNRNPA1, FANCD2, RRM1, HAT1, PTK2B, BRCA2, MCM4, SETMAR, ZNF219, RECQL, EXO1, CYR61, RMI2, DNMT1, E2F1, RFWD3, NUSAP1, CEP152, PCNA, SUMO1, ORC1, PDS5A, FANCI, STIL, CCNE1, CDC45, RFC2, FANCG, SIN3A, MCM6, DMC1, DSN1, POLD3, NASP, DTL, KNTC1, DEK, PARP1, DAXX, HMGB2, PIM1, SPC25, MYBL2, CHAF1A, BAZ1B, CEP57, PPM1D, ASF1B, MUM1, SKA2, KIAA0101, XRCC2, USP1, RAD51AP1, RRM2, POLA2, CDKN2D, ZRANB3, AEN, CCNE2, UNG, VEGFA, CDC25A, HIST1H4A, BIN1, TIMELESS, HLTFF, RIF1, DCLRE1A, HIST1H4I, BRIP1, MYC, EZH2, XPO1, POLE, UHRF1, MCM3, NCAAPH2, MSH2, TNFAIP8, KIF25, RPA2, SMC1A, PPP1R7, MCM2, IPO5, LIG1, GMNN, BSG, SETX, ZBTB4, MSH6, E2F2, CDKN1A, RAD51B, CASP2, TTI1, DDB2, BRCA1, OGG1, IRS2, MIS12, FANCL, TREX1, CENPH, CDK2, ORC2, WEI1, CDC7, UCK2, MMS22L, TIPIN, DUT, RPA3, SNRBP, CHEK1                                                                                                                                                                                                                                                                                                                                                                                                                                                                                                                                                                                                                                                                                                                                                                                                                                                                                                                                                                                                                                                                                                                                                                                                                                                                                                                                                                                                                                                                                                                                                                                                                                                                                                                                                                                                                                                                                                                                                                                                                                                                                                                                                                                                                                                                                                                                                              |
| DNA Replication, Recombination, and Repair | E2F8      | 5.70E-20    | XRCC1, HMGN2, STK24, FADD, DBF4, NDE1, MTCH1, PPP2R5A, AAGAB, ELL3, CDC6, CBX3, TOP2A, POLG2, RING1, CDK5RAP2, SYDE1, SMC2, NRAS, SLF2, HAT1, PARP3, PHLDA3, SFPQ, SUPT5H, ZMYND8, ZNF219, RECQL, NUDT1, BTC, ERCC5, MORF4L1, SUMO1, PEA15, C, REM, PFN1, RFC2, SIN3A, ENO1, DSN1, TSG101, SUPT4H1, NASP, RAD1, SH2B1, ARID4A, PARP1, DAXX, CHMP2B, PTGS2, PTPRE, TAOX2, FURIN, SKA2, SKA3, RRM2, CDKN2D, SKP2, ERBB2, POLQ, UNG, SMOX, CLTC, CACYBP, PAWR, BRIP1, TOP3B, CDKN1B, CCND1, XPC, S, MCT1A, LIG1, SMARCA5, SETX, PTN, TRIP13, MSH6, E2F2, KIF18A, RCC1, CBX1, CDK4, PPIA, AIMP1, KMT5A, SF3A3, WEE1, MMS22L, TRIM28, ABCA4, DUT, RPA3, KIFC1, SHC1, POU2F1, CBX5, ABCB6, SART3, CLSPN, RPA1A, E2F3, TOP3A, TFAP4, RAD54L, MCM10, ZWILCH, PR, C, PSMC3IP, RFC1, STAT6, RPA1B, BRCA2, EXO1, ATF2, RARA, KDM4B, E2F1, HINFP, CEP152, BAZ2A, TP53, PCNA, ARRB1, RAD52, STIL, SUV39H1, CCNE1, SNRPA1, FANCG, YBX1, NPM1, CCT5, P3H4, PPM1G, SFN, ACIN1, BRD4, TAF6L, SF3B4, TCEA1, E2F6, BAZ1B, CEP57, EH, MT1, SAC3D1, TRIP12, KIAA0101, ING2, PNKP, XRCC2, SYCE2, SPIDR, BRD2, CCNE2, PRPF6, CDC25A, KAT5, RIF1, DCLRE1A, XPO1, MUS81, UHRF1, RAD18, MCM3, MSH2, CDC14B, RPA2, HSPD1, ARL8B, ATAD2, NCAPG2, CAPN2, OGG1, NFKB1, BUB3, CDK2, UBE2N, TLK1, ID3, SMC4, ARID4B, RFC3, POLA1, FANCC, TNFRSF1A, MDC1, HMGB1, ABCD3, NCOA6, KITLG, UBE2T, HMGA2, RIOK3, KPNA1, KMT5C, CDKN2C, FBL, PTK2, HELLS, BCL6, HNRNPA1, RPS9, FANCE, RBAK, MCM4, IFI16, CIZ1, ERCC1, MCM7, POLD1, BAG6, RFWD3, RBBP7, KIF11, P, DSSA, ASH2L, HSPA8, DGKZ, MEF2D, TPX2, EME1, POLD3, DTL, RAD51C, SP1, NME1, FAM111A, DEK, CDC45, HMGB2, BANF1, ACTL6A, CDC42, ATFF7IP, FLCN, DD3X3, LMNA, GNAI3, SMUG1, ZRANB3, TMPO, PRKCH, ORC3, HIST4H4, HIST1H4D, POGZ, IRF3, HIST1H4C, HIST1H3, HIST1H4A, MELK, HIST1H3F, HIST1H4E, HIST1H4H, HIST1H3G, HIST1H4I, HIST1H4B, BLM, MYC, EZH2, VCP, KIF25, TBP, RBBP5, RNF168, CENPA, RNF169, MCM2, CTNND1, BSG, GNAI2, TERF1, RAD51B, KAT7, CASP2, SPRTN, TTI1, MAD2L1BP, FANCL, ATM, ORC3, PXXN, M, CM8, CDC7, CIT, CHEK1, MUTYH, VPRBP, NR4A3, CYCS, SMC3, MTBP, PRIMPOL, PUS7L, VMP1, NCAPD3, RBL1, CDT1, XRCC3, CYP1B1, MDM4, SF3B5, MLH1, ARHGAP1, ACO2, EBNA1BP2, FANCD2, RRM1, PTK2B, PHF1, BANP, LONP1, SYTL1, STAT5B, DCLRE1C, ITGA5, RNAS, H2A, PPP1CC, MCL1, DNMT1, DCLRE1B, ZBTB20, HIPK1, NUSAP1, DNAJC2, PURA, ELP3, SNRNP200, TFAM, FANCI, NAA60, PNP, MCM6, XRN2, XRCC4, DMC1, NOL8, MAP3K12, KNTC1, LSM4, SNRPD2, PCGF2, PIM1, SPC25, CCNA2, CHAF1A, RAD51, CDK1, MGEA5, ESPL1, DC, TN2, HNRNPA1, USP1, RAD51AP1, N4BP2, POLA2, SYF2, GNLI, MRE11A, COPS7A, APITD1/APITD1-CORT, AEN, SPAG5, GATAD2A, REL, DSCC1, LEF1, TIMELESS, HLTFF, SPI1, TRIM33, KIF2C, TNPO3, POLE, RNASEH2K, NUBP1, ALDH3A1, NCAPH2, TNFAIP8, BBC3, PPP1R7, IPO5, DEDD, GMNN, SLC29A1, NEK4, STAMBP, ZBTB4, LDLR, XRCC5, CDKN1A, WDHD1, SUPT16H, D, DB2, BRCA1, TOPORS, MIS12, CENPV, TREX1, CENPH, TNFAIP1, GLI2, SIRT2, WRN, STMN1, RPS3, TIPIN, NABP2, PKN2, WHSC1, SNRBP, DHX9, CASP8                                                                                                                                                                                                                                                                                                                                                                                                             |
| Cell Cycle                                 | E2F7      | 3.44E-17    | RFC3, FEN1, POLA1, FANCC, VPRBP, CLSPN, MDC1, HNRNPD, E2F3, SMC3, CCNT2, PKMYT1, MSH5, KITLG, TFAP4, RBL1, CDT1, XRCC3, CDC6, CDC27, MIR17HG, KMT5C, TOP2A, RAD54L, MCM10, CDKN2C, LEMD3, CDK5RAP2, MLH1, PSMC3IP, HELLS, EBNA1BP2, NOLC1, R, FC1, CDK5RAP3, FANCD2, RRM1, HAT1, PTK2B, BANP, BRCA2, DIAPH3, MCM4, SETMAR, FBOXO5, ZNF219, RECQL, YEATS4, EXO1, CYR61, STRADA, RMI2, CALM1 (includes others), DNMT1, E2F1, RFWD3, NUSAP1, CEP152, PCNA, GF11B, PPP1R13L, PDS5A, CAMK2N2, STIL, CCNE1, RFC2, CDC45, FANCG, DMC1, DSN1, SRSF1, NASP, PLAU, DTL, KNTC1, EGR1, E2F7, CENPI, DEK, DAXX, PARP1, HMGB2, PIM1, SPC25, PRPF40A, MYBL2, CHAF1A, R, HEB, HAU5, BCL2L2, CDC23, BTG1, RBM14, PPM1D, CEP57, ING3, SKA2, KIAA0101, NUP153, XRCC2, USP1, RAD51AP1, CDKN2D, ZRANB3, TAF6, CCNE2, CASP8AP2, VEGFA, CDC25A, AATF, RNF167, DCLRE1A, KIF2A, ZBTB5, MYC, XPO1, EZH2, POLE, UHRF1, MCM3, NCAPH2, MSH2, KIF25, RPA2, PLSCR1, SMC1A, PPP1R7, MCM2, IPO5, LIG1, GMNN, DHFR, DDX11, E2F8, MSH6, E2F2, CDKN1A, RAD51B, CASP2, UBC, TTI1, DDB2, BRCA1, CUX1, IRS2, MIS12, FANCL, LMNB1, TUBB, CENPH, CDK2, ORC2, CD44, WEE1, CDC7, MMS22L, TIPIN, RPA3, SN, RPB, CHEK1                                                                                                                                                                                                                                                                                                                                                                                                                                                                                                                                                                                                                                                                                                                                                                                                                                                                                                                                                                                                                                                                                                                                                                                                                                                                                                                                                                                                                                                                                                                                                                                                                                                                                                                                                                                                                                                                                                                                                                                                                                                                                                                                                                                                                                                 |
| Cell Cycle                                 | E2F8      | 1.04E-18    | HMGN2, XRCC1, FADD, DBF4, NDE1, CCNT2, PPP2R5A, CDC6, SST, TOP2A, TXNIP, SENP5, LEMD3, CDK5RAP2, SMC2, OSBPL9, FOXG1, NRAS, GBF1, CDC123, HAT1, MAP3K1, SFPQ, SUPT5H, FBOXO5, ZMYND8, ZNF219, RECQL, NUDT1, BTC, FKBP1A, MORF4L1, PEA15, CREM, PFN1, CLIP1, PER1, RFC2, DSN1, TSG101, SUPT4H1, NASP, RAD1, SH2B1, PARP1, DAXX, CHMP2B, PTP4A1, PTGS2, RHEB, TAOX2, CDC23, RPL7A, SKA2, SKA3, TRIM24, HAU5, SKP2, CDKN2D, ERBB2, AHCTF1, CLTC, WNK1, CDK8, PAWR, HAU5, TOP3B, CDKN1B, CCND1, X, PC, MASTL, F2RL1, SMC1A, LIG1, SMARCA5, PTN, TRIP13, E2F8, CALCR, MSH6, E2F2, KIF18A, ARPP19, RCC1, CDK4, CBX1, TRIM25, RBM3, TPR, KMT5A, AIMP1, SF3A3, WEE1, CD44, MMS22L, NAMPT, RPA3, KIFC1, SHC1, POU2F1, EFHC1, CLSPN, E2F3, MFN2, JUND, TFAP4, PH, F8, PRKCE, MYO19, RAD54L, MCM10, ZWILCH, PRCC, PSMC3IP, NUMA1, RFC1, VCAN, STAT6, BRCA2, HES1, EIF2S1, MYOCD, YEATS4, EXO1, ATF2, STRADA, RARA, KDM4B, E2F1, HINFP, CEP152, BAZ2A, TP53, PCNA, ARRB1, RAD52, STIL, SUV39H1, CCNE1, SNRPA1, FANCG, YBX1, NPM1, CUL3, PPM1G, SFN, USP37, PLAU, ACIN1, CENPI, CLK1, BRD4, TSC22D1, TAF6L, NUP214, SF3B4, E2F6, JTB, BTG1, BAZ1B, IRF9, CEP57, EHMT1, THOC2, SAC3D1, KIAA0101, ING2, XRCC2, IQGAP3, SYCE2, GORASP2, RGCC, SPIDR, CCNE2, CASP8AP2, PRPF6, PIK3R4, CDC25A, KAT5, DCLRE1A, KIF2A, ZBTB5, KHDRBS1, XPO1, PDXP, THAP5, MUS81, PSMC5, TUBA1B, UHRF1, RAD18, MCM3, MSH2, CDC14B, RPA2, ARL8B, GATA6, NCAPG2, CAPN2, NFKB1, MAP3K11, BUB3, CDK2, ID3, SMC4, DTYMK, TAB1, ARNTL2, GAS6, RFC3, POL, A1, FANCC, TNFRSF1A, MDC1, HNRNPD, PES1, WAS, LRIG1, HMGB1, KITLG, HMGA2, GPS2, mir-154, RIOK3, KPNA1, KMT5C, CDKN2C, DARS, PTK2, HELLS, BCL6, NOLC1, CDK5RAP3, RPS9, PDLIM7, RAD9B, PTGES3, DIAPH3, IFI16, MCM4, GTF2H1, CIZ1, ERCC1, KIAA0753, CCNT1, SRSF3, RMI2, MCM7, POLD1, RFWD3, RBBP7, KIF11, PDS5A, HSPA8, NES, DGKZ, TPX2, EM, E1, SRSF1, TAF2, DTL, NME1, RAD51C, SP1, CDC45, DEK, HMGB2, PRPF40A, BANF1, HERC5, CEP250, TADA3, HAU5, ACTL6A, MAP4, BCL2L2, BHLHE40, CDC42, RBM14, PPM1D, FLCN, ING3, CD320, FOXK1, NUP153, RANBP1, DDX3X, LMNA, GNAI3, RGL2, HAU5A, CDKL1, ZR, ANB3, TMOD3, PRKCH, TMPO, ORC3, HEXIM1, MECOM, MELK, RNF167, BLM, MYC, EZH2, VCP, KIF25, CENPA, KDM5A, MCM2, CDC37, CTNND1, GNAI2, TERF1, RAD51B, CASP2, LAS1L, UBC, TTI1, MAP3K7, MAD2L1BP, LMNB1, TUBB, ATM, ORC2, MCM8, UBE2D3, CDC7, CIT, CH, EK1, CD2AP, VPRBP, NR4A3, PNN, SMC3, CD274, MTBP, PRIMPOL, NCAPD3, RBL1, CDT1, XRCC3, CYP1B1, OMG, TAF1, MDM4, DLG1, SF3B5, MLH1, ARHGAP1, PLAC8, EBNA1BP2, FANCD2, RRM1, PTK2B, BANP, STAT5B, DCLRE1C, ITGA5, JUNB, PPP1CC, FOSL2, CALM1 (includes others), MCL1, DCLRE1B, ZBTB20, DNMT1, NUSAP1, PURA, SNRNP200, GF11B, PPP1R13L, CAMK2N2, BTG3, XRCC4, DMC1, CCNB1IP1, SREBF1, GNB2L1, BBS4, CAP1, VCIPI1, MAP3K12, KNTC1, LSM4, TM4SF1, SNRPD2, PCGF2, PIM1, SPC25, CCNA2, CHAF1A, RAD51, PTMA, EIF2AK3, CDK1, MGEA5, LIN28A, POLR2A, ESPL1, DCTN2, HNRNPA1, RRM1, HAT1, PTK2B, BRCA2, MTAIP, MCM4, SETMAR, PMAIP1, RECQL, YEATS4, CYR61, CALM1 (includes others), SPI1, AATF, TRIM33, KIF2C, DAPK3, TNPO3, MADD, POLE, NUBP1, ALDH3A1, CDK5RAP1, NCAPH2, C6orf89, PLSCR1, PPP1R7, MAPRE1, IPO5, GMNN, NEK4, DHFR, DDX11, XRCC5, CDKN1A, WDHD1, TCEB1, EIF6, YWHAB, SUPT16H, DDB2, BRCA1, MIS12, FBOX4, CEN, PV, MNT, NUCKS1, CENPH, PTPN2, GLI2, SIRT2, NR1H2, STMN1, WRN, RPS3, TIPIN, NABP2, PBX1, FHL2, PHB2, PKN2, WHSC1, DHX9, SNRBP, CASP8, NFE2L2 |
| Cellular Growth and Proliferation          | E2F7      | 7.15E-08    | FEN1, RFC3, GTPBP1, POLA1, ABCB6, VPRBP, FANCC, ZNF131, CLSPN, ALDOA, HNRNPL, HNRNPD, E2F3, SMC3, UXT, KITLG, TFAP4, TCF19, RBL1, RFC4, CDT1, CDC6, CDC27, MIR17HG, KMT5C, CFDP1, TOP2A, MCM10, CDKN2C, LEMD3, MLH1, DPYSL2, SLC12A4, HELLS, EB, NA1BP2, ATP5G1, RFC1, NOLC1, CDK5RAP3, FANCD2, HNRNPA1, RRM1, HAT1, PTK2B, BRCA2, MTAIP, MCM4, SETMAR, PMAIP1, RECQL, YEATS4, CYR61, CALM1 (includes others), MTHFD1, DNMT1, ATAD3A, EEF1E1, E2F1, SLC20A1, EIF3B, PCNA, SUMO1, AK2, ORC1, GF11B, PPP1R13L, IMMT, CAMK2N2, STIL, CCNE1, NR1H3, CISD2, CDC45, WLS, SIN3A, CCT5, SRSF1, NASP, PLAU, DTL, GABARAP, TXNRD1, EGR1, OGT, E2F7, PARP1, DAXX, HD, AC6, HMGB2, SUZ12, SLC2A4, PIM1, MYBL2, MCFD2, RHEB, NOP58, EAF2, BTG1, FOXR, YARS, PPM1D, GABPB2, KIAA0101, XRCC2, RRM2, USP1, CDKN2D, PPRC1, CDA7L, CDA7, TAF6, CASBP1, PHLPP2, TLL7, CCNE2, VEGFA, BIN1, CDC25A, IGF2BP3, TIMELESS, HLTFF, A, DAM15, AATF, DCLRE1A, RBM15, ZBTB5, KIF2A, BRIP1, MYC, EZH2, UHRF1, MCM3, KLF11, MCM5, TNFAIP8, MSH2, mir-663, DHX15, HNRNPF, PLSCR1, SMC1A, MCM2, LIG1, ATAD2, UPP1, GMNN, BSG, TPD52L2, HNRNPA0, RFX1, DHFR, E2F8, E2F2, CDKN1A, RAD51B, CASP2, FSCN1, UBC1, LTBPA4, DDB2, BRCA1, SOX6, NUCB2, OGG1, CUX1, SEMA6B, IRS2, LMNB1, FANCL, TUBB, PSMC3, CDK2, C, D44, WEE1, CDC7, PRKCSH, TIPIN, RPA3, SLC25A42, PHF14, CHEK1                                                                                                                                                                                                                                                                                                                                                                                                                                                                                                                                                                                                                                                                                                                                                                                                                                                                                                                                                                                                                                                                                                                                                                                                                                                                                                                                                                                                                                                                                                                                                                                                                                                                                                                                                                                                                                                                                                                                                                                                                                                                                   |

**Supplemental Table 3: Functional annotation of genes bound by E2F7/8 in the promoter region**

| IPA Category                      | Chl P-seq | B-H P-value | Molecules                                                                                                                                                                                                                                                                                                                                                                                                                                                                                                                                                                                                                                                                                                                                                                                                                                                                                                                                                                                                                                                                                                                                                                                                                                                                                                                                                                                                                                                                                                                                                                                                                                                                                                                                                                                                                                                                                                                                                                                                                                                                                                                                                                                                                                                                                                                                                                                                                                                                                                                                                                                                                                                                                                                                                                                                                                                                                                                                                                                                                                                                                                                                                                                                                                                                                                                                                                                                                                                                                                                                                                                                                                                                                                                                                                                                                                                                                                                                                                                                                                                                                                                                                                                                                                                                                                                                                                                                                     |
|-----------------------------------|-----------|-------------|-------------------------------------------------------------------------------------------------------------------------------------------------------------------------------------------------------------------------------------------------------------------------------------------------------------------------------------------------------------------------------------------------------------------------------------------------------------------------------------------------------------------------------------------------------------------------------------------------------------------------------------------------------------------------------------------------------------------------------------------------------------------------------------------------------------------------------------------------------------------------------------------------------------------------------------------------------------------------------------------------------------------------------------------------------------------------------------------------------------------------------------------------------------------------------------------------------------------------------------------------------------------------------------------------------------------------------------------------------------------------------------------------------------------------------------------------------------------------------------------------------------------------------------------------------------------------------------------------------------------------------------------------------------------------------------------------------------------------------------------------------------------------------------------------------------------------------------------------------------------------------------------------------------------------------------------------------------------------------------------------------------------------------------------------------------------------------------------------------------------------------------------------------------------------------------------------------------------------------------------------------------------------------------------------------------------------------------------------------------------------------------------------------------------------------------------------------------------------------------------------------------------------------------------------------------------------------------------------------------------------------------------------------------------------------------------------------------------------------------------------------------------------------------------------------------------------------------------------------------------------------------------------------------------------------------------------------------------------------------------------------------------------------------------------------------------------------------------------------------------------------------------------------------------------------------------------------------------------------------------------------------------------------------------------------------------------------------------------------------------------------------------------------------------------------------------------------------------------------------------------------------------------------------------------------------------------------------------------------------------------------------------------------------------------------------------------------------------------------------------------------------------------------------------------------------------------------------------------------------------------------------------------------------------------------------------------------------------------------------------------------------------------------------------------------------------------------------------------------------------------------------------------------------------------------------------------------------------------------------------------------------------------------------------------------------------------------------------------------------------------------------------------------------------------------|
| Cellular Growth and Proliferation | E2F8      | 2.68E-15    | DAPK2,BIN3,XRCC1,STK24,ALDOA,HNRNPL,FADD,DBF4,ITGA7,MTCH1,POLR2K,NDE1,TCHP,AAGAB,CD300A,NFKBIB,CDC6,SST,PIAS3,PTOP2A,EEF1A1,TXNIP,RING1,LEMD3,COL8A1,ENAH,C8orf44-SGK3/SGK3,FOXG1,NRAS,GTPBP3,GBF1,HAT1,CDC123,PTPN12,MAP3K1,SFPQ,FST,MTAP,MAP3K4,PMAIP1,RECQL,NUDT1,SF3A2,BTC,INO80B,PTP4A2,FKBP1A,MORF4L1,SUMO1,FAIM,PEA15,CREM,FKBP5,VTI1A,PFN1,CLIP1,PER1,SIN3A,EFNA1,HK2,ENO1,TSG101,EXOSC9,NASP,SH2B1,ARID4A,TPM3,PARP1,DAXX,PTP4A1,DUS2,PTGS2,PTPTE,MCFD2,RHEB,AFAP1,FURIN,HAX1,MICU1,TRIM24,USP21,TMEM127,RRM2,PALLD,SKP2,CDKN2D,ERBB2,CDCA7,FBXO9,CBLB,SMOX,CLTC,IGF2BP3,WNK1,CACYBP,ADAM15,CDK8,PAWR,PRESB,BRIP1,NPAS4,TP3B,CDKN1B,CCND1,XPC,MT2A,F2RL1,SMC1A,LIG1,EED,HRH1,IL15RA,SMARCA5,NREP,PTN,NDUFAF3,E2F8,CALCR,E2F2,KIF18A,EPB41L5,NAIF1,NOC3L,CDK4,CBX1,TRIM25,PPIA,UTP6,RBM3,TPR,AIMP1,KMT5A,KCNN4,SF3A3,CD44,WEE1,MSI2,TRIM28,NAMPT,CCDC115,SPA3,SHC1,ETV1,CLDN7,ABC2B,SART3,LAMC1,CLSPN,E2F3,CRADD,C3AR1,TP3A,ZNF335,MFN2,JUND,TFAP4,RGS2,HSPB6,PRKCE,PSR1,CFDP1,PEG10,STAP2,MCM10,PRCC,CFAP45,TFAP2A,NUMA1,G3BP1,MALAT1,RFC1,CAV2,VCAN,STAT6,RAP1B,BRCA2,HESE1,GPRIN1,KRT17,YEATS4,MYOCD,ATF2,RARA,MED31,ARHGFEF12,E2F1,MAFA,STIM1,TESK1,TP53,PCNA,ARRB1,ADAM17,RAD52,CLN3,SUV39H1,STIL,CCNE1,NR1H3,WLS,CDCA5,RUSC1,YBX1,NPM1,CCT5,CUL3,PPM1G,SFN,TOE1,TCOF1,USP37,SURF1,CD99,UNC119,PLAUR,TXNRD1,S100A13,GABARAP,RXR,ACIN1,CLK1,AHSA1,SLC25A6,BRD4,TSC22D1,KAT6B,NUP214,E2F6,BTG1,ITB,SAC3D1,KIAA0101,SLC2A8,BASP1,FLII,ING2,PNKP,XRCC2,PPRC1,RGCC,RELT,SRSF6,CCNE2,PRPF6,CDCA5A,NFIB,DCLRE1A,GRB7,ZBTB5,KHDRBS1,KIF2A,RRAGB,RAB8A,MUS81,PSMCS,UHRF1,ARL11,MCM3,DGKA,EXOSC2,EIF3F,MSH2,CDCA14B,DIDO1,HNRNPF,HSPD1,ATAD2,UPP1,GATA6,BPNT1,TPD52L2,ZP3,HNRNPA0,IL1R1,EBI3,WASF2,HMGN5,CAPN2,OGG1,NFKB1,FOXO1,MAP3K11,BUB3,CDK2,ITGAX,UBE2N,GLI3,ID3,ZNF451,CXCL2,BRPF1,RASSF4,DTYMK,ZNF580,PRKCSH,GOLPH3,ARID4B,DLX4,ARNTL2,GAS6,TACC1,CNBP,RFC3,TAGLN2,POLA1,TNFRSF1A,FANCC,MAPK10,LAMA3,RASGRP4,SLC22A4,HNRNPD,CMIP,PES1,VANGL1,DERL2,ANAPC5,CFLAR,WAS,AARS,LRIG1,HMG1,UXT,CD160,COX17,KITLG,HMGA2,PSMB2,GPS2,RFC4,mir-154,ARID3B,KMT5C,CDKN2C,DPYSL2,PTK2,HELLS,APEX2,BCL6,NOLC1,CDK5RAP3,HNRNPA1,HIST1H2AB,RPS9,PTGES3,SOC6,IFI16,PAK1IP1,MCM4,PRPF31,CIZ1,ERCC1,SRSF3,SHMT2,FOXO1,MCM7,ATAD3A,BAG6,EEF1E1,RBBP7,KIF11,HOXD13,CLIC1,AK2,IMMT,HSPA8,ASH2L,PSMC1,EIF4A1,NES,DGKZ,MEF2D,TPX2,USP4,NUMBL,MBD1,UCP2,SRSF1,NCOA5,PACSIN2,WNT7B,DTL,NME1,SP1,RALGDS,CDCA5,TSPAN3,HMGB2,TADA3,IGBP1,HSP90AB1,GADD45GIP1,ACTL6A,SH2D3C,FDXR,BHLHE40,EFNA4,CDCA42,YARS,PPM1D,FLCN,YBX3,CD320,FOXK1,RANBP1,LMNA,RGL2,DDX3X,PRKCH,CA5BP1,TMPO,WARS,ZNF668,KRT7,ROBO2,PDCD4,DROSHA,HEXIM1,IRF3,MECOM,MELK,BLM,MYC,EZH2,NAA38,DUSP6,STT3B,FBXO11,ZNF143,VCP,PRCP,TBP,CENPA,KDMSA,MCM2,DDX21,CDC37,LITAF,RNF5,CTNND1,BSG,SCAMP3,GNAI2,TERF1,RAD51B,HGFRP2,METTL3,INPP4A,CASP2,LAS1L,UBC,MAP3K7,DHPS,LMNB1,FANCL,SGPL1,TUBB,ATM,PXN,PMEL,SSBP3,MCM8,TNFRSF6B,RIT1,UBE2D3,RPL23A,CDCA7,POLR2H,IDE,THG1L,UCLH3,GAPDH,PHF14,CHEK1,GTPBP1,CLASP2,VPRBP,CD2AP,ZNF131,NR4A3,PNN,CD274,SMC3,BIRC3,GLA,SNIP1,RPS19,MTBP,H2AFZ,ACTB,PUS7L,TCF19,VMP1,S100A10,RBL1,CDT1,KIF1BP,CYP1B1,OMG,MDM4,MUC4,DLG1,ARHGAP1,MLH1,CNOT2,B3GNT5,NFIA,RTN4,PLAC8,EBNA1BP2,ATP5G1,COPS3,POU4F1,FANCD2,RRM1,RAB28,PTK2B,PHF1,ACE2,TNXB,EIF3H,LONP1,STAT5B,GNAT1,SAE1,ITGA5,DCLRE1C,STK4,JUNB,CTSZ,PPP1CC,FOSL2,MCL1,CALM1 (includes others),MYDGF,UBE4B,CNOT8,MTHFD1,PPIL1,ZBTB20,DNMT1,TNS4,HIPK1,SLC20A1,LEPROTL1,DNAJC2,DPEP1,PURA,SNRNP200,GFI1B,PPP1R13L,TFAM,CAMK2N2,TJAP1,NAA60,BTG3,BYSL,PNP,TEC,SLC1A3,XRN2,TXNRD2,XRCC4,CCAR2,ULBP2,CCR2,HLA-E,CAPS,LRRC8A,IGF2BP1,SREBF1,GNB2L1,BMF,ROBO1,MAP3K12,NOL8,B2M,FOXO2,OGT,ABI2,SOS1,RPS14,PCGF2,HDAC6,SUZ12,SLC2A4,PIM1,AGGF1,CCNA2,GN2,NOP58,RAD51,PTMA,HNRNPA2B1,TRA2A,EIF2AK3,EAF2,CDK1,AQP11,MGEA5,LIN28A,E,SPL1,NQO2,ZBTB7B,HNRNPC,DCTN2,FSTL3,USP1,CCT7,CDCA7L,RXRA,SFY2,ABI1,TIMM8A,TA66,MED19,PHLP2,FADS2,DGCR8,TFRC,STRN,MRE11A,REL,HMMR,MTF2,LEF1,STAT2,RGPD4 (includes others),TIMELESS,SEMA6A,HLTF,SP1,PRPF3,AATF,TRIM33,ANK3,AGTRAP,KIF2C,DAPK3,MADD,CRCP,COPE,NCAN,CLCA2,SERPINE1,NUBP1,LRKK2,ALDH3A1,MCM5,C6orf89,TNFAIP8,CLCF1,ALMS1,LGR4,BBC3,DHX15,PLSCR1,MAPRE1,BLZF1,TNFSF9,GMN,N,SLC29A1,STAMP,RFX1,DHFR,XRCC5,CDKN1A,EIF2B1,MUL1,ARFGFEF2,SLC25A14,COPS4,EIF6,FSCN1,CLK2,LTBP4,DDB2,BCRA1,NUC82,TOPORS,FBXO4,MNT,PSMC3,PTPN2,GLI2,FAM83A,DFD11,SIRT2,EEF1B2,NR1H2,STMN1,WRN,ATF4,DLG4,TIPIN,EGFR3,PBX1,DLX6,MAP3K2,ILF3,FHL2,ST7L,WHSC1,DHX9,CASP8,NFE2L2,IL12RB1 |
| Cell Death and Survival           | E2F7      | 2.47E-08    | POU2F1,FEN1,FANCC,VPRBP,ABC6,FDPS,ATP2A1,CLSPN,MDC1,ALDOA,E2F3,SMC3,UXT,PKMYT1,MSH5,KITLG,TFAP4,RBL1,CDT1,XRCC3,PSMA1,CDC6,MIR17HG,PTOP2A,FKBPL,MCM10,RAD54L,CDKN2C,MLH1,GBA,HELLS,RFC1,NOLC1,CDK5RAP3,FANCD2,RRM1,HNRNPA1,HAT1,PTK2B,HNRNPL,PSENE1,BRCA2,SETMAR,PMAIP1,FBXO5,RECQL,YEATS4,EXO1,CYR61,CALM1 (includes others),DNMT1,ATAD3A,EEF1E1,E2F1,SLC20A1,NUSAP1,EIF3B,SUMO1,PCNA,GFI1B,IMMT,PPP1R13L,CAMK2N2,STIL,CCNE1,NR1H3,CDCA45,CISD2,FANCC,SIN3A,CCT5,DMC1,SRSF1,SIVA1,DTL,PLAUR,TXNRD1,GABARAP,EGR1,OGT,SLC46A1,E2F7,CENPI,DEK,GPR180,PARP1,DAXX,HMGB2,HDAC6,SUZ12,SLC2A4,PIM1,SPC25,MYBL2,ANXA4,MCFD2,RHEB,NOP58,COX8A,HAUS8,EAF2,BCL2L12,PP2F2,BTG1,TK1,FDXR,YARS,PPM1D,ING3,LHX2,KIAA0101,RRM2,XRCC2,CDKN2D,CDCA7L,TA66,PHLPP2,AEN,CASP8A,P2,UNG,VEGFA,BIN1,CDCA5A,IGF2BP3,HLTF,ADAM15,AATF,DCLRE1A,BRIP1,MYC,EZH2,XPO1,DIS3,ITGB3BP,UHRF1,KLF11,MSH2,TNFAIP8,PLSCR1,SMC1A,MCM2,LIG1,ATAD2,TMX1,GMNN,HSPE1,BSG,SETX,DHFR,DDX11,E2F8,MSH6,E2F2,NUP205,CDKN1A,TBC1D15,PNPLA8,CASP2,UBC,DDB2,BCRA1,OGG1,SOX6,CUX1,IRS2,LMNB1,FANCL,TREX1,TUBB,PSMC3,CDK2,ORC2,WEE1,CD44,CDCA7,MMS22L,DUT,PRPS1,FOXK2,CHEK1                                                                                                                                                                                                                                                                                                                                                                                                                                                                                                                                                                                                                                                                                                                                                                                                                                                                                                                                                                                                                                                                                                                                                                                                                                                                                                                                                                                                                                                                                                                                                                                                                                                                                                                                                                                                                                                                                                                                                                                                                                                                                                                                                                                                                                                                                                                                                                                                                                                                                                                                                                                                                                                                                                                                                                                                                                                                                                                                                                                                                                                                                                                                                                                                                                                                                                       |



**Supplemental Table 3: Functional annotation of genes bound by E2F7/8 in the promoter region**

| IPA Category            | Chl P-seq | B-H P-value | Molecules                                                                                                                                                                                                                                                                                                                                                                                                                                                                                                                                                                                                                                                                                                                                                                                                                                                                                                                                                                                                                                                                                                                                                                                                                                                                                                                                                                                                                                                                                                                                                                                                                                                                                                                                                                                                                                                                                                                                                                                                                                                                                                                                                                                                                                                                                                                                                                                                                                                                                                                                                                                                                                                                                                                                                                                                                                                                                                                                                                                                                                                                                                                                                                                                                                                                                                                                                                                                                                                                                                                                                                                                                                                                                                                                                                                                                                                                                                                                                                                                                                                                                                                                                                                                                                                                                                                          |
|-------------------------|-----------|-------------|------------------------------------------------------------------------------------------------------------------------------------------------------------------------------------------------------------------------------------------------------------------------------------------------------------------------------------------------------------------------------------------------------------------------------------------------------------------------------------------------------------------------------------------------------------------------------------------------------------------------------------------------------------------------------------------------------------------------------------------------------------------------------------------------------------------------------------------------------------------------------------------------------------------------------------------------------------------------------------------------------------------------------------------------------------------------------------------------------------------------------------------------------------------------------------------------------------------------------------------------------------------------------------------------------------------------------------------------------------------------------------------------------------------------------------------------------------------------------------------------------------------------------------------------------------------------------------------------------------------------------------------------------------------------------------------------------------------------------------------------------------------------------------------------------------------------------------------------------------------------------------------------------------------------------------------------------------------------------------------------------------------------------------------------------------------------------------------------------------------------------------------------------------------------------------------------------------------------------------------------------------------------------------------------------------------------------------------------------------------------------------------------------------------------------------------------------------------------------------------------------------------------------------------------------------------------------------------------------------------------------------------------------------------------------------------------------------------------------------------------------------------------------------------------------------------------------------------------------------------------------------------------------------------------------------------------------------------------------------------------------------------------------------------------------------------------------------------------------------------------------------------------------------------------------------------------------------------------------------------------------------------------------------------------------------------------------------------------------------------------------------------------------------------------------------------------------------------------------------------------------------------------------------------------------------------------------------------------------------------------------------------------------------------------------------------------------------------------------------------------------------------------------------------------------------------------------------------------------------------------------------------------------------------------------------------------------------------------------------------------------------------------------------------------------------------------------------------------------------------------------------------------------------------------------------------------------------------------------------------------------------------------------------------------------------------------------------|
| Cell Death and Survival | E2F8      | 1.73E-13    | DAPK2,XRCC1,CLDN3,PPP1R1C,STK24,ALDOA,FADD,MTCH1,ITGA7,TCHP,PPP2R5A,CD300A,NFKB1B,SCARB2,DPP3,CDC6,SST,PTP4A,PIAS3,EEF1A1,FKBP1,TXNIP,DCAF7,GBA,C8orf44-SGK3/SGK3,FOXG1,NRAS,HAT1,MAP3K1,PHLDA3,SFPQ,FCMR,FST,MAP3K4,SUPT5H,PMAIP1,FBXO5,RECQL,NUDT1,BTC,PTP4A2,FKBP1A,ERCC5,TMEM109,SUMO1,FAIM,PEA15,CREM,FKBP5,VT11A,PFN1,PER1,SIN3A,EFNA1,ENO1,HK2,OLFM1,TSG101,RAD1,GPR180,TPM3,DAXX,PARP1,DUS2,ADAMTS12,PTGS2,PTPRE,LEO1,MCDF2,RHEB,TAOK2,SPG7,AFAP1,FURIN,TK1,HAX1,FRAT1,SKA3,TRIM24,HAUS1,RRM2,PALLD,SKP2,CDKN2D,ERBB2,ANO6,CBLB,FBXO9,RPL27A,SMOX,UNG,AHCTF1,MRPL41,IGF2BP3,ADAM15,CACYBP,PAWR,CDK8,BRIP1,NPAS4,CDKN1B,PUS10,CCND1,UBB,XPC,RPL27,MT2A,F2RL1,SMC1A,LIG1,IL15RA,ATP1A2,SMARCA5,PTN,SETX,MSH6,CALCR,E2F8,E2F2,RPL37,TESK2,KIF18A,PNPLA8,CDK4,PP1A,SNRPE,RBM3,TPR,AIMP1,KMT5A,KCN4,WEE1,CD44,MSI2,TRIM28,MMS22L,NAMPT,DUT,CAMLG,FOXK2,KIFC1,SHC1,TBCCD1,EFHC1,POU2F1,CLDN7,CBX5,ABCB6,CLSPN,E2F3,CRADD,RAP1A,C3AR1,ATP11C,MFN2,TMEM173,KLHL20,JUND,TFAP4,FAM129B,ZNF443,HSPB6,PRKCE,PEG10,STAP2,MCM10,RAD54L,PRCC,TFAP2A,NUMA1,MALAT1,RFC1,VCAN,STAT6,RAP1B,BRCA2,HES1,EIF2S1,KRT17,YEATS4,MYOCD,ATF2,EXO1,RARA,MTMR9,KDM4B,E2F1,PPP1R3F,STIM1,TP53,PCNA,ARRB1,ADAM17,RAD52,CLN3,STIL,SUV39H1,CCNE1,SNRPA1,NR1H3,ECE1,CDC45,FANCG,YBX1,NPM1,CCT5,CUL3,PPM1G,SFN,TCOF1,SURF1,CD99,UNC119,PLAUR,TXNRD1,GABARAP,RXR8,SAP30BP,ACIN1,SHQ1,CENPI,AHSA1,BRD4,SLC25A6,SOAT1,TSC22D1,IRF2BP2,COX8A,BTG1,E2F6,IRF9,EHMT1,THOC2,KIAA0101,SNRPD1,BASP1,FLJ11,ING2,PNKP,XRCC2,TEX10,BRD2,SPIDR,SRSF6,CASP8AP2,CDC25A,KAT5,NFIB,PFDN6,DCLRE1A,KHDRBS1,GRB7,XPO1,MUS81,PSMC5,UHRF1,RAD18,ARL11,DGKA,EIF3F,MSH2,DIDO1,HSPD1,ATAD2,ARL8B,GATA6,NCAPG2,TMEM123,IL1R1,TBC1D15,HMGNS,CAPN2,OGG1,NFKB1,MAP3K11,CDK2,GLI3,UBE2N,ID3,CXCL2,DTYMK,ITPRIP,RASSF4,GOLPH3,TM2D1,WBP1,DLX4,C5AR2,MEF2A,GAS6,TACC1,FASTK,TAGLN2,PPM1B,TFNRSF1A,FANCC,MAPK10,LAMA3,FDPS,ATP2A1,MDC1,CMIP,CFLAR,WAS,AARS,LRIG1,HIPK3,UXT,HMGB1,CD160,NCOA6,KITLG,HMGA2,GPS2,SCP2,mir-154,PSMA1,ARID3B,CDKN2C,FBL,PTK2,HELLS,PPP1R12B,BCL6,NOLC1,CDK5RAP3,HNRNPA1,FANCE,PDLIM7,HNRNPUL1,PTGES3,RAD9B,IFI16,SERPINI1,ERCC1,CCNT1,SHMT2,MCM7,FOXP1,ATAD3A,BAG6,EEF1E1,KIF11,POLR1D,IMMT,HSPA8,TMEM57,PSMC1,EIF4A1,MEF2D,TPX2,NUMBL,MBD1,UCP2,EME1,NCOA5,SRSF1,SIVA1,DTL,NME1,SP1,RAD51C,TMBIM6,DEK,HMGB2,BANF1,HSP90AB1,TADA3,HAUS8,MAP4,ACTL6A,GADD45GIP1,BCL2L2,TFB1M,ITM2B,FDXR,BHLHE40,EFNA4,CDC42,YARS,PPM1D,FLCN,ING3,BNIP3L,YBX3,LRP8,RANBP1,DDX3X,LMNA,GNAI3,SMUG1,TFEC,TMOD3,PRKCH,PDCD4,PARP4,DROSHA,IRF3,HEXIM1,MECOM,MELK,MLLT11,BLM,MYC,NAA38,EZH2,DUSP6,VCP,WDR81,PRCP,TBP,CENPA,MCM2,CDC37,TMX1,RNF5,CTNND1,BSG,GNAI2,TERF1,KAT7,PAFAH1B3,INPP4A,EIF4A3,CASP2,UBC,MAP3K7,CSRNP1,FANCL,LMNB1,TAX1BP1,SGPL1,TUBB,ATM,PXN,ORC2,PMEL,TNFRSF6B,RIT1,MCM8,CDC7,IDE,THG1L,CIT,UCLH3,CHTOP,TNIP1,HSPBAP1,UBE2Q1,GAPDH,SERP1,CHEK1,LGMN,MUZYH,VPRBP,CD2AP,NR4A3,TSSK6,TMEM69,HIST1H2BO,CYCS,CD274,SMC3,BIRC3,RPS19,NEK8,MTBP,CAPN3,ACTB,SFR1,S100A10,RBL1,CDT1,XRCC3,CYP1B1,MDM4,MUC4,MLH1,ARHGAP1,CNOT2,ACO2,RTN4,PLAC8,OXR1,POU4F1,FANCD2,RRM1,PANX1,RAB28,PTK2B,PHF1,PSENEN,EIF3H,LONP1,STAT5B,GNAT1,ITGA5,DCLRE1C,STK4,RNASEH2A,JUNB,PPP1CC,FOSL2,MCL1,CALM1 (includes others),MYDGF,UBE4B,DNMT1,DCLRE1B,ZBTB20,NAPA,HIPK1,TNS4,SLC20A1,NUSAP1,DPEP1,PURA,GFI1B,PPP1R13L,TFAM,CAMK2N2,GLO1,BTG3,SIGMAR1,PNP,TEC,SLC1A3,PARP1A,PFKM,XRCCA,TXNRD2,SMURF1,CCAR2,NDUFV2,PPP1R11,DMC1,ULBP2,CCR2,HLA-E,LRRC8A,IGF2BP1,SREBF1,GNB2L1,BBS4,BMF,GMCL1,MAP3K12,B2M,FOXF2,OGT,PCGF2,HDAC6,SUZ12,SLC2A4,KHK,PIM1,SPC25,AGGF1,ANXA4,GNG2,CEACAM3,CCNA2,NOP58,RAD51,PTMA,EIF2AK3,B4GALT5,EAF2,CDK1,AQP11,MGEA5,COX5A,POLR2A,ESPL1,NQO2,NOD1,HNRNPC,DCTN2,ATP6AP1,FSTL3,SGCA,CCT7,COMMD4,MED6,CDCA7L,RXRA,SYF2,VPS41,TAF6,TMEM14A,PHLPP2,MRE11A,TFRC,BACE1,DGCR8,AEEN,REL,SPAG5,GATAD2A,HMMR,UBA7,FAF1,LEF1,STAT2,ZNF184,RGPD4 (includes others),CABLES2,SEMA6A,HLTF,SP1,AATF,USE1,TRIM33,ANK3,AGTRAP,NUDT2,DAPK3,DIS3,MADD,ARF4,CLCA2,SERPINE1,LRRK2,ALDH3A1,DUSP7,TNFAIP8,P4HB,CLCF1,ALMS1,LGR4,BBC3,PLSCR1,TNFSF9,CCBL1,ZFYVE16,DEDD,SLC29A1,GMNN,ATG13,NEK4,STAMBIP,LDLR,DHFR,DDX11,NUP205,XRCC5,CDKN1A,TCEB1,EIF2B1,CANX,EIF6,YWHAB,M6PR,CLK2,DDDB2,ICAM2,BRCA1,HSPB11,TOPORS,MNT,TREX1,PSMC3,FH,TRIP10,TNFAIP1,PTPN2,GLI2,FDFT1,NR1H2,SIRT2,PDHA1,STMN1,WRN,RPS3,SCYL3,PERP,ATF4,DLG4,EGR3,PBX1,MAP3K2,ILF3,PRPS1,PHB2,FHL2,PKN2,WHSC1,KDM6B,DHX9,CASP8,NFE2L2 |

**Supplemental Table 4: Liver specific functional annotation of genes bound by E2F7/8 in the promoter region**

| IPA Category             | ChIP-seq | B-H P-value | Molecules                                                                                                                                                                                                                                                                                                                                                                                                                                                                                                                                                                                                                                                                                                                                                                                                                                                                                                                                                                                                                                                                                                                                                                                                                                                                                                                                                                                                                                                                                                                                                                                                                                                                                                                                                                                                                                                                                                                                                                                                                                                                                                                                                                                                                                                                                                                                                                                                                                                                                                                                                                                                                                                                                                                                                                                                                                                                                                                                                                                                                                                                                                                                                                                                                                                                                                                                                                                                                                                                                                                                                                                                                                                                                                                                                                                                                                                                                                                                                                                                                                                                                                                                                                                                                                                                                                                                                                                                                                                                                                                                                                                                                                                                                                                                                        |
|--------------------------|----------|-------------|------------------------------------------------------------------------------------------------------------------------------------------------------------------------------------------------------------------------------------------------------------------------------------------------------------------------------------------------------------------------------------------------------------------------------------------------------------------------------------------------------------------------------------------------------------------------------------------------------------------------------------------------------------------------------------------------------------------------------------------------------------------------------------------------------------------------------------------------------------------------------------------------------------------------------------------------------------------------------------------------------------------------------------------------------------------------------------------------------------------------------------------------------------------------------------------------------------------------------------------------------------------------------------------------------------------------------------------------------------------------------------------------------------------------------------------------------------------------------------------------------------------------------------------------------------------------------------------------------------------------------------------------------------------------------------------------------------------------------------------------------------------------------------------------------------------------------------------------------------------------------------------------------------------------------------------------------------------------------------------------------------------------------------------------------------------------------------------------------------------------------------------------------------------------------------------------------------------------------------------------------------------------------------------------------------------------------------------------------------------------------------------------------------------------------------------------------------------------------------------------------------------------------------------------------------------------------------------------------------------------------------------------------------------------------------------------------------------------------------------------------------------------------------------------------------------------------------------------------------------------------------------------------------------------------------------------------------------------------------------------------------------------------------------------------------------------------------------------------------------------------------------------------------------------------------------------------------------------------------------------------------------------------------------------------------------------------------------------------------------------------------------------------------------------------------------------------------------------------------------------------------------------------------------------------------------------------------------------------------------------------------------------------------------------------------------------------------------------------------------------------------------------------------------------------------------------------------------------------------------------------------------------------------------------------------------------------------------------------------------------------------------------------------------------------------------------------------------------------------------------------------------------------------------------------------------------------------------------------------------------------------------------------------------------------------------------------------------------------------------------------------------------------------------------------------------------------------------------------------------------------------------------------------------------------------------------------------------------------------------------------------------------------------------------------------------------------------------------------------------------------------------|
|                          | E2F7     | 9.12E-02    | VRK2,POU2F1,RFC3,POLA1,PANK2,FANCC,ABC86,MMAB,RALGAPA2,PDE4DIP,MDC1,DNAJC9-AS1,ZBTB80S,CCNT2,ARGLU1,UBE2T,PSMA1,CBX3,PROSER1,CDC27,TOP2A,CFDP1,SCUBE2,LEMD3,MLH1,ATAD5,PSMC3IP,DERL3,LTN1,SLC25A36,CDK5RAP3,ANP32E,RRM1,HNRNPA1,FANCD2,HNRNPUL1,CNTRL,BANP,DIAPH3,MCM4,PMAIP1,RE CQL,AP4M1,CYR61,PHF20,HEATR6,MTHFD1,EEF1E1,EZF1,PRIM2,NUSAP1,CEP152,SIK2,AK2,PDS5A,RTTN,FANCI,STIL,RFC2,CDC45,SLC1A5,SIN3A,CENPU,MCM6,MAK,DSN1,SRSF1,POLD3,NASP,PLAUR,TXNRD1,KNTC1,OGT,ATL3,CENPI,CAMTA1,D AXX,PARP1,LUC7L2,NOP58,ZNF687,HAUS8,EAF2,BCL2L12,BAZ1B,YARS,RBM14,MBNL3,ASF1B,CDC43,PAICS,METTL2B,RRM2,USP1,AP3D1,PPRC1,RQCD1,ZRANB3,CA58P1,TTL7,PPOX,CASP8A2,ZCWPW1,TICRR,BIN1,C3orf58,IGF2BP3,HLTF,ADA M15,NUP160,RNF167,ZBTB5,EMSY,MYC,EZH2,AGFG2,DIS3,SUCO,CLCC1,POLE,GMP5,MCM3,TRIM26,KIF25,TBC1D1,DCCTPP1,IPO5,ATAD2,AP1S2,HS017B6,BSG,IGSF8,TTL9,SETX,RF1,DDX39B,LINC00273,METTL2A,E2F8,MSH6,NUP205,E2F2,CDKN 1A,RAD51B,RBM23,TBC1D15,TMEM116,CASP2,TTI1,LTBP4,OGG1,SOX6,BRCA1,CUX1,FCHSD2,NUCB2,IRS2,CENPH,CDK2,CD44,WEE1,MMS22L,PRKCSH,ADAL,MUT,NAP1L4,PRDM7,PAN2,SLC25A42,TRA2B,RIC8B,ARHGEF40,GPD2                                                                                                                                                                                                                                                                                                                                                                                                                                                                                                                                                                                                                                                                                                                                                                                                                                                                                                                                                                                                                                                                                                                                                                                                                                                                                                                                                                                                                                                                                                                                                                                                                                                                                                                                                                                                                                                                                                                                                                                                                                                                                                                                                                                                                                                                                                                                                                                                                                                                                                                                                                                                                                                                                                                                                                                                                                                                                                                                                                                                                                                                                                                                                                                                                                                                                                                                                                                                                                                                                                                                                                                                                                                        |
| Hepatocellular Carcinoma | E2F8     | 1.53E-03    | VRK2,AUTS2,STK24,ITGA7,CCNT2,ARGLU1,HYDIN,TCHP,PHRF1,NFKBIL1,YOD1,ELL3,PPP3,CBX3,PIAS3,TOP2A,EEF1A1,NCOA7,LRRRC59,LEMD3,OTUD5,WDR25,DERL3,ENAH,SEMA4B,FOXP1,NRAS,ANP32E,GTPBP3,ZC3H10,WRAP53,NOL6,MAP3K1, SFPQ,ZSWIM3,MAP3K4,SUPT5H,PMAIP1,ZMYND8,RECQL,DLAT,DUSP11,FKBP1A,PRIM2,ERCC5,CNOT3,POLRMT,SIK2,FAIM,PET100,SEC24A,PFN1,FARP1,CLIP1,PPP1R37,CUTA,PER1,RFC2,SIN3A,HK2,DSN1,EXOSC9,NASP,KCTD2,CEP44,PAN3,HIV EP1,FOXRED1,ARMCS,SKIDA1,TM9SF4,ARID4A,DAXX,PARP1,PTGS2,DCTN4,PTPRE,LUC7L2,DENND1A,CCDC82,ZMYM4,NUP188,RPL7A,TNRC6B,SKA3,TRIM24,TMEM127,RRM2,PALLO,KANSL3,SKP2,ERBB2,ANO6,FBXO9,CBLB,POLQ,PLB1,UMPS,AK R1D1,TMEM237,AHCTF1,SMOX,TMEM209,CLTC,ALDH7A1,IGF2BP3,WNK1,U2SURP,ADAM15,CACYBP,KIAA0825,CDK8,EHBP1,IMP1,CDKN1B,SUCO,CCND1,NENF,GMP5,TOR3A,CIC,TMEM167B,GALNT9,MT2A,DNNTIP2,TAF1A,OSGEPL1,MINOS1-NBL1/NBL1,COASY,ATP1A2,SMARCA5,SETX,ACSL1,METTL2A,MSH6,E2F8,E2F2,RPL37,TROVE2,USP24,QSER1,SLC39A8,PRR5L,FCHSD2,CDK4,TRIM25,VPS45,TTL3,MYO1F,LRRRC49,TPR,GABRQ,KMT5A,WEE1,CD44,MSI2,MRPL24,RCOR3,ZBTB9,MM S22L,IER5,ABCA4,TMEM55B,CCDC115,ACTR10,KIFC1,MPV17,ARHGAP21,SHC1,EFHC1,POU2F1,ETV1,PANK2,ABC86,SART3,LAMC1,TROAP,LHFPL2,MYPOP,C3AR1,ZNF335,ATP11C,MFN2,FAM129B,PHF8,VAR2,CFDP1,SREK1IP1,STAP2,ATAD5,PRC C,PSMC3IP,LTN1,TFAP2A,NUMA1,MALAT1,PPP6R2,VCAN,ZCCHC11,GPRIN1,MYOCD,ATF2,CHMP7,HEATR6,MTMR9,RARA,ZFYVE19,KDM4B,OSBPL5,MED31,ARHGEF12,E2F1,MAFA,CDK17,PPP1R3F,CEP152,HDLPB,BAZ2A,TP53,ARRB1,C3orf38,ADA M17,LRMP,STIL,CDC45,SLC1A5,RUSC1,CENPU,RTN3,NPM1,PPM1G,TOE1,TCOF1,USP37,DHX8,PLAUR,TXNRD1,WDR24,KHSRP,RXR8,SIL1,CPBE3,CENPI,ZNF181,KBTBD2,ATL3,PDZD2,CLK1,KIAA0907,CAMTA1,FHOD1,BRD4,KPNA6,KAT6B,NUP214,S F3B4,BAZ1B,THOC2,WHSC1L1,TBL1X,C14orf159,PAICS,C2orf44,TRAPPC4,JPH2,METTL2B,PABPN1,CCDC22,IQGAP3,TEX10,AP3D1,GORASP2,PPRC1,SRRM1,ABCA10,MRPS28,SPIDR,BRD2,RELT,CASP8A2,N4BP2L2,MMACHC,PRPF6,PIK3R4,KAT5,N FIB,VPS72,ZBTB5,CCDC12,POLR2M,RRAGB,PSMC5,MCM3,DGKA,VEZF1,KCNH4,DIDO1,HSPD1,ATAD2,AP1S2,BPNT1,NCAPG2,TTL9,COL12A1,LINC00273,TBC1D15,UBE3C,SP4,OGG1,HMGCS1,NFKB1,PRSS16,MAP3K11,1DH3B,PCNXL2,CDK2,UBE2N, TLK1,GLI3,ID3,MED24,IGFLR1,ZNF451,TPCN1,DLGAP1,PRKCSH,GOLPH3,ABCF3,TM2D1,ARID4B,ARNTL2,MEF2A,RIC8B,GAS6,STK19,RFC3,COL7A1,POLA1,FANCC,MMAB,EHBP1L1,LAMA3,PDE4DIP,GDI2,MDC1,ZBTB80S,PNISR,WNT2B,ANAPC5,BRM S1L,CFLAR,EXOC1,MARS,HIPK3,HMGB1,NCOA6,UBE2T,HMGA2,PSMA1,ZBTB45,MBIP,HOXB6,RIOK3,KPNA1,C9orf84,DARS,NKD2,EVI5L,ANKRD44,CDK5RAP3,HNRNPA1,HNRNPUL1,CNTRL,RBAK,SOC5,HIST1H2BD,AGPAT4,DIAPH3,IFI16,MCM4,CIZ1, C2orf81,KIAA0753,ANKRD11,CCNT1,PHF20,FOXP1,NUFIP1,MCM7,BAG6,EEF1E1,ASRGL1,ZCCHC9,CLIC1,AK2,PDS5A,RTTN,HSPA8,PSMC1,NES,EIF4A1,TPX2,UCP2,SENP3,NCOA5,SRSF1,POLD3,NCALD,TFE2,KR11,TMEM230,DHTKD1,NME1,RAD51C,S P1,C12orf73,CEP250,HAUS8,POPS,INTS4,BCL2L12,TFB1M,ITM2B,BHLHE40,YARS,RBM14,FLCN,KLHL28,FOXK1,LRP8,AAAS,RGL2,PHF3,LMNA,DLGAP3,TRAPPC9,MPI,SMUG1,CAD,ZRANB3,CA58P1,PRKCH,WARS,LRRRC46,PGAP1,ATP1B3,PPOX,KRT7, ROBO2,SLC7A10,ZCWPW1,DROSHA,TICRR,PTER,POGZ,MECOM,HIST1H3B,C3orf58,HIST1H3F,HIST1H3G,RNF167,CSTF1,TMEM38B,TRAPPC5,PMVK,BLM,MYC,EZH2,TRANK1,FBXO11,VCP,WDR81,TRIM26,KIF25,AOAH,DCCTPP1,RBBP5,TBP,STK11IP, RNF168,L3MBTL2,CENPA,USP54,INTS5,RNF5,HIST1H2BG,BSG,WDR33,CDC20B,RAD51B,C1orf112,INPP4A,DENND5A,CASP2,TTI1,ZBTB43,MAP3K7,SGTB,NBR1,SGPL1,TAX1BP1,ATM,PMEL,PEX16,GNL3L,TNFRSF6B,GOLGB1,GANAB,IDE,CHTOP,CIT, TNIP1,APC2,ARHGEF40,FAM208A,CLASP2,LGMN,NR4A3,HIST1H2BO,CD274,NEK8,MTBP,SMG7,NOP16,ACTB,PUS7L,VMP1,NCAPD3,GDPD4,TAF1,PALD1,MUC4,DLG1,SCUBE2,MLH1,ACO2,NUP35,RTN4,DNAJC14,OXR1,SLC25A36,POU4F1,RRM1,FAN CD2,NID2,METTL13,TUT1,RNASE4,TNXB,BANP,EIF3H,LONP1,GNAT1,STAT5B,TMEM79,ITGA5,DCLRE1C,AP4M1,DCAKD,SPATA5,MTHFD1,PP1L1,TNS4,RNF213,LIMCH1,MPDZ,DNAJC2,NUSAP1,SNRNP200,FANCI,TJAP1,ALG3,RPRD2,TEC,SLC1A3,PAR P14,MEF2B,MCM6,XRN2,TXNRD2,PHF19,NDUFV2,EAF1,ULBP2,CCNB1IP1,RASA2,QTRTD1,LRRRC8A,SREBF1,IGF2BP1,GNB2L1,ROBO1,TRIM41,VCPIP1,NOL8,KNTC1,B2M,OGT,NEDD4,ZCCHC8,MYLPF,GARNL3,C17orf53,AGGF1,C2NA2,NOP58,GREB1L ,ZNF687,HNRNPA2B1,EAF2,B4GALT5,KIAA1211,MGEA5,LYST,PAM,LIN28A,USF3,CDCA3,ESPL1,TRPV4,ONECUT1,INADL,FSTL3,USP1,SGCA,UBXN4,MTMR11,TTTC25,SLC16A6,RUSC2,VPS41,MED19,GNL1,BACE1,DGCR8,CNCL1,COPS7A,TCXTE1D2,RE L,HMMR,UNC13A,MTR,C16orf62,FAF1,LRPPRC,STAT2,LEF1,C14orf80,SEMA6A,SEC31A,CABLES2,HLTF,CNOT1,PRPF3,NUP160,TRIM33,ANK3,AGFG2,DAPK3,DIS3,KIAA0895L,CLCC1,POLE,SLC35B2,NCAN,CLCA2,SERPINE1,CDK5RAP1,LRRK2,DUSP7, NPL,P4HB,BLZF1,IPO5,MAPRE1,TNFSF9,CBL1,SLC29A1,C5orf22,TXNDC16,LDLR,RF1,ZNF837,DDX39B,NUP205,CDKN1A,WDHD1,ZFH4,ARFGEF2,UGGT2,GLYCTK,TMEM116,CLK2,LTBP4,DHRS7B,NUCB2,C2orf196,BRCA1,MRPS18A,FRG2C,FNBP 4,FBXO4,SKOR2,CENPV,CENPH,TRIP10,PTPN2,FAM83A,GLI2,SIRT2,PDHA1,PHLDB1,PCIF1,KIF24,RNGTT,ILF3,PKN2,ICE1,PAN2,TRA2B,KDM6B,WHSC1,CASP8,GPD2,NFE2L2,IL12RB1 |

**Supplemental Table 4: Liver specific functional annotation of genes bound by E2F7/8 in the promoter region**

| IPA Category                            | ChIP-seq | B-H P-value | Molecules                                                                                                                                                                                                                                                                                                                                                                                                                                                                                                                                                                                                                                                                                                                                                                                                                                                                                                                                                                                                                                                                                                                                                                                                                                                                                                                                                                                                                                                                                                                                                                                                                                                                                                                                                                                                                                                                                                                                                                                                                                                                                                                                                                                                                                                                                                                                                                                                                                                                                                                                                                                                                                                                                                                                                                                                                                                                                                                                                                                                                                                                                                                                                                                                                                                                                                                                                                                                                                                                                                                                                                                                                                                                                                                                                                                                                                                                                                                                                                                                                                                                                                                                                                                                                                                                                                                                                                                                                                                                                                                                                                                                                                                                                                                                                                                                                                                                                    |
|-----------------------------------------|----------|-------------|----------------------------------------------------------------------------------------------------------------------------------------------------------------------------------------------------------------------------------------------------------------------------------------------------------------------------------------------------------------------------------------------------------------------------------------------------------------------------------------------------------------------------------------------------------------------------------------------------------------------------------------------------------------------------------------------------------------------------------------------------------------------------------------------------------------------------------------------------------------------------------------------------------------------------------------------------------------------------------------------------------------------------------------------------------------------------------------------------------------------------------------------------------------------------------------------------------------------------------------------------------------------------------------------------------------------------------------------------------------------------------------------------------------------------------------------------------------------------------------------------------------------------------------------------------------------------------------------------------------------------------------------------------------------------------------------------------------------------------------------------------------------------------------------------------------------------------------------------------------------------------------------------------------------------------------------------------------------------------------------------------------------------------------------------------------------------------------------------------------------------------------------------------------------------------------------------------------------------------------------------------------------------------------------------------------------------------------------------------------------------------------------------------------------------------------------------------------------------------------------------------------------------------------------------------------------------------------------------------------------------------------------------------------------------------------------------------------------------------------------------------------------------------------------------------------------------------------------------------------------------------------------------------------------------------------------------------------------------------------------------------------------------------------------------------------------------------------------------------------------------------------------------------------------------------------------------------------------------------------------------------------------------------------------------------------------------------------------------------------------------------------------------------------------------------------------------------------------------------------------------------------------------------------------------------------------------------------------------------------------------------------------------------------------------------------------------------------------------------------------------------------------------------------------------------------------------------------------------------------------------------------------------------------------------------------------------------------------------------------------------------------------------------------------------------------------------------------------------------------------------------------------------------------------------------------------------------------------------------------------------------------------------------------------------------------------------------------------------------------------------------------------------------------------------------------------------------------------------------------------------------------------------------------------------------------------------------------------------------------------------------------------------------------------------------------------------------------------------------------------------------------------------------------------------------------------------------------------------------------------------------------------|
| Liver<br>Hyperplasia/Hyperproliferation | E2F7     | 9.12E-02    | VRK2,POU2F1,RFC3,POLA1,PANK2,FANCC,ABC6,MMAB,RALGAPA2,PDE4DIP,MDC1,DNAJC9-AS1,ZBTB80S,CCNT2,ARGLU1,KITLG,UBE2T,PSMA1,CBX3,PROSER1,CDC27,CFDP1,TP2A,SCUBE2,LEMD3,MLH1,ATAD5,PSMC3IP,DERL3,LTN1,SLC25A36,ANP32E,CDK5RAP3,RRM1,HNRNPA1,FANCD2,HNRNPUL1,CNTRL,BANP,DIAPH3,MCM4,PMAIP1,RECQL,AP4M1,CYR61,PHF20,HEATR6,MTHFD1,EEF1E1,E2F1,PRIM2,NUSAP1,CEP152,SIK2,AK2,PDS5A,RTTN,FANCI,STIL,CCNE1,RFC2,CDC45,SLC1A5,SIN3A,CENPU,MCM6,MAK,DSN1,SRSF1,E1F1AX,POLD3,NASP,PLAUR,TXNRD1,KNTC1,OGT,ATL3,CENPI,CAMTA1,DAXX,PARP1,LUC7L2,NOP58,ZNF687,HAUS8,EAF2,BCL2L12,BAZ1B,YARS,RBM14,MBNL3,ASF1B,CDCA3,PAICS,METTL2B,RRM2,USP1,AP3D1,PPRC1,RCCD1,ZRANB3,CA5BP1,TLL7,PPOX,CASP8AP2,ZCWPW1,VEGFA,TICRR,BIN1,C3orf58,IGF2BP3,HLTF,ADAM15,NUP160,RNF167,ZBTB5,EMSY,MYC,EZH2,AGFG2,DIS3,SUCO,CLCC1,POLE,GMPS,MCM3,MSH2,TRIM26,KIF25,TBC1D1,DCTPP1,IPO5,ATAD2,AP1S2,HSD17B6,BSG,IGSF8,TLL9,SETX,RFX1,DDX39B,LINC00273,METT L2A,E2F8,MSH6,NUP205,E2F2,CDKN1A,RAD51B,RBM23,TBC1D15,TMEM116,CASP2,TTI1,LTPB4,OGG1,SOX6,BCRA1,CUX1,FCHSD2,NUCB2,IRS2,CENPH,CDK2,CD44,WEE1,MMS22L,PRKCSH,ADAL,MUT,NAP1L4,PRDM7,PAN2,SLC25A42,TRA2B,RIC8B,ARHGFE40,GPD2                                                                                                                                                                                                                                                                                                                                                                                                                                                                                                                                                                                                                                                                                                                                                                                                                                                                                                                                                                                                                                                                                                                                                                                                                                                                                                                                                                                                                                                                                                                                                                                                                                                                                                                                                                                                                                                                                                                                                                                                                                                                                                                                                                                                                                                                                                                                                                                                                                                                                                                                                                                                                                                                                                                                                                                                                                                                                                                                                                                                                                                                                                                                                                                                                                                                                                                                                                                                                                                                                                                                                                                                                                                                                                                                                          |
|                                         | E2F8     | 1.53E-03    | VRK2,AUTS2,STK24,ITGA7,CCNT2,ARGLU1,HYDIN,TCHP,PHRF1,NFKBIL1,YOD1,ELL3,DPP3,CBX3,PIAS3,TP2A,EEF1A1,TXNIP,NCOA7,LRRC59,LEMD3,OTUD5,WDR25,DERL3,ENAH,SEMA4B,FOXP1,NRAS,ANP32E,GTPBP3,ZC3H10,WRAP53,NOL6,MAP3K1,SFPQ,ZSWIM3,MAP3K4,SUPT5H,PMAIP1,ZMYND8,RECQL,NUDT1,DLAT,DUSP11,FKBP1A,PRIM2,ERCC5,CNOT3,POLRMT,SIK2,FAIM,PET100,SEC24A,PFN1,FARP1,CLIP1,PPP1R37,CUTA,PER1,RFC2,SIN3A,HK2,DSN1,E1F1AX,EXOSC9,NASP,KCTD2,CEP44,PAN3,HIVEP1,FOXRED1,ARMC5,SKIDA1,TM9SF4,ARID4A,DAXX,PARP1,PTGS2,DCTN4,PTPRE,LUC7L2,DENND1A,CCDC82,ZMYM4,NUP188,RPL7A,TNRC6B,SKA3,TRIM24,TMEM127,RRM2,PALLD,KANSL3,SKP2,ERBB2,ANO6,FBXO9,CBLB,POLQ,PLB1,UMPS,AKR1D1,TMEM237,AHCTF1,SMOX,TMEM209,CLTC,ALDH7A1,IGF2BP3,WNK1,U2SURP,ADAM15,CACYBP,PAWR,KIAA0825,CDK8,EHBP1,IMP2,CDKN1B,SUCO,CCND1,NENF,GMPS,TOR3A,CIC,XPC,TMEM167B,GALNT9,MT2A,FZRL1,DNTTIP2,TAF1A,OSGEPL1,MINOS1-NBL1/NBL1,COASY,IL15RA,ATP1A2,SMARCA5,SETX,ACSL1,METTL2A,MSH6,E2F8,E2F2,RPL37,TROVE2,USP24,QSER1,SLC39A8,PRR5L,FCHSD2,CDK4,TRIM25,VPS45,TLL3,MYO1F,LRRC49,TPR,GABRQ,KMT5A,WEE1,CD44,MSI2,MRPL24,BZW1,RCO R3,TRIM28,ZBTB9,MMS22L,IER5,ABCA4,TMEM55B,CCDC115,ACTR10,KIFC1,MPV17,ARHGAP21,SHC1,EFHC1,POU2F1,ETV1,PANK2,ABC8,SART3,LAMC1,TROAP,LHFP2,MYPOP,C3AR1,ZNF335,ATP11C,MFN2,FAM129B,PHF8,VARS2,CFDP1,PEG10,SREK1IP1,STAP2,ATAD5,PRCC,PSMC3IP,LTN1,TFAP2A,NUMA1,MALAT1,PPP6R2,VCAN,ZCCHC11,GPRIN1,MYOCD,ATF2,CHMP7,HEATR6,MTMR9,RARA,ZFYVE19,KDM4B,OSBPL5,MED31,ARHGFEF12,E2F1,MAFA,CDK17,PPP1R3F,CEP152,HDLBP,BAZ 2A,TP53,ARRB1,C3orf38,ADAM17,LRMP,STIL,CCNE1,CDC45,SLC1A5,RUSC1,CENPU,RTN3,NPM1,PPM1G,TOE1,TCOF1,USP37,DHX8,PLAUR,TXNRD1,WDR24,KHSRP,RXR8,SIL1,CPEB3,CENPI,ZNF181,KBTBD2,ATL3,PDZD2,CLK1,KIAA0907,CAMTA1,FH OD1,BRD4,KPNA6,KAT6B,NUP214,SF3B4,BAZ1B,THOC2,WHSC1L1,TBL1X,C14orf159,PAICS,C2orf44,TRAPP4,JPH2,METTL2B,PABPN1,CCDC22,IQGAP3,TEX10,AP3D1,GORASP2,PPRC1,SRRM1,ABCA10,MRPS28,SPIDR,BRD2,REL,CASP8AP2,N4BP2 L2,MMACHC,PRPF6,PIK3R4,KAT5,NFIB,VPS72,ZBTB5,CCDC12,POLR2M,RRAGB,PSMC5,MCM3,DGKA,MSH2,VEZF1,KCNH4,DID01,HSPD1,ATAD2,AP1S2,BPNT1,NCAPG2,TLL9,COL12A1,LINC00273,TBC1D15,UBE3C,SP4,OGG1,HMGCS1,NFKB1,PRSS 16,MAP3K11,IDH3B,PCNX2,CDK2,UBE2N,TLK1,GLI3,ID3,MED24,IGFLR1,ZNF451,TPCN1,DLGAP1,PRKCSH,GOLPH3,ABC3,TM2D1,ARID4B,ARNTL2,MEF2A,RIC8B,GAS6,STK19,RFC3,COL7A1,POLA1,FANCC,MMAB,EHBP1L1,LAMA3,PDE4DIP,GDI2,MD C1,ZBTB80S,PNISR,WNT2B,ANAPC5,BRMS1L,CFLAR,EXOC1,MARS,HIPK3,HMG81,NCOA6,KITLG,UBE2T,HMG2A,mir-154,SCP2,PSMA1,ZBTB45,MBIP,HOXB6,RIOK3,KPNA1,C9orf84,DARS,NKD2,EVI5L,ANKRD44,CDK5RAP3,HNRNPA1,HNRNPUL1,CNTRL,RBAC,SOC6,HIST1H2B,AGPAT4,DIAPH3,IFI16,MCM4,CIZ1,C2orf81,KIAA0753,ANKRD11,CNNT1,PHF20,FOXP1,NU FIP1,MCM7,BAG6,EEF1E1,ASRGL1,ZCCHC9,CLIC1,AK2,PDS5A,RTTN,HSPA8,PSMC1,NES,E1F4A1,TPX2,UCP2,SENP3,NCOA5,SRSF1,POLD3,NCALD,TFE2L2,KRI1,TMEM230,DHTKD1,NME1,RAD51C,SP1,C12orf73,CEP250,HAUS8,POP5,INTS4,BCL2L12,TF B1M,ITM2B,BHLHE40,YARS,RBM14,FLCN,KLHL28,FOXK1,LRP8,DDX3X,AAAS,RGL2,PHF3,LMNA,DLGAP3,TRAPP9,MPI,SMUG1,CAD,ZRANB3,CA5BP1,PRKCH,WARS,LRRC46,PGAP1,ATP1B3,PPOX,KRT7,ROBO2,SLC7A10,ZCWPW1,DROSHA,TICRR,P TER,POGZ,MECOM,HIST1H3B,C3orf58,HIST1H3F,HIST1H3G,RNF167,CSTF1,TMEM38B,TRAPP5,PMVK,BLM,MYC,EZH2,TRANK1,FBXO11,VCP,WDR81,TRIM26,KIF25,AOAH,DCTPP1,TBP,RBBP5,STK11IP,RNF168,L3MBTL2,CENPA,USP54,INTS5,RNF5, HIST1H2BG,BSG,WDR33,CCDC20B,RAD51B,C1orf112,INPP4A,DENND5A,CASP2,TTI1,ZBTB43,MAP3K7,SGTB,NBR1,SGPL1,TAX1BP1,ATM,PMEL,PEX16,GNL3L,TNFRSF6B,GOLGB1,GANAB,IDE,CHTOP,CIT,TNIP1,APC2,ARHGFEF40,FAM208A,CLASP2,LG MN,NR4A3,HIST1H2BO,CD274,NEK8,MTBP,SMG7,NOP16,ACTB,PUS7L,VMP1,NCAPD3,GDPD4,CYP1B1,TAF1,PALD1,MUC4,DLG1,SCUBE2,MLH1,ACO2,NUP35,RTN4,DNAJC14,OXR1,SLC25A36,POU4F1,RRM1,FANCD2,NID2,METTL13,TUT1,RNASE4,TN XB,BANP,E1F3H,LONP1,GNAT1,STAT5B,TMEM79,ITGA5,DCLRE1C,AP4M1,DCAKD,SPATA5,MTHFD1,PP1L1,TNS4,RNF213,LIMCH1,MPDZ,DNAJC2,NUSAP1,SNRNP200,FANCI,TJAP1,ALG3,RPRD2,TEC,SLC1A3,PARP14,MEF2B,MCM6,XRN2,TXNRD2,PHF 19,NDUFV2,EAF1,ULBP2,CCNB1IP1,HLA-E,RASA2,QTRTD1,LRRC8A,SREBF1,IGF2BP1,GNB2L1,ROBO1,TRIM41,VCPIP1,NOL8,KNTC1,B2M,OGT,NEDD4,ZCCHC8,MYLPF,GARNL3,C17orf53,AGGF1,CCNA2,NOP58,GREB1L,ZNF687,HNRNPA2B1,B4GALT5,EAF2,KIAA1211,MGEA5,LYST,PAM,LIN2 8A,USF3,CDCA3,ESPL1,NQO2,TRPV4,ONECUT1,INADL,FSTL3,USP1,SGCA,UBXN4,MTMR11,TTTC25,SLC16A6,RUSC2,VPS41,MED19,GNL1,MRE11A,BACE1,DGCR8,CCNL1,COPS7A,TCTEX1D2,REL,HMMR,UNCL13A,MTR,C16orf62,FAF1,LRPPRC,STAT2,L EF1,C14orf80,SEMA6A,SEC31A,CABLES2,HLTF,CNOT1,PRPF3,SP1,NUP160,TRIM33,ANK3,AGFG2,DAPK3,DIS3,KIAA0895L,CLCC1,POLE,SLC35B2,NCAN,CLCA2,SERPINE1,CDK5RAP1,LRKK2,DUSP7,NPL,P4HB,PHGDH,BLZF1,IPO5,MAPRE1,TNFSF9,C CBL1,SLC29A1,C5orf22,TXNDC16,LDLR,RFX1,ZNF837,DDX39B,NUP205,WHDH1,CDKN1A,ZFXH4,ARHGFEF2,UGGT2,GLYCTK,TMEM116,CLK2,LTPB4,DHRS7B,NUCB2,C20orf196,BCRA1,MRPS18A,FRG2C,FNBP4,FBXO4,SKOR2,CENPV,CENPH,TRIP10,PT PN2,FAM83A,GLI2,SIRT2,PDHA1,PHLDB1,PCIF1,KIF24,RNGTT,ILF3,PKN2,ICE1,PAN2,TRA2B,KDM6B,WHSC1,CASP8,GPD2,NFE2L2,IL12RB1 |
| Liver<br>Necrosis/Cell<br>Death         | E2F7     | 2.17E-01    | MYC,DAXX,TREX1,CDKN1A,ATP2A1,SLC20A1,E2F1                                                                                                                                                                                                                                                                                                                                                                                                                                                                                                                                                                                                                                                                                                                                                                                                                                                                                                                                                                                                                                                                                                                                                                                                                                                                                                                                                                                                                                                                                                                                                                                                                                                                                                                                                                                                                                                                                                                                                                                                                                                                                                                                                                                                                                                                                                                                                                                                                                                                                                                                                                                                                                                                                                                                                                                                                                                                                                                                                                                                                                                                                                                                                                                                                                                                                                                                                                                                                                                                                                                                                                                                                                                                                                                                                                                                                                                                                                                                                                                                                                                                                                                                                                                                                                                                                                                                                                                                                                                                                                                                                                                                                                                                                                                                                                                                                                                    |
|                                         | E2F8     | 2.68E-03    | ERCC1,ATF2,BBC3,MCL1,TNFRSF1A,ATP2A1,HSPD1,FKBP1A,SLC20A1,E2F1,FADD,CD274,TP53,BIRC3,FAIM,CFLAR,JUND,LDLR,HMG81,NFKBIB,CDKN1A,FXR1,SST,REL,CCR2,NCOA5,NFKB1,MNT,TREX1,IRF3,BMF,TNFRSF6B,TMBIM6,MYC,DAXX,C DKN1B,CCND1,PTGS2,CIT,STAT6,TNIP1,SERPINE1,STK4,SHC1,CASP8,NFE2L2                                                                                                                                                                                                                                                                                                                                                                                                                                                                                                                                                                                                                                                                                                                                                                                                                                                                                                                                                                                                                                                                                                                                                                                                                                                                                                                                                                                                                                                                                                                                                                                                                                                                                                                                                                                                                                                                                                                                                                                                                                                                                                                                                                                                                                                                                                                                                                                                                                                                                                                                                                                                                                                                                                                                                                                                                                                                                                                                                                                                                                                                                                                                                                                                                                                                                                                                                                                                                                                                                                                                                                                                                                                                                                                                                                                                                                                                                                                                                                                                                                                                                                                                                                                                                                                                                                                                                                                                                                                                                                                                                                                                                  |

**Supplemental Table 5: Significantly altered transcripts in E2F7/8 deleted liver tumors vs. wildtype liver identified by RNA sequencing.**

| Gene Symbol | Ensembl ID            | WT mean<br>(n=4) | 78DKO<br>tumor<br>mean<br>(n=4) | Fold<br>change<br>(WT vs.<br>78DKO<br>tumor) | P-value | adjusted P-<br>value |
|-------------|-----------------------|------------------|---------------------------------|----------------------------------------------|---------|----------------------|
| Galp        | ENSMUSG000000034660.7 | 0.0              | 1.4                             | <b>94.3</b>                                  | 0.0003  | 0.0072               |
| Prom2       | ENSMUSG000000027376.9 | 0.5              | 23.1                            | <b>42.7</b>                                  | 0.0001  | 0.0016               |
| Gm4794      | ENSMUSG000000090298.1 | 1.2              | 44.5                            | <b>37.7</b>                                  | 0.0001  | 0.0016               |
| Sult2a6     | ENSMUSG000000070810.3 | 2.0              | 65.2                            | <b>32.3</b>                                  | 0.0002  | 0.0041               |
| Adcy1       | ENSMUSG000000020431.5 | 0.1              | 3.2                             | <b>31.7</b>                                  | 0.0001  | 0.0016               |
| Sult3a1     | ENSMUSG000000069668.2 | 3.5              | 106.6                           | <b>30.1</b>                                  | 0.0001  | 0.0016               |
| Cyp17a1     | ENSMUSG000000003555.7 | 2.2              | 61.6                            | <b>27.9</b>                                  | 0.0001  | 0.0016               |
| Gm14936     | ENSMUSG000000084963.1 | 0.0              | 0.9                             | <b>27.4</b>                                  | 0.0001  | 0.0016               |
| Akr1b7      | ENSMUSG000000052131.7 | 1.2              | 28.7                            | <b>23.2</b>                                  | 0.0001  | 0.0016               |
| Ighv12-3    | ENSMUSG000000076676.1 | 4.6              | 101.8                           | <b>22.1</b>                                  | 0.0001  | 0.0016               |
| Gldn        | ENSMUSG000000046167.5 | 0.6              | 11.8                            | <b>19.7</b>                                  | 0.0001  | 0.0016               |
| Gm11728     | ENSMUSG000000086902.1 | 0.1              | 1.0                             | <b>19.7</b>                                  | 0.0006  | 0.0125               |
| Esm1        | ENSMUSG000000042379.8 | 0.6              | 11.3                            | <b>19.4</b>                                  | 0.0001  | 0.0016               |
| Sult2a4     | ENSMUSG000000074377.4 | 0.2              | 3.4                             | <b>17.7</b>                                  | 0.0013  | 0.0224               |
| Nfe2l3      | ENSMUSG000000029832.9 | 0.1              | 1.9                             | <b>15.7</b>                                  | 0.0001  | 0.0016               |
| Lcn13       | ENSMUSG000000062061.3 | 0.5              | 7.3                             | <b>14.8</b>                                  | 0.0001  | 0.0016               |
| Tuba8       | ENSMUSG000000030137.7 | 0.5              | 7.5                             | <b>14.5</b>                                  | 0.0001  | 0.0016               |
| Wfdc3       | ENSMUSG000000076434.3 | 0.2              | 3.0                             | <b>14.1</b>                                  | 0.0006  | 0.0118               |
| Prom1       | ENSMUSG000000029086.8 | 0.8              | 10.7                            | <b>14.0</b>                                  | 0.0001  | 0.0016               |
| Afp         | ENSMUSG000000054932.3 | 1.4              | 19.5                            | <b>13.7</b>                                  | 0.0001  | 0.0016               |
| Pde6c       | ENSMUSG000000024992.6 | 0.2              | 2.9                             | <b>13.1</b>                                  | 0.0001  | 0.0016               |
| Psg18       | ENSMUSG000000003505.8 | 0.2              | 2.1                             | <b>13.1</b>                                  | 0.0001  | 0.0016               |
| Igkv4-91    | ENSMUSG000000076532.2 | 5.1              | 64.7                            | <b>12.8</b>                                  | 0.0001  | 0.0016               |
| Zfp618      | ENSMUSG000000028358.9 | 0.1              | 1.5                             | <b>12.7</b>                                  | 0.0005  | 0.0110               |
| Chrna4      | ENSMUSG000000027577.8 | 0.4              | 5.1                             | <b>12.6</b>                                  | 0.0001  | 0.0016               |
| Kif5c       | ENSMUSG000000026764.9 | 0.7              | 8.3                             | <b>12.5</b>                                  | 0.0003  | 0.0072               |
| Sult2a2     | ENSMUSG000000070811.4 | 0.7              | 8.6                             | <b>12.3</b>                                  | 0.0020  | 0.0312               |
| Boll        | ENSMUSG000000025977.9 | 0.1              | 1.1                             | <b>12.1</b>                                  | 0.0001  | 0.0016               |
| Mab21l3     | ENSMUSG000000044313.7 | 0.1              | 1.7                             | <b>11.5</b>                                  | 0.0001  | 0.0016               |
| Igfbp1      | ENSMUSG000000020429.7 | 17.5             | 196.9                           | <b>11.2</b>                                  | 0.0001  | 0.0016               |
| Akr1c18     | ENSMUSG000000021214.7 | 1.6              | 17.3                            | <b>11.0</b>                                  | 0.0001  | 0.0016               |
| Usp43       | ENSMUSG000000020905.5 | 0.1              | 0.8                             | <b>10.9</b>                                  | 0.0012  | 0.0210               |
| Tlr1        | ENSMUSG000000044827.6 | 0.7              | 7.1                             | <b>10.9</b>                                  | 0.0001  | 0.0016               |
| Stc1        | ENSMUSG000000014813.7 | 0.1              | 1.4                             | <b>10.8</b>                                  | 0.0001  | 0.0016               |
| Ipcf1       | ENSMUSG000000064065.8 | 0.2              | 2.0                             | <b>10.8</b>                                  | 0.0001  | 0.0016               |
| Cdhr2       | ENSMUSG000000034918.8 | 0.3              | 3.5                             | <b>10.7</b>                                  | 0.0001  | 0.0016               |
| Tinag       | ENSMUSG000000032357.5 | 0.2              | 1.9                             | <b>10.7</b>                                  | 0.0018  | 0.0293               |

**Supplemental Table 5: Significantly altered transcripts in E2F7/8 deleted liver tumors vs. wildtype liver identified by RNA sequencing.**

| Gene Symbol   | Ensembl ID           | WT mean<br>(n=4) | 78DKO<br>tumor<br>mean<br>(n=4) | Fold<br>change<br>(WT vs.<br>78DKO<br>tumor) | P-value | adjusted P-<br>value |
|---------------|----------------------|------------------|---------------------------------|----------------------------------------------|---------|----------------------|
| Lpl           | ENSMUSG00000015568.8 | 8.9              | 87.8                            | <b>9.8</b>                                   | 0.0001  | 0.0016               |
| Nid1          | ENSMUSG00000005397.7 | 3.6              | 35.8                            | <b>9.8</b>                                   | 0.0001  | 0.0016               |
| Sult2a5       | ENSMUSG00000078799.2 | 0.3              | 3.2                             | <b>9.8</b>                                   | 0.0032  | 0.0450               |
| Atp10a        | ENSMUSG00000025324.6 | 0.2              | 2.2                             | <b>9.7</b>                                   | 0.0001  | 0.0029               |
| Mtmr11        | ENSMUSG00000045934.9 | 2.0              | 18.3                            | <b>9.3</b>                                   | 0.0001  | 0.0016               |
| Cpe           | ENSMUSG00000037852.7 | 3.0              | 27.8                            | <b>9.3</b>                                   | 0.0001  | 0.0016               |
| Cldnd2        | ENSMUSG00000038973.1 | 0.1              | 1.3                             | <b>9.1</b>                                   | 0.0002  | 0.0051               |
| Tff3          | ENSMUSG00000024029.4 | 22.4             | 202.9                           | <b>9.1</b>                                   | 0.0001  | 0.0016               |
| Nupr1         | ENSMUSG00000030717.3 | 1.1              | 10.3                            | <b>9.1</b>                                   | 0.0001  | 0.0016               |
| 1700055N04Rik | ENSMUSG00000037263.6 | 0.2              | 1.7                             | <b>8.9</b>                                   | 0.0017  | 0.0276               |
| Sparcl1       | ENSMUSG00000029309.3 | 0.5              | 4.8                             | <b>8.9</b>                                   | 0.0001  | 0.0016               |
| Col4a3        | ENSMUSG00000079465.2 | 0.1              | 1.0                             | <b>8.9</b>                                   | 0.0014  | 0.0237               |
| Pnpla5        | ENSMUSG00000018868.3 | 0.2              | 1.5                             | <b>8.8</b>                                   | 0.0002  | 0.0041               |
| Klrb1c        | ENSMUSG00000030325.9 | 0.2              | 1.5                             | <b>8.8</b>                                   | 0.0001  | 0.0016               |
| Igdcc4        | ENSMUSG00000032816.8 | 0.4              | 3.4                             | <b>8.6</b>                                   | 0.0001  | 0.0016               |
| Pls1          | ENSMUSG00000049493.7 | 0.7              | 6.4                             | <b>8.6</b>                                   | 0.0001  | 0.0016               |
| Pnpla3        | ENSMUSG00000041653.4 | 0.9              | 7.4                             | <b>8.6</b>                                   | 0.0001  | 0.0016               |
| Itih5         | ENSMUSG00000025780.7 | 0.5              | 4.0                             | <b>8.6</b>                                   | 0.0001  | 0.0016               |
| Dhrs9         | ENSMUSG00000027068.6 | 0.3              | 2.9                             | <b>8.5</b>                                   | 0.0001  | 0.0016               |
| Nt5e          | ENSMUSG00000032420.6 | 1.7              | 14.2                            | <b>8.4</b>                                   | 0.0001  | 0.0016               |
| Hr            | ENSMUSG00000022096.8 | 0.1              | 0.8                             | <b>8.4</b>                                   | 0.0002  | 0.0041               |
| Atf3          | ENSMUSG00000026628.8 | 1.3              | 10.9                            | <b>8.2</b>                                   | 0.0001  | 0.0016               |
| Prss8         | ENSMUSG00000030800.8 | 2.1              | 17.1                            | <b>8.1</b>                                   | 0.0001  | 0.0029               |
| C87414        | ENSMUSG00000070686.4 | 0.2              | 1.5                             | <b>8.0</b>                                   | 0.0001  | 0.0016               |
| Gm5648        | ENSMUSG00000083668.1 | 0.3              | 2.4                             | <b>8.0</b>                                   | 0.0001  | 0.0016               |
| Fabp4         | ENSMUSG00000062515.2 | 5.9              | 45.3                            | <b>7.7</b>                                   | 0.0001  | 0.0016               |
| Kcne3         | ENSMUSG00000035165.6 | 0.2              | 1.6                             | <b>7.6</b>                                   | 0.0004  | 0.0091               |
| Pygb          | ENSMUSG00000033059.7 | 2.6              | 19.9                            | <b>7.6</b>                                   | 0.0001  | 0.0016               |
| Chka          | ENSMUSG00000024843.9 | 8.3              | 62.8                            | <b>7.6</b>                                   | 0.0001  | 0.0016               |
| Ccdc120       | ENSMUSG00000031150.6 | 1.4              | 10.5                            | <b>7.6</b>                                   | 0.0008  | 0.0149               |
| Gm2399        | ENSMUSG00000078141.2 | 8.2              | 60.6                            | <b>7.4</b>                                   | 0.0001  | 0.0016               |
| Grhl1         | ENSMUSG00000020656.9 | 0.4              | 3.0                             | <b>7.4</b>                                   | 0.0001  | 0.0016               |
| Klrb1b        | ENSMUSG00000079298.3 | 0.8              | 5.6                             | <b>7.4</b>                                   | 0.0031  | 0.0439               |
| Apoa4         | ENSMUSG00000032080.6 | 228.5            | 1685.2                          | <b>7.4</b>                                   | 0.0006  | 0.0125               |
| Mki67         | ENSMUSG00000031004.7 | 0.1              | 1.0                             | <b>7.4</b>                                   | 0.0001  | 0.0016               |
| Angpt2        | ENSMUSG00000031465.6 | 0.3              | 1.9                             | <b>7.3</b>                                   | 0.0030  | 0.0434               |
| Rhbg          | ENSMUSG00000001417.4 | 4.7              | 34.3                            | <b>7.3</b>                                   | 0.0001  | 0.0016               |

**Supplemental Table 5: Significantly altered transcripts in E2F7/8 deleted liver tumors vs. wildtype liver identified by RNA sequencing.**

| Gene Symbol   | Ensembl ID            | WT mean<br>(n=4) | 78DKO<br>tumor<br>mean<br>(n=4) | Fold<br>change<br>(WT vs.<br>78DKO<br>tumor) | P-value | adjusted P-<br>value |
|---------------|-----------------------|------------------|---------------------------------|----------------------------------------------|---------|----------------------|
| Phlda2        | ENSMUSG00000010760.4  | 0.5              | 3.3                             | <b>7.2</b>                                   | 0.0001  | 0.0029               |
| Plxna3        | ENSMUSG000000031398.6 | 0.4              | 2.7                             | <b>7.1</b>                                   | 0.0003  | 0.0072               |
| Cdh1          | ENSMUSG00000000303.6  | 4.8              | 33.9                            | <b>7.1</b>                                   | 0.0001  | 0.0016               |
| Nptx1         | ENSMUSG000000025582.4 | 0.1              | 0.9                             | <b>7.1</b>                                   | 0.0001  | 0.0016               |
| Gm12387       | ENSMUSG000000084220.1 | 0.2              | 1.3                             | <b>7.0</b>                                   | 0.0022  | 0.0343               |
| Arntl         | ENSMUSG000000055116.6 | 0.9              | 6.0                             | <b>7.0</b>                                   | 0.0002  | 0.0041               |
| Hao2          | ENSMUSG000000027870.7 | 1.3              | 8.9                             | <b>6.9</b>                                   | 0.0001  | 0.0016               |
| Tubb2a        | ENSMUSG000000058672.6 | 14.0             | 95.5                            | <b>6.8</b>                                   | 0.0001  | 0.0016               |
| Ifi2712b      | ENSMUSG000000021208.8 | 6.4              | 43.8                            | <b>6.8</b>                                   | 0.0001  | 0.0016               |
| Dusp5         | ENSMUSG000000034765.6 | 0.7              | 4.9                             | <b>6.8</b>                                   | 0.0001  | 0.0016               |
| Wfdc15b       | ENSMUSG000000018211.6 | 2.7              | 18.2                            | <b>6.8</b>                                   | 0.0001  | 0.0016               |
| Cib3          | ENSMUSG000000074240.3 | 1.1              | 7.6                             | <b>6.8</b>                                   | 0.0001  | 0.0016               |
| Pkmyt1        | ENSMUSG000000023908.7 | 0.2              | 1.5                             | <b>6.8</b>                                   | 0.0011  | 0.0203               |
| Esco2         | ENSMUSG000000022034.9 | 0.4              | 2.5                             | <b>6.7</b>                                   | 0.0001  | 0.0016               |
| Btg2          | ENSMUSG000000020423.6 | 3.2              | 21.4                            | <b>6.7</b>                                   | 0.0001  | 0.0016               |
| Asb11         | ENSMUSG000000031382.8 | 0.2              | 1.1                             | <b>6.7</b>                                   | 0.0028  | 0.0411               |
| Scd2          | ENSMUSG000000025203.5 | 9.4              | 63.2                            | <b>6.7</b>                                   | 0.0001  | 0.0016               |
| Scn8a         | ENSMUSG000000023033.7 | 0.3              | 2.1                             | <b>6.5</b>                                   | 0.0001  | 0.0016               |
| Hcn2          | ENSMUSG000000020331.3 | 0.2              | 1.0                             | <b>6.5</b>                                   | 0.0001  | 0.0016               |
| 9330182L06Rik | ENSMUSG000000056004.9 | 0.2              | 1.3                             | <b>6.5</b>                                   | 0.0026  | 0.0389               |
| Abcc4         | ENSMUSG000000032849.7 | 0.8              | 5.2                             | <b>6.4</b>                                   | 0.0001  | 0.0016               |
| Tnfsf13       | ENSMUSG000000089669.1 | 2.9              | 18.4                            | <b>6.4</b>                                   | 0.0024  | 0.0362               |
| Ccdc164       | ENSMUSG000000073102.2 | 0.4              | 2.3                             | <b>6.3</b>                                   | 0.0001  | 0.0016               |
| Sult1e1       | ENSMUSG000000029272.7 | 2.2              | 13.6                            | <b>6.2</b>                                   | 0.0001  | 0.0016               |
| Inpp5j        | ENSMUSG000000034570.5 | 0.1              | 0.7                             | <b>6.1</b>                                   | 0.0001  | 0.0016               |
| Ly6d          | ENSMUSG000000034634.6 | 3.7              | 22.4                            | <b>6.1</b>                                   | 0.0001  | 0.0016               |
| Sult2a1       | ENSMUSG000000078798.2 | 0.7              | 4.0                             | <b>6.1</b>                                   | 0.0015  | 0.0255               |
| Anxa5         | ENSMUSG000000027712.8 | 20.0             | 121.0                           | <b>6.0</b>                                   | 0.0001  | 0.0016               |
| Galnt6        | ENSMUSG000000037280.6 | 0.9              | 5.3                             | <b>6.0</b>                                   | 0.0001  | 0.0016               |
| Ngp           | ENSMUSG000000032484.6 | 0.3              | 2.1                             | <b>6.0</b>                                   | 0.0001  | 0.0016               |
| Pkp1          | ENSMUSG000000026413.6 | 0.2              | 1.1                             | <b>6.0</b>                                   | 0.0024  | 0.0362               |
| Hmmr          | ENSMUSG000000020330.8 | 0.2              | 1.4                             | <b>5.9</b>                                   | 0.0001  | 0.0016               |
| Ccna2         | ENSMUSG000000027715.3 | 1.0              | 6.2                             | <b>5.9</b>                                   | 0.0017  | 0.0282               |
| Phgdh         | ENSMUSG000000053398.5 | 0.6              | 3.3                             | <b>5.8</b>                                   | 0.0001  | 0.0016               |
| Car2          | ENSMUSG000000027562.7 | 2.4              | 13.9                            | <b>5.7</b>                                   | 0.0001  | 0.0016               |
| Serpine1      | ENSMUSG000000037411.4 | 2.7              | 15.5                            | <b>5.7</b>                                   | 0.0001  | 0.0016               |
| Kif19a        | ENSMUSG000000010021.7 | 0.3              | 1.9                             | <b>5.6</b>                                   | 0.0005  | 0.0110               |

**Supplemental Table 5: Significantly altered transcripts in E2F7/8 deleted liver tumors vs. wildtype liver identified by RNA sequencing.**

| Gene Symbol   | Ensembl ID           | WT mean<br>(n=4) | 78DKO<br>tumor<br>mean<br>(n=4) | Fold<br>change<br>(WT vs.<br>78DKO<br>tumor) | P-value | adjusted P-<br>value |
|---------------|----------------------|------------------|---------------------------------|----------------------------------------------|---------|----------------------|
| Tc2n          | ENSMUSG00000021187.8 | 0.3              | 1.7                             | <b>5.6</b>                                   | 0.0007  | 0.0141               |
| Aebp1         | ENSMUSG00000020473.7 | 0.9              | 4.8                             | <b>5.6</b>                                   | 0.0001  | 0.0016               |
| Uap1l1        | ENSMUSG00000026956.9 | 9.2              | 50.3                            | <b>5.4</b>                                   | 0.0001  | 0.0016               |
| Sprr1a        | ENSMUSG00000050359.6 | 2.1              | 11.1                            | <b>5.4</b>                                   | 0.0001  | 0.0016               |
| Gm10567       | ENSMUSG00000073738.2 | 0.6              | 3.5                             | <b>5.4</b>                                   | 0.0001  | 0.0016               |
| Rims4         | ENSMUSG00000035226.5 | 1.3              | 7.2                             | <b>5.4</b>                                   | 0.0001  | 0.0016               |
| Nuf2          | ENSMUSG00000026683.7 | 0.2              | 1.2                             | <b>5.3</b>                                   | 0.0004  | 0.0082               |
| Lysmd2        | ENSMUSG00000032184.4 | 0.3              | 1.5                             | <b>5.3</b>                                   | 0.0005  | 0.0100               |
| Pdk4          | ENSMUSG00000019577.4 | 0.9              | 4.9                             | <b>5.3</b>                                   | 0.0001  | 0.0016               |
| Slc1a4        | ENSMUSG00000020142.6 | 1.7              | 8.8                             | <b>5.3</b>                                   | 0.0001  | 0.0016               |
| Tspan8        | ENSMUSG00000034127.7 | 5.3              | 28.2                            | <b>5.3</b>                                   | 0.0001  | 0.0016               |
| Cd36          | ENSMUSG00000002944.8 | 7.0              | 37.3                            | <b>5.3</b>                                   | 0.0001  | 0.0016               |
| Ptgrn         | ENSMUSG00000027864.7 | 0.8              | 4.1                             | <b>5.3</b>                                   | 0.0001  | 0.0016               |
| Klk1b1        | ENSMUSG00000063133.2 | 0.3              | 1.8                             | <b>5.3</b>                                   | 0.0004  | 0.0082               |
| Tnfrsf10b     | ENSMUSG00000022074.5 | 0.3              | 1.6                             | <b>5.3</b>                                   | 0.0004  | 0.0082               |
| Tubb2b        | ENSMUSG00000045136.5 | 2.9              | 15.2                            | <b>5.3</b>                                   | 0.0001  | 0.0016               |
| Ccdc69        | ENSMUSG00000049588.7 | 0.2              | 1.2                             | <b>5.2</b>                                   | 0.0004  | 0.0082               |
| Tfrc          | ENSMUSG00000022797.9 | 4.3              | 22.5                            | <b>5.2</b>                                   | 0.0001  | 0.0016               |
| Apln          | ENSMUSG00000037010.7 | 0.6              | 3.1                             | <b>5.2</b>                                   | 0.0001  | 0.0016               |
| Klk1b4        | ENSMUSG00000066513.4 | 1.3              | 6.5                             | <b>5.1</b>                                   | 0.0001  | 0.0016               |
| Slc34a2       | ENSMUSG00000029188.8 | 0.4              | 2.2                             | <b>5.1</b>                                   | 0.0001  | 0.0016               |
| Vill          | ENSMUSG00000038775.8 | 0.7              | 3.5                             | <b>5.1</b>                                   | 0.0006  | 0.0118               |
| Birc5         | ENSMUSG00000017716.8 | 1.0              | 5.2                             | <b>5.1</b>                                   | 0.0001  | 0.0016               |
| Rbp1          | ENSMUSG00000046402.9 | 6.0              | 30.0                            | <b>5.0</b>                                   | 0.0001  | 0.0016               |
| Ppl           | ENSMUSG00000039457.3 | 1.4              | 6.9                             | <b>5.0</b>                                   | 0.0001  | 0.0016               |
| 1700009P17Rik | ENSMUSG00000026649.8 | 0.3              | 1.6                             | <b>5.0</b>                                   | 0.0009  | 0.0165               |
| Plk1          | ENSMUSG00000030867.6 | 0.3              | 1.4                             | <b>5.0</b>                                   | 0.0001  | 0.0016               |
| Ly6c1         | ENSMUSG00000079018.3 | 2.8              | 13.8                            | <b>4.9</b>                                   | 0.0001  | 0.0016               |
| Pycr1         | ENSMUSG00000025140.9 | 0.5              | 2.2                             | <b>4.8</b>                                   | 0.0002  | 0.0041               |
| Cdkn1a        | ENSMUSG00000023067.7 | 3.9              | 18.6                            | <b>4.7</b>                                   | 0.0001  | 0.0016               |
| Sh3bp4        | ENSMUSG00000036206.6 | 0.4              | 1.8                             | <b>4.7</b>                                   | 0.0001  | 0.0016               |
| Cd63          | ENSMUSG00000025351.7 | 13.7             | 64.5                            | <b>4.7</b>                                   | 0.0001  | 0.0016               |
| Golm1         | ENSMUSG00000021556.5 | 1.3              | 6.2                             | <b>4.7</b>                                   | 0.0001  | 0.0016               |
| Fam110c       | ENSMUSG00000036136.8 | 0.2              | 1.0                             | <b>4.7</b>                                   | 0.0001  | 0.0016               |
| Slc39a4       | ENSMUSG00000063354.5 | 13.4             | 62.8                            | <b>4.7</b>                                   | 0.0001  | 0.0016               |
| Meox1         | ENSMUSG00000001493.9 | 0.2              | 1.0                             | <b>4.7</b>                                   | 0.0003  | 0.0072               |
| Hist2h3c2     | ENSMUSG00000081058.2 | 0.4              | 2.0                             | <b>4.6</b>                                   | 0.0002  | 0.0051               |

**Supplemental Table 5: Significantly altered transcripts in E2F7/8 deleted liver tumors vs. wildtype liver identified by RNA sequencing.**

| Gene Symbol | Ensembl ID             | WT mean<br>(n=4) | 78DKO<br>tumor<br>mean<br>(n=4) | Fold<br>change<br>(WT vs.<br>78DKO<br>tumor) | P-value | adjusted P-<br>value |
|-------------|------------------------|------------------|---------------------------------|----------------------------------------------|---------|----------------------|
| Gm13998     | ENSMUSG000000081056.1  | 2.2              | 10.2                            | <b>4.6</b>                                   | 0.0007  | 0.0141               |
| Lyve1       | ENSMUSG000000030787.3  | 0.8              | 3.6                             | <b>4.6</b>                                   | 0.0001  | 0.0016               |
| Mcam        | ENSMUSG000000032135.8  | 1.4              | 6.4                             | <b>4.6</b>                                   | 0.0001  | 0.0016               |
| Cdca5       | ENSMUSG000000024791.4  | 0.4              | 1.7                             | <b>4.6</b>                                   | 0.0001  | 0.0016               |
| Slc22a26    | ENSMUSG000000053303.8  | 4.5              | 20.6                            | <b>4.5</b>                                   | 0.0001  | 0.0016               |
| U1          | ENSMUSG000000075736.1  | 20.5             | 92.9                            | <b>4.5</b>                                   | 0.0003  | 0.0062               |
| Gm7334      | ENSMUSG000000044645.6  | 2.2              | 10.1                            | <b>4.5</b>                                   | 0.0001  | 0.0016               |
| Slc5a1      | ENSMUSG000000011034.3  | 1.0              | 4.4                             | <b>4.5</b>                                   | 0.0001  | 0.0016               |
| Cdca2       | ENSMUSG000000048922.10 | 0.3              | 1.3                             | <b>4.5</b>                                   | 0.0008  | 0.0149               |
| Anxa2       | ENSMUSG000000032231.8  | 28.2             | 125.8                           | <b>4.5</b>                                   | 0.0001  | 0.0016               |
| U2          | ENSMUSG000000065820.1  | 63.1             | 281.6                           | <b>4.5</b>                                   | 0.0001  | 0.0016               |
| Gm14328     | ENSMUSG000000082401.1  | 19.9             | 88.2                            | <b>4.4</b>                                   | 0.0014  | 0.0237               |
| Fam198a     | ENSMUSG000000038233.7  | 0.7              | 3.1                             | <b>4.4</b>                                   | 0.0001  | 0.0016               |
| Sybu        | ENSMUSG000000022340.7  | 0.3              | 1.2                             | <b>4.4</b>                                   | 0.0018  | 0.0293               |
| Cd200       | ENSMUSG000000022661.8  | 2.6              | 11.5                            | <b>4.4</b>                                   | 0.0025  | 0.0378               |
| U2          | ENSMUSG000000065944.1  | 59.1             | 257.7                           | <b>4.4</b>                                   | 0.0001  | 0.0016               |
| Neu3        | ENSMUSG000000035239.6  | 0.6              | 2.7                             | <b>4.3</b>                                   | 0.0001  | 0.0016               |
| Dlx4        | ENSMUSG000000020871.7  | 0.2              | 1.1                             | <b>4.3</b>                                   | 0.0015  | 0.0255               |
| Rcan2       | ENSMUSG000000039601.8  | 3.7              | 15.8                            | <b>4.3</b>                                   | 0.0001  | 0.0016               |
| Plat        | ENSMUSG000000031538.5  | 0.8              | 3.4                             | <b>4.3</b>                                   | 0.0001  | 0.0016               |
| Fst         | ENSMUSG000000021765.6  | 1.6              | 6.8                             | <b>4.3</b>                                   | 0.0001  | 0.0016               |
| Ces2c       | ENSMUSG000000061825.3  | 21.8             | 92.3                            | <b>4.2</b>                                   | 0.0001  | 0.0016               |
| Fabp5       | ENSMUSG000000027533.9  | 14.3             | 60.3                            | <b>4.2</b>                                   | 0.0001  | 0.0016               |
| Chrm3       | ENSMUSG000000046159.8  | 0.7              | 2.8                             | <b>4.2</b>                                   | 0.0001  | 0.0016               |
| Rhoc        | ENSMUSG000000002233.6  | 14.7             | 61.8                            | <b>4.2</b>                                   | 0.0001  | 0.0016               |
| Mpzl1       | ENSMUSG000000026566.9  | 1.0              | 4.3                             | <b>4.2</b>                                   | 0.0001  | 0.0016               |
| Prc1        | ENSMUSG000000038943.9  | 1.3              | 5.4                             | <b>4.2</b>                                   | 0.0001  | 0.0016               |
| Loxl4       | ENSMUSG000000025185.7  | 0.3              | 1.1                             | <b>4.2</b>                                   | 0.0027  | 0.0400               |
| Glns-ps1    | ENSMUSG000000082100.1  | 151.1            | 631.5                           | <b>4.2</b>                                   | 0.0002  | 0.0041               |
| Slc1a5      | ENSMUSG000000001918.10 | 2.4              | 9.9                             | <b>4.2</b>                                   | 0.0001  | 0.0016               |
| Gm447       | ENSMUSG000000045790.4  | 0.4              | 1.6                             | <b>4.2</b>                                   | 0.0011  | 0.0203               |
| Kazald1     | ENSMUSG000000025213.5  | 0.5              | 1.9                             | <b>4.1</b>                                   | 0.0001  | 0.0029               |
| Cdkn2c      | ENSMUSG000000028551.8  | 2.7              | 11.0                            | <b>4.1</b>                                   | 0.0001  | 0.0016               |
| Shc2        | ENSMUSG000000020312.5  | 0.3              | 1.1                             | <b>4.1</b>                                   | 0.0001  | 0.0016               |
| Icosl       | ENSMUSG000000000732.7  | 0.3              | 1.1                             | <b>4.1</b>                                   | 0.0006  | 0.0125               |
| Mmp13       | ENSMUSG000000050578.9  | 0.4              | 1.4                             | <b>4.1</b>                                   | 0.0004  | 0.0082               |
| Ccdc88c     | ENSMUSG000000021182.7  | 0.2              | 0.8                             | <b>4.1</b>                                   | 0.0002  | 0.0041               |



**Supplemental Table 5: Significantly altered transcripts in E2F7/8 deleted liver tumors vs. wildtype liver identified by RNA sequencing.**

| Gene Symbol | Ensembl ID             | WT mean<br>(n=4) | 78DKO<br>tumor<br>mean<br>(n=4) | Fold<br>change<br>(WT vs.<br>78DKO<br>tumor) | P-value | adjusted P-<br>value |
|-------------|------------------------|------------------|---------------------------------|----------------------------------------------|---------|----------------------|
| Uhrf1       | ENSMUSG00000001228.8   | 3.2              | 12.8                            | <b>4.0</b>                                   | 0.0003  | 0.0062               |
| U2          | ENSMUSG000000064682.1  | 18.4             | 74.4                            | <b>4.0</b>                                   | 0.0001  | 0.0029               |
| Pak6        | ENSMUSG000000074923.4  | 0.4              | 1.5                             | <b>4.0</b>                                   | 0.0023  | 0.0357               |
| Ier3        | ENSMUSG000000003541.6  | 0.3              | 1.4                             | <b>4.0</b>                                   | 0.0002  | 0.0041               |
| Nfe2        | ENSMUSG000000058794.6  | 2.4              | 9.7                             | <b>4.0</b>                                   | 0.0001  | 0.0016               |
| Cyp2a4      | ENSMUSG000000074254.3  | 170.0            | 682.6                           | <b>4.0</b>                                   | 0.0001  | 0.0016               |
| Emcn        | ENSMUSG000000054690.10 | 1.3              | 5.1                             | <b>4.0</b>                                   | 0.0001  | 0.0016               |
| Galnt12     | ENSMUSG000000021903.5  | 0.4              | 1.5                             | <b>4.0</b>                                   | 0.0001  | 0.0016               |
| Dntt        | ENSMUSG000000025014.6  | 0.8              | 3.3                             | <b>4.0</b>                                   | 0.0005  | 0.0100               |
| Acacb       | ENSMUSG000000042010.10 | 2.4              | 9.4                             | <b>3.9</b>                                   | 0.0001  | 0.0016               |
| Tnfrsf12a   | ENSMUSG000000023905.8  | 4.4              | 17.4                            | <b>3.9</b>                                   | 0.0010  | 0.0189               |
| Arhgef2     | ENSMUSG000000028059.7  | 1.3              | 5.0                             | <b>3.9</b>                                   | 0.0001  | 0.0016               |
| Psrc1       | ENSMUSG000000068744.6  | 0.5              | 1.8                             | <b>3.9</b>                                   | 0.0001  | 0.0016               |
| Cd34        | ENSMUSG000000016494.3  | 1.7              | 6.7                             | <b>3.9</b>                                   | 0.0003  | 0.0072               |
| Fam83f      | ENSMUSG000000022408.5  | 0.5              | 2.1                             | <b>3.9</b>                                   | 0.0001  | 0.0016               |
| Tmem71      | ENSMUSG000000036944.5  | 1.6              | 6.1                             | <b>3.8</b>                                   | 0.0001  | 0.0016               |
| Dll4        | ENSMUSG000000027314.6  | 0.6              | 2.3                             | <b>3.8</b>                                   | 0.0001  | 0.0016               |
| Mrgpre      | ENSMUSG000000048965.8  | 0.4              | 1.5                             | <b>3.8</b>                                   | 0.0001  | 0.0016               |
| Slc41a3     | ENSMUSG000000030089.9  | 1.5              | 5.8                             | <b>3.8</b>                                   | 0.0001  | 0.0016               |
| Rrm2        | ENSMUSG000000020649.5  | 6.6              | 24.9                            | <b>3.8</b>                                   | 0.0001  | 0.0016               |
| AC110211.1  | ENSMUSG000000092920.1  | 3.3              | 12.5                            | <b>3.8</b>                                   | 0.0018  | 0.0293               |
| U2          | ENSMUSG000000064856.1  | 71.0             | 266.6                           | <b>3.8</b>                                   | 0.0001  | 0.0016               |
| Bex1        | ENSMUSG000000050071.8  | 0.7              | 2.5                             | <b>3.8</b>                                   | 0.0006  | 0.0125               |
| Gm15428     | ENSMUSG000000046057.4  | 2.5              | 9.4                             | <b>3.7</b>                                   | 0.0015  | 0.0255               |
| Cyp2b23     | ENSMUSG000000040650.8  | 0.2              | 0.7                             | <b>3.7</b>                                   | 0.0012  | 0.0210               |
| Atp6v0d2    | ENSMUSG000000028238.6  | 3.8              | 14.1                            | <b>3.7</b>                                   | 0.0001  | 0.0016               |
| Gdpd1       | ENSMUSG000000061666.6  | 1.4              | 5.2                             | <b>3.7</b>                                   | 0.0001  | 0.0016               |
| Cd93        | ENSMUSG000000027435.8  | 1.1              | 4.2                             | <b>3.7</b>                                   | 0.0001  | 0.0016               |
| Smoc2       | ENSMUSG000000023886.8  | 3.6              | 13.4                            | <b>3.7</b>                                   | 0.0001  | 0.0016               |
| Cep55       | ENSMUSG000000024989.8  | 0.3              | 1.0                             | <b>3.7</b>                                   | 0.0005  | 0.0100               |
| Kcnj2       | ENSMUSG000000041695.2  | 0.3              | 1.3                             | <b>3.7</b>                                   | 0.0001  | 0.0016               |
| Spon2       | ENSMUSG000000037379.4  | 2.8              | 10.3                            | <b>3.7</b>                                   | 0.0001  | 0.0016               |
| Slfn9       | ENSMUSG000000069793.5  | 1.3              | 4.7                             | <b>3.7</b>                                   | 0.0001  | 0.0016               |
| Bcmo1       | ENSMUSG000000031845.8  | 5.6              | 20.6                            | <b>3.7</b>                                   | 0.0001  | 0.0016               |
| Igfbp3      | ENSMUSG000000020427.5  | 12.0             | 44.1                            | <b>3.7</b>                                   | 0.0001  | 0.0016               |
| Gm11223     | ENSMUSG000000046341.4  | 6.2              | 22.6                            | <b>3.7</b>                                   | 0.0001  | 0.0016               |
| Lhx6        | ENSMUSG000000026890.11 | 1.7              | 6.2                             | <b>3.7</b>                                   | 0.0001  | 0.0016               |

**Supplemental Table 5: Significantly altered transcripts in E2F7/8 deleted liver tumors vs. wildtype liver identified by RNA sequencing.**

| Gene Symbol | Ensembl ID             | WT mean<br>(n=4) | 78DKO<br>tumor<br>mean<br>(n=4) | Fold<br>change<br>(WT vs.<br>78DKO<br>tumor) | P-value | adjusted P-<br>value |
|-------------|------------------------|------------------|---------------------------------|----------------------------------------------|---------|----------------------|
| U2          | ENSMUSG00000064702.1   | 73.1             | 267.8                           | <b>3.7</b>                                   | 0.0001  | 0.0016               |
| Ddr1        | ENSMUSG00000003534.10  | 1.1              | 3.9                             | <b>3.6</b>                                   | 0.0013  | 0.0230               |
| Hexa        | ENSMUSG00000025232.6   | 11.1             | 40.2                            | <b>3.6</b>                                   | 0.0001  | 0.0016               |
| Ankrd13b    | ENSMUSG000000037907.9  | 0.5              | 1.9                             | <b>3.6</b>                                   | 0.0008  | 0.0157               |
| Cdk1        | ENSMUSG000000019942.6  | 5.3              | 19.1                            | <b>3.6</b>                                   | 0.0001  | 0.0029               |
| U2          | ENSMUSG000000065251.1  | 76.0             | 270.2                           | <b>3.6</b>                                   | 0.0001  | 0.0016               |
| Fmo3        | ENSMUSG000000026691.8  | 10.2             | 36.2                            | <b>3.6</b>                                   | 0.0001  | 0.0016               |
| Unc13b      | ENSMUSG000000028456.10 | 1.8              | 6.5                             | <b>3.5</b>                                   | 0.0001  | 0.0016               |
| Dscc1       | ENSMUSG000000022422.7  | 0.2              | 0.7                             | <b>3.5</b>                                   | 0.0023  | 0.0357               |
| Aurkb       | ENSMUSG000000020897.6  | 0.6              | 2.1                             | <b>3.5</b>                                   | 0.0006  | 0.0118               |
| Lrfn3       | ENSMUSG000000036957.7  | 0.8              | 2.8                             | <b>3.5</b>                                   | 0.0001  | 0.0016               |
| Nrarp       | ENSMUSG000000078202.2  | 0.2              | 0.8                             | <b>3.5</b>                                   | 0.0002  | 0.0051               |
| Top2a       | ENSMUSG000000020914.10 | 0.9              | 3.0                             | <b>3.5</b>                                   | 0.0001  | 0.0029               |
| Pdzk1ip1    | ENSMUSG000000028716.8  | 3.7              | 13.0                            | <b>3.5</b>                                   | 0.0002  | 0.0041               |
| Fam81a      | ENSMUSG000000032224.8  | 0.8              | 2.9                             | <b>3.5</b>                                   | 0.0014  | 0.0243               |
| Tes         | ENSMUSG000000029552.12 | 2.7              | 9.5                             | <b>3.5</b>                                   | 0.0001  | 0.0029               |
| Dlgap5      | ENSMUSG000000037544.5  | 0.2              | 0.7                             | <b>3.5</b>                                   | 0.0019  | 0.0305               |
| Nek2        | ENSMUSG000000026622.8  | 1.3              | 4.6                             | <b>3.5</b>                                   | 0.0001  | 0.0016               |
| Ckap2l      | ENSMUSG000000048327.6  | 0.3              | 1.1                             | <b>3.5</b>                                   | 0.0001  | 0.0029               |
| Inhbb       | ENSMUSG000000037035.5  | 0.3              | 1.2                             | <b>3.5</b>                                   | 0.0001  | 0.0016               |
| Chst1       | ENSMUSG000000027221.5  | 0.3              | 0.9                             | <b>3.5</b>                                   | 0.0005  | 0.0100               |
| Gm5593      | ENSMUSG000000048574.8  | 0.3              | 1.2                             | <b>3.4</b>                                   | 0.0012  | 0.0216               |
| Slc13a3     | ENSMUSG000000018459.9  | 9.7              | 33.4                            | <b>3.4</b>                                   | 0.0002  | 0.0051               |
| Tnfrsf23    | ENSMUSG000000037613.9  | 0.4              | 1.4                             | <b>3.4</b>                                   | 0.0013  | 0.0230               |
| Ecsr        | ENSMUSG000000073599.3  | 2.7              | 9.1                             | <b>3.4</b>                                   | 0.0005  | 0.0110               |
| Slc16a11    | ENSMUSG000000040938.9  | 1.7              | 5.7                             | <b>3.4</b>                                   | 0.0001  | 0.0016               |
| Il1rn       | ENSMUSG000000026981.9  | 6.4              | 21.9                            | <b>3.4</b>                                   | 0.0001  | 0.0016               |
| Gale        | ENSMUSG000000028671.10 | 3.6              | 12.3                            | <b>3.4</b>                                   | 0.0001  | 0.0016               |
| Cry1        | ENSMUSG000000020038.9  | 3.1              | 10.5                            | <b>3.4</b>                                   | 0.0001  | 0.0016               |
| Paqr4       | ENSMUSG000000023909.3  | 0.8              | 2.6                             | <b>3.4</b>                                   | 0.0001  | 0.0016               |
| Gstm3       | ENSMUSG000000004038.7  | 120.5            | 405.5                           | <b>3.4</b>                                   | 0.0006  | 0.0125               |
| Gpr55       | ENSMUSG000000049608.7  | 0.2              | 0.7                             | <b>3.4</b>                                   | 0.0020  | 0.0319               |
| Ccnb2       | ENSMUSG000000032218.6  | 0.7              | 2.3                             | <b>3.3</b>                                   | 0.0002  | 0.0041               |
| Pbk         | ENSMUSG000000022033.3  | 1.0              | 3.4                             | <b>3.3</b>                                   | 0.0022  | 0.0338               |
| Cxcr4       | ENSMUSG000000045382.6  | 1.9              | 6.3                             | <b>3.3</b>                                   | 0.0001  | 0.0016               |
| Abi2        | ENSMUSG000000026782.8  | 0.7              | 2.2                             | <b>3.3</b>                                   | 0.0001  | 0.0016               |
| Cyp2c55     | ENSMUSG000000025002.5  | 1.3              | 4.2                             | <b>3.3</b>                                   | 0.0001  | 0.0016               |

**Supplemental Table 5: Significantly altered transcripts in E2F7/8 deleted liver tumors vs. wildtype liver identified by RNA sequencing.**

| Gene Symbol   | Ensembl ID            | WT mean<br>(n=4) | 78DKO<br>tumor<br>mean<br>(n=4) | Fold<br>change<br>(WT vs.<br>78DKO<br>tumor) | P-value | adjusted P-<br>value |
|---------------|-----------------------|------------------|---------------------------------|----------------------------------------------|---------|----------------------|
| Ccnb1         | ENSMUSG00000041431.10 | 0.6              | 2.1                             | <b>3.3</b>                                   | 0.0010  | 0.0182               |
| Tgfbr2        | ENSMUSG00000032440.5  | 2.8              | 9.2                             | <b>3.3</b>                                   | 0.0001  | 0.0016               |
| Ttc39a        | ENSMUSG00000028555.9  | 3.6              | 11.6                            | <b>3.3</b>                                   | 0.0016  | 0.0262               |
| Tnfrsf19      | ENSMUSG00000060548.5  | 2.0              | 6.6                             | <b>3.3</b>                                   | 0.0001  | 0.0016               |
| Gm6166        | ENSMUSG00000074280.4  | 23.7             | 77.1                            | <b>3.3</b>                                   | 0.0001  | 0.0016               |
| Mthfd2        | ENSMUSG00000005667.6  | 4.7              | 15.3                            | <b>3.3</b>                                   | 0.0024  | 0.0362               |
| Lrrc8b        | ENSMUSG00000070639.3  | 0.7              | 2.1                             | <b>3.3</b>                                   | 0.0029  | 0.0423               |
| Fos           | ENSMUSG00000021250.7  | 0.6              | 1.8                             | <b>3.2</b>                                   | 0.0025  | 0.0378               |
| Itpr3         | ENSMUSG00000042644.8  | 0.3              | 0.9                             | <b>3.2</b>                                   | 0.0001  | 0.0016               |
| Chmp4c        | ENSMUSG00000027536.5  | 1.1              | 3.6                             | <b>3.2</b>                                   | 0.0001  | 0.0016               |
| Pcyox1l       | ENSMUSG00000024579.2  | 0.3              | 1.1                             | <b>3.2</b>                                   | 0.0009  | 0.0165               |
| Gpr56         | ENSMUSG00000031785.8  | 0.9              | 2.8                             | <b>3.2</b>                                   | 0.0001  | 0.0016               |
| Cyp2b13       | ENSMUSG00000040583.6  | 9.9              | 31.7                            | <b>3.2</b>                                   | 0.0001  | 0.0016               |
| Prss23        | ENSMUSG00000039405.6  | 0.8              | 2.5                             | <b>3.2</b>                                   | 0.0001  | 0.0016               |
| Smox          | ENSMUSG00000027333.9  | 2.3              | 7.2                             | <b>3.2</b>                                   | 0.0004  | 0.0091               |
| Cyb561        | ENSMUSG00000019590.9  | 1.9              | 5.9                             | <b>3.2</b>                                   | 0.0001  | 0.0016               |
| 9430020K01Rik | ENSMUSG00000033960.5  | 1.0              | 3.2                             | <b>3.1</b>                                   | 0.0001  | 0.0016               |
| Rad51c        | ENSMUSG00000007646.7  | 0.6              | 1.8                             | <b>3.1</b>                                   | 0.0008  | 0.0157               |
| Fam101b       | ENSMUSG00000020846.6  | 0.6              | 1.9                             | <b>3.1</b>                                   | 0.0001  | 0.0016               |
| Pdp1          | ENSMUSG00000049225.8  | 0.8              | 2.5                             | <b>3.1</b>                                   | 0.0001  | 0.0016               |
| Tmem229a      | ENSMUSG00000048022.9  | 0.4              | 1.1                             | <b>3.1</b>                                   | 0.0001  | 0.0016               |
| C630004H02Rik | ENSMUSG00000034586.8  | 1.6              | 4.9                             | <b>3.1</b>                                   | 0.0008  | 0.0149               |
| Fam55b        | ENSMUSG00000032028.8  | 10.0             | 31.3                            | <b>3.1</b>                                   | 0.0001  | 0.0016               |
| Cxcr7         | ENSMUSG00000044337.5  | 0.3              | 1.0                             | <b>3.1</b>                                   | 0.0004  | 0.0082               |
| Gm12856       | ENSMUSG00000084133.1  | 0.4              | 1.1                             | <b>3.1</b>                                   | 0.0008  | 0.0157               |
| Clip2         | ENSMUSG00000063146.5  | 0.4              | 1.4                             | <b>3.1</b>                                   | 0.0001  | 0.0016               |
| Trp53i11      | ENSMUSG00000068735.7  | 1.9              | 5.9                             | <b>3.1</b>                                   | 0.0001  | 0.0016               |
| Jub           | ENSMUSG00000022178.9  | 0.8              | 2.5                             | <b>3.1</b>                                   | 0.0001  | 0.0016               |
| Ptpn9         | ENSMUSG00000032290.6  | 4.8              | 14.7                            | <b>3.1</b>                                   | 0.0001  | 0.0016               |
| Btg3          | ENSMUSG00000022863.8  | 3.5              | 10.9                            | <b>3.1</b>                                   | 0.0006  | 0.0125               |
| Cyp39a1       | ENSMUSG00000023963.8  | 9.1              | 28.0                            | <b>3.1</b>                                   | 0.0001  | 0.0016               |
| Ncaph         | ENSMUSG00000034906.7  | 0.5              | 1.5                             | <b>3.1</b>                                   | 0.0028  | 0.0411               |
| Tspan15       | ENSMUSG00000037031.8  | 1.3              | 4.1                             | <b>3.1</b>                                   | 0.0001  | 0.0016               |
| Ckap2         | ENSMUSG00000037725.7  | 0.6              | 1.7                             | <b>3.1</b>                                   | 0.0001  | 0.0016               |
| Tlr6          | ENSMUSG00000051498.4  | 0.9              | 2.8                             | <b>3.0</b>                                   | 0.0001  | 0.0016               |
| Ncapg2        | ENSMUSG00000042029.6  | 0.5              | 1.4                             | <b>3.0</b>                                   | 0.0006  | 0.0118               |
| St5           | ENSMUSG00000031024.6  | 3.3              | 10.1                            | <b>3.0</b>                                   | 0.0001  | 0.0016               |

**Supplemental Table 5: Significantly altered transcripts in E2F7/8 deleted liver tumors vs. wildtype liver identified by RNA sequencing.**

| Gene Symbol   | Ensembl ID             | WT mean<br>(n=4) | 78DKO<br>tumor<br>mean<br>(n=4) | Fold<br>change<br>(WT vs.<br>78DKO<br>tumor) | P-value | adjusted P-<br>value |
|---------------|------------------------|------------------|---------------------------------|----------------------------------------------|---------|----------------------|
| Col4a1        | ENSMUSG000000031502.9  | 2.7              | 8.1                             | <b>3.0</b>                                   | 0.0002  | 0.0051               |
| Anln          | ENSMUSG000000036777.7  | 0.2              | 0.7                             | <b>3.0</b>                                   | 0.0027  | 0.0400               |
| Tceal8        | ENSMUSG000000051579.4  | 6.5              | 19.6                            | <b>3.0</b>                                   | 0.0001  | 0.0016               |
| Ifit2         | ENSMUSG000000045932.6  | 1.2              | 3.7                             | <b>3.0</b>                                   | 0.0001  | 0.0016               |
| Stmn1         | ENSMUSG000000028832.5  | 4.7              | 14.3                            | <b>3.0</b>                                   | 0.0001  | 0.0016               |
| Nxn           | ENSMUSG000000020844.6  | 0.6              | 1.7                             | <b>3.0</b>                                   | 0.0025  | 0.0378               |
| Incenp        | ENSMUSG000000024660.7  | 0.6              | 1.9                             | <b>3.0</b>                                   | 0.0001  | 0.0016               |
| Hist2h3c1     | ENSMUSG000000070392.2  | 1.4              | 4.3                             | <b>3.0</b>                                   | 0.0001  | 0.0016               |
| Tmprss2       | ENSMUSG000000000385.7  | 3.2              | 9.5                             | <b>3.0</b>                                   | 0.0001  | 0.0016               |
| Sh2d4a        | ENSMUSG000000053886.3  | 0.6              | 1.8                             | <b>3.0</b>                                   | 0.0002  | 0.0051               |
| Isyna1        | ENSMUSG000000019139.9  | 4.5              | 13.3                            | <b>3.0</b>                                   | 0.0001  | 0.0016               |
| n-R5s156      | ENSMUSG000000065311.1  | 4246.7           | 12559.6                         | <b>3.0</b>                                   | 0.0001  | 0.0016               |
| Cldn15        | ENSMUSG000000001739.7  | 0.5              | 1.3                             | <b>3.0</b>                                   | 0.0013  | 0.0230               |
| Gm20419       | ENSMUSG000000092215.1  | 1.8              | 5.3                             | <b>2.9</b>                                   | 0.0004  | 0.0082               |
| Endod1        | ENSMUSG000000037419.7  | 2.2              | 6.5                             | <b>2.9</b>                                   | 0.0001  | 0.0016               |
| Ect2          | ENSMUSG000000027699.9  | 1.6              | 4.6                             | <b>2.9</b>                                   | 0.0007  | 0.0133               |
| Slc30a2       | ENSMUSG000000028836.8  | 0.6              | 1.7                             | <b>2.9</b>                                   | 0.0032  | 0.0454               |
| 0610010012Rik | ENSMUSG000000046727.6  | 5.4              | 15.8                            | <b>2.9</b>                                   | 0.0001  | 0.0016               |
| Tmem45b       | ENSMUSG000000041737.7  | 1.3              | 3.7                             | <b>2.9</b>                                   | 0.0026  | 0.0383               |
| Vangl1        | ENSMUSG000000027860.9  | 3.5              | 10.3                            | <b>2.9</b>                                   | 0.0014  | 0.0243               |
| Blnk          | ENSMUSG000000061132.7  | 2.4              | 6.9                             | <b>2.9</b>                                   | 0.0001  | 0.0016               |
| Vash1         | ENSMUSG000000021256.4  | 0.6              | 1.7                             | <b>2.9</b>                                   | 0.0002  | 0.0041               |
| Synpo         | ENSMUSG000000043079.10 | 1.8              | 5.2                             | <b>2.9</b>                                   | 0.0012  | 0.0216               |
| Hunk          | ENSMUSG000000053414.6  | 1.3              | 3.7                             | <b>2.9</b>                                   | 0.0003  | 0.0062               |
| Aurka         | ENSMUSG000000027496.9  | 0.8              | 2.3                             | <b>2.9</b>                                   | 0.0001  | 0.0029               |
| Tjp2          | ENSMUSG000000024812.8  | 2.1              | 6.1                             | <b>2.9</b>                                   | 0.0001  | 0.0016               |
| Gm6788        | ENSMUSG000000090737.1  | 5.5              | 15.8                            | <b>2.9</b>                                   | 0.0026  | 0.0383               |
| Rcan3         | ENSMUSG000000059713.6  | 0.8              | 2.3                             | <b>2.8</b>                                   | 0.0029  | 0.0423               |
| Slc44a3       | ENSMUSG000000039865.7  | 2.8              | 7.9                             | <b>2.8</b>                                   | 0.0001  | 0.0016               |
| Arhgap11a     | ENSMUSG000000041219.7  | 0.6              | 1.7                             | <b>2.8</b>                                   | 0.0001  | 0.0016               |
| Ces2d-ps      | ENSMUSG000000031884.8  | 3.7              | 10.5                            | <b>2.8</b>                                   | 0.0001  | 0.0016               |
| Gm11912       | ENSMUSG000000083214.1  | 9.1              | 25.8                            | <b>2.8</b>                                   | 0.0012  | 0.0216               |
| Fmo2          | ENSMUSG000000040170.7  | 9.1              | 25.5                            | <b>2.8</b>                                   | 0.0001  | 0.0016               |
| Efna1         | ENSMUSG000000027954.3  | 15.3             | 42.6                            | <b>2.8</b>                                   | 0.0001  | 0.0016               |
| Hspbap1       | ENSMUSG000000022849.4  | 0.3              | 0.9                             | <b>2.8</b>                                   | 0.0016  | 0.0269               |
| Aqp8          | ENSMUSG000000030762.5  | 48.0             | 133.5                           | <b>2.8</b>                                   | 0.0001  | 0.0016               |
| Casp12        | ENSMUSG000000025887.3  | 1.2              | 3.3                             | <b>2.8</b>                                   | 0.0006  | 0.0118               |

**Supplemental Table 5: Significantly altered transcripts in E2F7/8 deleted liver tumors vs. wildtype liver identified by RNA sequencing.**

| Gene Symbol | Ensembl ID           | WT mean<br>(n=4) | 78DKO<br>tumor<br>mean<br>(n=4) | Fold<br>change<br>(WT vs.<br>78DKO<br>tumor) | P-value | adjusted P-<br>value |
|-------------|----------------------|------------------|---------------------------------|----------------------------------------------|---------|----------------------|
| Pck2        | ENSMUSG00000040618.5 | 1.7              | 4.8                             | <b>2.8</b>                                   | 0.0001  | 0.0016               |
| B4galt6     | ENSMUSG00000056124.5 | 0.5              | 1.4                             | <b>2.8</b>                                   | 0.0001  | 0.0016               |
| Abhd2       | ENSMUSG00000039202.6 | 19.8             | 54.6                            | <b>2.8</b>                                   | 0.0001  | 0.0016               |
| Adrb2       | ENSMUSG00000045730.3 | 1.4              | 3.8                             | <b>2.8</b>                                   | 0.0001  | 0.0016               |
| Fndc3b      | ENSMUSG00000039286.6 | 5.0              | 13.8                            | <b>2.7</b>                                   | 0.0001  | 0.0016               |
| Gspt2       | ENSMUSG00000071723.6 | 1.3              | 3.5                             | <b>2.7</b>                                   | 0.0001  | 0.0016               |
| Slc39a10    | ENSMUSG00000025986.5 | 0.7              | 2.0                             | <b>2.7</b>                                   | 0.0012  | 0.0210               |
| Maff        | ENSMUSG00000042622.7 | 3.5              | 9.6                             | <b>2.7</b>                                   | 0.0001  | 0.0016               |
| Gpr110      | ENSMUSG00000041293.5 | 1.0              | 2.6                             | <b>2.7</b>                                   | 0.0001  | 0.0029               |
| Gm12499     | ENSMUSG00000081688.1 | 9.0              | 24.3                            | <b>2.7</b>                                   | 0.0001  | 0.0016               |
| Twf2        | ENSMUSG00000023277.5 | 1.6              | 4.3                             | <b>2.7</b>                                   | 0.0001  | 0.0016               |
| Dusp6       | ENSMUSG00000019960.6 | 11.7             | 31.7                            | <b>2.7</b>                                   | 0.0001  | 0.0016               |
| Cdc6        | ENSMUSG00000017499.9 | 0.7              | 1.8                             | <b>2.7</b>                                   | 0.0002  | 0.0051               |
| Ptgr1       | ENSMUSG00000028378.6 | 1.3              | 3.4                             | <b>2.7</b>                                   | 0.0001  | 0.0016               |
| Gm7665      | ENSMUSG00000063628.2 | 9.8              | 26.3                            | <b>2.7</b>                                   | 0.0002  | 0.0051               |
| Slc10a2     | ENSMUSG00000023073.1 | 16.4             | 43.9                            | <b>2.7</b>                                   | 0.0001  | 0.0016               |
| Pparg       | ENSMUSG00000000440.6 | 3.4              | 9.2                             | <b>2.7</b>                                   | 0.0001  | 0.0016               |
| Klhl13      | ENSMUSG00000036782.6 | 4.6              | 12.2                            | <b>2.7</b>                                   | 0.0006  | 0.0125               |
| Nedd9       | ENSMUSG00000021365.7 | 1.8              | 4.8                             | <b>2.7</b>                                   | 0.0002  | 0.0041               |
| Ier5        | ENSMUSG00000056708.4 | 1.5              | 3.9                             | <b>2.7</b>                                   | 0.0001  | 0.0016               |
| Tmed6       | ENSMUSG00000031919.5 | 1.9              | 4.9                             | <b>2.7</b>                                   | 0.0005  | 0.0100               |
| Slc6a8      | ENSMUSG00000019558.8 | 3.3              | 8.7                             | <b>2.6</b>                                   | 0.0024  | 0.0366               |
| Fkbp11      | ENSMUSG00000003355.6 | 9.3              | 24.5                            | <b>2.6</b>                                   | 0.0001  | 0.0016               |
| Cldn4       | ENSMUSG00000047501.2 | 0.4              | 1.2                             | <b>2.6</b>                                   | 0.0024  | 0.0362               |
| Itgax       | ENSMUSG00000030789.7 | 0.4              | 1.0                             | <b>2.6</b>                                   | 0.0001  | 0.0029               |
| Abcd2       | ENSMUSG00000055782.7 | 9.2              | 24.4                            | <b>2.6</b>                                   | 0.0002  | 0.0041               |
| Fam84b      | ENSMUSG00000072568.3 | 2.0              | 5.3                             | <b>2.6</b>                                   | 0.0001  | 0.0016               |
| Lamb2       | ENSMUSG00000052911.4 | 0.9              | 2.3                             | <b>2.6</b>                                   | 0.0001  | 0.0016               |
| Usp18       | ENSMUSG00000030107.9 | 5.5              | 14.5                            | <b>2.6</b>                                   | 0.0001  | 0.0029               |
| Fhl3        | ENSMUSG00000032643.6 | 0.8              | 2.1                             | <b>2.6</b>                                   | 0.0005  | 0.0100               |
| Myadm       | ENSMUSG00000068566.6 | 13.1             | 33.9                            | <b>2.6</b>                                   | 0.0001  | 0.0016               |
| Cldn1       | ENSMUSG00000022512.2 | 26.5             | 68.8                            | <b>2.6</b>                                   | 0.0001  | 0.0016               |
| Trip13      | ENSMUSG00000021569.8 | 0.5              | 1.4                             | <b>2.6</b>                                   | 0.0012  | 0.0210               |
| Enpp2       | ENSMUSG00000022425.9 | 29.2             | 75.1                            | <b>2.6</b>                                   | 0.0001  | 0.0016               |
| Sox18       | ENSMUSG00000046470.5 | 1.0              | 2.5                             | <b>2.6</b>                                   | 0.0001  | 0.0016               |
| Prkcdbp     | ENSMUSG00000037060.2 | 1.3              | 3.2                             | <b>2.6</b>                                   | 0.0010  | 0.0182               |
| Scamp5      | ENSMUSG00000040722.6 | 4.8              | 12.4                            | <b>2.6</b>                                   | 0.0001  | 0.0016               |

**Supplemental Table 5: Significantly altered transcripts in E2F7/8 deleted liver tumors vs. wildtype liver identified by RNA sequencing.**

| Gene Symbol   | Ensembl ID             | WT mean<br>(n=4) | 78DKO<br>tumor<br>mean<br>(n=4) | Fold<br>change<br>(WT vs.<br>78DKO<br>tumor) | P-value | adjusted P-<br>value |
|---------------|------------------------|------------------|---------------------------------|----------------------------------------------|---------|----------------------|
| Afap111       | ENSMUSG000000033032.9  | 0.7              | 1.8                             | <b>2.6</b>                                   | 0.0002  | 0.0041               |
| Dyrk3         | ENSMUSG000000016526.7  | 1.2              | 3.0                             | <b>2.5</b>                                   | 0.0002  | 0.0051               |
| Pecam1        | ENSMUSG000000020717.11 | 7.6              | 19.4                            | <b>2.5</b>                                   | 0.0014  | 0.0237               |
| Dcbld1        | ENSMUSG000000019891.7  | 0.8              | 2.0                             | <b>2.5</b>                                   | 0.0005  | 0.0100               |
| Ggct          | ENSMUSG000000002797.7  | 4.5              | 11.4                            | <b>2.5</b>                                   | 0.0002  | 0.0051               |
| Sox4          | ENSMUSG000000076431.3  | 0.7              | 1.8                             | <b>2.5</b>                                   | 0.0001  | 0.0016               |
| Specc1        | ENSMUSG000000042331.7  | 0.4              | 1.1                             | <b>2.5</b>                                   | 0.0012  | 0.0210               |
| Nes           | ENSMUSG000000004891.10 | 0.3              | 0.9                             | <b>2.5</b>                                   | 0.0002  | 0.0041               |
| Sox9          | ENSMUSG000000000567.4  | 1.4              | 3.6                             | <b>2.5</b>                                   | 0.0028  | 0.0411               |
| Dynll1        | ENSMUSG000000009013.4  | 37.7             | 94.7                            | <b>2.5</b>                                   | 0.0001  | 0.0016               |
| Kctd12b       | ENSMUSG000000041633.8  | 0.6              | 1.4                             | <b>2.5</b>                                   | 0.0001  | 0.0016               |
| Tdrkh         | ENSMUSG000000041912.6  | 1.1              | 2.6                             | <b>2.5</b>                                   | 0.0004  | 0.0091               |
| Zfp251        | ENSMUSG000000022526.7  | 0.3              | 0.8                             | <b>2.5</b>                                   | 0.0015  | 0.0250               |
| Akr1b10       | ENSMUSG000000061758.6  | 0.9              | 2.3                             | <b>2.5</b>                                   | 0.0019  | 0.0299               |
| Mfge8         | ENSMUSG000000030605.9  | 11.0             | 27.4                            | <b>2.5</b>                                   | 0.0001  | 0.0016               |
| 2010003K11Rik | ENSMUSG000000042041.6  | 10.5             | 26.1                            | <b>2.5</b>                                   | 0.0001  | 0.0016               |
| Dem1          | ENSMUSG000000028629.2  | 2.8              | 7.0                             | <b>2.5</b>                                   | 0.0032  | 0.0454               |
| Syne1         | ENSMUSG000000019769.9  | 0.9              | 2.3                             | <b>2.5</b>                                   | 0.0014  | 0.0237               |
| Epha2         | ENSMUSG000000006445.3  | 1.5              | 3.8                             | <b>2.5</b>                                   | 0.0002  | 0.0051               |
| Kif22         | ENSMUSG000000030677.7  | 0.5              | 1.2                             | <b>2.5</b>                                   | 0.0032  | 0.0454               |
| Gpc1          | ENSMUSG000000034220.6  | 1.7              | 4.2                             | <b>2.5</b>                                   | 0.0001  | 0.0016               |
| Fmn13         | ENSMUSG000000023008.11 | 1.2              | 2.9                             | <b>2.5</b>                                   | 0.0003  | 0.0062               |
| Slc1a2        | ENSMUSG000000005089.8  | 52.2             | 129.3                           | <b>2.5</b>                                   | 0.0027  | 0.0400               |
| Rarg          | ENSMUSG000000001288.8  | 1.6              | 3.9                             | <b>2.5</b>                                   | 0.0007  | 0.0141               |
| Fmn12         | ENSMUSG000000036053.9  | 1.2              | 2.9                             | <b>2.5</b>                                   | 0.0005  | 0.0100               |
| Map4k4        | ENSMUSG000000026074.7  | 2.1              | 5.2                             | <b>2.5</b>                                   | 0.0001  | 0.0016               |
| Fam115a       | ENSMUSG000000036667.8  | 2.4              | 6.0                             | <b>2.5</b>                                   | 0.0001  | 0.0029               |
| Rtkn          | ENSMUSG000000034930.9  | 2.2              | 5.3                             | <b>2.5</b>                                   | 0.0004  | 0.0082               |
| Tubb6         | ENSMUSG000000001473.6  | 4.5              | 11.1                            | <b>2.5</b>                                   | 0.0001  | 0.0016               |
| Mkl1          | ENSMUSG000000012519.8  | 4.0              | 9.7                             | <b>2.5</b>                                   | 0.0032  | 0.0454               |
| Pppde1        | ENSMUSG000000026502.7  | 4.8              | 11.8                            | <b>2.4</b>                                   | 0.0001  | 0.0016               |
| Gm15611       | ENSMUSG000000084923.1  | 4.2              | 10.2                            | <b>2.4</b>                                   | 0.0021  | 0.0324               |
| Fgf21         | ENSMUSG000000030827.4  | 2.5              | 6.2                             | <b>2.4</b>                                   | 0.0003  | 0.0072               |
| Abhd5         | ENSMUSG000000032540.8  | 28.8             | 70.3                            | <b>2.4</b>                                   | 0.0001  | 0.0016               |
| Pawr          | ENSMUSG000000035873.6  | 4.0              | 9.8                             | <b>2.4</b>                                   | 0.0001  | 0.0016               |
| Ets2          | ENSMUSG000000022895.8  | 10.2             | 24.8                            | <b>2.4</b>                                   | 0.0002  | 0.0051               |
| Abcg1         | ENSMUSG000000024030.6  | 2.9              | 6.9                             | <b>2.4</b>                                   | 0.0001  | 0.0016               |

**Supplemental Table 5: Significantly altered transcripts in E2F7/8 deleted liver tumors vs. wildtype liver identified by RNA sequencing.**

| Gene Symbol   | Ensembl ID            | WT mean<br>(n=4) | 78DKO<br>tumor<br>mean<br>(n=4) | Fold<br>change<br>(WT vs.<br>78DKO<br>tumor) | P-value | adjusted P-<br>value |
|---------------|-----------------------|------------------|---------------------------------|----------------------------------------------|---------|----------------------|
| S100a11       | ENSMUSG00000027907.4  | 8.9              | 21.6                            | <b>2.4</b>                                   | 0.0001  | 0.0016               |
| Plek2         | ENSMUSG00000021118.7  | 0.7              | 1.8                             | <b>2.4</b>                                   | 0.0023  | 0.0351               |
| Itga6         | ENSMUSG00000027111.8  | 2.4              | 5.7                             | <b>2.4</b>                                   | 0.0001  | 0.0016               |
| Ly96          | ENSMUSG00000025779.4  | 6.9              | 16.7                            | <b>2.4</b>                                   | 0.0007  | 0.0141               |
| Trim2         | ENSMUSG00000027993.10 | 4.8              | 11.5                            | <b>2.4</b>                                   | 0.0016  | 0.0269               |
| Acot9         | ENSMUSG00000025287.9  | 2.6              | 6.4                             | <b>2.4</b>                                   | 0.0001  | 0.0029               |
| Ptgds         | ENSMUSG00000015090.7  | 2.5              | 6.0                             | <b>2.4</b>                                   | 0.0014  | 0.0243               |
| Pdgfb         | ENSMUSG00000000489.6  | 0.7              | 1.7                             | <b>2.4</b>                                   | 0.0003  | 0.0072               |
| Ccl20         | ENSMUSG00000026166.8  | 4.1              | 9.9                             | <b>2.4</b>                                   | 0.0010  | 0.0189               |
| Gstm2         | ENSMUSG00000040562.6  | 89.5             | 214.6                           | <b>2.4</b>                                   | 0.0001  | 0.0016               |
| Scn1b         | ENSMUSG00000019194.8  | 4.7              | 11.3                            | <b>2.4</b>                                   | 0.0001  | 0.0016               |
| Kcnc3         | ENSMUSG00000062785.6  | 0.3              | 0.7                             | <b>2.4</b>                                   | 0.0008  | 0.0157               |
| Klf6          | ENSMUSG00000000078.6  | 4.9              | 11.6                            | <b>2.4</b>                                   | 0.0001  | 0.0016               |
| Chic1         | ENSMUSG00000031327.9  | 1.3              | 3.0                             | <b>2.4</b>                                   | 0.0036  | 0.0493               |
| B930041F14Rik | ENSMUSG00000074738.2  | 0.6              | 1.4                             | <b>2.4</b>                                   | 0.0011  | 0.0196               |
| Acsl4         | ENSMUSG00000031278.6  | 18.7             | 44.1                            | <b>2.4</b>                                   | 0.0001  | 0.0016               |
| Shank2        | ENSMUSG00000037541.12 | 1.2              | 2.8                             | <b>2.4</b>                                   | 0.0007  | 0.0133               |
| 2010002N04Rik | ENSMUSG00000038059.6  | 0.7              | 1.7                             | <b>2.3</b>                                   | 0.0020  | 0.0312               |
| Entpd2        | ENSMUSG00000015085.7  | 4.9              | 11.5                            | <b>2.3</b>                                   | 0.0027  | 0.0400               |
| Rnf145        | ENSMUSG00000019189.7  | 17.0             | 39.6                            | <b>2.3</b>                                   | 0.0004  | 0.0082               |
| Cxadr         | ENSMUSG00000022865.7  | 22.0             | 51.3                            | <b>2.3</b>                                   | 0.0001  | 0.0016               |
| Sema6b        | ENSMUSG00000001227.5  | 0.7              | 1.5                             | <b>2.3</b>                                   | 0.0005  | 0.0100               |
| Plscr1        | ENSMUSG00000032369.7  | 8.6              | 20.1                            | <b>2.3</b>                                   | 0.0001  | 0.0016               |
| N4bp3         | ENSMUSG00000001053.9  | 1.2              | 2.8                             | <b>2.3</b>                                   | 0.0025  | 0.0373               |
| Acmsd         | ENSMUSG00000026348.6  | 7.7              | 17.9                            | <b>2.3</b>                                   | 0.0001  | 0.0016               |
| E2f1          | ENSMUSG00000027490.10 | 2.0              | 4.7                             | <b>2.3</b>                                   | 0.0001  | 0.0016               |
| Unc5b         | ENSMUSG00000020099.6  | 1.4              | 3.2                             | <b>2.3</b>                                   | 0.0001  | 0.0016               |
| Gm6484        | ENSMUSG00000047822.7  | 16.2             | 37.5                            | <b>2.3</b>                                   | 0.0021  | 0.0324               |
| Gm5844        | ENSMUSG00000082896.1  | 23.2             | 53.3                            | <b>2.3</b>                                   | 0.0001  | 0.0016               |
| Amot          | ENSMUSG00000041688.10 | 2.5              | 5.8                             | <b>2.3</b>                                   | 0.0007  | 0.0141               |
| Sel1l3        | ENSMUSG00000029189.6  | 1.7              | 3.9                             | <b>2.3</b>                                   | 0.0001  | 0.0016               |
| 9030619P08Rik | ENSMUSG00000053168.4  | 15.6             | 35.9                            | <b>2.3</b>                                   | 0.0001  | 0.0016               |
| Cyp4f16       | ENSMUSG00000048440.9  | 5.5              | 12.6                            | <b>2.3</b>                                   | 0.0015  | 0.0255               |
| Pcp4l1        | ENSMUSG00000038370.6  | 12.1             | 27.7                            | <b>2.3</b>                                   | 0.0001  | 0.0016               |
| Ywhah         | ENSMUSG00000018965.9  | 95.1             | 218.2                           | <b>2.3</b>                                   | 0.0001  | 0.0016               |
| Fam46a        | ENSMUSG00000032265.8  | 1.4              | 3.1                             | <b>2.3</b>                                   | 0.0001  | 0.0016               |
| Fam84a        | ENSMUSG00000020607.6  | 0.4              | 0.9                             | <b>2.3</b>                                   | 0.0010  | 0.0189               |

**Supplemental Table 5: Significantly altered transcripts in E2F7/8 deleted liver tumors vs. wildtype liver identified by RNA sequencing.**

| Gene Symbol | Ensembl ID             | WT mean<br>(n=4) | 78DKO<br>tumor<br>mean<br>(n=4) | Fold<br>change<br>(WT vs.<br>78DKO<br>tumor) | P-value | adjusted P-<br>value |
|-------------|------------------------|------------------|---------------------------------|----------------------------------------------|---------|----------------------|
| Efha1       | ENSMUSG000000021973.8  | 7.3              | 16.7                            | <b>2.3</b>                                   | 0.0001  | 0.0016               |
| Unc119      | ENSMUSG000000002058.7  | 4.0              | 9.2                             | <b>2.3</b>                                   | 0.0001  | 0.0029               |
| Dtx4        | ENSMUSG000000039982.7  | 1.8              | 4.1                             | <b>2.3</b>                                   | 0.0001  | 0.0016               |
| Nkd1        | ENSMUSG000000031661.5  | 1.1              | 2.6                             | <b>2.3</b>                                   | 0.0002  | 0.0041               |
| 5-Sep       | ENSMUSG000000072214.5  | 1.1              | 2.5                             | <b>2.3</b>                                   | 0.0007  | 0.0141               |
| Trib2       | ENSMUSG000000020601.7  | 0.5              | 1.1                             | <b>2.3</b>                                   | 0.0011  | 0.0196               |
| Osmr        | ENSMUSG000000022146.5  | 0.7              | 1.5                             | <b>2.3</b>                                   | 0.0033  | 0.0466               |
| Zfp704      | ENSMUSG000000040209.7  | 0.6              | 1.4                             | <b>2.3</b>                                   | 0.0002  | 0.0051               |
| Slc2a4      | ENSMUSG000000018566.7  | 2.4              | 5.3                             | <b>2.3</b>                                   | 0.0013  | 0.0230               |
| Dpysl2      | ENSMUSG000000022048.8  | 1.7              | 3.9                             | <b>2.3</b>                                   | 0.0001  | 0.0016               |
| Tagln2      | ENSMUSG000000026547.9  | 23.1             | 51.9                            | <b>2.2</b>                                   | 0.0001  | 0.0016               |
| Robo4       | ENSMUSG000000032125.12 | 1.2              | 2.7                             | <b>2.2</b>                                   | 0.0001  | 0.0016               |
| Gm12346     | ENSMUSG000000083899.1  | 31.1             | 69.6                            | <b>2.2</b>                                   | 0.0001  | 0.0016               |
| Dab2ip      | ENSMUSG000000026883.10 | 1.8              | 4.0                             | <b>2.2</b>                                   | 0.0003  | 0.0062               |
| Nucb2       | ENSMUSG000000030659.7  | 1.3              | 3.0                             | <b>2.2</b>                                   | 0.0016  | 0.0262               |
| Zfp295      | ENSMUSG000000046962.8  | 1.1              | 2.4                             | <b>2.2</b>                                   | 0.0001  | 0.0016               |
| Slc16a1     | ENSMUSG000000032902.1  | 14.8             | 32.6                            | <b>2.2</b>                                   | 0.0001  | 0.0016               |
| Kifc3       | ENSMUSG000000031788.7  | 2.0              | 4.4                             | <b>2.2</b>                                   | 0.0004  | 0.0091               |
| Il17rb      | ENSMUSG000000015966.9  | 5.6              | 12.4                            | <b>2.2</b>                                   | 0.0001  | 0.0016               |
| Hes1        | ENSMUSG000000022528.7  | 4.8              | 10.5                            | <b>2.2</b>                                   | 0.0001  | 0.0016               |
| Rdh11       | ENSMUSG000000066441.7  | 33.9             | 74.5                            | <b>2.2</b>                                   | 0.0001  | 0.0016               |
| Mmrn2       | ENSMUSG000000041445.8  | 1.8              | 3.9                             | <b>2.2</b>                                   | 0.0001  | 0.0016               |
| Ptrf        | ENSMUSG000000004044.8  | 2.7              | 6.0                             | <b>2.2</b>                                   | 0.0001  | 0.0029               |
| Fubp1       | ENSMUSG000000028034.8  | 4.0              | 8.9                             | <b>2.2</b>                                   | 0.0001  | 0.0016               |
| Ypel2       | ENSMUSG000000018427.7  | 2.3              | 5.1                             | <b>2.2</b>                                   | 0.0001  | 0.0016               |
| Ifngr1      | ENSMUSG000000020009.6  | 18.0             | 39.5                            | <b>2.2</b>                                   | 0.0001  | 0.0016               |
| Timp3       | ENSMUSG000000020044.7  | 6.0              | 13.0                            | <b>2.2</b>                                   | 0.0018  | 0.0288               |
| Tcf19       | ENSMUSG000000050410.9  | 1.9              | 4.0                             | <b>2.2</b>                                   | 0.0010  | 0.0189               |
| Atad2       | ENSMUSG000000022360.6  | 1.0              | 2.2                             | <b>2.2</b>                                   | 0.0010  | 0.0189               |
| Fam43a      | ENSMUSG000000046546.3  | 0.7              | 1.6                             | <b>2.2</b>                                   | 0.0007  | 0.0141               |
| App         | ENSMUSG000000022892.9  | 54.1             | 117.3                           | <b>2.2</b>                                   | 0.0001  | 0.0029               |
| Ces2e       | ENSMUSG000000031886.7  | 61.9             | 133.8                           | <b>2.2</b>                                   | 0.0002  | 0.0041               |
| Dcaf12l1    | ENSMUSG000000045284.3  | 0.8              | 1.7                             | <b>2.2</b>                                   | 0.0004  | 0.0091               |
| Ppard       | ENSMUSG000000002250.9  | 2.1              | 4.4                             | <b>2.2</b>                                   | 0.0013  | 0.0224               |
| Nr0b2       | ENSMUSG000000037583.2  | 9.5              | 20.6                            | <b>2.2</b>                                   | 0.0001  | 0.0029               |
| Plau        | ENSMUSG000000021822.2  | 1.0              | 2.2                             | <b>2.2</b>                                   | 0.0013  | 0.0230               |
| Apold1      | ENSMUSG000000090698.1  | 0.5              | 1.0                             | <b>2.1</b>                                   | 0.0024  | 0.0366               |



**Supplemental Table 5: Significantly altered transcripts in E2F7/8 deleted liver tumors vs. wildtype liver identified by RNA sequencing.**

| Gene Symbol   | Ensembl ID            | WT mean<br>(n=4) | 78DKO<br>tumor<br>mean<br>(n=4) | Fold<br>change<br>(WT vs.<br>78DKO<br>tumor) | P-value | adjusted P-<br>value |
|---------------|-----------------------|------------------|---------------------------------|----------------------------------------------|---------|----------------------|
| Mcm6          | ENSMUSG00000026355.4  | 4.6              | 9.9                             | <b>2.1</b>                                   | 0.0001  | 0.0016               |
| Acnat2        | ENSMUSG00000060317.3  | 68.4             | 146.4                           | <b>2.1</b>                                   | 0.0001  | 0.0016               |
| Gm9372        | ENSMUSG00000090474.1  | 6.0              | 12.9                            | <b>2.1</b>                                   | 0.0030  | 0.0434               |
| Cmpk2         | ENSMUSG00000020638.7  | 1.1              | 2.4                             | <b>2.1</b>                                   | 0.0003  | 0.0062               |
| Srxn1         | ENSMUSG00000032802.7  | 23.8             | 50.5                            | <b>2.1</b>                                   | 0.0022  | 0.0338               |
| Gm5530        | ENSMUSG00000087008.2  | 7.2              | 15.2                            | <b>2.1</b>                                   | 0.0001  | 0.0016               |
| Gm16854       | ENSMUSG00000085607.1  | 2.6              | 5.5                             | <b>2.1</b>                                   | 0.0001  | 0.0016               |
| Ctps2         | ENSMUSG00000031360.8  | 9.9              | 20.9                            | <b>2.1</b>                                   | 0.0018  | 0.0293               |
| Ddit4         | ENSMUSG00000020108.3  | 2.1              | 4.5                             | <b>2.1</b>                                   | 0.0002  | 0.0051               |
| Emp2          | ENSMUSG00000022505.7  | 18.9             | 39.9                            | <b>2.1</b>                                   | 0.0020  | 0.0312               |
| Gm11694       | ENSMUSG00000081376.1  | 1216.6           | 2550.9                          | <b>2.1</b>                                   | 0.0001  | 0.0016               |
| Net1          | ENSMUSG00000021215.8  | 18.1             | 37.9                            | <b>2.1</b>                                   | 0.0001  | 0.0016               |
| Tm4sf1        | ENSMUSG00000027800.8  | 4.4              | 9.2                             | <b>2.1</b>                                   | 0.0001  | 0.0016               |
| S1pr3         | ENSMUSG00000067586.3  | 1.3              | 2.6                             | <b>2.1</b>                                   | 0.0001  | 0.0029               |
| Dapk2         | ENSMUSG00000032380.2  | 9.0              | 18.7                            | <b>2.1</b>                                   | 0.0003  | 0.0072               |
| Tspyl2        | ENSMUSG00000041096.6  | 1.0              | 2.1                             | <b>2.1</b>                                   | 0.0008  | 0.0149               |
| Plxna2        | ENSMUSG00000026640.6  | 1.4              | 3.0                             | <b>2.1</b>                                   | 0.0001  | 0.0016               |
| Spc25         | ENSMUSG00000005233.9  | 3.8              | 7.9                             | <b>2.1</b>                                   | 0.0026  | 0.0383               |
| Gm14107       | ENSMUSG00000080844.1  | 81.0             | 168.0                           | <b>2.1</b>                                   | 0.0001  | 0.0016               |
| Gyg           | ENSMUSG00000019528.9  | 2.4              | 5.0                             | <b>2.1</b>                                   | 0.0003  | 0.0062               |
| Enc1          | ENSMUSG00000041773.7  | 1.2              | 2.4                             | <b>2.1</b>                                   | 0.0002  | 0.0041               |
| Hapln4        | ENSMUSG00000007594.9  | 2.0              | 4.1                             | <b>2.1</b>                                   | 0.0001  | 0.0029               |
| Cyp1b1        | ENSMUSG00000024087.2  | 0.7              | 1.4                             | <b>2.0</b>                                   | 0.0026  | 0.0389               |
| Nipal1        | ENSMUSG00000067219.5  | 3.5              | 7.1                             | <b>2.0</b>                                   | 0.0001  | 0.0016               |
| Vcam1         | ENSMUSG00000027962.9  | 6.1              | 12.5                            | <b>2.0</b>                                   | 0.0001  | 0.0016               |
| Pkp2          | ENSMUSG00000041957.8  | 11.5             | 23.5                            | <b>2.0</b>                                   | 0.0001  | 0.0016               |
| Cyb5r1        | ENSMUSG00000026456.11 | 4.0              | 8.2                             | <b>2.0</b>                                   | 0.0001  | 0.0016               |
| Cd24a         | ENSMUSG00000047139.8  | 4.3              | 8.8                             | <b>2.0</b>                                   | 0.0001  | 0.0029               |
| Slc16a5       | ENSMUSG00000045775.9  | 7.4              | 14.9                            | <b>2.0</b>                                   | 0.0002  | 0.0051               |
| Tubb2c        | ENSMUSG00000036752.4  | 31.7             | 64.1                            | <b>2.0</b>                                   | 0.0001  | 0.0016               |
| Gpihbp1       | ENSMUSG00000022579.4  | 7.2              | 14.6                            | <b>2.0</b>                                   | 0.0005  | 0.0110               |
| Cys1          | ENSMUSG00000062563.8  | 3.2              | 6.5                             | <b>2.0</b>                                   | 0.0031  | 0.0439               |
| Itpripl2      | ENSMUSG00000073859.2  | 1.2              | 2.5                             | <b>2.0</b>                                   | 0.0035  | 0.0488               |
| Pea15a        | ENSMUSG00000013698.6  | 7.2              | 14.6                            | <b>2.0</b>                                   | 0.0001  | 0.0016               |
| Capn10        | ENSMUSG00000026270.5  | 8.1              | 16.4                            | <b>2.0</b>                                   | 0.0021  | 0.0324               |
| Nlrp4e        | ENSMUSG00000045693.7  | 1.5              | 2.9                             | <b>2.0</b>                                   | 0.0001  | 0.0016               |
| 2310014L17Rik | ENSMUSG00000033967.4  | 2.3              | 4.7                             | <b>2.0</b>                                   | 0.0001  | 0.0016               |

**Supplemental Table 5: Significantly altered transcripts in E2F7/8 deleted liver tumors vs. wildtype liver identified by RNA sequencing.**

| Gene Symbol   | Ensembl ID            | WT mean<br>(n=4) | 78DKO<br>tumor<br>mean<br>(n=4) | Fold<br>change<br>(WT vs.<br>78DKO<br>tumor) | P-value | adjusted P-<br>value |
|---------------|-----------------------|------------------|---------------------------------|----------------------------------------------|---------|----------------------|
| Cdk6          | ENSMUSG00000040274.5  | 3.7              | 7.4                             | <b>2.0</b>                                   | 0.0031  | 0.0443               |
| 1700017B05Rik | ENSMUSG00000032300.5  | 2.3              | 4.7                             | <b>2.0</b>                                   | 0.0009  | 0.0165               |
| Spib          | ENSMUSG00000008193.6  | 5.1              | 10.1                            | <b>2.0</b>                                   | 0.0007  | 0.0141               |
| Epcam         | ENSMUSG00000045394.8  | 2.2              | 4.4                             | <b>2.0</b>                                   | 0.0033  | 0.0466               |
| Gimap8        | ENSMUSG00000064262.4  | 1.2              | 2.4                             | <b>2.0</b>                                   | 0.0009  | 0.0165               |
| Kctd3         | ENSMUSG00000026608.6  | 2.7              | 5.4                             | <b>2.0</b>                                   | 0.0001  | 0.0029               |
| Rrbp1         | ENSMUSG00000027422.9  | 65.0             | 128.6                           | <b>2.0</b>                                   | 0.0005  | 0.0110               |
| Acot10        | ENSMUSG00000047565.4  | 2.0              | 4.0                             | <b>2.0</b>                                   | 0.0016  | 0.0262               |
| Pold4         | ENSMUSG00000024854.3  | 10.8             | 21.3                            | <b>2.0</b>                                   | 0.0002  | 0.0051               |
| 2310016C08Rik | ENSMUSG00000043421.8  | 2.8              | 5.5                             | <b>2.0</b>                                   | 0.0019  | 0.0305               |
| Egr1          | ENSMUSG00000038418.6  | 12.7             | 25.0                            | <b>2.0</b>                                   | 0.0003  | 0.0062               |
| Nudt18        | ENSMUSG00000045211.4  | 2.5              | 4.9                             | <b>2.0</b>                                   | 0.0001  | 0.0016               |
| Sparc         | ENSMUSG00000018593.6  | 37.9             | 74.5                            | <b>2.0</b>                                   | 0.0001  | 0.0016               |
| Gramd4        | ENSMUSG00000035900.12 | 1.5              | 2.8                             | <b>2.0</b>                                   | 0.0029  | 0.0417               |
| Gm17383       | ENSMUSG00000058625.5  | 19.1             | 37.3                            | <b>2.0</b>                                   | 0.0001  | 0.0016               |
| Ppap2c        | ENSMUSG00000052151.5  | 12.6             | 24.5                            | <b>2.0</b>                                   | 0.0001  | 0.0016               |
| Psph          | ENSMUSG00000029446.7  | 7.3              | 14.2                            | <b>1.9</b>                                   | 0.0017  | 0.0276               |
| Il22ra1       | ENSMUSG00000037157.8  | 1.6              | 3.0                             | <b>1.9</b>                                   | 0.0011  | 0.0203               |
| Abhd8         | ENSMUSG00000007950.8  | 1.9              | 3.7                             | <b>1.9</b>                                   | 0.0015  | 0.0255               |
| Pvr           | ENSMUSG00000040511.7  | 3.8              | 7.4                             | <b>1.9</b>                                   | 0.0004  | 0.0082               |
| Wwtr1         | ENSMUSG00000027803.8  | 3.8              | 7.4                             | <b>1.9</b>                                   | 0.0005  | 0.0100               |
| Gm12013       | ENSMUSG00000082099.1  | 1511.4           | 2920.1                          | <b>1.9</b>                                   | 0.0001  | 0.0029               |
| Krt8          | ENSMUSG00000049382.9  | 72.2             | 139.0                           | <b>1.9</b>                                   | 0.0004  | 0.0091               |
| Tuba1c        | ENSMUSG00000043091.8  | 22.3             | 42.9                            | <b>1.9</b>                                   | 0.0001  | 0.0016               |
| Wdr67         | ENSMUSG00000022364.7  | 1.9              | 3.6                             | <b>1.9</b>                                   | 0.0019  | 0.0305               |
| Hist1h1c      | ENSMUSG00000036181.1  | 7.6              | 14.6                            | <b>1.9</b>                                   | 0.0002  | 0.0051               |
| Tbc1d25       | ENSMUSG00000039201.3  | 1.8              | 3.4                             | <b>1.9</b>                                   | 0.0024  | 0.0366               |
| Ptplb         | ENSMUSG00000035376.9  | 10.0             | 19.1                            | <b>1.9</b>                                   | 0.0002  | 0.0041               |
| F2r           | ENSMUSG00000048376.5  | 3.9              | 7.5                             | <b>1.9</b>                                   | 0.0001  | 0.0029               |
| B3galt1       | ENSMUSG00000034780.4  | 8.7              | 16.5                            | <b>1.9</b>                                   | 0.0002  | 0.0051               |
| Vegfb         | ENSMUSG00000024962.7  | 4.6              | 8.8                             | <b>1.9</b>                                   | 0.0017  | 0.0276               |
| Gng11         | ENSMUSG00000032766.8  | 6.0              | 11.5                            | <b>1.9</b>                                   | 0.0022  | 0.0338               |
| Gm5620        | ENSMUSG00000056904.2  | 15.5             | 29.5                            | <b>1.9</b>                                   | 0.0001  | 0.0029               |
| Tgm1          | ENSMUSG00000022218.8  | 7.1              | 13.5                            | <b>1.9</b>                                   | 0.0007  | 0.0133               |
| Kcnj8         | ENSMUSG00000030247.7  | 2.4              | 4.6                             | <b>1.9</b>                                   | 0.0006  | 0.0125               |
| Fam46c        | ENSMUSG00000044468.8  | 2.9              | 5.4                             | <b>1.9</b>                                   | 0.0002  | 0.0051               |
| Ifit3         | ENSMUSG00000074896.3  | 3.8              | 7.1                             | <b>1.9</b>                                   | 0.0024  | 0.0362               |

**Supplemental Table 5: Significantly altered transcripts in E2F7/8 deleted liver tumors vs. wildtype liver identified by RNA sequencing.**

| Gene Symbol | Ensembl ID             | WT mean<br>(n=4) | 78DKO<br>tumor<br>mean<br>(n=4) | Fold<br>change<br>(WT vs.<br>78DKO<br>tumor) | P-value | adjusted P-<br>value |
|-------------|------------------------|------------------|---------------------------------|----------------------------------------------|---------|----------------------|
| Ctla2a      | ENSMUSG00000044258.9   | 3.9              | 7.3                             | <b>1.9</b>                                   | 0.0021  | 0.0332               |
| Jun         | ENSMUSG000000052684.3  | 4.5              | 8.5                             | <b>1.9</b>                                   | 0.0017  | 0.0276               |
| Ccdc85b     | ENSMUSG000000042878.5  | 1.0              | 1.8                             | <b>1.9</b>                                   | 0.0031  | 0.0443               |
| Tuba1a      | ENSMUSG000000072235.5  | 13.0             | 24.1                            | <b>1.9</b>                                   | 0.0012  | 0.0210               |
| Ripk4       | ENSMUSG000000005251.8  | 2.2              | 4.1                             | <b>1.9</b>                                   | 0.0007  | 0.0133               |
| Gm12715     | ENSMUSG000000059195.8  | 38.9             | 72.1                            | <b>1.9</b>                                   | 0.0002  | 0.0051               |
| Acer2       | ENSMUSG000000038007.8  | 3.2              | 5.9                             | <b>1.9</b>                                   | 0.0027  | 0.0396               |
| Mcm5        | ENSMUSG000000005410.4  | 3.5              | 6.4                             | <b>1.9</b>                                   | 0.0033  | 0.0460               |
| Chmp6       | ENSMUSG000000025371.6  | 8.3              | 15.3                            | <b>1.8</b>                                   | 0.0003  | 0.0072               |
| Frrs1       | ENSMUSG000000033386.6  | 12.6             | 23.3                            | <b>1.8</b>                                   | 0.0001  | 0.0016               |
| Slc35c1     | ENSMUSG000000049922.7  | 5.7              | 10.5                            | <b>1.8</b>                                   | 0.0007  | 0.0141               |
| Abcc9       | ENSMUSG000000030249.8  | 3.1              | 5.8                             | <b>1.8</b>                                   | 0.0015  | 0.0250               |
| Ifrd1       | ENSMUSG000000001627.5  | 24.4             | 45.0                            | <b>1.8</b>                                   | 0.0036  | 0.0499               |
| Trim68      | ENSMUSG000000073968.3  | 1.5              | 2.7                             | <b>1.8</b>                                   | 0.0031  | 0.0439               |
| Mdfic       | ENSMUSG000000041390.11 | 9.6              | 17.8                            | <b>1.8</b>                                   | 0.0002  | 0.0051               |
| As3mt       | ENSMUSG000000003559.7  | 11.2             | 20.6                            | <b>1.8</b>                                   | 0.0005  | 0.0110               |
| Lsr         | ENSMUSG000000001247.9  | 61.9             | 113.9                           | <b>1.8</b>                                   | 0.0036  | 0.0493               |
| Gm11401     | ENSMUSG000000081153.1  | 38.8             | 71.3                            | <b>1.8</b>                                   | 0.0018  | 0.0293               |
| Rock2       | ENSMUSG000000020580.8  | 2.0              | 3.7                             | <b>1.8</b>                                   | 0.0004  | 0.0091               |
| Myo1c       | ENSMUSG000000017774.12 | 10.1             | 18.5                            | <b>1.8</b>                                   | 0.0004  | 0.0082               |
| Ctsf        | ENSMUSG000000083282.2  | 3.7              | 6.7                             | <b>1.8</b>                                   | 0.0010  | 0.0189               |
| Tra2a       | ENSMUSG000000029817.8  | 5.9              | 10.7                            | <b>1.8</b>                                   | 0.0011  | 0.0196               |
| Tpm4        | ENSMUSG000000031799.9  | 10.3             | 18.8                            | <b>1.8</b>                                   | 0.0002  | 0.0041               |
| Cd276       | ENSMUSG000000035914.4  | 2.0              | 3.6                             | <b>1.8</b>                                   | 0.0016  | 0.0262               |
| Ptpn21      | ENSMUSG000000021009.7  | 4.7              | 8.6                             | <b>1.8</b>                                   | 0.0028  | 0.0411               |
| Nfil3       | ENSMUSG000000056749.7  | 6.5              | 11.7                            | <b>1.8</b>                                   | 0.0007  | 0.0141               |
| Arhgef5     | ENSMUSG000000033542.6  | 4.0              | 7.3                             | <b>1.8</b>                                   | 0.0003  | 0.0062               |
| Avpr1a      | ENSMUSG000000020123.5  | 14.3             | 25.9                            | <b>1.8</b>                                   | 0.0012  | 0.0216               |
| Ano10       | ENSMUSG000000037949.6  | 7.5              | 13.6                            | <b>1.8</b>                                   | 0.0002  | 0.0051               |
| Mat2a       | ENSMUSG000000053907.8  | 29.7             | 53.5                            | <b>1.8</b>                                   | 0.0008  | 0.0149               |
| Pnrc1       | ENSMUSG000000040128.9  | 29.4             | 52.9                            | <b>1.8</b>                                   | 0.0024  | 0.0366               |
| Lnx2        | ENSMUSG000000016520.7  | 1.9              | 3.4                             | <b>1.8</b>                                   | 0.0022  | 0.0343               |
| Atp6v0e2    | ENSMUSG000000039347.5  | 2.5              | 4.4                             | <b>1.8</b>                                   | 0.0034  | 0.0477               |
| Tuba1b      | ENSMUSG000000023004.8  | 24.4             | 43.7                            | <b>1.8</b>                                   | 0.0001  | 0.0029               |
| Tpm1        | ENSMUSG000000032366.9  | 31.4             | 56.0                            | <b>1.8</b>                                   | 0.0001  | 0.0016               |
| Cd2ap       | ENSMUSG000000061665.6  | 7.0              | 12.4                            | <b>1.8</b>                                   | 0.0002  | 0.0051               |
| Abca8b      | ENSMUSG000000020620.8  | 10.6             | 18.8                            | <b>1.8</b>                                   | 0.0008  | 0.0149               |

**Supplemental Table 5: Significantly altered transcripts in E2F7/8 deleted liver tumors vs. wildtype liver identified by RNA sequencing.**

| Gene Symbol | Ensembl ID            | WT mean<br>(n=4) | 78DKO<br>tumor<br>mean<br>(n=4) | Fold<br>change<br>(WT vs.<br>78DKO<br>tumor) | P-value | adjusted P-<br>value |
|-------------|-----------------------|------------------|---------------------------------|----------------------------------------------|---------|----------------------|
| Lrp5        | ENSMUSG00000024913.9  | 10.4             | 18.5                            | <b>1.8</b>                                   | 0.0003  | 0.0062               |
| Prkx        | ENSMUSG00000035725.7  | 1.9              | 3.3                             | <b>1.8</b>                                   | 0.0019  | 0.0299               |
| Hn1         | ENSMUSG00000020737.6  | 8.0              | 14.2                            | <b>1.8</b>                                   | 0.0005  | 0.0110               |
| Atpif1      | ENSMUSG00000054428.6  | 36.3             | 64.0                            | <b>1.8</b>                                   | 0.0013  | 0.0230               |
| Slc45a3     | ENSMUSG00000026435.8  | 5.3              | 9.4                             | <b>1.8</b>                                   | 0.0006  | 0.0125               |
| Dgkd        | ENSMUSG00000070738.4  | 3.4              | 6.0                             | <b>1.8</b>                                   | 0.0006  | 0.0118               |
| Fat1        | ENSMUSG00000070047.5  | 1.7              | 3.0                             | <b>1.8</b>                                   | 0.0007  | 0.0133               |
| Chmp2b      | ENSMUSG00000004843.6  | 18.3             | 32.2                            | <b>1.8</b>                                   | 0.0001  | 0.0029               |
| Gm11295     | ENSMUSG00000084038.1  | 11.3             | 19.8                            | <b>1.7</b>                                   | 0.0030  | 0.0428               |
| Pter        | ENSMUSG00000026730.6  | 80.8             | 141.1                           | <b>1.7</b>                                   | 0.0030  | 0.0434               |
| Emp1        | ENSMUSG00000030208.9  | 3.3              | 5.8                             | <b>1.7</b>                                   | 0.0019  | 0.0305               |
| Scd3        | ENSMUSG00000025202.6  | 38.7             | 67.2                            | <b>1.7</b>                                   | 0.0009  | 0.0174               |
| Elovl6      | ENSMUSG00000041220.6  | 12.9             | 22.4                            | <b>1.7</b>                                   | 0.0015  | 0.0250               |
| Agfg1       | ENSMUSG00000026159.6  | 5.4              | 9.3                             | <b>1.7</b>                                   | 0.0028  | 0.0406               |
| Cd14        | ENSMUSG00000051439.6  | 7.6              | 13.1                            | <b>1.7</b>                                   | 0.0016  | 0.0269               |
| Itm2c       | ENSMUSG00000026223.9  | 17.0             | 29.3                            | <b>1.7</b>                                   | 0.0003  | 0.0062               |
| Obfc2a      | ENSMUSG00000026107.5  | 4.1              | 7.1                             | <b>1.7</b>                                   | 0.0015  | 0.0255               |
| H2afx       | ENSMUSG00000049932.2  | 4.9              | 8.3                             | <b>1.7</b>                                   | 0.0034  | 0.0472               |
| Impact      | ENSMUSG00000024423.5  | 4.2              | 7.2                             | <b>1.7</b>                                   | 0.0015  | 0.0250               |
| Cyr61       | ENSMUSG00000028195.3  | 4.6              | 7.8                             | <b>1.7</b>                                   | 0.0026  | 0.0383               |
| Ces2g       | ENSMUSG00000031877.8  | 24.3             | 41.4                            | <b>1.7</b>                                   | 0.0006  | 0.0125               |
| Ermp1       | ENSMUSG00000046324.6  | 10.7             | 18.3                            | <b>1.7</b>                                   | 0.0014  | 0.0243               |
| Ankrd56     | ENSMUSG00000045314.5  | 3.1              | 5.3                             | <b>1.7</b>                                   | 0.0014  | 0.0243               |
| Gusb        | ENSMUSG00000025534.10 | 8.4              | 14.2                            | <b>1.7</b>                                   | 0.0024  | 0.0362               |
| Mfsd6       | ENSMUSG00000041439.8  | 2.9              | 4.9                             | <b>1.7</b>                                   | 0.0027  | 0.0400               |
| Anpep       | ENSMUSG00000039062.8  | 44.6             | 74.8                            | <b>1.7</b>                                   | 0.0026  | 0.0383               |
| Sdf2l1      | ENSMUSG00000022769.7  | 15.0             | 25.1                            | <b>1.7</b>                                   | 0.0013  | 0.0230               |
| Tubb5       | ENSMUSG00000001525.9  | 30.8             | 51.5                            | <b>1.7</b>                                   | 0.0019  | 0.0299               |
| Slc48a1     | ENSMUSG00000081534.2  | 23.9             | 39.8                            | <b>1.7</b>                                   | 0.0019  | 0.0299               |
| Megf9       | ENSMUSG00000039270.3  | 4.4              | 7.3                             | <b>1.7</b>                                   | 0.0010  | 0.0182               |
| Creld2      | ENSMUSG00000023272.3  | 18.6             | 30.8                            | <b>1.7</b>                                   | 0.0014  | 0.0243               |
| Ly6a        | ENSMUSG00000075602.4  | 24.4             | 40.1                            | <b>1.6</b>                                   | 0.0034  | 0.0477               |
| Wdr1        | ENSMUSG00000005103.9  | 19.1             | 31.2                            | <b>1.6</b>                                   | 0.0012  | 0.0216               |
| Ostc        | ENSMUSG00000041084.7  | 58.8             | 94.7                            | <b>1.6</b>                                   | 0.0017  | 0.0276               |
| Gars        | ENSMUSG00000029777.9  | 27.6             | 44.3                            | <b>1.6</b>                                   | 0.0021  | 0.0324               |
| Gm1840      | ENSMUSG00000043192.3  | 35.7             | 56.8                            | <b>1.6</b>                                   | 0.0015  | 0.0255               |
| Arhgdia     | ENSMUSG00000025132.7  | 49.1             | 77.7                            | <b>1.6</b>                                   | 0.0028  | 0.0411               |

**Supplemental Table 5: Significantly altered transcripts in E2F7/8 deleted liver tumors vs. wildtype liver identified by RNA sequencing.**

| Gene Symbol   | Ensembl ID            | WT mean<br>(n=4) | 78DKO<br>tumor<br>mean<br>(n=4) | Fold<br>change<br>(WT vs.<br>78DKO<br>tumor) | P-value | adjusted P-<br>value |
|---------------|-----------------------|------------------|---------------------------------|----------------------------------------------|---------|----------------------|
| Cyp2j6        | ENSMUSG00000052914.4  | 15.2             | 23.8                            | <b>1.6</b>                                   | 0.0035  | 0.0488               |
| Gm10080       | ENSMUSG00000060467.2  | 115.1            | 178.8                           | <b>1.6</b>                                   | 0.0033  | 0.0466               |
| Hn1l          | ENSMUSG00000024165.8  | 8.7              | 13.4                            | <b>1.5</b>                                   | 0.0035  | 0.0483               |
| 5730437N04Rik | ENSMUSG00000004945.8  | 34.9             | 22.3                            | <b>-1.6</b>                                  | 0.0033  | 0.0466               |
| Abhd3         | ENSMUSG00000002475.9  | 39.9             | 25.4                            | <b>-1.6</b>                                  | 0.0036  | 0.0499               |
| Gm9846        | ENSMUSG00000050621.4  | 173.4            | 110.1                           | <b>-1.6</b>                                  | 0.0031  | 0.0443               |
| Cox7a2        | ENSMUSG00000032330.6  | 187.0            | 117.6                           | <b>-1.6</b>                                  | 0.0036  | 0.0493               |
| Sod2          | ENSMUSG00000006818.4  | 47.2             | 29.7                            | <b>-1.6</b>                                  | 0.0027  | 0.0400               |
| Rps2-ps13     | ENSMUSG000000081684.2 | 45.6             | 28.5                            | <b>-1.6</b>                                  | 0.0018  | 0.0288               |
| Slc25a16      | ENSMUSG000000071253.2 | 37.1             | 23.0                            | <b>-1.6</b>                                  | 0.0022  | 0.0343               |
| Scarb2        | ENSMUSG00000029426.7  | 55.3             | 34.3                            | <b>-1.6</b>                                  | 0.0025  | 0.0373               |
| Gm13436       | ENSMUSG000000083716.2 | 65.3             | 40.4                            | <b>-1.6</b>                                  | 0.0031  | 0.0443               |
| Ccdc107       | ENSMUSG000000028461.6 | 45.9             | 28.4                            | <b>-1.6</b>                                  | 0.0027  | 0.0400               |
| 0910001L09Rik | ENSMUSG000000050552.7 | 39.8             | 24.5                            | <b>-1.6</b>                                  | 0.0026  | 0.0383               |
| S100a1        | ENSMUSG000000044080.9 | 190.7            | 117.5                           | <b>-1.6</b>                                  | 0.0016  | 0.0262               |
| Rps25-ps1     | ENSMUSG000000067344.5 | 158.8            | 97.2                            | <b>-1.6</b>                                  | 0.0011  | 0.0203               |
| Gm7536        | ENSMUSG000000057036.5 | 73.7             | 45.1                            | <b>-1.6</b>                                  | 0.0017  | 0.0282               |
| AW112010      | ENSMUSG000000075010.3 | 187.0            | 114.0                           | <b>-1.6</b>                                  | 0.0013  | 0.0230               |
| Cyp2d40       | ENSMUSG000000068083.1 | 54.5             | 33.2                            | <b>-1.6</b>                                  | 0.0017  | 0.0276               |
| Gm8226        | ENSMUSG000000066452.4 | 26.0             | 15.8                            | <b>-1.6</b>                                  | 0.0024  | 0.0366               |
| Ndufa6        | ENSMUSG000000022450.5 | 348.7            | 211.9                           | <b>-1.6</b>                                  | 0.0020  | 0.0312               |
| Enpp3         | ENSMUSG000000019989.7 | 29.3             | 17.8                            | <b>-1.6</b>                                  | 0.0022  | 0.0343               |
| Pts           | ENSMUSG000000032067.5 | 24.7             | 14.9                            | <b>-1.7</b>                                  | 0.0035  | 0.0488               |
| Gm11273       | ENSMUSG000000079941.1 | 130.9            | 78.9                            | <b>-1.7</b>                                  | 0.0010  | 0.0182               |
| Fcgrt         | ENSMUSG000000003420.7 | 94.9             | 57.2                            | <b>-1.7</b>                                  | 0.0013  | 0.0224               |
| Fam125a       | ENSMUSG000000031813.7 | 26.6             | 15.9                            | <b>-1.7</b>                                  | 0.0018  | 0.0293               |
| Hint3         | ENSMUSG000000019791.5 | 76.5             | 45.9                            | <b>-1.7</b>                                  | 0.0030  | 0.0434               |
| Higd2a        | ENSMUSG000000025868.6 | 66.9             | 40.0                            | <b>-1.7</b>                                  | 0.0009  | 0.0165               |
| Sepw1         | ENSMUSG000000041571.7 | 74.6             | 44.6                            | <b>-1.7</b>                                  | 0.0011  | 0.0196               |
| Gm6265        | ENSMUSG000000066491.4 | 407.7            | 243.1                           | <b>-1.7</b>                                  | 0.0017  | 0.0276               |
| Tgds          | ENSMUSG000000022130.9 | 12.2             | 7.2                             | <b>-1.7</b>                                  | 0.0019  | 0.0299               |
| Acy3          | ENSMUSG000000024866.9 | 41.5             | 24.6                            | <b>-1.7</b>                                  | 0.0007  | 0.0141               |
| Dhrs4         | ENSMUSG000000022210.6 | 83.5             | 49.4                            | <b>-1.7</b>                                  | 0.0012  | 0.0216               |
| Slc25a48      | ENSMUSG000000021509.5 | 8.1              | 4.8                             | <b>-1.7</b>                                  | 0.0018  | 0.0288               |
| Rpl37a        | ENSMUSG000000046330.9 | 47.6             | 28.1                            | <b>-1.7</b>                                  | 0.0019  | 0.0305               |
| Phf17         | ENSMUSG000000025764.8 | 11.0             | 6.5                             | <b>-1.7</b>                                  | 0.0008  | 0.0149               |
| Rps17         | ENSMUSG000000061787.8 | 89.2             | 52.7                            | <b>-1.7</b>                                  | 0.0017  | 0.0282               |

**Supplemental Table 5: Significantly altered transcripts in E2F7/8 deleted liver tumors vs. wildtype liver identified by RNA sequencing.**

| Gene Symbol   | Ensembl ID            | WT mean<br>(n=4) | 78DKO<br>tumor<br>mean<br>(n=4) | Fold<br>change<br>(WT vs.<br>78DKO<br>tumor) | P-value | adjusted P-<br>value |
|---------------|-----------------------|------------------|---------------------------------|----------------------------------------------|---------|----------------------|
| Klf13         | ENSMUSG00000052040.7  | 12.8             | 7.6                             | <b>-1.7</b>                                  | 0.0034  | 0.0477               |
| Rps10-ps1     | ENSMUSG00000060438.3  | 143.6            | 84.7                            | <b>-1.7</b>                                  | 0.0006  | 0.0125               |
| Gm10294       | ENSMUSG00000081895.2  | 40.0             | 23.6                            | <b>-1.7</b>                                  | 0.0026  | 0.0383               |
| Naprt1        | ENSMUSG00000022574.6  | 36.4             | 21.4                            | <b>-1.7</b>                                  | 0.0006  | 0.0125               |
| C030044B11Rik | ENSMUSG00000086252.1  | 3.5              | 2.0                             | <b>-1.7</b>                                  | 0.0027  | 0.0396               |
| Rpsa-ps12     | ENSMUSG00000080746.2  | 30.5             | 17.9                            | <b>-1.7</b>                                  | 0.0008  | 0.0149               |
| Gm12166       | ENSMUSG00000069899.3  | 20.9             | 12.3                            | <b>-1.7</b>                                  | 0.0017  | 0.0282               |
| Gm10768       | ENSMUSG00000074828.2  | 23.5             | 13.8                            | <b>-1.7</b>                                  | 0.0005  | 0.0110               |
| Slc25a10      | ENSMUSG00000025792.3  | 53.3             | 31.2                            | <b>-1.7</b>                                  | 0.0006  | 0.0118               |
| Gm11687       | ENSMUSG00000082480.1  | 17.5             | 10.3                            | <b>-1.7</b>                                  | 0.0028  | 0.0411               |
| Gm5638        | ENSMUSG00000081084.1  | 106.2            | 62.1                            | <b>-1.7</b>                                  | 0.0004  | 0.0091               |
| Klf9          | ENSMUSG00000033863.1  | 37.0             | 21.6                            | <b>-1.7</b>                                  | 0.0014  | 0.0243               |
| Bckdha        | ENSMUSG00000060376.6  | 87.7             | 51.1                            | <b>-1.7</b>                                  | 0.0011  | 0.0196               |
| Klhl21        | ENSMUSG00000073700.3  | 7.4              | 4.3                             | <b>-1.7</b>                                  | 0.0006  | 0.0118               |
| Rp9           | ENSMUSG00000032239.8  | 30.1             | 17.6                            | <b>-1.7</b>                                  | 0.0013  | 0.0230               |
| Gm11249       | ENSMUSG00000083087.1  | 19.8             | 11.5                            | <b>-1.7</b>                                  | 0.0021  | 0.0324               |
| Gm5436        | ENSMUSG00000042962.4  | 133.9            | 77.4                            | <b>-1.7</b>                                  | 0.0006  | 0.0118               |
| Coq10b        | ENSMUSG00000025981.7  | 34.8             | 20.1                            | <b>-1.7</b>                                  | 0.0003  | 0.0062               |
| Lpin1         | ENSMUSG00000020593.7  | 34.3             | 19.8                            | <b>-1.7</b>                                  | 0.0022  | 0.0338               |
| Wdr45         | ENSMUSG00000039382.5  | 22.0             | 12.7                            | <b>-1.7</b>                                  | 0.0005  | 0.0100               |
| Lonp2         | ENSMUSG00000047866.11 | 89.1             | 51.2                            | <b>-1.7</b>                                  | 0.0018  | 0.0293               |
| 1300018J18Rik | ENSMUSG00000035757.9  | 71.3             | 40.9                            | <b>-1.7</b>                                  | 0.0014  | 0.0237               |
| Slc22a28      | ENSMUSG00000063590.3  | 35.2             | 20.2                            | <b>-1.7</b>                                  | 0.0014  | 0.0243               |
| Haus4         | ENSMUSG00000022177.8  | 10.3             | 5.9                             | <b>-1.7</b>                                  | 0.0022  | 0.0343               |
| Gm10269       | ENSMUSG00000091449.1  | 44.6             | 25.6                            | <b>-1.7</b>                                  | 0.0026  | 0.0383               |
| Shpk          | ENSMUSG00000005951.6  | 27.8             | 16.0                            | <b>-1.7</b>                                  | 0.0003  | 0.0072               |
| Mast3         | ENSMUSG00000031833.8  | 4.1              | 2.4                             | <b>-1.7</b>                                  | 0.0026  | 0.0389               |
| Hibadh        | ENSMUSG00000029776.9  | 191.5            | 109.6                           | <b>-1.7</b>                                  | 0.0016  | 0.0269               |
| Uqcr10        | ENSMUSG00000059534.8  | 160.2            | 91.6                            | <b>-1.7</b>                                  | 0.0006  | 0.0125               |
| Gm17150       | ENSMUSG00000091410.1  | 55.9             | 32.0                            | <b>-1.7</b>                                  | 0.0031  | 0.0439               |
| Rpl35a-ps5    | ENSMUSG00000067558.6  | 70.6             | 40.4                            | <b>-1.7</b>                                  | 0.0034  | 0.0472               |
| L2hgdh        | ENSMUSG00000020988.8  | 21.9             | 12.5                            | <b>-1.7</b>                                  | 0.0002  | 0.0041               |
| Serpina3l-ps  | ENSMUSG00000091157.1  | 158.6            | 90.6                            | <b>-1.8</b>                                  | 0.0005  | 0.0100               |
| Inhbe         | ENSMUSG00000047492.4  | 17.3             | 9.9                             | <b>-1.8</b>                                  | 0.0006  | 0.0125               |
| Rpl13-ps3     | ENSMUSG00000059835.1  | 39.7             | 22.7                            | <b>-1.8</b>                                  | 0.0011  | 0.0203               |
| Dmgdh         | ENSMUSG00000042102.6  | 125.8            | 71.6                            | <b>-1.8</b>                                  | 0.0023  | 0.0357               |
| Atp5k         | ENSMUSG00000050856.10 | 188.9            | 107.5                           | <b>-1.8</b>                                  | 0.0005  | 0.0100               |

**Supplemental Table 5: Significantly altered transcripts in E2F7/8 deleted liver tumors vs. wildtype liver identified by RNA sequencing.**

| Gene Symbol   | Ensembl ID           | WT mean<br>(n=4) | 78DKO<br>tumor<br>mean<br>(n=4) | Fold<br>change<br>(WT vs.<br>78DKO<br>tumor) | P-value | adjusted P-<br>value |
|---------------|----------------------|------------------|---------------------------------|----------------------------------------------|---------|----------------------|
| Eci1          | ENSMUSG00000024132.5 | 78.2             | 44.5                            | -1.8                                         | 0.0002  | 0.0051               |
| 2310011J03Rik | ENSMUSG00000020133.8 | 7.2              | 4.1                             | -1.8                                         | 0.0030  | 0.0428               |
| Suox          | ENSMUSG00000049858.7 | 74.2             | 42.1                            | -1.8                                         | 0.0002  | 0.0051               |
| Dedd2         | ENSMUSG00000054499.8 | 7.0              | 4.0                             | -1.8                                         | 0.0032  | 0.0454               |
| Ndufa4        | ENSMUSG00000029632.5 | 381.7            | 216.3                           | -1.8                                         | 0.0002  | 0.0051               |
| Trip4         | ENSMUSG00000032386.8 | 25.5             | 14.4                            | -1.8                                         | 0.0017  | 0.0282               |
| BC031353      | ENSMUSG00000034858.8 | 12.2             | 6.9                             | -1.8                                         | 0.0007  | 0.0133               |
| Sdhb          | ENSMUSG00000009863.8 | 171.5            | 96.9                            | -1.8                                         | 0.0007  | 0.0141               |
| Extl1         | ENSMUSG00000028838.5 | 3.9              | 2.2                             | -1.8                                         | 0.0024  | 0.0366               |
| Gm10713       | ENSMUSG00000074553.3 | 90.9             | 51.3                            | -1.8                                         | 0.0011  | 0.0196               |
| Ndufs6        | ENSMUSG00000021606.6 | 53.2             | 30.0                            | -1.8                                         | 0.0011  | 0.0203               |
| Slc25a42      | ENSMUSG00000002346.9 | 21.0             | 11.8                            | -1.8                                         | 0.0004  | 0.0091               |
| Scp2-ps2      | ENSMUSG00000058492.4 | 2470.3           | 1389.8                          | -1.8                                         | 0.0032  | 0.0454               |
| Aes           | ENSMUSG00000054452.8 | 228.4            | 128.3                           | -1.8                                         | 0.0015  | 0.0255               |
| Csrnp1        | ENSMUSG00000032515.7 | 3.8              | 2.1                             | -1.8                                         | 0.0025  | 0.0378               |
| Zfp185        | ENSMUSG00000031351.8 | 1.5              | 0.9                             | -1.8                                         | 0.0020  | 0.0319               |
| Ido2          | ENSMUSG00000031549.9 | 56.0             | 31.3                            | -1.8                                         | 0.0005  | 0.0110               |
| Pebp1         | ENSMUSG00000032959.6 | 84.7             | 47.4                            | -1.8                                         | 0.0002  | 0.0041               |
| 2610528J11Rik | ENSMUSG00000028536.6 | 14.5             | 8.1                             | -1.8                                         | 0.0024  | 0.0362               |
| Gm11225       | ENSMUSG00000082368.1 | 32.5             | 18.1                            | -1.8                                         | 0.0004  | 0.0091               |
| Clec4g        | ENSMUSG00000074491.3 | 32.5             | 18.1                            | -1.8                                         | 0.0020  | 0.0319               |
| Rpl18-ps2     | ENSMUSG00000053173.8 | 44.7             | 24.9                            | -1.8                                         | 0.0011  | 0.0203               |
| Ndufa5        | ENSMUSG00000023089.6 | 135.5            | 75.4                            | -1.8                                         | 0.0010  | 0.0189               |
| Rpl34-ps1     | ENSMUSG00000068396.7 | 220.3            | 122.6                           | -1.8                                         | 0.0002  | 0.0041               |
| Apol7a        | ENSMUSG00000010601.5 | 66.1             | 36.7                            | -1.8                                         | 0.0003  | 0.0072               |
| Gm10362       | ENSMUSG00000072489.2 | 31.7             | 17.6                            | -1.8                                         | 0.0010  | 0.0189               |
| Gabarapl1     | ENSMUSG00000030161.6 | 232.2            | 128.7                           | -1.8                                         | 0.0031  | 0.0439               |
| F630206G17Rik | ENSMUSG00000086686.1 | 4.6              | 2.6                             | -1.8                                         | 0.0018  | 0.0288               |
| Nxt2          | ENSMUSG00000042271.7 | 16.8             | 9.3                             | -1.8                                         | 0.0002  | 0.0041               |
| 2810405K02Rik | ENSMUSG00000029059.3 | 35.5             | 19.7                            | -1.8                                         | 0.0008  | 0.0157               |
| Slc2a9        | ENSMUSG00000005107.7 | 29.4             | 16.3                            | -1.8                                         | 0.0027  | 0.0400               |
| Gm8017        | ENSMUSG00000063427.6 | 177.6            | 98.0                            | -1.8                                         | 0.0001  | 0.0029               |
| Casp7         | ENSMUSG00000025076.9 | 16.3             | 9.0                             | -1.8                                         | 0.0004  | 0.0091               |
| Gm12034       | ENSMUSG00000083878.3 | 75.8             | 41.7                            | -1.8                                         | 0.0006  | 0.0125               |
| Mosc1         | ENSMUSG00000026621.6 | 206.4            | 113.5                           | -1.8                                         | 0.0017  | 0.0282               |
| Serpina3a     | ENSMUSG00000041536.7 | 73.5             | 40.4                            | -1.8                                         | 0.0003  | 0.0062               |
| Gm9786        | ENSMUSG00000043801.6 | 357.3            | 196.4                           | -1.8                                         | 0.0001  | 0.0029               |

**Supplemental Table 5: Significantly altered transcripts in E2F7/8 deleted liver tumors vs. wildtype liver identified by RNA sequencing.**

| Gene Symbol | Ensembl ID            | WT mean<br>(n=4) | 78DKO<br>tumor<br>mean<br>(n=4) | Fold<br>change<br>(WT vs.<br>78DKO<br>tumor) | P-value | adjusted P-<br>value |
|-------------|-----------------------|------------------|---------------------------------|----------------------------------------------|---------|----------------------|
| Gm14450     | ENSMUSG00000081661.1  | 586.8            | 322.1                           | -1.8                                         | 0.0001  | 0.0016               |
| Nr1h4       | ENSMUSG00000047638.9  | 63.7             | 34.9                            | -1.8                                         | 0.0012  | 0.0216               |
| Slc35e3     | ENSMUSG00000060181.5  | 4.6              | 2.5                             | -1.8                                         | 0.0006  | 0.0118               |
| Nfkbia      | ENSMUSG00000021025.7  | 36.3             | 19.8                            | -1.8                                         | 0.0001  | 0.0016               |
| Gm4913      | ENSMUSG00000083151.1  | 32.6             | 17.8                            | -1.8                                         | 0.0001  | 0.0029               |
| Gm13611     | ENSMUSG00000066068.4  | 41.6             | 22.7                            | -1.8                                         | 0.0026  | 0.0389               |
| Cisd1       | ENSMUSG00000037710.8  | 139.8            | 76.1                            | -1.8                                         | 0.0001  | 0.0029               |
| Akr7a5      | ENSMUSG00000028743.7  | 83.7             | 45.6                            | -1.8                                         | 0.0002  | 0.0041               |
| Acadm       | ENSMUSG00000062908.6  | 175.8            | 95.6                            | -1.8                                         | 0.0007  | 0.0133               |
| Fau         | ENSMUSG00000038274.4  | 153.4            | 83.3                            | -1.8                                         | 0.0001  | 0.0016               |
| Glo1        | ENSMUSG00000024026.6  | 146.7            | 79.6                            | -1.8                                         | 0.0004  | 0.0091               |
| Ttc36       | ENSMUSG00000039438.6  | 449.5            | 243.8                           | -1.8                                         | 0.0002  | 0.0041               |
| Rgs16       | ENSMUSG00000026475.7  | 29.6             | 16.0                            | -1.8                                         | 0.0035  | 0.0483               |
| Gbp11       | ENSMUSG00000092021.1  | 20.2             | 11.0                            | -1.8                                         | 0.0006  | 0.0125               |
| Cyp2j5      | ENSMUSG00000052520.7  | 292.7            | 158.6                           | -1.8                                         | 0.0034  | 0.0477               |
| Nfu1        | ENSMUSG00000029993.10 | 23.4             | 12.6                            | -1.8                                         | 0.0014  | 0.0237               |
| Gm10925     | ENSMUSG00000090378.1  | 102.1            | 55.1                            | -1.9                                         | 0.0001  | 0.0016               |
| Slc25a15    | ENSMUSG00000031482.8  | 127.4            | 68.7                            | -1.9                                         | 0.0008  | 0.0157               |
| Gm9843      | ENSMUSG00000050299.7  | 309.7            | 167.0                           | -1.9                                         | 0.0001  | 0.0016               |
| Gchfr       | ENSMUSG00000046814.3  | 93.8             | 50.5                            | -1.9                                         | 0.0002  | 0.0051               |
| Pdpf        | ENSMUSG00000016344.8  | 37.5             | 20.2                            | -1.9                                         | 0.0022  | 0.0343               |
| Cyp3a59     | ENSMUSG00000061292.6  | 108.9            | 58.6                            | -1.9                                         | 0.0015  | 0.0255               |
| Ripk2       | ENSMUSG00000041135.6  | 6.5              | 3.5                             | -1.9                                         | 0.0015  | 0.0250               |
| Gm10319     | ENSMUSG00000071204.4  | 228.0            | 122.5                           | -1.9                                         | 0.0003  | 0.0072               |
| Decr2       | ENSMUSG00000036775.6  | 128.6            | 69.1                            | -1.9                                         | 0.0019  | 0.0299               |
| Rpl36       | ENSMUSG00000057863.5  | 31.5             | 16.9                            | -1.9                                         | 0.0025  | 0.0373               |
| Slc22a30    | ENSMUSG00000052562.8  | 62.3             | 33.4                            | -1.9                                         | 0.0007  | 0.0141               |
| Tmem86b     | ENSMUSG00000045282.6  | 119.2            | 63.8                            | -1.9                                         | 0.0001  | 0.0029               |
| Gm8731      | ENSMUSG00000080779.1  | 35.4             | 18.9                            | -1.9                                         | 0.0021  | 0.0324               |
| C8b         | ENSMUSG00000029656.7  | 180.9            | 96.6                            | -1.9                                         | 0.0012  | 0.0216               |
| Ethe1       | ENSMUSG00000064254.6  | 23.2             | 12.4                            | -1.9                                         | 0.0006  | 0.0125               |
| Gm8225      | ENSMUSG00000068604.4  | 9.1              | 4.8                             | -1.9                                         | 0.0028  | 0.0411               |
| Cebpa       | ENSMUSG00000034957.9  | 110.5            | 58.9                            | -1.9                                         | 0.0003  | 0.0062               |
| Gm14337     | ENSMUSG00000081700.1  | 226.6            | 120.1                           | -1.9                                         | 0.0016  | 0.0262               |
| Deb1        | ENSMUSG00000032526.9  | 67.0             | 35.5                            | -1.9                                         | 0.0001  | 0.0029               |
| Uqcr11      | ENSMUSG00000020163.6  | 84.6             | 44.8                            | -1.9                                         | 0.0002  | 0.0041               |
| Ugt2b5      | ENSMUSG00000054630.6  | 403.1            | 212.9                           | -1.9                                         | 0.0027  | 0.0400               |



**Supplemental Table 5: Significantly altered transcripts in E2F7/8 deleted liver tumors vs. wildtype liver identified by RNA sequencing.**

| Gene Symbol   | Ensembl ID           | WT mean<br>(n=4) | 78DKO<br>tumor<br>mean<br>(n=4) | Fold<br>change<br>(WT vs.<br>78DKO<br>tumor) | P-value | adjusted P-<br>value |
|---------------|----------------------|------------------|---------------------------------|----------------------------------------------|---------|----------------------|
| Gstk1         | ENSMUSG00000029864.5 | 225.2            | 118.8                           | -1.9                                         | 0.0001  | 0.0029               |
| Ephx2         | ENSMUSG00000022040.6 | 334.2            | 176.2                           | -1.9                                         | 0.0036  | 0.0493               |
| Tmem205       | ENSMUSG00000040883.8 | 206.1            | 108.6                           | -1.9                                         | 0.0002  | 0.0051               |
| Gm11428       | ENSMUSG00000069792.5 | 36.9             | 19.4                            | -1.9                                         | 0.0006  | 0.0125               |
| Apon          | ENSMUSG00000051716.5 | 359.0            | 189.1                           | -1.9                                         | 0.0015  | 0.0255               |
| Klf15         | ENSMUSG00000030087.5 | 57.5             | 30.2                            | -1.9                                         | 0.0001  | 0.0016               |
| Rps18-ps1     | ENSMUSG00000083914.2 | 33.5             | 17.6                            | -1.9                                         | 0.0005  | 0.0110               |
| Cd5l          | ENSMUSG00000015854.6 | 44.5             | 23.4                            | -1.9                                         | 0.0003  | 0.0072               |
| Bag4          | ENSMUSG00000037316.8 | 8.7              | 4.6                             | -1.9                                         | 0.0023  | 0.0357               |
| Hoga1         | ENSMUSG00000025176.8 | 138.8            | 72.8                            | -1.9                                         | 0.0024  | 0.0362               |
| Hao           | ENSMUSG00000000673.8 | 267.7            | 140.4                           | -1.9                                         | 0.0006  | 0.0125               |
| C1qa          | ENSMUSG00000036887.5 | 30.7             | 16.1                            | -1.9                                         | 0.0001  | 0.0016               |
| Pbld2         | ENSMUSG00000020068.4 | 71.9             | 37.7                            | -1.9                                         | 0.0001  | 0.0016               |
| 1700019G17Rik | ENSMUSG00000068299.5 | 92.4             | 48.3                            | -1.9                                         | 0.0008  | 0.0149               |
| Dact2         | ENSMUSG00000048826.6 | 5.1              | 2.6                             | -1.9                                         | 0.0004  | 0.0082               |
| Gm15118       | ENSMUSG00000083854.1 | 95.6             | 49.7                            | -1.9                                         | 0.0001  | 0.0029               |
| Timm9         | ENSMUSG00000021079.8 | 19.1             | 9.9                             | -1.9                                         | 0.0031  | 0.0443               |
| Bmp2          | ENSMUSG00000027358.6 | 3.9              | 2.0                             | -1.9                                         | 0.0013  | 0.0230               |
| Gm12247       | ENSMUSG00000081223.1 | 12.4             | 6.4                             | -1.9                                         | 0.0018  | 0.0288               |
| Ypel3         | ENSMUSG00000042675.9 | 30.3             | 15.7                            | -1.9                                         | 0.0031  | 0.0443               |
| Cyp2d34       | ENSMUSG00000062185.5 | 24.6             | 12.7                            | -1.9                                         | 0.0001  | 0.0016               |
| Cox6b1        | ENSMUSG00000036751.6 | 181.1            | 93.3                            | -1.9                                         | 0.0002  | 0.0041               |
| Cxcl12        | ENSMUSG00000061353.5 | 141.6            | 72.9                            | -1.9                                         | 0.0006  | 0.0125               |
| Fam13a        | ENSMUSG00000037709.7 | 7.7              | 4.0                             | -1.9                                         | 0.0014  | 0.0237               |
| Hyi           | ENSMUSG00000006395.9 | 25.1             | 12.8                            | -2.0                                         | 0.0030  | 0.0428               |
| Olfml1        | ENSMUSG00000051041.7 | 13.6             | 7.0                             | -2.0                                         | 0.0001  | 0.0016               |
| Gm16437       | ENSMUSG00000024761.2 | 35.5             | 18.1                            | -2.0                                         | 0.0006  | 0.0125               |
| Ugt2b38       | ENSMUSG00000061906.5 | 158.5            | 80.9                            | -2.0                                         | 0.0001  | 0.0016               |
| BC026585      | ENSMUSG00000033488.5 | 8.0              | 4.1                             | -2.0                                         | 0.0012  | 0.0216               |
| Per3          | ENSMUSG00000028957.6 | 6.8              | 3.5                             | -2.0                                         | 0.0028  | 0.0406               |
| Cd300e        | ENSMUSG00000048498.7 | 2.8              | 1.4                             | -2.0                                         | 0.0034  | 0.0477               |
| Gm5403        | ENSMUSG00000083250.1 | 1.7              | 0.9                             | -2.0                                         | 0.0030  | 0.0428               |
| Gm10063       | ENSMUSG00000059333.1 | 31.1             | 15.8                            | -2.0                                         | 0.0011  | 0.0203               |
| Timd4         | ENSMUSG00000055546.6 | 4.4              | 2.2                             | -2.0                                         | 0.0025  | 0.0378               |
| Hint2         | ENSMUSG00000028470.4 | 123.7            | 62.8                            | -2.0                                         | 0.0001  | 0.0029               |
| Cyp26b1       | ENSMUSG00000063415.5 | 1.4              | 0.7                             | -2.0                                         | 0.0022  | 0.0338               |
| Dera          | ENSMUSG00000030225.8 | 30.2             | 15.3                            | -2.0                                         | 0.0001  | 0.0016               |

**Supplemental Table 5: Significantly altered transcripts in E2F7/8 deleted liver tumors vs. wildtype liver identified by RNA sequencing.**

| Gene Symbol   | Ensembl ID            | WT mean<br>(n=4) | 78DKO<br>tumor<br>mean<br>(n=4) | Fold<br>change<br>(WT vs.<br>78DKO<br>tumor) | P-value | adjusted P-<br>value |
|---------------|-----------------------|------------------|---------------------------------|----------------------------------------------|---------|----------------------|
| Prdx5         | ENSMUSG00000024953.9  | 126.1            | 63.7                            | <b>-2.0</b>                                  | 0.0004  | 0.0082               |
| Rpl28         | ENSMUSG00000030432.6  | 87.3             | 43.9                            | <b>-2.0</b>                                  | 0.0006  | 0.0118               |
| Pank1         | ENSMUSG00000033610.8  | 130.9            | 65.8                            | <b>-2.0</b>                                  | 0.0001  | 0.0016               |
| Atoh8         | ENSMUSG00000037621.7  | 6.1              | 3.1                             | <b>-2.0</b>                                  | 0.0029  | 0.0417               |
| Agphd1        | ENSMUSG00000035878.7  | 19.2             | 9.6                             | <b>-2.0</b>                                  | 0.0001  | 0.0016               |
| Tlr2          | ENSMUSG00000027995.9  | 2.6              | 1.3                             | <b>-2.0</b>                                  | 0.0012  | 0.0210               |
| Fbp1          | ENSMUSG00000069805.4  | 577.3            | 289.0                           | <b>-2.0</b>                                  | 0.0019  | 0.0305               |
| Plekhb1       | ENSMUSG00000030701.10 | 40.5             | 20.3                            | <b>-2.0</b>                                  | 0.0001  | 0.0016               |
| Gstt2         | ENSMUSG00000033318.6  | 62.0             | 31.0                            | <b>-2.0</b>                                  | 0.0001  | 0.0016               |
| Gcdh          | ENSMUSG00000003809.7  | 243.9            | 121.5                           | <b>-2.0</b>                                  | 0.0007  | 0.0141               |
| Gm13443       | ENSMUSG00000075391.4  | 519.8            | 258.6                           | <b>-2.0</b>                                  | 0.0001  | 0.0016               |
| Ech1          | ENSMUSG00000053898.6  | 407.4            | 202.5                           | <b>-2.0</b>                                  | 0.0001  | 0.0016               |
| Clec4f        | ENSMUSG00000014542.2  | 53.9             | 26.7                            | <b>-2.0</b>                                  | 0.0009  | 0.0165               |
| Gm11361       | ENSMUSG00000061330.6  | 41.9             | 20.8                            | <b>-2.0</b>                                  | 0.0002  | 0.0051               |
| 1190003J15Rik | ENSMUSG00000025481.5  | 212.1            | 105.0                           | <b>-2.0</b>                                  | 0.0001  | 0.0029               |
| Zkscan14      | ENSMUSG00000029627.10 | 4.0              | 2.0                             | <b>-2.0</b>                                  | 0.0012  | 0.0210               |
| Clec2d        | ENSMUSG00000030157.5  | 13.6             | 6.7                             | <b>-2.0</b>                                  | 0.0003  | 0.0072               |
| 9530008L14Rik | ENSMUSG00000058022.6  | 145.8            | 72.1                            | <b>-2.0</b>                                  | 0.0002  | 0.0051               |
| Mbl2          | ENSMUSG00000024863.5  | 430.7            | 212.1                           | <b>-2.0</b>                                  | 0.0004  | 0.0082               |
| Aadat         | ENSMUSG00000057228.4  | 62.8             | 30.9                            | <b>-2.0</b>                                  | 0.0001  | 0.0016               |
| Gm11686       | ENSMUSG00000080711.3  | 47.4             | 23.3                            | <b>-2.0</b>                                  | 0.0011  | 0.0196               |
| Gm4459        | ENSMUSG00000083626.1  | 79.4             | 39.0                            | <b>-2.0</b>                                  | 0.0001  | 0.0016               |
| Lipc          | ENSMUSG00000032207.8  | 132.7            | 65.0                            | <b>-2.0</b>                                  | 0.0002  | 0.0041               |
| Gm11808       | ENSMUSG00000068240.3  | 156.6            | 76.7                            | <b>-2.0</b>                                  | 0.0001  | 0.0016               |
| Cmb1          | ENSMUSG00000022235.8  | 140.1            | 68.6                            | <b>-2.0</b>                                  | 0.0006  | 0.0125               |
| Nr1i3         | ENSMUSG00000005677.7  | 78.1             | 38.1                            | <b>-2.1</b>                                  | 0.0007  | 0.0133               |
| Oaz1          | ENSMUSG00000035242.8  | 228.0            | 111.1                           | <b>-2.1</b>                                  | 0.0001  | 0.0016               |
| Al317395      | ENSMUSG00000038522.4  | 22.4             | 10.9                            | <b>-2.1</b>                                  | 0.0001  | 0.0016               |
| Ugt2b37       | ENSMUSG00000057425.3  | 67.2             | 32.7                            | <b>-2.1</b>                                  | 0.0001  | 0.0016               |
| Ndufb11       | ENSMUSG00000031059.9  | 91.9             | 44.7                            | <b>-2.1</b>                                  | 0.0001  | 0.0016               |
| Gypc          | ENSMUSG00000090523.2  | 6.5              | 3.1                             | <b>-2.1</b>                                  | 0.0005  | 0.0100               |
| Fzd8          | ENSMUSG00000036904.5  | 5.7              | 2.8                             | <b>-2.1</b>                                  | 0.0001  | 0.0016               |
| Igfals        | ENSMUSG00000046070.7  | 53.8             | 26.0                            | <b>-2.1</b>                                  | 0.0001  | 0.0016               |
| Saa4          | ENSMUSG00000040017.7  | 257.0            | 124.1                           | <b>-2.1</b>                                  | 0.0012  | 0.0216               |
| Creb3l3       | ENSMUSG00000035041.8  | 106.3            | 51.2                            | <b>-2.1</b>                                  | 0.0009  | 0.0165               |
| Kynu          | ENSMUSG00000026866.9  | 66.9             | 32.2                            | <b>-2.1</b>                                  | 0.0002  | 0.0041               |
| Kcnk5         | ENSMUSG00000023243.8  | 7.4              | 3.6                             | <b>-2.1</b>                                  | 0.0018  | 0.0288               |

**Supplemental Table 5: Significantly altered transcripts in E2F7/8 deleted liver tumors vs. wildtype liver identified by RNA sequencing.**

| Gene Symbol | Ensembl ID            | WT mean<br>(n=4) | 78DKO<br>tumor<br>mean<br>(n=4) | Fold<br>change<br>(WT vs.<br>78DKO<br>tumor) | P-value | adjusted P-<br>value |
|-------------|-----------------------|------------------|---------------------------------|----------------------------------------------|---------|----------------------|
| Aspg        | ENSMUSG000000037686.5 | 27.2             | 13.1                            | -2.1                                         | 0.0003  | 0.0062               |
| Gch1        | ENSMUSG000000037580.9 | 49.4             | 23.7                            | -2.1                                         | 0.0001  | 0.0016               |
| Gnat1       | ENSMUSG000000034837.7 | 8.7              | 4.2                             | -2.1                                         | 0.0001  | 0.0016               |
| Bglap-rs1   | ENSMUSG000000074489.3 | 1.7              | 0.8                             | -2.1                                         | 0.0024  | 0.0366               |
| Mt2         | ENSMUSG000000031762.6 | 177.2            | 84.4                            | -2.1                                         | 0.0002  | 0.0051               |
| Raet1d      | ENSMUSG000000078452.2 | 8.0              | 3.8                             | -2.1                                         | 0.0004  | 0.0082               |
| Gm4285      | ENSMUSG000000085829.1 | 4.1              | 2.0                             | -2.1                                         | 0.0033  | 0.0460               |
| Gm14303     | ENSMUSG000000081344.3 | 1173.8           | 557.7                           | -2.1                                         | 0.0001  | 0.0016               |
| Hsd3b4      | ENSMUSG000000056351.5 | 5.0              | 2.4                             | -2.1                                         | 0.0012  | 0.0210               |
| D10Jhu81e   | ENSMUSG000000053329.6 | 57.0             | 27.0                            | -2.1                                         | 0.0001  | 0.0016               |
| Gm10681     | ENSMUSG000000074380.2 | 4.8              | 2.3                             | -2.1                                         | 0.0014  | 0.0243               |
| MacroD1     | ENSMUSG000000036278.6 | 16.1             | 7.6                             | -2.1                                         | 0.0029  | 0.0423               |
| Cox7c       | ENSMUSG000000017778.8 | 267.5            | 126.3                           | -2.1                                         | 0.0001  | 0.0016               |
| Ldhd        | ENSMUSG000000031958.9 | 55.4             | 26.0                            | -2.1                                         | 0.0001  | 0.0016               |
| Pim3        | ENSMUSG000000035828.9 | 9.3              | 4.3                             | -2.1                                         | 0.0001  | 0.0016               |
| Mn1         | ENSMUSG000000070576.4 | 1.5              | 0.7                             | -2.1                                         | 0.0014  | 0.0243               |
| Cyp2d12     | ENSMUSG000000057138.5 | 85.7             | 40.1                            | -2.1                                         | 0.0001  | 0.0016               |
| Ces2a       | ENSMUSG000000055730.8 | 201.7            | 93.8                            | -2.2                                         | 0.0001  | 0.0016               |
| Sult1b1     | ENSMUSG000000029269.5 | 41.1             | 19.1                            | -2.2                                         | 0.0001  | 0.0016               |
| Sepx1       | ENSMUSG000000075705.6 | 389.1            | 180.7                           | -2.2                                         | 0.0001  | 0.0016               |
| Cyp2d11     | ENSMUSG000000068085.5 | 185.2            | 86.0                            | -2.2                                         | 0.0001  | 0.0016               |
| Serpine2    | ENSMUSG000000026249.4 | 12.4             | 5.8                             | -2.2                                         | 0.0001  | 0.0029               |
| Pecr        | ENSMUSG000000026189.7 | 141.1            | 65.4                            | -2.2                                         | 0.0003  | 0.0062               |
| Mrps36      | ENSMUSG000000061474.5 | 7.9              | 3.6                             | -2.2                                         | 0.0022  | 0.0338               |
| Gm8835      | ENSMUSG000000092457.1 | 3.8              | 1.8                             | -2.2                                         | 0.0015  | 0.0255               |
| Saa2        | ENSMUSG000000057465.4 | 49.5             | 22.8                            | -2.2                                         | 0.0003  | 0.0062               |
| Fxyd1       | ENSMUSG000000036570.7 | 317.8            | 146.7                           | -2.2                                         | 0.0001  | 0.0016               |
| Rps29       | ENSMUSG000000034892.8 | 131.4            | 60.6                            | -2.2                                         | 0.0001  | 0.0016               |
| Ndufs7      | ENSMUSG000000020153.8 | 50.6             | 23.3                            | -2.2                                         | 0.0001  | 0.0016               |
| Orm2        | ENSMUSG000000061540.3 | 132.1            | 60.6                            | -2.2                                         | 0.0001  | 0.0016               |
| Fbxo21      | ENSMUSG000000032898.6 | 45.2             | 20.7                            | -2.2                                         | 0.0002  | 0.0051               |
| Slc25a34    | ENSMUSG000000040740.7 | 1.1              | 0.5                             | -2.2                                         | 0.0023  | 0.0357               |
| Ces1g       | ENSMUSG000000057074.6 | 82.1             | 37.5                            | -2.2                                         | 0.0001  | 0.0016               |
| Id3         | ENSMUSG000000007872.3 | 34.9             | 15.9                            | -2.2                                         | 0.0002  | 0.0051               |
| Pex16       | ENSMUSG000000027222.8 | 52.5             | 23.9                            | -2.2                                         | 0.0001  | 0.0016               |
| Gm10222     | ENSMUSG000000067736.1 | 56.7             | 25.8                            | -2.2                                         | 0.0003  | 0.0062               |
| Hebp1       | ENSMUSG000000042770.6 | 278.7            | 126.8                           | -2.2                                         | 0.0001  | 0.0016               |

**Supplemental Table 5: Significantly altered transcripts in E2F7/8 deleted liver tumors vs. wildtype liver identified by RNA sequencing.**

| Gene Symbol   | Ensembl ID           | WT mean<br>(n=4) | 78DKO<br>tumor<br>mean<br>(n=4) | Fold<br>change<br>(WT vs.<br>78DKO<br>tumor) | P-value | adjusted P-<br>value |
|---------------|----------------------|------------------|---------------------------------|----------------------------------------------|---------|----------------------|
| Rasgef1b      | ENSMUSG00000029333.8 | 12.5             | 5.7                             | -2.2                                         | 0.0004  | 0.0091               |
| 1810027O10Rik | ENSMUSG00000070394.4 | 96.5             | 43.9                            | -2.2                                         | 0.0001  | 0.0016               |
| Orm3          | ENSMUSG00000028359.4 | 42.5             | 19.3                            | -2.2                                         | 0.0001  | 0.0016               |
| Cyp2j9        | ENSMUSG00000015224.9 | 2.3              | 1.1                             | -2.2                                         | 0.0035  | 0.0488               |
| Cyp3a57       | ENSMUSG00000070419.5 | 36.1             | 16.4                            | -2.2                                         | 0.0001  | 0.0016               |
| Pbld1         | ENSMUSG00000020072.7 | 82.6             | 37.3                            | -2.2                                         | 0.0001  | 0.0016               |
| Mzt2          | ENSMUSG00000022671.6 | 12.4             | 5.6                             | -2.2                                         | 0.0001  | 0.0016               |
| Uqcrq         | ENSMUSG00000044894.8 | 626.5            | 281.7                           | -2.2                                         | 0.0001  | 0.0016               |
| Timm13        | ENSMUSG00000020219.6 | 18.3             | 8.2                             | -2.2                                         | 0.0001  | 0.0016               |
| Ces1h         | ENSMUSG00000074156.3 | 5.3              | 2.4                             | -2.2                                         | 0.0002  | 0.0051               |
| Col6a2        | ENSMUSG00000020241.7 | 2.0              | 0.9                             | -2.2                                         | 0.0009  | 0.0165               |
| Plxnc1        | ENSMUSG00000074785.3 | 2.4              | 1.1                             | -2.2                                         | 0.0008  | 0.0157               |
| Slc7a2        | ENSMUSG00000031596.9 | 124.4            | 55.1                            | -2.3                                         | 0.0002  | 0.0051               |
| Hand2         | ENSMUSG00000038193.3 | 1.9              | 0.8                             | -2.3                                         | 0.0010  | 0.0182               |
| Aqp11         | ENSMUSG00000042797.7 | 51.5             | 22.7                            | -2.3                                         | 0.0001  | 0.0016               |
| P2ry1         | ENSMUSG00000027765.1 | 6.5              | 2.8                             | -2.3                                         | 0.0001  | 0.0016               |
| 2310010J17Rik | ENSMUSG00000085650.2 | 10.8             | 4.8                             | -2.3                                         | 0.0024  | 0.0366               |
| Nudt16        | ENSMUSG00000032565.7 | 8.2              | 3.6                             | -2.3                                         | 0.0001  | 0.0016               |
| BC024139      | ENSMUSG00000044361.8 | 3.2              | 1.4                             | -2.3                                         | 0.0002  | 0.0051               |
| Mmd           | ENSMUSG00000003948.9 | 71.6             | 31.4                            | -2.3                                         | 0.0001  | 0.0016               |
| Gm13392       | ENSMUSG00000083373.1 | 201.4            | 88.0                            | -2.3                                         | 0.0018  | 0.0293               |
| Kcnn2         | ENSMUSG00000054477.7 | 24.2             | 10.5                            | -2.3                                         | 0.0010  | 0.0182               |
| Inca1         | ENSMUSG00000057054.4 | 16.4             | 7.1                             | -2.3                                         | 0.0002  | 0.0051               |
| Dpyd          | ENSMUSG00000033308.9 | 153.3            | 66.3                            | -2.3                                         | 0.0001  | 0.0016               |
| Ces3b         | ENSMUSG00000062181.7 | 466.4            | 201.3                           | -2.3                                         | 0.0012  | 0.0216               |
| Thrsp         | ENSMUSG00000035686.7 | 678.2            | 292.6                           | -2.3                                         | 0.0007  | 0.0141               |
| Rnf152        | ENSMUSG00000047496.5 | 3.0              | 1.3                             | -2.3                                         | 0.0001  | 0.0016               |
| BC021614      | ENSMUSG00000058216.6 | 1313.9           | 562.9                           | -2.3                                         | 0.0007  | 0.0133               |
| Nat8b         | ENSMUSG00000089634.1 | 73.1             | 31.3                            | -2.3                                         | 0.0001  | 0.0016               |
| Chchd10       | ENSMUSG00000049422.6 | 184.9            | 79.1                            | -2.3                                         | 0.0001  | 0.0016               |
| Ndufb7        | ENSMUSG00000033938.5 | 44.1             | 18.9                            | -2.3                                         | 0.0001  | 0.0016               |
| Gm7866        | ENSMUSG00000061390.3 | 108.5            | 46.4                            | -2.3                                         | 0.0001  | 0.0016               |
| Gm11507       | ENSMUSG00000044639.3 | 10.0             | 4.3                             | -2.3                                         | 0.0029  | 0.0423               |
| Gm11407       | ENSMUSG00000082179.1 | 4.5              | 1.9                             | -2.3                                         | 0.0006  | 0.0118               |
| Gm13340       | ENSMUSG00000083563.1 | 79.7             | 33.9                            | -2.4                                         | 0.0001  | 0.0016               |
| Gm5054        | ENSMUSG00000083812.2 | 8.6              | 3.7                             | -2.4                                         | 0.0014  | 0.0237               |
| Pdgfra        | ENSMUSG00000029231.9 | 1.4              | 0.6                             | -2.4                                         | 0.0028  | 0.0411               |

**Supplemental Table 5: Significantly altered transcripts in E2F7/8 deleted liver tumors vs. wildtype liver identified by RNA sequencing.**

| Gene Symbol   | Ensembl ID            | WT mean<br>(n=4) | 78DKO<br>tumor<br>mean<br>(n=4) | Fold<br>change<br>(WT vs.<br>78DKO<br>tumor) | P-value | adjusted P-<br>value |
|---------------|-----------------------|------------------|---------------------------------|----------------------------------------------|---------|----------------------|
| Tymp          | ENSMUSG00000022615.6  | 39.5             | 16.6                            | -2.4                                         | 0.0001  | 0.0016               |
| Dnajc12       | ENSMUSG000000036764.5 | 34.5             | 14.5                            | -2.4                                         | 0.0002  | 0.0041               |
| Ugt2b1        | ENSMUSG000000035836.2 | 366.7            | 153.9                           | -2.4                                         | 0.0014  | 0.0243               |
| Prdx6-ps2     | ENSMUSG000000083737.1 | 10.9             | 4.6                             | -2.4                                         | 0.0001  | 0.0029               |
| Eci3          | ENSMUSG000000021416.5 | 17.3             | 7.2                             | -2.4                                         | 0.0001  | 0.0029               |
| Angptl4       | ENSMUSG00000002289.9  | 34.9             | 14.6                            | -2.4                                         | 0.0001  | 0.0016               |
| Csrp3         | ENSMUSG000000030470.7 | 25.5             | 10.6                            | -2.4                                         | 0.0001  | 0.0029               |
| Gm5612        | ENSMUSG000000074501.4 | 12.1             | 5.0                             | -2.4                                         | 0.0010  | 0.0189               |
| Aspdh         | ENSMUSG000000038704.4 | 49.5             | 20.5                            | -2.4                                         | 0.0001  | 0.0016               |
| Polg2         | ENSMUSG000000020718.6 | 4.3              | 1.8                             | -2.4                                         | 0.0031  | 0.0443               |
| Gm13131       | ENSMUSG000000081772.1 | 107.2            | 44.2                            | -2.4                                         | 0.0001  | 0.0016               |
| Foxq1         | ENSMUSG000000038415.8 | 12.0             | 4.9                             | -2.4                                         | 0.0001  | 0.0016               |
| Apoa5         | ENSMUSG000000032079.5 | 571.3            | 234.1                           | -2.4                                         | 0.0013  | 0.0224               |
| Gm4952        | ENSMUSG000000071633.4 | 41.9             | 17.1                            | -2.5                                         | 0.0001  | 0.0016               |
| Ppm1k         | ENSMUSG000000037826.3 | 13.8             | 5.6                             | -2.5                                         | 0.0001  | 0.0016               |
| Plip          | ENSMUSG000000031775.4 | 4.1              | 1.7                             | -2.5                                         | 0.0001  | 0.0029               |
| Arid5b        | ENSMUSG000000019947.8 | 12.1             | 4.9                             | -2.5                                         | 0.0001  | 0.0016               |
| Cyp7b1        | ENSMUSG000000039519.6 | 254.1            | 102.3                           | -2.5                                         | 0.0001  | 0.0016               |
| Mug2          | ENSMUSG000000030131.7 | 126.9            | 50.7                            | -2.5                                         | 0.0001  | 0.0016               |
| 4930528F23Rik | ENSMUSG000000024155.7 | 23.4             | 9.3                             | -2.5                                         | 0.0001  | 0.0016               |
| Gm6684        | ENSMUSG000000047168.5 | 11.1             | 4.4                             | -2.5                                         | 0.0003  | 0.0072               |
| Agmat         | ENSMUSG000000040706.4 | 111.5            | 44.2                            | -2.5                                         | 0.0001  | 0.0016               |
| Gm14719       | ENSMUSG000000082192.1 | 34.0             | 13.4                            | -2.5                                         | 0.0020  | 0.0319               |
| Zap70         | ENSMUSG000000026117.7 | 4.2              | 1.7                             | -2.5                                         | 0.0009  | 0.0174               |
| Sox12         | ENSMUSG000000051817.7 | 1.1              | 0.4                             | -2.5                                         | 0.0004  | 0.0091               |
| Slc25a47      | ENSMUSG000000048856.8 | 223.2            | 87.9                            | -2.5                                         | 0.0001  | 0.0016               |
| Abcc6         | ENSMUSG000000030834.5 | 10.0             | 3.9                             | -2.5                                         | 0.0001  | 0.0016               |
| Ccrn4l        | ENSMUSG000000023087.9 | 8.3              | 3.3                             | -2.5                                         | 0.0001  | 0.0016               |
| Kdm5d         | ENSMUSG000000056673.7 | 2.7              | 1.1                             | -2.6                                         | 0.0006  | 0.0118               |
| Cd163         | ENSMUSG000000008845.3 | 2.4              | 0.9                             | -2.6                                         | 0.0018  | 0.0288               |
| Sucnr1        | ENSMUSG000000027762.5 | 24.5             | 9.5                             | -2.6                                         | 0.0001  | 0.0016               |
| Dcxr          | ENSMUSG000000039450.5 | 50.3             | 19.5                            | -2.6                                         | 0.0001  | 0.0016               |
| Nat1          | ENSMUSG000000025588.3 | 2.6              | 1.0                             | -2.6                                         | 0.0003  | 0.0072               |
| Gm5239        | ENSMUSG000000062742.3 | 58.2             | 22.3                            | -2.6                                         | 0.0001  | 0.0016               |
| Pdilt         | ENSMUSG000000030968.2 | 3.7              | 1.4                             | -2.6                                         | 0.0005  | 0.0100               |
| Rpl36-ps3     | ENSMUSG000000066629.1 | 35.5             | 13.4                            | -2.6                                         | 0.0001  | 0.0016               |
| Cyp2d9        | ENSMUSG000000068086.5 | 677.0            | 255.7                           | -2.6                                         | 0.0001  | 0.0016               |

**Supplemental Table 5: Significantly altered transcripts in E2F7/8 deleted liver tumors vs. wildtype liver identified by RNA sequencing.**

| Gene Symbol   | Ensembl ID            | WT mean<br>(n=4) | 78DKO<br>tumor<br>mean<br>(n=4) | Fold<br>change<br>(WT vs.<br>78DKO<br>tumor) | P-value | adjusted P-<br>value |
|---------------|-----------------------|------------------|---------------------------------|----------------------------------------------|---------|----------------------|
| Mup20         | ENSMUSG00000078672.2  | 862.4            | 325.6                           | <b>-2.6</b>                                  | 0.0010  | 0.0182               |
| Adh4          | ENSMUSG00000037797.8  | 336.2            | 126.7                           | <b>-2.7</b>                                  | 0.0011  | 0.0196               |
| Necab1        | ENSMUSG00000040536.9  | 16.0             | 6.0                             | <b>-2.7</b>                                  | 0.0002  | 0.0041               |
| Khdrbs3       | ENSMUSG00000022332.7  | 9.4              | 3.5                             | <b>-2.7</b>                                  | 0.0006  | 0.0125               |
| Gm14630       | ENSMUSG00000081100.1  | 51.7             | 19.4                            | <b>-2.7</b>                                  | 0.0003  | 0.0062               |
| Ubd           | ENSMUSG00000035186.6  | 22.6             | 8.5                             | <b>-2.7</b>                                  | 0.0001  | 0.0016               |
| Amdhd1        | ENSMUSG00000015890.2  | 67.2             | 24.5                            | <b>-2.7</b>                                  | 0.0001  | 0.0016               |
| Adra1a        | ENSMUSG00000045875.5  | 1.4              | 0.5                             | <b>-2.7</b>                                  | 0.0016  | 0.0269               |
| Cyp2c50       | ENSMUSG00000054827.6  | 357.9            | 129.8                           | <b>-2.8</b>                                  | 0.0001  | 0.0016               |
| Colec10       | ENSMUSG00000038591.3  | 7.6              | 2.8                             | <b>-2.8</b>                                  | 0.0001  | 0.0016               |
| AY036118      | ENSMUSG00000045999.8  | 30.0             | 10.9                            | <b>-2.8</b>                                  | 0.0001  | 0.0016               |
| Fabp7         | ENSMUSG00000019874.5  | 6.3              | 2.3                             | <b>-2.8</b>                                  | 0.0005  | 0.0110               |
| Fbln2         | ENSMUSG00000064080.6  | 3.4              | 1.2                             | <b>-2.8</b>                                  | 0.0010  | 0.0182               |
| Gm8290        | ENSMUSG00000074854.3  | 4.6              | 1.6                             | <b>-2.8</b>                                  | 0.0032  | 0.0454               |
| Agxt          | ENSMUSG00000026272.5  | 171.2            | 60.8                            | <b>-2.8</b>                                  | 0.0001  | 0.0016               |
| Pck1          | ENSMUSG00000027513.5  | 568.5            | 201.4                           | <b>-2.8</b>                                  | 0.0004  | 0.0091               |
| Fam131c       | ENSMUSG00000006218.4  | 2.1              | 0.7                             | <b>-2.8</b>                                  | 0.0007  | 0.0133               |
| Saa1          | ENSMUSG00000074115.3  | 182.1            | 64.0                            | <b>-2.8</b>                                  | 0.0001  | 0.0016               |
| Bdh2          | ENSMUSG00000028167.9  | 11.0             | 3.9                             | <b>-2.8</b>                                  | 0.0005  | 0.0100               |
| Gm7079        | ENSMUSG00000068243.6  | 164.3            | 57.6                            | <b>-2.9</b>                                  | 0.0002  | 0.0041               |
| Igfbp2        | ENSMUSG00000039323.11 | 225.1            | 78.8                            | <b>-2.9</b>                                  | 0.0001  | 0.0016               |
| Gm6571        | ENSMUSG00000092253.1  | 2.2              | 0.8                             | <b>-2.9</b>                                  | 0.0006  | 0.0118               |
| Cyp2g1        | ENSMUSG00000049685.7  | 2.8              | 1.0                             | <b>-2.9</b>                                  | 0.0001  | 0.0029               |
| 1110001J03Rik | ENSMUSG00000019689.4  | 36.0             | 12.4                            | <b>-2.9</b>                                  | 0.0001  | 0.0016               |
| Fn3k          | ENSMUSG00000025175.6  | 14.7             | 5.1                             | <b>-2.9</b>                                  | 0.0001  | 0.0016               |
| Nox4          | ENSMUSG00000030562.9  | 20.2             | 6.9                             | <b>-2.9</b>                                  | 0.0001  | 0.0016               |
| Lrit1         | ENSMUSG00000041044.8  | 2.5              | 0.9                             | <b>-2.9</b>                                  | 0.0001  | 0.0016               |
| Ugt3a1        | ENSMUSG00000072664.3  | 88.1             | 29.4                            | <b>-3.0</b>                                  | 0.0001  | 0.0016               |
| Syt3          | ENSMUSG00000030731.7  | 2.4              | 0.8                             | <b>-3.0</b>                                  | 0.0003  | 0.0062               |
| Retsat        | ENSMUSG00000056666.6  | 212.5            | 69.5                            | <b>-3.1</b>                                  | 0.0021  | 0.0324               |
| 9130409I23Rik | ENSMUSG00000038768.7  | 8.5              | 2.8                             | <b>-3.1</b>                                  | 0.0001  | 0.0016               |
| Marco         | ENSMUSG00000026390.1  | 3.4              | 1.1                             | <b>-3.1</b>                                  | 0.0024  | 0.0366               |
| Folr2         | ENSMUSG00000032725.8  | 10.5             | 3.4                             | <b>-3.1</b>                                  | 0.0002  | 0.0041               |
| Spsb4         | ENSMUSG00000046997.5  | 6.5              | 2.1                             | <b>-3.1</b>                                  | 0.0011  | 0.0196               |
| Gnmt          | ENSMUSG00000002769.8  | 973.3            | 312.3                           | <b>-3.1</b>                                  | 0.0036  | 0.0493               |
| Sntg2         | ENSMUSG00000020672.7  | 7.0              | 2.2                             | <b>-3.2</b>                                  | 0.0001  | 0.0029               |
| Chpt1         | ENSMUSG00000060002.8  | 131.3            | 41.4                            | <b>-3.2</b>                                  | 0.0001  | 0.0016               |

**Supplemental Table 5: Significantly altered transcripts in E2F7/8 deleted liver tumors vs. wildtype liver identified by RNA sequencing.**

| Gene Symbol   | Ensembl ID            | WT mean<br>(n=4) | 78DKO<br>tumor<br>mean<br>(n=4) | Fold<br>change<br>(WT vs.<br>78DKO<br>tumor) | P-value | adjusted P-<br>value |
|---------------|-----------------------|------------------|---------------------------------|----------------------------------------------|---------|----------------------|
| Tlr5          | ENSMUSG00000079164.2  | 2.2              | 0.7                             | <b>-3.2</b>                                  | 0.0011  | 0.0203               |
| Gm8215        | ENSMUSG00000081409.1  | 2.2              | 0.7                             | <b>-3.2</b>                                  | 0.0004  | 0.0091               |
| Gsn           | ENSMUSG00000026879.7  | 12.1             | 3.7                             | <b>-3.2</b>                                  | 0.0001  | 0.0016               |
| Dpm3          | ENSMUSG00000042737.3  | 22.9             | 7.1                             | <b>-3.2</b>                                  | 0.0001  | 0.0016               |
| Gpcpd1        | ENSMUSG00000027346.9  | 55.5             | 17.2                            | <b>-3.2</b>                                  | 0.0001  | 0.0016               |
| Gm11410       | ENSMUSG00000083219.1  | 1.2              | 0.4                             | <b>-3.3</b>                                  | 0.0014  | 0.0237               |
| Cadm4         | ENSMUSG00000054793.7  | 6.3              | 1.9                             | <b>-3.3</b>                                  | 0.0001  | 0.0016               |
| 2310001H17Rik | ENSMUSG00000085930.1  | 34.6             | 10.5                            | <b>-3.3</b>                                  | 0.0001  | 0.0016               |
| Cd207         | ENSMUSG00000034783.6  | 8.9              | 2.7                             | <b>-3.3</b>                                  | 0.0001  | 0.0016               |
| Serpina3b     | ENSMUSG00000066364.2  | 14.7             | 4.4                             | <b>-3.3</b>                                  | 0.0001  | 0.0016               |
| Phlda1        | ENSMUSG00000020205.6  | 53.0             | 15.9                            | <b>-3.3</b>                                  | 0.0001  | 0.0016               |
| Mmp2          | ENSMUSG00000031740.7  | 1.8              | 0.5                             | <b>-3.4</b>                                  | 0.0001  | 0.0016               |
| Cyp4a12b      | ENSMUSG00000078597.2  | 117.3            | 34.5                            | <b>-3.4</b>                                  | 0.0001  | 0.0016               |
| AI324046      | ENSMUSG00000076615.2  | 1.5              | 0.5                             | <b>-3.4</b>                                  | 0.0010  | 0.0189               |
| Cpsf4l        | ENSMUSG00000018727.12 | 8.6              | 2.5                             | <b>-3.4</b>                                  | 0.0031  | 0.0443               |
| Cyp4a14       | ENSMUSG00000028715.2  | 14.0             | 4.1                             | <b>-3.4</b>                                  | 0.0006  | 0.0118               |
| Dio1          | ENSMUSG00000034785.8  | 60.7             | 17.6                            | <b>-3.5</b>                                  | 0.0001  | 0.0016               |
| Upp2          | ENSMUSG00000026839.10 | 364.2            | 105.1                           | <b>-3.5</b>                                  | 0.0001  | 0.0016               |
| Gm17041       | ENSMUSG00000090570.1  | 25.7             | 7.4                             | <b>-3.5</b>                                  | 0.0002  | 0.0051               |
| Ndufa3        | ENSMUSG00000035674.7  | 115.1            | 33.1                            | <b>-3.5</b>                                  | 0.0001  | 0.0016               |
| Mafb          | ENSMUSG00000074622.3  | 9.7              | 2.8                             | <b>-3.5</b>                                  | 0.0001  | 0.0016               |
| Cyp4a12a      | ENSMUSG00000066071.5  | 301.7            | 86.3                            | <b>-3.5</b>                                  | 0.0003  | 0.0062               |
| Cyp8b1        | ENSMUSG00000050445.4  | 162.4            | 45.5                            | <b>-3.6</b>                                  | 0.0002  | 0.0041               |
| Gpx1          | ENSMUSG00000063856.5  | 1139.6           | 316.8                           | <b>-3.6</b>                                  | 0.0001  | 0.0016               |
| Car1          | ENSMUSG00000027556.8  | 9.1              | 2.5                             | <b>-3.6</b>                                  | 0.0001  | 0.0016               |
| 2610507I01Rik | ENSMUSG00000085882.1  | 0.7              | 0.2                             | <b>-3.6</b>                                  | 0.0012  | 0.0216               |
| AI606181      | ENSMUSG00000074873.3  | 0.7              | 0.2                             | <b>-3.8</b>                                  | 0.0001  | 0.0016               |
| Slc22a7       | ENSMUSG00000067144.5  | 36.8             | 9.8                             | <b>-3.8</b>                                  | 0.0001  | 0.0016               |
| Cyp2c29       | ENSMUSG00000003053.9  | 890.4            | 232.7                           | <b>-3.8</b>                                  | 0.0002  | 0.0041               |
| Bmf           | ENSMUSG00000040093.9  | 6.3              | 1.6                             | <b>-3.8</b>                                  | 0.0004  | 0.0091               |
| Gna14         | ENSMUSG00000024697.3  | 2.9              | 0.7                             | <b>-3.8</b>                                  | 0.0007  | 0.0133               |
| Slc2a5        | ENSMUSG00000028976.4  | 11.5             | 3.0                             | <b>-3.9</b>                                  | 0.0002  | 0.0051               |
| Mup-ps21      | ENSMUSG00000083524.1  | 541.1            | 139.1                           | <b>-3.9</b>                                  | 0.0001  | 0.0016               |
| Dpy19l3       | ENSMUSG00000043671.8  | 34.7             | 8.8                             | <b>-3.9</b>                                  | 0.0018  | 0.0293               |
| Gm5617        | ENSMUSG00000042293.7  | 6.1              | 1.5                             | <b>-3.9</b>                                  | 0.0001  | 0.0016               |
| Mcm10         | ENSMUSG00000026669.8  | 87.5             | 22.1                            | <b>-4.0</b>                                  | 0.0001  | 0.0016               |
| Igkv12-41     | ENSMUSG00000076568.1  | 8.6              | 2.1                             | <b>-4.0</b>                                  | 0.0010  | 0.0182               |

**Supplemental Table 5: Significantly altered transcripts in E2F7/8 deleted liver tumors vs. wildtype liver identified by RNA sequencing.**

| Gene Symbol   | Ensembl ID            | WT mean<br>(n=4) | 78DKO<br>tumor<br>mean<br>(n=4) | Fold<br>change<br>(WT vs.<br>78DKO<br>tumor) | P-value | adjusted P-<br>value |
|---------------|-----------------------|------------------|---------------------------------|----------------------------------------------|---------|----------------------|
| Gm7808        | ENSMUSG00000091460.1  | 227.6            | 56.5                            | <b>-4.0</b>                                  | 0.0001  | 0.0016               |
| Cxcl13        | ENSMUSG00000023078.4  | 2.5              | 0.6                             | <b>-4.0</b>                                  | 0.0002  | 0.0041               |
| Gm13203       | ENSMUSG00000087273.1  | 2.7              | 0.7                             | <b>-4.0</b>                                  | 0.0036  | 0.0499               |
| Nudt7         | ENSMUSG00000031767.7  | 496.3            | 122.9                           | <b>-4.0</b>                                  | 0.0001  | 0.0016               |
| Hspa1b        | ENSMUSG00000090877.2  | 2.8              | 0.7                             | <b>-4.1</b>                                  | 0.0001  | 0.0016               |
| Cyp2c54       | ENSMUSG00000067225.1  | 271.7            | 66.2                            | <b>-4.1</b>                                  | 0.0001  | 0.0016               |
| 4930480G23Rik | ENSMUSG00000086332.1  | 2.3              | 0.6                             | <b>-4.1</b>                                  | 0.0018  | 0.0293               |
| Hamp          | ENSMUSG00000050440.7  | 6344.3           | 1492.1                          | <b>-4.3</b>                                  | 0.0001  | 0.0016               |
| Ppargc1b      | ENSMUSG00000033871.8  | 3.8              | 0.9                             | <b>-4.3</b>                                  | 0.0001  | 0.0016               |
| Ankrd55       | ENSMUSG00000049985.7  | 17.9             | 4.1                             | <b>-4.3</b>                                  | 0.0001  | 0.0029               |
| Scnn1a        | ENSMUSG00000030340.8  | 4.1              | 0.9                             | <b>-4.3</b>                                  | 0.0001  | 0.0016               |
| Hamp2         | ENSMUSG00000056978.6  | 646.0            | 148.7                           | <b>-4.3</b>                                  | 0.0001  | 0.0016               |
| Igkv1-135     | ENSMUSG00000076502.1  | 13.0             | 3.0                             | <b>-4.4</b>                                  | 0.0001  | 0.0016               |
| Dbp           | ENSMUSG00000059824.4  | 102.1            | 23.3                            | <b>-4.4</b>                                  | 0.0025  | 0.0378               |
| Klf1          | ENSMUSG00000054191.7  | 2.7              | 0.6                             | <b>-4.4</b>                                  | 0.0001  | 0.0016               |
| Mup-ps22      | ENSMUSG00000080738.1  | 267.5            | 60.0                            | <b>-4.5</b>                                  | 0.0001  | 0.0016               |
| Gm13152       | ENSMUSG00000078496.3  | 3.3              | 0.7                             | <b>-4.5</b>                                  | 0.0001  | 0.0016               |
| 1810019J16Rik | ENSMUSG00000037600.10 | 0.7              | 0.2                             | <b>-4.5</b>                                  | 0.0015  | 0.0250               |
| Mup-ps3       | ENSMUSG00000084242.1  | 8.9              | 1.9                             | <b>-4.6</b>                                  | 0.0009  | 0.0165               |
| Zfp458        | ENSMUSG00000055480.6  | 1.9              | 0.4                             | <b>-4.6</b>                                  | 0.0001  | 0.0016               |
| Gm129         | ENSMUSG00000038550.4  | 14.3             | 3.1                             | <b>-4.7</b>                                  | 0.0002  | 0.0051               |
| Nr1d1         | ENSMUSG00000020889.10 | 42.0             | 8.8                             | <b>-4.7</b>                                  | 0.0006  | 0.0118               |
| Gas1          | ENSMUSG00000052957.6  | 4.3              | 0.9                             | <b>-4.8</b>                                  | 0.0001  | 0.0016               |
| Ces1e         | ENSMUSG00000061959.6  | 142.7            | 28.8                            | <b>-5.0</b>                                  | 0.0001  | 0.0016               |
| Syde2         | ENSMUSG00000036863.6  | 1.5              | 0.3                             | <b>-5.1</b>                                  | 0.0001  | 0.0016               |
| Mup-ps19      | ENSMUSG00000082644.1  | 1301.9           | 251.0                           | <b>-5.2</b>                                  | 0.0001  | 0.0016               |
| 1700095J07Rik | ENSMUSG00000084861.1  | 0.7              | 0.1                             | <b>-5.2</b>                                  | 0.0001  | 0.0016               |
| Gm13775       | ENSMUSG00000081207.3  | 21.6             | 4.0                             | <b>-5.4</b>                                  | 0.0001  | 0.0016               |
| Mmd2          | ENSMUSG00000039533.7  | 1.8              | 0.3                             | <b>-5.6</b>                                  | 0.0001  | 0.0016               |
| Gm13773       | ENSMUSG00000086253.1  | 19.7             | 3.4                             | <b>-5.9</b>                                  | 0.0001  | 0.0016               |
| 1100001G20Rik | ENSMUSG00000051748.2  | 1194.9           | 200.0                           | <b>-6.0</b>                                  | 0.0001  | 0.0016               |
| Lect1         | ENSMUSG00000022025.7  | 13.0             | 2.1                             | <b>-6.1</b>                                  | 0.0001  | 0.0016               |
| Tex12         | ENSMUSG00000032065.5  | 3.4              | 0.5                             | <b>-6.2</b>                                  | 0.0009  | 0.0165               |
| Cyp2u1        | ENSMUSG00000027983.8  | 33.7             | 5.3                             | <b>-6.4</b>                                  | 0.0001  | 0.0016               |
| 1810046K07Rik | ENSMUSG00000036027.4  | 4.6              | 0.7                             | <b>-6.4</b>                                  | 0.0001  | 0.0029               |
| Mup-ps10      | ENSMUSG00000082173.1  | 22.3             | 3.3                             | <b>-6.8</b>                                  | 0.0001  | 0.0016               |
| 2810007J24Rik | ENSMUSG00000030378.7  | 634.7            | 93.3                            | <b>-6.8</b>                                  | 0.0001  | 0.0016               |



**Supplemental Table 5: Significantly altered transcripts in E2F7/8 deleted liver tumors vs. wildtype liver identified by RNA sequencing.**

| Gene Symbol   | Ensembl ID           | WT mean<br>(n=4) | 78DKO<br>tumor<br>mean<br>(n=4) | Fold<br>change<br>(WT vs.<br>78DKO<br>tumor) | P-value | adjusted P-<br>value |
|---------------|----------------------|------------------|---------------------------------|----------------------------------------------|---------|----------------------|
| Saa3          | ENSMUSG00000040026.7 | 88.6             | 13.0                            | <b>-6.8</b>                                  | 0.0001  | 0.0016               |
| Mitf          | ENSMUSG00000035158.8 | 5.6              | 0.8                             | <b>-6.9</b>                                  | 0.0004  | 0.0091               |
| Mup-ps14      | ENSMUSG00000082065.1 | 22.7             | 3.3                             | <b>-6.9</b>                                  | 0.0001  | 0.0016               |
| A2m           | ENSMUSG00000030111.8 | 1.2              | 0.2                             | <b>-6.9</b>                                  | 0.0011  | 0.0203               |
| Mup4          | ENSMUSG00000041333.6 | 193.3            | 27.2                            | <b>-7.1</b>                                  | 0.0001  | 0.0016               |
| Gm16002       | ENSMUSG00000073835.5 | 22.4             | 3.1                             | <b>-7.1</b>                                  | 0.0001  | 0.0016               |
| Igkv16-104    | ENSMUSG00000076522.1 | 11.4             | 1.6                             | <b>-7.2</b>                                  | 0.0002  | 0.0041               |
| AI428936      | ENSMUSG00000019737.7 | 2.0              | 0.3                             | <b>-7.3</b>                                  | 0.0001  | 0.0016               |
| 2210415F13Rik | ENSMUSG00000013643.7 | 1.6              | 0.2                             | <b>-7.3</b>                                  | 0.0002  | 0.0051               |
| Xlr3a         | ENSMUSG00000057836.6 | 3.4              | 0.5                             | <b>-7.3</b>                                  | 0.0001  | 0.0029               |
| Gm14432       | ENSMUSG00000078885.3 | 3.2              | 0.4                             | <b>-7.4</b>                                  | 0.0031  | 0.0439               |
| Hsd3b5        | ENSMUSG00000038092.5 | 68.3             | 9.1                             | <b>-7.5</b>                                  | 0.0001  | 0.0016               |
| Mup-ps13      | ENSMUSG00000082425.1 | 203.6            | 27.0                            | <b>-7.5</b>                                  | 0.0001  | 0.0016               |
| Mup21         | ENSMUSG00000066153.2 | 1984.0           | 263.3                           | <b>-7.5</b>                                  | 0.0001  | 0.0016               |
| Pcsk4         | ENSMUSG00000020131.8 | 5.9              | 0.8                             | <b>-7.6</b>                                  | 0.0001  | 0.0016               |
| AC111115.1    | ENSMUSG00000080412.1 | 460.9            | 60.0                            | <b>-7.7</b>                                  | 0.0001  | 0.0016               |
| Capn8         | ENSMUSG00000038599.8 | 3.9              | 0.5                             | <b>-7.8</b>                                  | 0.0001  | 0.0016               |
| Igf2          | ENSMUSG00000048583.9 | 17.2             | 2.2                             | <b>-7.8</b>                                  | 0.0001  | 0.0029               |
| Aqp4          | ENSMUSG00000024411.8 | 2.0              | 0.2                             | <b>-7.9</b>                                  | 0.0001  | 0.0016               |
| Mfsd2a        | ENSMUSG00000028655.5 | 25.2             | 3.2                             | <b>-8.0</b>                                  | 0.0001  | 0.0016               |
| Susd4         | ENSMUSG00000038576.8 | 21.5             | 2.7                             | <b>-8.1</b>                                  | 0.0001  | 0.0016               |
| Mup-ps4       | ENSMUSG00000078685.4 | 8.7              | 1.0                             | <b>-8.3</b>                                  | 0.0001  | 0.0016               |
| Clec2h        | ENSMUSG00000030364.3 | 1.5              | 0.2                             | <b>-8.4</b>                                  | 0.0001  | 0.0016               |
| Rd3           | ENSMUSG00000049353.8 | 1.6              | 0.2                             | <b>-8.7</b>                                  | 0.0003  | 0.0062               |
| Elovl3        | ENSMUSG00000038754.3 | 20.9             | 2.3                             | <b>-8.9</b>                                  | 0.0001  | 0.0016               |
| Igkv12-44     | ENSMUSG00000076566.1 | 17.4             | 1.9                             | <b>-9.0</b>                                  | 0.0001  | 0.0016               |
| Mup-ps7       | ENSMUSG00000078679.4 | 6.5              | 0.7                             | <b>-9.2</b>                                  | 0.0001  | 0.0029               |
| Mup10         | ENSMUSG00000078680.3 | 6536.7           | 663.2                           | <b>-9.9</b>                                  | 0.0004  | 0.0091               |
| Slc15a5       | ENSMUSG00000044378.5 | 5.8              | 0.6                             | <b>-10.1</b>                                 | 0.0001  | 0.0016               |
| Xlr3b         | ENSMUSG00000073125.4 | 1.3              | 0.1                             | <b>-10.2</b>                                 | 0.0002  | 0.0051               |
| Mup-ps20      | ENSMUSG00000084309.1 | 22.6             | 2.2                             | <b>-10.2</b>                                 | 0.0001  | 0.0016               |
| Xlr3c         | ENSMUSG00000058147.1 | 1.0              | 0.1                             | <b>-10.6</b>                                 | 0.0008  | 0.0149               |
| Mup19         | ENSMUSG00000078673.3 | 6046.3           | 566.9                           | <b>-10.7</b>                                 | 0.0001  | 0.0016               |
| Mup-ps16      | ENSMUSG00000090090.1 | 15.2             | 1.4                             | <b>-10.7</b>                                 | 0.0018  | 0.0293               |
| Mup11         | ENSMUSG00000073834.4 | 6613.9           | 615.6                           | <b>-10.7</b>                                 | 0.0001  | 0.0016               |
| Mup18         | ENSMUSG00000078674.2 | 5436.5           | 504.9                           | <b>-10.8</b>                                 | 0.0008  | 0.0149               |
| Mup17         | ENSMUSG00000089681.2 | 5550.9           | 506.8                           | <b>-11.0</b>                                 | 0.0001  | 0.0016               |

**Supplemental Table 5: Significantly altered transcripts in E2F7/8 deleted liver tumors vs. wildtype liver identified by RNA sequencing.**

| Gene Symbol   | Ensembl ID            | WT mean<br>(n=4) | 78DKO<br>tumor<br>mean<br>(n=4) | Fold<br>change<br>(WT vs.<br>78DKO<br>tumor) | P-value | adjusted P-<br>value |
|---------------|-----------------------|------------------|---------------------------------|----------------------------------------------|---------|----------------------|
| Mup16         | ENSMUSG00000078675.3  | 4673.9           | 425.1                           | <b>-11.0</b>                                 | 0.0001  | 0.0029               |
| Mup-ps18      | ENSMUSG00000082363.1  | 2743.2           | 248.1                           | <b>-11.1</b>                                 | 0.0001  | 0.0016               |
| Mup12         | ENSMUSG00000073839.6  | 6968.1           | 625.1                           | <b>-11.1</b>                                 | 0.0001  | 0.0016               |
| Mup7          | ENSMUSG00000073842.4  | 6025.8           | 537.0                           | <b>-11.2</b>                                 | 0.0029  | 0.0417               |
| Mup2          | ENSMUSG00000078688.4  | 6757.2           | 599.4                           | <b>-11.3</b>                                 | 0.0005  | 0.0100               |
| Mup1          | ENSMUSG00000078683.2  | 6514.3           | 577.1                           | <b>-11.3</b>                                 | 0.0002  | 0.0041               |
| Mup8          | ENSMUSG00000078687.3  | 5370.8           | 474.2                           | <b>-11.3</b>                                 | 0.0001  | 0.0016               |
| Mup13         | ENSMUSG00000089873.2  | 5255.3           | 463.4                           | <b>-11.3</b>                                 | 0.0008  | 0.0149               |
| Mup-ps9       | ENSMUSG00000081521.1  | 17.1             | 1.5                             | <b>-11.5</b>                                 | 0.0001  | 0.0016               |
| Mup-ps2       | ENSMUSG00000073840.4  | 20.0             | 1.7                             | <b>-11.5</b>                                 | 0.0001  | 0.0016               |
| Dct           | ENSMUSG00000022129.2  | 1.6              | 0.1                             | <b>-11.6</b>                                 | 0.0001  | 0.0016               |
| Nnmt          | ENSMUSG00000032271.7  | 50.4             | 4.3                             | <b>-11.8</b>                                 | 0.0001  | 0.0016               |
| Mup-ps6       | ENSMUSG00000082813.1  | 72.9             | 6.1                             | <b>-12.0</b>                                 | 0.0001  | 0.0016               |
| Mup6          | ENSMUSG00000078689.2  | 392.7            | 31.7                            | <b>-12.4</b>                                 | 0.0001  | 0.0016               |
| Mup5          | ENSMUSG00000058523.2  | 570.1            | 45.7                            | <b>-12.5</b>                                 | 0.0001  | 0.0016               |
| Igkv1-133     | ENSMUSG00000076503.1  | 28.7             | 2.3                             | <b>-12.7</b>                                 | 0.0001  | 0.0016               |
| Mup-ps15      | ENSMUSG00000083304.1  | 12.1             | 0.9                             | <b>-13.5</b>                                 | 0.0001  | 0.0016               |
| Mup-ps5       | ENSMUSG00000082868.1  | 1166.1           | 83.8                            | <b>-13.9</b>                                 | 0.0001  | 0.0029               |
| 1500017E21Rik | ENSMUSG00000087579.1  | 34.8             | 2.1                             | <b>-16.3</b>                                 | 0.0001  | 0.0016               |
| Mup-ps8       | ENSMUSG00000078678.4  | 37.7             | 2.1                             | <b>-18.1</b>                                 | 0.0001  | 0.0016               |
| Mup-ps17      | ENSMUSG00000081053.1  | 16335.3          | 895.7                           | <b>-18.2</b>                                 | 0.0001  | 0.0016               |
| C330002G04Rik | ENSMUSG00000087169.2  | 12.6             | 0.6                             | <b>-19.9</b>                                 | 0.0001  | 0.0016               |
| Thbs4         | ENSMUSG00000021702.7  | 0.9              | 0.0                             | <b>-26.3</b>                                 | 0.0008  | 0.0149               |
| Gm2788        | ENSMUSG00000085995.1  | 27.0             | 0.8                             | <b>-32.1</b>                                 | 0.0017  | 0.0282               |
| Fgf13         | ENSMUSG00000031137.11 | 2.5              | 0.1                             | <b>-33.5</b>                                 | 0.0001  | 0.0016               |
| Ccdc38        | ENSMUSG00000036168.8  | 1.2              | 0.0                             | <b>-58.4</b>                                 | 0.0003  | 0.0072               |
| Crabp1        | ENSMUSG00000032291.8  | 2.4              | 0.0                             | <b>-114.8</b>                                | 0.0001  | 0.0016               |

**Supplemental Table 6: Putative direct E2F7/8 target genes (developmental)****Expression during development in**

| <b>Gene ID</b> | <b>78dko livers (4 wks)</b> | <b>regulated by</b> |
|----------------|-----------------------------|---------------------|
| ATAD2          | upregulated                 | E2F7/8              |
| BRCA2          | upregulated                 | E2F7/8              |
| BRIP1          | upregulated                 | E2F7/8              |
| CDC6           | upregulated                 | E2F7/8              |
| CDCA3          | upregulated                 | E2F7/8              |
| CDT1           | upregulated                 | E2F7/8              |
| CENPH          | upregulated                 | E2F7/8              |
| CENPI          | upregulated                 | E2F7/8              |
| CHAF1A         | upregulated                 | E2F7/8              |
| CHEK1          | upregulated                 | E2F7/8              |
| CLSPN          | upregulated                 | E2F7/8              |
| DSN1           | upregulated                 | E2F7/8              |
| DTL            | upregulated                 | E2F7/8              |
| E2F1           | upregulated                 | E2F7/8              |
| E2F8           | upregulated                 | E2F7/8              |
| EXO1           | upregulated                 | E2F7/8              |
| EZH2           | upregulated                 | E2F7/8              |
| FANCD2         | upregulated                 | E2F7/8              |
| FBXL20         | upregulated                 | E2F7/8              |
| FBXO5          | upregulated                 | E2F7/8              |
| FDPS           | upregulated                 | E2F7/8              |
| GINS3          | upregulated                 | E2F7/8              |
| HELLS          | upregulated                 | E2F7/8              |
| HMGB2          | upregulated                 | E2F7/8              |
| KNTC1          | upregulated                 | E2F7/8              |
| LIG1           | upregulated                 | E2F7/8              |
| LMNB1          | upregulated                 | E2F7/8              |
| MCM2           | upregulated                 | E2F7/8              |
| MCM3           | upregulated                 | E2F7/8              |
| MCM5           | upregulated                 | E2F7/8              |
| MCM6           | upregulated                 | E2F7/8              |
| MLF1IP         | upregulated                 | E2F7/8              |
| NUSAP1         | upregulated                 | E2F7/8              |
| PCNA           | upregulated                 | E2F7/8              |
| POLE           | upregulated                 | E2F7/8              |
| RAD51AP1       | upregulated                 | E2F7/8              |
| RAD54L         | upregulated                 | E2F7/8              |
| RRM2           | upregulated                 | E2F7/8              |
| SPC25          | upregulated                 | E2F7/8              |
| STIL           | upregulated                 | E2F7/8              |

**Supplemental Table 6: Putative direct E2F7/8 target genes (developmental)****Expression during development in**

| <b>Gene ID</b> | <b>78dko livers (4 wks)</b> | <b>regulated by</b> |
|----------------|-----------------------------|---------------------|
| TCF19          | upregulated                 | E2F7/8              |
| TIMELESS       | upregulated                 | E2F7/8              |
| TOP2A          | upregulated                 | E2F7/8              |
| UBE2T          | upregulated                 | E2F7/8              |
| UHRF1          | upregulated                 | E2F7/8              |
| CYR61          | upregulated                 | E2F7                |
| E2F7           | upregulated                 | E2F7                |
| PKMYT1         | upregulated                 | E2F7                |
| AARS           | upregulated                 | E2F8                |
| AHCTF1         | upregulated                 | E2F8                |
| BCL6           | upregulated                 | E2F8                |
| BUB3           | upregulated                 | E2F8                |
| CCNA2          | upregulated                 | E2F8                |
| CCNT1          | upregulated                 | E2F8                |
| CDCA5          | upregulated                 | E2F8                |
| CENPK          | upregulated                 | E2F8                |
| CENPL          | upregulated                 | E2F8                |
| CHAC1          | upregulated                 | E2F8                |
| DIDO1          | upregulated                 | E2F8                |
| ESPL1          | upregulated                 | E2F8                |
| KIF11          | upregulated                 | E2F8                |
| KIF18A         | upregulated                 | E2F8                |
| MASTL          | upregulated                 | E2F8                |
| MCM7           | upregulated                 | E2F8                |
| MCM8           | upregulated                 | E2F8                |
| MELK           | upregulated                 | E2F8                |
| NCAPG2         | upregulated                 | E2F8                |
| NPL            | upregulated                 | E2F8                |
| NSL1           | upregulated                 | E2F8                |
| PAK1IP1        | upregulated                 | E2F8                |
| PAWR           | upregulated                 | E2F8                |
| PHGDH          | upregulated                 | E2F8                |
| POLD1          | upregulated                 | E2F8                |
| PRIM1          | upregulated                 | E2F8                |
| PSRC1          | upregulated                 | E2F8                |
| RAD18          | upregulated                 | E2F8                |
| RAD51          | upregulated                 | E2F8                |
| SFPQ           | upregulated                 | E2F8                |
| SGOL2          | upregulated                 | E2F8                |
| SHCBP1         | upregulated                 | E2F8                |

**Supplemental Table 6: Putative direct E2F7/8 target genes (developmental)****Expression during development in**

| <b>Gene ID</b> | <b>78dko livers (4 wks)</b> | <b>regulated by</b> |
|----------------|-----------------------------|---------------------|
| SMC2           | upregulated                 | E2F8                |
| SMC4           | upregulated                 | E2F8                |
| SPAG5          | upregulated                 | E2F8                |
| STMN1          | upregulated                 | E2F8                |
| SYCE2          | upregulated                 | E2F8                |
| TPX2           | upregulated                 | E2F8                |
| TRA2A          | upregulated                 | E2F8                |
| TRIP13         | upregulated                 | E2F8                |
| MYC            | downregulated               | E2F7/8              |
| PHF14          | downregulated               | E2F7/8              |
| UBC            | downregulated               | E2F7/8              |
| FST            | downregulated               | E2F8                |
| GNAT1          | downregulated               | E2F8                |
| PHLDA3         | downregulated               | E2F8                |
| TRIM24         | downregulated               | E2F8                |
| WNK1           | downregulated               | E2F8                |

**Supplemental Table 7: Putative direct E2F7/8 target genes (tumor)  
Expression in 7/8dko liver tumors**

| <b>Gene ID</b> | <b>(12 months)</b> | <b>regulated by</b> |
|----------------|--------------------|---------------------|
| ATAD2          | upregulated        | E2F7/8              |
| CDC6           | upregulated        | E2F7/8              |
| CDKN1A         | upregulated        | E2F7/8              |
| CDKN2C         | upregulated        | E2F7/8              |
| DPYSL2         | upregulated        | E2F7/8              |
| E2F1           | upregulated        | E2F7/8              |
| GGCT           | upregulated        | E2F7/8              |
| MCM5           | upregulated        | E2F7/8              |
| MCM6           | upregulated        | E2F7/8              |
| NUCB2          | upregulated        | E2F7/8              |
| PLSCR1         | upregulated        | E2F7/8              |
| RRM2           | upregulated        | E2F7/8              |
| SLC1A5         | upregulated        | E2F7/8              |
| SLC2A4         | upregulated        | E2F7/8              |
| SPC25          | upregulated        | E2F7/8              |
| TCF19          | upregulated        | E2F7/8              |
| TOP2A          | upregulated        | E2F7/8              |
| U1             | upregulated        | E2F7/8              |
| U2             | upregulated        | E2F7/8              |
| UHRF1          | upregulated        | E2F7/8              |
| ABHD2          | upregulated        | E2F7                |
| CYR61          | upregulated        | E2F7                |
| EGR1           | upregulated        | E2F7                |
| PKMYT1         | upregulated        | E2F7                |
| SEMA6B         | upregulated        | E2F7                |
| ABI2           | upregulated        | E2F8                |
| ANO10          | upregulated        | E2F8                |
| BTG3           | upregulated        | E2F8                |
| CCNA2          | upregulated        | E2F8                |
| CD2AP          | upregulated        | E2F8                |
| CDCA5          | upregulated        | E2F8                |
| CDK1           | upregulated        | E2F8                |
| CHMP2B         | upregulated        | E2F8                |
| CYP1B1         | upregulated        | E2F8                |
| CYP39A1        | upregulated        | E2F8                |
| DAPK2          | upregulated        | E2F8                |
| DLX4           | upregulated        | E2F8                |
| DSCC1          | upregulated        | E2F8                |
| DUSP6          | upregulated        | E2F8                |
| EFNA1          | upregulated        | E2F8                |

**Supplemental Table 7: Putative direct E2F7/8 target genes (tumor)****Expression in 7/8dko liver tumors**

| <b>Gene ID</b> | <b>(12 months)</b> | <b>regulated by</b> |
|----------------|--------------------|---------------------|
| FST            | upregulated        | E2F8                |
| HES1           | upregulated        | E2F8                |
| HMMR           | upregulated        | E2F8                |
| HSPBAP1        | upregulated        | E2F8                |
| IER5           | upregulated        | E2F8                |
| ITGAX          | upregulated        | E2F8                |
| KAZALD1        | upregulated        | E2F8                |
| LRFN3          | upregulated        | E2F8                |
| MTMR11         | upregulated        | E2F8                |
| NCAPG2         | upregulated        | E2F8                |
| NES            | upregulated        | E2F8                |
| PAWR           | upregulated        | E2F8                |
| PHGDH          | upregulated        | E2F8                |
| PSRC1          | upregulated        | E2F8                |
| PTER           | upregulated        | E2F8                |
| RAD51C         | upregulated        | E2F8                |
| SERPINE1       | upregulated        | E2F8                |
| SHANK2         | upregulated        | E2F8                |
| SMOX           | upregulated        | E2F8                |
| STMN1          | upregulated        | E2F8                |
| TAGLN2         | upregulated        | E2F8                |
| TFRC           | upregulated        | E2F8                |
| TM4SF1         | upregulated        | E2F8                |
| TPM4           | upregulated        | E2F8                |
| TRA2A          | upregulated        | E2F8                |
| TRIP13         | upregulated        | E2F8                |
| TUBA1B         | upregulated        | E2F8                |
| UNC119         | upregulated        | E2F8                |
| VANGL1         | upregulated        | E2F8                |
| DERA           | downregulated      | E2F7/8              |
| MCM10          | downregulated      | E2F7/8              |
| GCDH           | downregulated      | E2F7                |
| SLC25A42       | downregulated      | E2F7                |
| AQP11          | downregulated      | E2F8                |
| BMF            | downregulated      | E2F8                |
| CSRNP1         | downregulated      | E2F8                |
| GCHFR          | downregulated      | E2F8                |
| GLO1           | downregulated      | E2F8                |
| GNAT1          | downregulated      | E2F8                |

**Supplemental Table 7: Putative direct E2F7/8 target genes (tumor)**  
**Expression in 7/8dko liver tumors**

| <b>Gene ID</b> | <b>(12 months)</b> | <b>regulated by</b> |
|----------------|--------------------|---------------------|
| HAUS4          | downregulated      | E2F8                |
| HINT2          | downregulated      | E2F8                |
| ID3            | downregulated      | E2F8                |
| IDO2           | downregulated      | E2F8                |
| MMD            | downregulated      | E2F8                |
| PEX16          | downregulated      | E2F8                |
| PHF17          | downregulated      | E2F8                |
| POLG2          | downregulated      | E2F8                |
| SCARB2         | downregulated      | E2F8                |



**Supplemental Table 8: Contribution of E2F7/8 target genes to canonical pathways**

| <b>Ingenuity Canonical Pathways</b>                        | <b>E2F7/8 targets</b> | <b>-log(B-H p-value)</b> | <b>Ratio</b> | <b>Molecules</b>                    |
|------------------------------------------------------------|-----------------------|--------------------------|--------------|-------------------------------------|
| Cell Cycle Control of Chromosomal Replication              | developmental         | 8.98E00                  | 2.59E-01     | MCM5,MCM3,MCM6,MCM2,CDT1,CDC6,MCM7  |
|                                                            | tumor                 | 2.48E00                  | 1.11E-01     | MCM5,MCM6,CDC6                      |
| Role of BRCA1 in DNA Damage Response                       | developmental         | 4.5E00                   | 7.69E-02     | RAD51,FANCD2,E2F1,BRCA2,BRIP1,CHEK1 |
|                                                            | tumor                 | 8.39E-01                 | 2.56E-02     | E2F1,CDKN1A                         |
| BER pathway                                                | developmental         | 3.48E00                  | 2.5E-01      | LIG1,PCNA,POLE                      |
| DNA Double-Strand Break Repair by Homologous Recombination | developmental         | 3.39E00                  | 2.14E-01     | RAD51,LIG1,BRCA2                    |
| Mismatch Repair in Eukaryotes                              | developmental         | 3.3E00                   | 1.88E-01     | PCNA,POLD1,EXO1                     |
| Cell Cycle: G2/M DNA Damage Checkpoint Regulation          | developmental         | 2.13E00                  | 6.12E-02     | TOP2A,PKMYT1,CHEK1                  |
|                                                            | tumor                 | 3.01E00                  | 8.16E-02     | CDKN1A, TOP2A, PKMYT1, CDK1         |
| Cell Cycle: G1/S Checkpoint Regulation                     | developmental         | 1.02E00                  | 3.12E-02     | PAK1IP1,E2F1                        |
|                                                            | tumor                 | 1.67E00                  | 4.69E-02     | E2F1,CDKN1A,CDKN2C                  |
| Cyclins and Cell Cycle Regulation                          | developmental         | 8.88E-01                 | 2.56E-02     | CCNA2,E2F1                          |
|                                                            | tumor                 | 3.37E00                  | 6.41E-02     | CCNA2,E2F1,CDKN1A,CDKN2C,CDK1       |

**Supplemental Table 9: Functional annotation of E2F7/8 target genes**

| IPA Category                               | E2F7/8 targets | B-H P-value | Molecules                                                                                                                                                                                                                                                                                                                                                                                                                                                                                                          |
|--------------------------------------------|----------------|-------------|--------------------------------------------------------------------------------------------------------------------------------------------------------------------------------------------------------------------------------------------------------------------------------------------------------------------------------------------------------------------------------------------------------------------------------------------------------------------------------------------------------------------|
| Cell Cycle                                 | developmental  | 1.12E-20    | LIG1,MCM8,SMC4,DSN1,SFPQ,MELK,KNTC1,BCL6,LMNB1,CHAF1A,STMN1,EZH2,STIL,ESPL1,RAD54L,HELLS,PAWR,MASTL,TPX2,CCNT1,PCNA,SMC2,E2F1,RAD18,AHCTF1,PKMYT1,CLSPN,CYR61,KIF11,BUB3,CDT1,HMGB2,SPAG5,CHEK1,RAD51,CCNA2,FANCD2,TOP2A,SGOL2,CDCA5,EXO1,E2F8,DTL,SYCE2,TRIP13,NUSAP1,UHRF1,POLE,CDC6,SPC25,POLD1,NCAPG2,MCM3,MCM2,CENPI,E2F7,BRCA2,FBXO5,RAD51AP1,KIF18A,CENPH,MCM7                                                                                                                                              |
|                                            | tumor          | 3.81E-05    | TUBA1B,BTG3,CDKN2C,HES1,STMN1,CCNA2,CD2AP,CHMP2B,TOP2A,CDCA5,RAD51C,PLSCR1,NES,TRIP13,UHRF1,EGR1,CDC6,SPC25,PAWR,CYP1B1,CDK1,NCAPG2,CDKN1A,E2F1,TFRC,PKMYT1,CYR61,TM4SF1                                                                                                                                                                                                                                                                                                                                           |
| DNA Replication, Recombination, and Repair | developmental  | 1.12E-20    | LIG1,MCM6,MCM8,SMC4,DSN1,SFPQ,MELK,KNTC1,BCL6,CHAF1A,STMN1,EZH2,BRIP1,ESPL1,RRM2,RAD54L,PAWR,HELLS,ATAD2,MASTL,TPX2,PCNA,SMC2,TIMELESS,E2F1,RAD18,CLSPN,CYR61,KIF11,BUB3,CDT1,HMGB2,SPAG5,CHEK1,RAD51,CCNA2,FANCD2,TOP2A,SGOL2,CDCA5,EXO1,DTL,SYCE2,TRIP13,NUSAP1,UHRF1,CDC6,SPC25,POLE,POLD1,UBE2T,NCAPG2,MCM3,CENPI,MCM2,BRCA2,FBXO5,RAD51AP1,KIF18A,CENPH,MCM7                                                                                                                                                  |
|                                            | tumor          | 6.44E-04    | TRIP13,FST,SPC25,CDC6,RRM2,PAWR,ATAD2,CYP1B1,NCAPG2,CDK1,STMN1,CCNA2,CHMP2B,SMOX,CDKN1A,DSCC1,E2F1,TOP2A,CDCA5,RAD51C                                                                                                                                                                                                                                                                                                                                                                                              |
| Cell Death and Survival                    | developmental  | 4.05E-09    | LIG1,MCM8,SFPQ,MELK,BCL6,LMNB1,STMN1,EZH2,BRIP1,STIL,ESPL1,DIDO1,RRM2,RAD54L,HELLS,PAWR,ATAD2,TPX2,CCNT1,PCNA,E2F1,AHCTF1,RAD18,PKMYT1,CLSPN,AARS,CYR61,KIF11,CDT1,HMGB2,CHEK1,SPAG5,RAD51,CCNA2,FANCD2,TOP2A,EXO1,E2F8,DTL,NUSAP1,UHRF1,SPC25,CDC6,NCAPG2,FDPS,CENPI,MCM2,E2F7,BRCA2,FBXO5,KIF18A,MCM7                                                                                                                                                                                                            |
|                                            | tumor          | 1.42E-06    | BTG3,DAPK2,HMMR,DUSP6,CDKN2C,DLX4,HES1,UNC119,STMN1,CCNA2,CD2AP,TOP2A,HSPBAP1,RAD51C,SERPINE1,PLSCR1,FST,UHRF1,EGR1,SPC25,CDC6,RRM2,PAWR,SLC2A4,ATAD2,CDK1,CYP1B1,NCAPG2,EFNA1,SMOX,CDKN1A,E2F1,PKMYT1,TFRC,CYR61,TAGLN2                                                                                                                                                                                                                                                                                           |
| Cancer                                     | developmental  | 5.57E-07    | LIG1,MCM6,MCM8,PAK1IP1,SMC4,SFPQ,DSN1,MELK,KNTC1,BCL6,LMNB1,CHAF1A,NPL,STMN1,EZH2,CDCA3,BRIP1,MCM5,STIL,ESPL1,CENPL,DIDO1,RRM2,FBXL20,RAD54L,HELLS,PAWR,GINS3,ATAD2,TPX2,MASTL,CCNT1,PCNA,SMC2,TIMELESS,E2F1,RAD18,AHCTF1,CLSPN,AARS,CYR61,KIF11,BUB3,CDT1,NSL1,HMGB2,CHEK1,SPAG5,RAD51,TRA2A,CCNA2,PRIM1,FANCD2,PHGDH,TOP2A,SGOL2,CDCA5,E2F8,EXO1,DTL,SYCE2,TRIP13,NUSAP1,PSRC1,UHRF1,SPC25,CDC6,POLE,CENPU,POLD1,UBE2T,NCAPG2,CENPK,FDPS,MCM3,CENPI,MCM2,E2F7,CHAC1,FBXO5,TCF19,BRCA2,KIF18A,RAD51AP1,CENPH,MCM7 |
| Cancer                                     | tumor          | 3.81E-05    | DPYSL2,TUBA1B,MCM6,HMMR,CDKN2C,SEMA6B,HES1,STMN1,CD2AP,CHMP2B,RAD51C,SERPINE1,TPM4,MCM5,ANO10,FST,MTMR11,RRM2,KAZALD1,PAWR,ATAD2,SLC2A4,SMOX,E2F1,TFRC,CYR61,TAGLN2,ABI2,CYP39A1,SLC1A5,DAPK2,BTG3,DUSP6,DLX4,UNC119,LRFN3,TRA2A,CCNA2,PHGDH,ABHD2,TOP2A,HSPBAP1,CDCA5,SHANK2,IER5,PLSCR1,NES,TRIP13,PSRC1,UHRF1,EGR1,VANGL1,CDC6,SPC25,GGCT,CDK1,CYP1B1,NCAPG2,EFNA1,CDKN1A,DSCC1,TCF19,NUCB2,PTER,TM4SF1,ITGAX                                                                                                   |

**Supplemental Table 9: Functional annotation of E2F7/8 target genes**

| <b>IPA Category</b>                     | <b>E2F7/8 targets</b> | <b>B-H <i>P</i>-value</b> | <b>Molecules</b>             |
|-----------------------------------------|-----------------------|---------------------------|------------------------------|
| Hepatic System Development and Function | developmental         | 4.31E-05                  | E2F1,E2F7,E2F8               |
|                                         | tumor                 | 3.65E-03                  | EGR1,CDKN1A,E2F1,HES1        |
| Hepatic System Disease                  | developmental         | 2.42E-03                  | CCNA2,POLE,RRM2,TPX2         |
|                                         | tumor                 | 2.00E-02                  | CCNA2,TOP2A,RRM2,HES1,TM4SF1 |

**Supplemental Table 10: Expression of E2F7/8 regulated targets (developmental) in human liver disease**

| Gene Symbol | Median expression value |           |            |           |              | Fold Change (Cirrhotic/Normal) | Cirrhotic P-value‡ | Fold Change (Adv HCC/Normal) | Adv HCC P-value‡ |
|-------------|-------------------------|-----------|------------|-----------|--------------|--------------------------------|--------------------|------------------------------|------------------|
|             | Normal                  | Cirrhotic | dysplastic | Early HCC | Advanced HCC |                                |                    |                              |                  |
| TOP2A       | 3.78                    | 3.98      | 3.95       | 5.60      | 8.28         | 1.05                           | 0.051              | 2.19                         | 0.000 *          |
| RRM2        | 5.30                    | 6.15      | 5.75       | 7.23      | 8.97         | 1.16                           | 0.006 *            | 1.69                         | 0.000 *          |
| CENPK       | 2.96                    | 3.40      | 3.10       | 3.53      | 5.00         | 1.15                           | 0.033 *            | 1.69                         | 0.000 *          |
| MLF1IP      | 4.40                    | 4.58      | 4.84       | 5.81      | 7.40         | 1.04                           | 0.392              | 1.68                         | 0.000 *          |
| HELLS       | 3.44                    | 3.91      | 3.73       | 4.39      | 5.75         | 1.14                           | 0.004 *            | 1.67                         | 0.000 *          |
| DTL         | 4.31                    | 4.53      | 4.45       | 5.56      | 7.17         | 1.05                           | 0.369              | 1.66                         | 0.000 *          |
| KIF11       | 3.14                    | 3.35      | 3.23       | 3.54      | 5.21         | 1.06                           | 0.044 *            | 1.66                         | 0.000 *          |
| UBE2T       | 4.55                    | 4.77      | 4.64       | 5.60      | 7.48         | 1.05                           | 0.188              | 1.64                         | 0.000 *          |
| SGOL2       | 3.60                    | 3.78      | 3.61       | 4.39      | 5.86         | 1.05                           | 0.116              | 1.63                         | 0.000 *          |
| E2F8        | 3.33                    | 3.43      | 3.45       | 3.78      | 5.28         | 1.03                           | 0.051              | 1.59                         | 0.000 *          |
| EZH2        | 4.27                    | 4.46      | 4.50       | 5.29      | 6.57         | 1.04                           | 0.033 *            | 1.54                         | 0.000 *          |
| UHRF1       | 4.07                    | 4.46      | 4.27       | 4.99      | 6.13         | 1.10                           | 0.029 *            | 1.51                         | 0.000 *          |
| CCNA2       | 4.08                    | 4.12      | 3.96       | 4.49      | 6.14         | 1.01                           | 0.512              | 1.51                         | 0.000 *          |
| CDC6        | 3.31                    | 3.41      | 3.47       | 3.59      | 4.97         | 1.03                           | 0.053              | 1.50                         | 0.000 *          |
| RAD51AP1    | 4.38                    | 4.51      | 4.39       | 5.05      | 6.38         | 1.03                           | 0.156              | 1.46                         | 0.000 *          |
| KIF18A      | 3.14                    | 3.09      | 3.12       | 3.31      | 4.56         | 0.98                           | 0.440              | 1.45                         | 0.000 *          |
| NUSAP1      | 6.05                    | 6.17      | 6.02       | 7.23      | 8.69         | 1.02                           | 0.302              | 1.44                         | 0.000 *          |
| TPX2        | 5.68                    | 5.84      | 5.86       | 6.19      | 8.10         | 1.03                           | 0.302              | 1.42                         | 0.000 *          |
| SPC25       | 3.33                    | 3.36      | 3.26       | 3.47      | 4.67         | 1.01                           | 0.128              | 1.40                         | 0.000 *          |
| SHCBP1      | 3.06                    | 3.20      | 3.15       | 3.47      | 4.28         | 1.05                           | 0.011 *            | 1.40                         | 0.000 *          |
| MELK        | 5.21                    | 5.37      | 5.11       | 6.03      | 7.17         | 1.03                           | 0.172              | 1.38                         | 0.000 *          |
| KNTC1       | 4.72                    | 4.95      | 4.84       | 5.15      | 6.40         | 1.05                           | 0.065              | 1.36                         | 0.000 *          |
| ATAD2       | 6.54                    | 6.38      | 6.70       | 7.79      | 8.72         | 0.97                           | 0.917              | 1.33                         | 0.000 *          |
| TRIP13      | 4.57                    | 4.60      | 4.47       | 5.01      | 6.02         | 1.01                           | 0.608              | 1.32                         | 0.000 *          |
| CENPL       | 3.93                    | 4.12      | 4.10       | 4.42      | 5.06         | 1.05                           | 0.006 *            | 1.29                         | 0.000 *          |
| STMN1       | 5.90                    | 6.16      | 5.84       | 6.61      | 7.46         | 1.04                           | 0.015 *            | 1.26                         | 0.000 *          |
| MCM2        | 6.14                    | 6.08      | 6.04       | 6.28      | 7.75         | 0.99                           | 0.739              | 1.26                         | 0.000 *          |
| CDCA5       | 5.31                    | 5.24      | 5.28       | 5.59      | 6.71         | 0.99                           | 0.812              | 1.26                         | 0.000 *          |
| MCM5        | 6.39                    | 6.95      | 6.81       | 6.81      | 8.04         | 1.09                           | 0.033 *            | 1.26                         | 0.000 *          |
| STIL        | 4.70                    | 4.82      | 4.67       | 5.20      | 5.89         | 1.03                           | 0.156              | 1.25                         | 0.000 *          |
| MASTL       | 4.49                    | 4.87      | 4.95       | 4.88      | 5.62         | 1.08                           | 0.083              | 1.25                         | 0.000 *          |
| HMGB2       | 7.37                    | 8.17      | 7.45       | 8.10      | 9.17         | 1.11                           | 0.029 *            | 1.24                         | 0.000 *          |
| MCM6        | 7.38                    | 7.73      | 7.47       | 7.92      | 9.02         | 1.05                           | 0.051              | 1.22                         | 0.000 *          |
| MCM3        | 7.04                    | 7.12      | 7.06       | 7.18      | 8.59         | 1.01                           | 0.223              | 1.22                         | 0.000 *          |
| NCAPG2      | 4.78                    | 4.72      | 4.65       | 4.99      | 5.81         | 0.99                           | 0.896              | 1.22                         | 0.000 *          |
| PRIM1       | 6.18                    | 5.64      | 5.48       | 6.21      | 7.49         | 0.91                           | 0.998              | 1.21                         | 0.000 *          |
| LMNB1       | 5.90                    | 5.65      | 5.62       | 6.15      | 7.14         | 0.96                           | 0.962              | 1.21                         | 0.000 *          |
| SMC2        | 5.51                    | 5.40      | 5.40       | 5.67      | 6.61         | 0.98                           | 0.858              | 1.20                         | 0.000 *          |
| MCM7        | 6.97                    | 7.07      | 7.00       | 7.35      | 8.35         | 1.01                           | 0.416              | 1.20                         | 0.000 *          |
| PSRC1       | 4.38                    | 4.55      | 4.84       | 4.70      | 5.19         | 1.04                           | 0.104              | 1.18                         | 0.000 *          |
| PAK1IP1     | 6.66                    | 6.81      | 7.09       | 7.73      | 7.83         | 1.02                           | 0.281              | 1.17                         | 0.002 *          |
| SPAG5       | 6.56                    | 6.68      | 6.65       | 6.72      | 7.69         | 1.02                           | 0.369              | 1.17                         | 0.000 *          |
| EXO1        | 4.87                    | 4.65      | 4.73       | 4.95      | 5.70         | 0.95                           | 0.979              | 1.17                         | 0.000 *          |
| SMC4        | 7.42                    | 7.41      | 7.53       | 8.06      | 8.66         | 1.00                           | 0.795              | 1.17                         | 0.000 *          |
| PCNA        | 8.27                    | 8.67      | 8.73       | 8.92      | 9.63         | 1.05                           | 0.015 *            | 1.16                         | 0.000 *          |
| TCF19       | 5.51                    | 5.46      | 5.24       | 5.75      | 6.38         | 0.99                           | 0.676              | 1.16                         | 0.000 *          |
| CDCA3       | 5.84                    | 5.78      | 5.73       | 5.98      | 6.74         | 0.99                           | 0.739              | 1.15                         | 0.000 *          |

**Supplemental Table 10: Expression of E2F7/8 regulated targets (developmental) in human liver disease**

| Gene Symbol | Median expression value |           |            |           |              | Fold Change (Cirrhotic/Normal) | Cirrhotic P-value‡ | Fold Change (Adv HCC/Normal) | Adv HCC P-value‡ |
|-------------|-------------------------|-----------|------------|-----------|--------------|--------------------------------|--------------------|------------------------------|------------------|
|             | Normal                  | Cirrhotic | dysplastic | Early HCC | Advanced HCC |                                |                    |                              |                  |
| DSN1        | 4.91                    | 4.90      | 4.77       | 5.06      | 5.63         | 1.00                           | 0.536              | 1.15                         | 0.000 *          |
| CENPH       | 4.64                    | 4.55      | 4.57       | 4.56      | 5.32         | 0.98                           | 0.896              | 1.15                         | 0.000 *          |
| BUB3        | 8.31                    | 8.73      | 8.76       | 9.20      | 9.42         | 1.05                           | 0.001 *            | 1.13                         | 0.000 *          |
| TIMELESS    | 6.27                    | 6.13      | 6.10       | 6.40      | 7.10         | 0.98                           | 0.975              | 1.13                         | 0.000 *          |
| BRIP1       | 5.32                    | 4.90      | 4.91       | 5.34      | 6.01         | 0.92                           | 0.926              | 1.13                         | 0.005 *          |
| LIG1        | 6.01                    | 6.04      | 6.07       | 6.35      | 6.74         | 1.01                           | 0.369              | 1.12                         | 0.000 *          |
| FBXO5       | 5.57                    | 5.52      | 5.55       | 5.64      | 6.19         | 0.99                           | 0.828              | 1.11                         | 0.001 *          |
| CDT1        | 5.33                    | 5.24      | 5.33       | 5.48      | 5.90         | 0.98                           | 0.858              | 1.11                         | 0.002 *          |
| RAD18       | 4.83                    | 4.62      | 4.90       | 5.02      | 5.32         | 0.96                           | 0.758              | 1.10                         | 0.016 *          |
| NSL1        | 8.38                    | 8.31      | 8.48       | 9.00      | 9.08         | 0.99                           | 0.512              | 1.08                         | 0.000 *          |
| GINS3       | 4.79                    | 4.78      | 4.54       | 4.78      | 5.19         | 1.00                           | 0.772              | 1.08                         | 0.005 *          |
| CLSPN       | 3.77                    | 3.78      | 3.84       | 3.72      | 4.07         | 1.00                           | 0.512              | 1.08                         | 0.003 *          |
| BRCA2       | 3.24                    | 3.16      | 3.29       | 3.21      | 3.47         | 0.98                           | 0.884              | 1.07                         | 0.015 *          |
| FDPS        | 9.84                    | 9.13      | 9.16       | 9.77      | 10.52        | 0.93                           | 0.987              | 1.07                         | 0.003 *          |
| CENPI       | 3.94                    | 3.79      | 3.82       | 3.86      | 4.21         | 0.96                           | 0.935              | 1.07                         | 0.023 *          |
| CHAF1A      | 6.22                    | 6.10      | 6.24       | 6.30      | 6.63         | 0.98                           | 0.858              | 1.07                         | 0.000 *          |
| FANCD2      | 4.73                    | 4.74      | 4.76       | 4.76      | 5.03         | 1.00                           | 0.392              | 1.06                         | 0.023 *          |
| RAD51       | 4.50                    | 4.36      | 4.27       | 4.41      | 4.78         | 0.97                           | 0.982              | 1.06                         | 0.006 *          |
| POLD1       | 5.91                    | 5.64      | 5.66       | 6.04      | 6.24         | 0.96                           | 0.967              | 1.06                         | 0.001 *          |
| CCNT1       | 7.82                    | 7.95      | 7.99       | 8.20      | 8.22         | 1.02                           | 0.093              | 1.05                         | 0.001 *          |
| TRA2A       | 7.95                    | 8.15      | 7.92       | 8.06      | 8.34         | 1.02                           | 0.104              | 1.05                         | 0.004 *          |
| DIDO1       | 6.63                    | 6.68      | 6.64       | 6.74      | 6.94         | 1.01                           | 0.142              | 1.05                         | 0.020 *          |
| NPL         | 7.62                    | 7.74      | 7.62       | 7.65      | 7.92         | 1.02                           | 0.044 *            | 1.04                         | 0.093            |
| AARS        | 8.99                    | 8.68      | 8.86       | 8.85      | 9.28         | 0.97                           | 0.917              | 1.03                         | 0.026 *          |
| SFPQ        | 4.07                    | 4.12      | 4.18       | 4.09      | 4.20         | 1.01                           | 0.281              | 1.03                         | 0.167            |
| RAD54L      | 4.73                    | 4.58      | 4.63       | 4.61      | 4.84         | 0.97                           | 0.904              | 1.02                         | 0.077            |
| ESPL1       | 5.97                    | 5.73      | 5.75       | 5.66      | 6.10         | 0.96                           | 0.926              | 1.02                         | 0.268            |
| E2F1        | 6.10                    | 5.88      | 5.92       | 6.02      | 6.14         | 0.96                           | 0.896              | 1.01                         | 0.193            |
| AHCTF1      | 6.64                    | 6.55      | 6.42       | 7.56      | 7.43         | 0.99                           | 0.758              | 1.12                         | 0.000 *          |
| BCL6        | 9.06                    | 8.98      | 9.60       | 9.64      | 8.98         | 0.99                           | 0.464              | 0.99                         | 0.748            |
| PAWR        | 7.85                    | 7.74      | 7.75       | 8.14      | 8.10         | 0.99                           | 0.488              | 1.03                         | 0.207            |
| FBXL20      | 7.29                    | 7.11      | 7.06       | 7.35      | 7.31         | 0.98                           | 0.893              | 1.00                         | 0.451            |
| PHGDH       | 8.61                    | 7.40      | 7.77       | 6.80      | 6.93         | 0.86                           | 0.997              | 0.81                         | 1.000            |
| POLE        | 7.11                    | 6.84      | 6.88       | 6.82      | 6.91         | 0.96                           | 0.907              | 0.97                         | 0.778            |
| CHAC1       | 6.04                    | 5.82      | 5.99       | 5.56      | 5.46         | 0.96                           | 0.758              | 0.90                         | 0.998            |
| CHEK1       | 4.98                    | 4.61      | 4.76       | 4.78      | 4.91         | 0.92                           | 0.999              | 0.99                         | 0.549            |
| MCM8        | 4.47                    | 4.40      | 4.47       | 4.29      | 4.40         | 0.98                           | 0.631              | 0.98                         | 0.936            |
| SYCE2       | 4.41                    | 4.21      | 4.38       | 4.22      | 4.26         | 0.96                           | 0.956              | 0.96                         | 0.954            |
| E2F7        | 5.06                    | 4.94      | 5.14       | 4.93      | 4.99         | 0.98                           | 0.816              | 0.99                         | 0.763            |
| CYR61       | 9.86                    | 10.41     | 9.99       | 8.66      | 7.79         | 1.06                           | 0.025 *            | 0.79                         | 1.000            |
| PKMYT1      | 6.45                    | 6.34      | 6.23       | 6.22      | 6.44         | 0.98                           | 0.942              | 1.00                         | 0.626            |

‡ P-value vs. normal Wilcoxon method with Benjamini–Hochberg (BH) correction.

\*P≤0.05 vs. normal

Supplemental Table 11: Expression of E2F7/8 regulated targets (tumor) in human liver disease

| Gene Symbol | Median expression value |           |            |           |              | Fold Change (Cirrhotic/Normal) | Cirrhotic P-value‡ | Fold Change (Adv HCC/Normal) | Adv HCC P-value‡ |
|-------------|-------------------------|-----------|------------|-----------|--------------|--------------------------------|--------------------|------------------------------|------------------|
|             | Normal                  | Cirrhotic | dysplastic | Early HCC | Advanced HCC |                                |                    |                              |                  |
| TOP2A       | 3.78                    | 3.98      | 3.95       | 5.60      | 8.28         | 1.05                           | 0.051              | 2.19                         | 0.000 *          |
| HMMR        | 4.34                    | 4.42      | 4.53       | 6.10      | 7.63         | 1.02                           | 0.058              | 1.76                         | 0.000 *          |
| RRM2        | 5.30                    | 6.15      | 5.75       | 7.23      | 8.97         | 1.16                           | 0.006 *            | 1.69                         | 0.000 *          |
| CDK1        | 4.55                    | 4.95      | 4.86       | 5.71      | 7.54         | 1.09                           | 0.065              | 1.66                         | 0.000 *          |
| UHRF1       | 4.07                    | 4.46      | 4.27       | 4.99      | 6.13         | 1.10                           | 0.029 *            | 1.51                         | 0.000 *          |
| CCNA2       | 4.08                    | 4.12      | 3.96       | 4.49      | 6.14         | 1.01                           | 0.512              | 1.51                         | 0.000 *          |
| CDC6        | 3.31                    | 3.41      | 3.47       | 3.59      | 4.97         | 1.03                           | 0.053              | 1.50                         | 0.000 *          |
| SPC25       | 3.33                    | 3.36      | 3.26       | 3.47      | 4.67         | 1.01                           | 0.128              | 1.40                         | 0.000 *          |
| ATAD2       | 6.54                    | 6.38      | 6.70       | 7.79      | 8.72         | 0.97                           | 0.917              | 1.33                         | 0.000 *          |
| TRIP13      | 4.57                    | 4.60      | 4.47       | 5.01      | 6.02         | 1.01                           | 0.608              | 1.32                         | 0.000 *          |
| STMN1       | 5.90                    | 6.16      | 5.84       | 6.61      | 7.46         | 1.04                           | 0.015 *            | 1.26                         | 0.000 *          |
| CDCA5       | 5.31                    | 5.24      | 5.28       | 5.59      | 6.71         | 0.99                           | 0.812              | 1.26                         | 0.000 *          |
| MCM5        | 6.39                    | 6.95      | 6.81       | 6.81      | 8.04         | 1.09                           | 0.033 *            | 1.26                         | 0.000 *          |
| MCM6        | 7.38                    | 7.73      | 7.47       | 7.92      | 9.02         | 1.05                           | 0.051              | 1.22                         | 0.000 *          |
| NCAPG2      | 4.78                    | 4.72      | 4.65       | 4.99      | 5.81         | 0.99                           | 0.896              | 1.22                         | 0.000 *          |
| PSRC1       | 4.38                    | 4.55      | 4.84       | 4.70      | 5.19         | 1.04                           | 0.104              | 1.18                         | 0.000 *          |
| IER5        | 6.92                    | 7.75      | 7.52       | 7.77      | 8.19         | 1.12                           | 0.000 *            | 1.18                         | 0.002 *          |
| TCF19       | 5.51                    | 5.46      | 5.24       | 5.75      | 6.38         | 0.99                           | 0.676              | 1.16                         | 0.000 *          |
| TAGLN2      | 9.08                    | 9.65      | 9.62       | 10.06     | 10.24        | 1.06                           | 0.013 *            | 1.13                         | 0.010 *          |
| MTMR11      | 5.92                    | 6.20      | 6.04       | 6.29      | 6.50         | 1.05                           | 0.128              | 1.10                         | 0.029 *          |
| BTG3        | 7.46                    | 7.95      | 7.83       | 7.95      | 8.12         | 1.07                           | 0.093              | 1.09                         | 0.005 *          |
| CD2AP       | 7.80                    | 7.73      | 7.89       | 8.00      | 8.48         | 0.99                           | 0.608              | 1.09                         | 0.000 *          |
| ABI2        | 7.02                    | 7.52      | 7.27       | 7.35      | 7.60         | 1.07                           | 0.000 *            | 1.08                         | 0.000 *          |
| RAD51C      | 6.86                    | 6.67      | 6.59       | 6.91      | 7.42         | 0.97                           | 0.942              | 1.08                         | 0.029 *          |
| TUBA1B      | 11.00                   | 11.26     | 11.14      | 11.62     | 11.87        | 1.02                           | 0.156              | 1.08                         | 0.001 *          |
| GGCT        | 8.89                    | 8.88      | 8.90       | 9.20      | 9.49         | 1.00                           | 0.346              | 1.07                         | 0.000 *          |
| CDKN2C      | 6.37                    | 6.23      | 6.35       | 6.54      | 6.76         | 0.98                           | 0.858              | 1.06                         | 0.001 *          |
| EFNA1       | 10.09                   | 10.12     | 10.52      | 10.50     | 10.65        | 1.00                           | 0.654              | 1.06                         | 0.014 *          |
| TRA2A       | 7.95                    | 8.15      | 7.92       | 8.06      | 8.34         | 1.02                           | 0.104              | 1.05                         | 0.004 *          |
| SLC1A5      | 6.11                    | 6.14      | 6.08       | 6.04      | 6.23         | 1.01                           | 0.242              | 1.02                         | 0.132            |
| FST         | 9.86                    | 9.56      | 9.64       | 10.00     | 10.06        | 0.97                           | 0.758              | 1.02                         | 0.222            |
| U2          | 2.94                    | 2.93      | 2.90       | 2.94      | 2.96         | 1.00                           | 0.512              | 1.01                         | 0.119            |
| E2F1        | 6.10                    | 5.88      | 5.92       | 6.02      | 6.14         | 0.96                           | 0.896              | 1.01                         | 0.193            |
| SHANK2      | 7.16                    | 7.46      | 7.41       | 8.24      | 7.79         | 1.04                           | 0.058              | 1.09                         | 0.014 *          |
| HSPBAP1     | 5.46                    | 5.72      | 5.94       | 6.27      | 5.65         | 1.05                           | 0.038 *            | 1.03                         | 0.042 *          |
| ANO10       | 6.52                    | 6.77      | 6.88       | 7.15      | 6.95         | 1.04                           | 0.011 *            | 1.07                         | 0.001 *          |
| CYP1B1      | 6.34                    | 6.89      | 6.63       | 6.90      | 6.45         | 1.09                           | 0.011 *            | 1.02                         | 0.356            |
| DAPK2       | 6.02                    | 5.94      | 5.92       | 6.38      | 6.10         | 0.99                           | 0.369              | 1.01                         | 0.077            |
| VANGL1      | 5.80                    | 6.00      | 6.01       | 6.06      | 6.03         | 1.03                           | 0.044 *            | 1.04                         | 0.029 *          |
| PAWR        | 7.85                    | 7.74      | 7.75       | 8.14      | 8.10         | 0.99                           | 0.488              | 1.03                         | 0.207            |
| LRFN3       | 4.60                    | 4.67      | 4.60       | 4.73      | 4.70         | 1.02                           | 0.223              | 1.02                         | 0.252            |
| NUCB2       | 8.61                    | 8.15      | 8.34       | 8.61      | 8.61         | 0.95                           | 0.967              | 1.00                         | 0.549            |
| TFRC        | 10.08                   | 9.64      | 11.19      | 10.32     | 10.79        | 0.96                           | 0.631              | 1.07                         | 0.121            |
| PTER        | 7.59                    | 7.59      | 8.12       | 7.61      | 7.63         | 1.00                           | 0.654              | 1.01                         | 0.510            |
| SMOX        | 6.33                    | 6.18      | 6.39       | 6.18      | 6.22         | 0.98                           | 0.962              | 0.98                         | 0.999            |
| CDKN1A      | 8.51                    | 9.55      | 9.31       | 8.82      | 7.94         | 1.12                           | 0.001 *            | 0.93                         | 0.984            |
| TPM4        | 6.41                    | 7.18      | 6.47       | 6.23      | 7.14         | 1.12                           | 0.009 *            | 1.11                         | 0.033 *          |

**Supplemental Table 11: Expression of E2F7/8 regulated targets (tumor) in human liver disease**

| Gene Symbol | Median expression value |           |            |           |              | Fold Change (Cirrhotic/Normal) | Cirrhotic P-value‡ | Fold Change (Adv HCC/Normal) | Adv HCC P-value‡ |
|-------------|-------------------------|-----------|------------|-----------|--------------|--------------------------------|--------------------|------------------------------|------------------|
|             | Normal                  | Cirrhotic | dysplastic | Early HCC | Advanced HCC |                                |                    |                              |                  |
| DPYSL2      | 8.93                    | 9.73      | 8.83       | 9.07      | 8.65         | 1.09                           | 0.001 *            | 0.97                         | 0.888            |
| TM4SF1      | 9.58                    | 10.43     | 10.18      | 10.00     | 10.08        | 1.09                           | 0.001 *            | 1.05                         | 0.023 *          |
| PLSCR1      | 9.77                    | 10.45     | 10.23      | 9.61      | 9.05         | 1.07                           | 0.018 *            | 0.93                         | 0.977            |
| DUSP6       | 10.21                   | 10.74     | 10.21      | 9.86      | 9.64         | 1.05                           | 0.001 *            | 0.94                         | 0.997            |
| HES1        | 8.14                    | 8.48      | 8.47       | 7.82      | 7.69         | 1.04                           | 0.346              | 0.95                         | 0.984            |
| NES         | 6.39                    | 6.59      | 6.17       | 6.40      | 6.57         | 1.03                           | 0.242              | 1.03                         | 0.102            |
| ITGAX       | 5.46                    | 5.62      | 5.42       | 5.50      | 5.51         | 1.03                           | 0.051              | 1.01                         | 0.252            |
| UNC119      | 6.88                    | 6.99      | 6.87       | 6.93      | 6.91         | 1.02                           | 0.142              | 1.00                         | 0.285            |
| DSCC1       | 6.07                    | 6.09      | 6.03       | 5.93      | 6.02         | 1.00                           | 0.654              | 0.99                         | 0.915            |
| SERPINE1    | 9.79                    | 8.85      | 9.20       | 7.94      | 7.05         | 0.90                           | 0.967              | 0.72                         | 0.999            |
| CYP39A1     | 9.24                    | 8.41      | 9.17       | 7.01      | 6.23         | 0.91                           | 0.975              | 0.67                         | 1.000            |
| PHGDH       | 8.61                    | 7.40      | 7.77       | 6.80      | 6.93         | 0.86                           | 0.997              | 0.81                         | 1.000            |
| CHMP2B      | 8.28                    | 8.24      | 8.25       | 8.21      | 8.24         | 1.00                           | 0.719              | 1.00                         | 0.763            |
| KAZALD1     | 5.29                    | 5.25      | 5.19       | 5.10      | 5.21         | 0.99                           | 0.654              | 0.98                         | 0.833            |
| SLC2A4      | 4.47                    | 4.26      | 4.41       | 4.21      | 4.21         | 0.95                           | 0.987              | 0.94                         | 0.999            |
| DLX4        | 4.37                    | 4.24      | 4.27       | 4.27      | 4.27         | 0.97                           | 0.795              | 0.98                         | 0.943            |
| CYR61       | 9.86                    | 10.41     | 9.99       | 8.66      | 7.79         | 1.06                           | 0.025 *            | 0.79                         | 1.000            |
| PKMYT1      | 6.45                    | 6.34      | 6.23       | 6.22      | 6.44         | 0.98                           | 0.942              | 1.00                         | 0.626            |
| ABHD2       | 9.61                    | 9.36      | 9.66       | 8.84      | 8.47         | 0.97                           | 0.631              | 0.88                         | 0.999            |
| EGR1        | 12.38                   | 11.73     | 11.26      | 10.12     | 9.41         | 0.95                           | 0.907              | 0.76                         | 1.000            |
| SEMA6B      | 6.89                    | 6.78      | 6.82       | 6.70      | 6.68         | 0.98                           | 0.982              | 0.97                         | 0.995            |

‡ P-value vs. normal Wilcoxon method with Benjamini–Hochberg (BH) correction.

\*P≤0.05 vs. normal

**Supplemental Table 12: Overview of E2F7/8 targets****Developmental targets**

| <b>Promoter occupied by</b> | <b>Gene</b> | <b>Name</b>                                                   | <b>Function</b>                                                | <b>in HCC (human tumors) by qPCR, IHC, ref IB</b> |    |
|-----------------------------|-------------|---------------------------------------------------------------|----------------------------------------------------------------|---------------------------------------------------|----|
| E2F8                        | AARS        | alanyl-tRNA synthetase                                        | tRNA synthase                                                  | --                                                | -- |
| E2F8                        | AHCTF1      | AT hook containing transcription factor 1                     | cell cycle/ nuclear pore assembly/cell division                | --                                                | -- |
| E2F8                        | BCL6        | B-cell CLL/lymphoma 6                                         | gene expression/ zinc finger transcription factor              | --                                                | -- |
| E2F7/8                      | BRCA2       | breast cancer 2, early onset                                  | DNA repair                                                     | Highly expressed                                  | 43 |
| E2F7/8                      | BRIP1       | BRCA1 interacting protein C-terminal helicase 1               | cell cycle/ DNA replication                                    | --                                                | -- |
| E2F8                        | BUB3        | BUB3 mitotic checkpoint protein                               | cell cycle/ spindle checkpoint                                 | --                                                | -- |
| E2F8                        | CCNT1       | cyclin T1                                                     | cell cycle/ CDK9 cyclin                                        | --                                                | -- |
| E2F7/8                      | CDCA3       | cell division cycle associated 3                              | cell cycle/ ubiquitin pathway                                  | Highly expressed, poor prognosis                  | 44 |
| E2F7/8                      | CDT1        | chromatin licensing and DNA replication factor 1              | cell cycle/ pre-replication complex                            | --                                                | -- |
| E2F7/8                      | CENPH       | centromere protein H                                          | cell cycle/ centromere-kinetochore complex                     | Highly expressed, poor prognosis                  | 45 |
| E2F7/8                      | CENPI       | centromere protein I                                          | cell cycle/ centromere-kinetochore complex                     | --                                                | -- |
| E2F8                        | CENPK       | centromere protein K                                          | cell cycle/ centromere-kinetochore complex                     | --                                                | -- |
| E2F8                        | CENPL       | centromere protein L                                          | cell cycle/ centromere-kinetochore complex                     | --                                                | -- |
| E2F8                        | CHAC1       | ChaC glutathione-specific gamma-glutamylcyclotransferase 1    | endoplasmic reticulum stress pathway                           | --                                                | -- |
| E2F7/8                      | CHAF1A      | chromatin assembly factor 1, subunit A (p150)                 | cell cycle/ DNA replication                                    | --                                                | -- |
| E2F7/8                      | CHEK1       | checkpoint kinase 1                                           | cell cycle/ Cell cycle arrest                                  | Highly expressed, poor prognosis                  | 46 |
| E2F7/8                      | CLSPN       | claspin                                                       | cell cycle/ DNA replication/Cell cycle arrest                  | --                                                | -- |
| E2F8                        | DIDO1       | death inducer-obliterator 1                                   | apoptosis                                                      | --                                                | -- |
| E2F7/8                      | DSN1        | DSN1 homolog, MIS12 kinetochore complex component             | cell cycle/ kinetochore assembly                               | --                                                | -- |
| E2F7/8                      | DTL         | denticleless E3 ubiquitin protein ligase homolog (Drosophila) | cell cycle/ ubiquitin pathway                                  | Highly expressed, poor prognosis                  | 47 |
| E2F7                        | E2F7        | E2F transcription factor 7                                    | cell cycle/ transcription factor                               | --                                                | -- |
| E2F7/8                      | E2F8        | E2F transcription factor 8                                    | cell cycle/ transcription factor                               | Highly expressed                                  | 20 |
| E2F8                        | ESPL1       | extra spindle pole bodies like 1, separase                    | cell cycle/ separation of sister chromatids                    | --                                                | -- |
| E2F7/8                      | EXO1        | exonuclease 1                                                 | DNA repair                                                     | --                                                | -- |
| E2F7/8                      | EZH2        | enhancer of zeste 2 polycomb repressive complex 2 subunit     | gene expression/ methyltransferase, transcriptional repression | Highly expressed, poor prognosis                  | 48 |
| E2F7/8                      | FANCD2      | Fanconi anemia, complementation group D2                      | DNA repair                                                     | --                                                | -- |
| E2F7/8                      | FBXL20      | F-box and leucine-rich repeat protein 20                      | ubiquitin pathway                                              | --                                                | -- |
| E2F7/8                      | FBXO5       | F-box protein 5                                               | cell cycle/ ubiquitin pathway                                  | Highly expressed, poor prognosis                  | 49 |
| E2F7/8                      | FDPS        | farnesyl diphosphate synthase                                 | metabolism/ cholesterol and sterol biosynthesis                | --                                                | -- |



**Supplemental Table 12: Overview of E2F7/8 targets****Developmental targets (cont)**

| Promoter occupied by | Gene     | Name                                                                  | Function                                                   | in HCC (human tumors) by qPCR, IHC, ref IB |    |
|----------------------|----------|-----------------------------------------------------------------------|------------------------------------------------------------|--------------------------------------------|----|
| E2F7/8               | GIN53    | GIN5 complex subunit 3 (Psf3 homolog)                                 | cell cycle/ DNA replication                                | --                                         | -- |
| E2F7/8               | HELLS    | helicase, lymphoid-specific                                           | cell cycle/ DNA repair/DNA methylation                     | --                                         | -- |
| E2F7/8               | HMGB2    | high mobility group box 2                                             | DNA repair                                                 | Highly expressed, poor prognosis           | 50 |
| E2F8                 | KIF11    | kinesin family member 11                                              | cell cycle/ spindle dynamics                               | --                                         | -- |
| E2F8                 | KIF18A   | kinesin family member 18A                                             | microtubule-associated molecular motor                     | Highly expressed, poor prognosis           | 51 |
| E2F7/8               | KNTC1    | kinetochore associated 1                                              | cell cycle/ chromosome segregation                         | --                                         | -- |
| E2F7/8               | LIG1     | ligase I, DNA, ATP-dependent                                          | cell cycle/ DNA replication, recombination, and repair     | --                                         | -- |
| E2F7/8               | LMNB1    | lamin B1                                                              | nuclear stability, chromatin structure and gene expression | --                                         | -- |
| E2F8                 | MASTL    | microtubule associated serine/threonine kinase-like                   | microtubule-associated serine/threonine kinase             | --                                         | -- |
| E2F7/8               | MCM2     | minichromosome maintenance complex component 2                        | cell cycle/ initiation of DNA replication                  | Highly expressed, poor prognosis           | 52 |
| E2F7/8               | MCM3     | minichromosome maintenance complex component 3                        | cell cycle/ initiation of DNA replication                  | --                                         | -- |
| E2F8                 | MCM7     | minichromosome maintenance complex component 7                        | cell cycle/ initiation of DNA replication                  | Highly expressed, poor prognosis           | 53 |
| E2F8                 | MCM8     | minichromosome maintenance 8 homologous recombination repair factor   | cell cycle/ initiation of DNA replication                  | --                                         | -- |
| E2F8                 | MELK     | maternal embryonic leucine zipper kinase                              | cell cycle/ kinase                                         | --                                         | -- |
| E2F7/8               | MLF1IP   | centromere protein U                                                  | cell cycle/ centromere-kinetochore complex                 | --                                         | -- |
| E2F8                 | NPL      | N-acetylneuraminic acid pyruvate lyase (dihydrodipicolinate synthase) | metabolism/ sialic acid                                    | --                                         | -- |
| E2F7/8               | NSL1     | NSL1, MIS12 kinetochore complex component                             | cell cycle/ chromosome movements                           | --                                         | -- |
| E2F8                 | NUSAP1   | nucleolar and spindle associated protein 1                            | cell cycle/ mitosis                                        | Highly expressed, poor prognosis           | 54 |
| E2F8                 | PAK1IP1  | PAK1 interacting protein 1                                            | cell-cycle/ ribosomal stress-induced nucleolar protein     | --                                         | -- |
| E2F7/8               | PCNA     | proliferating cell nuclear antigen                                    | cell cycle/ DNA synthesis                                  | Highly expressed, poor prognosis           | 55 |
| E2F7/8               | POLD1    | polymerase (DNA directed), delta 1, catalytic subunit                 | cell cycle/ DNA replication, and repair                    | Highly expressed                           | 56 |
| E2F8                 | POLE     | polymerase (DNA directed), epsilon, catalytic subunit                 | cell cycle/ DNA replication, recombination, and repair     | --                                         | -- |
| E2F8                 | PRIM1    | primase, DNA, polypeptide 1 (49kDa)                                   | cell cycle/ Okazaki fragments                              | --                                         | -- |
| E2F8                 | RAD18    | RAD18 E3 ubiquitin protein ligase                                     | cell cycle/ replication fork-stalling                      | --                                         | -- |
| E2F8                 | RAD51    | RAD51 recombinase                                                     | DNA repair                                                 | --                                         | -- |
| E2F7/8               | RAD51AP1 | RAD51 associated protein 1                                            | cell cycle                                                 | --                                         | -- |
| E2F7/8               | RAD54L   | RAD54-like ( <i>S. cerevisiae</i> )                                   | DNA repair                                                 | --                                         | -- |

**Supplemental Table 12: Overview of E2F7/8 targets****Developmental targets (cont)**

| Promoter occupied by | Gene     | Name                                           | Function                                               | in HCC (human tumors) by qPCR, IHC, ref IB |        |
|----------------------|----------|------------------------------------------------|--------------------------------------------------------|--------------------------------------------|--------|
| E2F8                 | SFPQ     | splicing factor proline/glutamine-rich         | mRNA trafficking                                       | --                                         | --     |
| E2F8                 | SGOL2    | shugoshin-like 2 (S. pombe)                    | meiosis                                                | --                                         | --     |
| E2F8                 | SHCBP1   | SHC SH2-domain binding protein 1               | cell cycle/ cytokinesis                                | Highly expressed                           | 57     |
| E2F8                 | SMC2     | structural maintenance of chromosomes 2        | cell cycle/ chromosome condensation /DNA repair        | --                                         | --     |
| E2F8                 | SMC4     | structural maintenance of chromosomes 4        | cell cycle/ chromosome condensation /DNA repair        | Highly expressed, poor prognosis           | 58, 59 |
| E2F8                 | SPAG5    | sperm associated antigen 5                     | cell cycle/ regulation of mitotic spindles             | --                                         | --     |
| E2F7/8               | STIL     | SCL/TAL1 interrupting locus                    | cell cycle/ mitotic spindle checkpoint                 | --                                         | --     |
| E2F8                 | SYCE2    | synaptonemal complex central element protein 2 | meiosis                                                | --                                         | --     |
| E2F7/8               | TIMELESS | timeless circadian clock                       | cell survival after damage or stress/ circadian rhythm | Reduced expression, poor prognosis         | 60     |
| E2F8                 | TPX2     | TPX2, microtubule-associated                   | cell cycle/ spindle assembly                           | Highly expressed, poor prognosis           | 61, 62 |
| E2F7/8               | UBE2T    | ubiquitin-conjugating enzyme E2T               | ubiquitin pathway                                      | --                                         | --     |

**Developmental and tumor targets**

| Promoter occupied by | Gene   | Name                                                     | Function                                                        | in HCC (human tumors) by qPCR, IHC, ref IB                                   |        |
|----------------------|--------|----------------------------------------------------------|-----------------------------------------------------------------|------------------------------------------------------------------------------|--------|
| E2F7/8               | ATAD2  | ATPase family, AAA domain containing 2                   | ATPase                                                          | Highly expressed, poor prognosis                                             | 63-65  |
| E2F8                 | CCNA2  | cyclin A2                                                | cell cycle/ S/M phase cyclin                                    | Highly expressed, poor prognosis                                             | 66     |
| E2F7/8               | CDC6   | cell division cycle 6                                    | cell cycle/ initiation of DNA replication                       | Highly expressed                                                             | 67     |
| E2F8                 | CDCA5  | cell division cycle associated 5                         | cell cycle/ chromatid cohesion                                  | --                                                                           | --     |
| E2F7                 | CYR61  | cysteine rich angiogenic inducer 61                      | secreted; interacts with integrins/heparan sulfate proteoglycan | Highly expressed in primary tumor and metastatic tumors, DNA damage response | 68-70  |
| E2F7/8               | E2F1   | E2F transcription factor 1                               | cell cycle/ G1/S transcription factor                           | Highly expressed, poor prognosis                                             | 71, 72 |
| E2F7/8               | MCM5   | minichromosome maintenance complex component 5           | cell cycle/ initiation of DNA replication                       | --                                                                           | --     |
| E2F7/8               | MCM6   | minichromosome maintenance complex component 6           | cell cycle/ initiation of DNA replication                       | Highly expressed, poor prognosis                                             | 73     |
| E2F8                 | NCAPG2 | non-SMC condensin II complex subunit G2                  | cell cycle/ chromosome assembly and segregation during mitosis  | --                                                                           | --     |
| E2F8                 | PAWR   | PRKC, apoptosis, WT1, regulator                          | gene expression/ transcription factor                           | --                                                                           | --     |
| E2F8                 | PHGDH  | phosphoglycerate dehydrogenase                           | metabolism/ enzyme, L-serine synthesis                          | --                                                                           | --     |
| E2F7                 | PKMYT1 | protein kinase, membrane associated tyrosine/threonine 1 | cell cycle/ negatively regulates the G2/M transition            | --                                                                           | --     |

**Supplemental Table 12: Overview of E2F7/8 targets**

|                                               |             |                                                   |                                                                                   |                                                            |        |
|-----------------------------------------------|-------------|---------------------------------------------------|-----------------------------------------------------------------------------------|------------------------------------------------------------|--------|
| E2F8                                          | PSRC1       | proline/serine-rich coiled-coil 1                 | cell cycle/ mitosis, microtubule destabilization                                  | Highly expressed                                           | 74     |
| <b>Developmental and tumor targets (cont)</b> |             |                                                   |                                                                                   |                                                            |        |
| <b>Promoter occupied by</b>                   | <b>Gene</b> | <b>Name</b>                                       | <b>Function</b>                                                                   | <b>in HCC (human tumors) by qPCR, IHC, ref IB</b>          |        |
| E2F7/8                                        | RRM2        | ribonucleotide reductase regulatory subunit M2    | ribonucleotide reductase                                                          | Highly expressed                                           | 75     |
| E2F7/8                                        | SPC25       | SPC25, NDC80 kinetochore complex component        | cell cycle/ kinetochore-microtubule interaction and spindle checkpoint activity   |                                                            |        |
| E2F8                                          | STMN1       | stathmin 1                                        | destabilizing microtubules                                                        | Highly expressed, poor prognosis, regulated by E2F1 in hcc | 72, 76 |
| E2F7/8                                        | TCF19       | transcription factor 19                           | PHD-type zinc finger transcription factor                                         | --                                                         | --     |
| E2F7/8                                        | TOP2A       | topoisomerase (DNA) II alpha                      | cell cycle/ controls topologic states of DNA during transcription and replication | Highly expressed, poor prognosis                           | 77, 78 |
| E2F8                                          | TRA2A       | transformer 2 alpha homolog                       | regulation of pre-mRNA splicing                                                   | Highly expressed                                           | 79     |
| E2F8                                          | TRIP13      | thyroid hormone receptor interactor 13            | gene expression/ hormone-dependent transcription factor/thyroid hormone receptors | --                                                         | --     |
| E2F7/8                                        | UHRF1       | ubiquitin-like with PHD and ring finger domains 1 | E3 ubiquitin ligase                                                               | Highly expressed, poor prognosis, induces hypomethylation  | 80, 81 |

**Tumor targets**

|                             |             |                                                           |                                                                          |                                                   |       |
|-----------------------------|-------------|-----------------------------------------------------------|--------------------------------------------------------------------------|---------------------------------------------------|-------|
| <b>Promoter occupied by</b> | <b>Gene</b> | <b>Name</b>                                               | <b>Function</b>                                                          | <b>in HCC (human tumors) by qPCR, IHC, ref IB</b> |       |
| E2F7                        | ABHD2       | abhydrolase domain containing 2                           | hydratase                                                                | --                                                | --    |
| E2F8                        | ABI2        | abl-interactor 2                                          | tumor suppressor                                                         | --                                                | --    |
| E2F8                        | ANO10       | anoctamin 10                                              | calcium-activated chloride channel                                       | --                                                | --    |
| E2F8                        | BTG3        | BTG family, member 3                                      | cell cycle/ anti-proliferative                                           | Reduced expression, poor prognosis                | 82    |
| E2F8                        | CD2AP       | CD2-associated protein                                    | actin remodeling/membrane trafficking during endocytosis and cytokinesis | --                                                | --    |
| E2F8                        | CDK1        | cyclin-dependent kinase 1                                 | cell cycle/ kinase, G1/S and G2/M transitions                            | Highly expressed                                  | 83    |
| E2F7/8                      | CDKN1A      | cyclin-dependent kinase inhibitor 1A (p21, Cip1)          | cell cycle/ G1 progression                                               | Highly expressed                                  | 84-86 |
| E2F7/8                      | CDKN2C      | cyclin-dependent kinase inhibitor 2C (p18, inhibits CDK4) | cell cycle/ inhibits Cdk4 and Cdk6                                       | Reduced expression, poor prognosis                | 87    |
| E2F8                        | CHMP2B      | charged multivesicular body protein 2B                    | signaling/ recycling and degradation of cell surface receptors           | --                                                | --    |
| E2F8                        | CYP1B1      | cytochrome P450, family 1, subfamily B, polypeptide 1     | metabolism/ procarcinogens to carcinogens, estrogen                      | --                                                | --    |
| E2F8                        | CYP39A1     | cytochrome P450, family 39, subfamily A, polypeptide 1    | metabolism/ cholesterol to bile acids                                    | --                                                | --    |
| E2F8                        | DAPK2       | death-associated protein kinase 2                         | serine/threonine kinase/ pro-apoptotic                                   | --                                                | --    |

**Supplemental Table 12: Overview of E2F7/8 targets**

|                             |             |                                                                                               |                                                                                                 |                                                   |        |
|-----------------------------|-------------|-----------------------------------------------------------------------------------------------|-------------------------------------------------------------------------------------------------|---------------------------------------------------|--------|
| E2F8                        | DLX4        | distal-less homeobox 4                                                                        | gene expression/ transcription factor, differentiation                                          | Highly expressed, poor prognosis                  | 88     |
| E2F7/8                      | DPYSL2      | dihydropyrimidinase-like 2                                                                    | Collapsin response mediator proteins/ regulation of neurons                                     | --                                                | --     |
| <b>Tumor targets (cont)</b> |             |                                                                                               |                                                                                                 |                                                   |        |
| <b>Promoter occupied by</b> | <b>Gene</b> | <b>Name</b>                                                                                   | <b>Function</b>                                                                                 | <b>in HCC (human tumors) by qPCR, IHC, ref IB</b> |        |
| E2F8                        | DSCC1       | DNA replication and sister chromatid cohesion 1                                               | cell cycle/ S phase; replication factor C complex                                               | --                                                | --     |
| E2F8                        | DUSP6       | dual specificity phosphatase 6                                                                | signaling/ phosphatase, negatively regulates MAPK                                               | Highly expressed, indicates recurrence            | 89     |
| E2F8                        | EFNA1       | ephrin-A1                                                                                     | signaling/ receptor protein-tyrosine kinase/ development (nervous system/ erythropoiesis)       | Highly expressed, indicates recurrence            | 90, 91 |
| E2F7                        | EGR1        | early growth response 1                                                                       | gene expression/ transcriptional regulator, MAPK signaling                                      | No expression                                     | 92     |
| E2F8                        | FST         | follistatin                                                                                   | signaling/ inhibits follicle-stimulating hormone release                                        | Highly expressed                                  | 93     |
| E2F7/8                      | GGCT        | gamma-glutamylcyclotransferase                                                                | metabolism/ glutathione catabolism; cell proliferation                                          | --                                                | --     |
| E2F8                        | HES1        | hes family bHLH transcription factor 1                                                        | signaling/ Notch, bHLH transcription factor                                                     | High expression correlates with good prognosis    | 94     |
| E2F8                        | HMMR        | hyaluronan-mediated motility receptor (RHAMM)                                                 | cell motility                                                                                   | Highly expressed, poor prognosis                  | 95     |
| E2F8                        | HSPBAP1     | HSPB (heat shock 27kDa) associated protein 1                                                  | binds heat shock proteins, involved with cell growth and differentiation                        | Highly expressed                                  | 96     |
| E2F8                        | IER5        | immediate early response 5                                                                    | signaling/ cellular response to mitogenic signals                                               | --                                                | --     |
| E2F8                        | ITGAX       | integrin, alpha X (complement component 3 receptor 4 subunit)                                 | Integrins/ adherence/ neuron marker                                                             | --                                                | --     |
| E2F8                        | KAZALD1     | Kazal-type serine peptidase inhibitor domain 1                                                | signaling/ secreted member of the insulin growth factor-binding protein (IGFBP) superfamily     | --                                                | --     |
| E2F8                        | LRFN3       | leucine rich repeat and fibronectin type III domain containing 3                              | development/ neuronal                                                                           | --                                                | --     |
| E2F8                        | MTMR11      | myotubularin related protein 11                                                               | protein phosphatase                                                                             | --                                                | --     |
| E2F8                        | NES         | nestin                                                                                        | intermediate filament protein                                                                   | Highly expressed, poor prognosis                  | 97     |
| E2F7/8                      | NUCB2       | nucleobindin 2                                                                                | metabolism/ energy and insulin resistance                                                       | --                                                | --     |
| E2F7/8                      | PLSCR1      | phospholipid scramblase 1                                                                     | antiviral activity against DNA and RNA viruses including HBV                                    | --                                                | --     |
| E2F8                        | PTER        | phosphotriesterase related                                                                    |                                                                                                 | --                                                | --     |
| E2F8                        | RAD51C      | RAD51 paralog C                                                                               | DNA repair                                                                                      | --                                                | --     |
| E2F7                        | SEMA6B      | sema domain, transmembrane domain (TM), and cytoplasmic domain, (semaphorin) 6B               | nervous system development                                                                      | --                                                | --     |
| E2F8                        | SERPINE1    | serpin peptidase inhibitor, clade E (nexin, plasminogen activator inhibitor type 1), member 1 | serine proteinase inhibitor inhibitor of tissue plasminogen activator (tPA) and urokinase (uPA) | --                                                | --     |
| E2F8                        | SHANK2      | SH3 and multiple ankyrin repeat domains 2                                                     | molecular scaffolds                                                                             | --                                                | --     |

**Supplemental Table 12: Overview of E2F7/8 targets**

|        |        |                                                                    |                                                                                                                     |                  |    |
|--------|--------|--------------------------------------------------------------------|---------------------------------------------------------------------------------------------------------------------|------------------|----|
| E2F7/8 | SLC1A5 | solute carrier family 1 (neutral amino acid transporter), member 5 | transporter/ sodium-dependent neutral amino acid transporter that can act as a receptor for RD114/type D retrovirus | Highly expressed | 98 |
|--------|--------|--------------------------------------------------------------------|---------------------------------------------------------------------------------------------------------------------|------------------|----|

**Tumor targets (cont)**

| Promoter occupied by | Gene   | Name                                                                | Function                                                                                                 | in HCC (human tumors) by qPCR, IHC, ref IB |     |
|----------------------|--------|---------------------------------------------------------------------|----------------------------------------------------------------------------------------------------------|--------------------------------------------|-----|
| E2F7/8               | SLC2A4 | solute carrier family 2 (facilitated glucose transporter), member 4 | transporter/ insulin-regulated facilitative glucose transporter                                          | --                                         | --  |
| E2F8                 | SMOX   | spermine oxidase                                                    | metabolism/ catalyzes the oxidation of spermine to spermadine and secondarily produces hydrogen peroxide | --                                         | --  |
| E2F8                 | TAGLN2 | transgelin 2                                                        | actin regulation                                                                                         | --                                         | --  |
| E2F8                 | TFRC   | transferrin receptor                                                | signaling/ cell surface receptor necessary for cellular iron uptake                                      | Highly expressed                           | 99  |
| E2F8                 | TM4SF1 | transmembrane 4 L six family member 1                               | signaling/ cell development, activation, growth and motility                                             | Highly expressed                           | 100 |
| E2F8                 | TPM4   | tropomyosin 4                                                       | actin-binding, contraction                                                                               | --                                         | --  |
| E2F8                 | TUBA1B | tubulin, alpha 1b                                                   | cell cycle/ cytoskeleton component                                                                       | Highly expressed, poor prognosis           | 101 |
| E2F7/8               | U1     | RNA, U1 small nuclear 1                                             | splicing of pre-mRNAs                                                                                    | --                                         | --  |
| E2F7/8               | U2     | RNA, U2 small nuclear 1                                             | splicing of pre-mRNAs                                                                                    | --                                         | --  |
| E2F8                 | UNC119 | unc-119 lipid binding chaperone                                     | signaling/ G protein trafficking, SRC-type tyrosine kinases                                              | Highly expressed, poor prognosis           | 102 |
| E2F8                 | VANGL1 | VANGL planar cell polarity protein 1                                | signaling/ WNT, cell polarity                                                                            | Highly expressed                           | 103 |

**Supplemental Table S13: Oligonucleotide sequences used for genotyping**

| Allele(s)                                                                                                       | Primer 1                 | Primer 2              | Primer 3                 |
|-----------------------------------------------------------------------------------------------------------------|--------------------------|-----------------------|--------------------------|
| <i>Cre</i>                                                                                                      | CCTGTTTTGCACGTTACCG      | ATGCTTCTGTCCGTTTGCCG  |                          |
| <i>E2f7<sup>+</sup></i> ,<br><i>E2f7<sup>fl</sup></i> ,<br><i>E2f7<sup>-</sup></i>                              | AGGCAGCACACTTGACACG      | ACTTTTGGGACAGAGGTAGGA | CCAAGATGAAGGCCGAGATGCTAC |
| <i>E2f8<sup>+</sup></i> ,<br><i>E2f8<sup>fl</sup></i> ,<br><i>E2f8<sup>Δ</sup></i> ,<br><i>E2f8<sup>-</sup></i> | TAAAAAGCTTTGCGGTCGTT     | AAGCCAACCTCGATGAATTG  | CTCGCATCATCGTCTGCTAA     |
| <i>E2f8<sup>+</sup></i> ,<br><i>E2f8<sup>fl</sup></i> ,<br><i>E2f8<sup>Δ</sup></i> ,<br><i>E2f8<sup>-</sup></i> | CTCGCATCATCGTCTGCTAA     | CCTGAGTTTGATCCACAGCA  | GGGAATTCAAAGCCTCACAA     |
| <i>E2f8<sup>+</sup></i> ,<br><i>E2f8<sup>DBD</sup></i>                                                          | TTTTTAAATCGAAGGCGGAAGGTC | CAGGTACAGTCCCCAGCAGT  |                          |

**Supplemental Table S14: Oligonucleotide sequences used for quantitative PCR**

| <b>Gene symbol</b> | <b>Forward (5' -&gt; 3')</b> | <b>Reverse (5' -&gt; 3')</b> |
|--------------------|------------------------------|------------------------------|
| <i>E2f7</i>        | GATGCGTTCGTGAACTCCCTG        | AGAAACTTCTGGCACAGCAGCC       |
| <i>E2f8</i>        | GAGAAATCCCAGCCGAGTC          | CATAAATCCGCCGACGTT           |
| <i>Gapdh</i>       | GAAGGTCGGTGTGAACGG           | TGAAGGGGTCGTTGATGG           |

**Supplemental Table S15: Oligonucleotide sequences used for ChIP-qPCR**

| <b>Gene symbol</b>         | <b>Forward (5' -&gt; 3')</b> | <b>Reverse (5' -&gt; 3')</b> |
|----------------------------|------------------------------|------------------------------|
| <i>CDC6</i>                | AAAGGCTCTGTGACTACAGCCA       | GATCCTTCTCACGTCTCTCACA       |
| <i>MCM3</i>                | AGGGGAGGAACAGAGAATCC         | CGCTGCCAAAGAACTACCTC         |
| <i>MCM5</i>                | ATTGTTCCGCACACAAAATG         | ACCAGGGGAGACAAGAACCT         |
| <i>TUBA4A</i>              | ATGGAGGGATGAATGGTTATGC       | CTTTTTGGGTCTGGCTTCTTTCAC     |
| <i>UHFR1</i>               | AGAGTTCAGGGGGTCTGTACC        | ACTCGGCATTTGGGAGTTG          |
| <i>CHEK1</i>               | GCTGTCTTGCTTTACGGCG          | ACTGTCCTTTGCCACCAC           |
| <i>FDPS</i>                | GGGCACATTGGGAGTTGTAG         | CTTGTTGGCGGGTACTCCTA         |
| <i>MCM2</i>                | GTTCCGTAGGGCTCTTCCCG         | CAGTACCACGATCCTCTCCGC        |
| <i>PRIM1</i>               | CGCCAATTCCTGTGGTAATC         | CCATCACCTCCACCGTAGTT         |
| <i>RAD51</i>               | GCTCAGACGATACTCTCGCCTC       | CGCTAACCCAAGACGGGAG          |
| <i>TIMELESS</i>            | GAGTGAGTGTGTGGCGAGAG         | CGGGAGACTAAGGAGCAGAG         |
| <i>TOP2A</i>               | CGGGCTAAAGGAAGGTTCA          | AAGCGACTAACAGGCAGGA          |
| <i>TOP2A<sup>neg</sup></i> | TCAGGATTCCCATCTTCCTG         | GAAAGGGTGGAGTGGTGCTA         |
